# Supplementary material for: A latitudinal phylogeographic diversity gradient in birds
Source: PLoS Biol. 2017 Apr 13;15(4):e2001073. doi: 10.1371/journal.pbio.2001073 (PMC5390966; doi:10.1371/journal.pbio.2001073)
Supplement: S3 Table — (XLSX) [file pbio.2001073.s010.xlsx]

## Sheet: AOU - Model Summaries
Model Set	Variable Removed*	Description of Model (see Materials and Methods for which variables were square root converted)	P-value	adj.R2	AICc	delta AICc	AICc weight	*see Variable Key in S2 Table
Mean Crown Age.climate.stability	Tarsus Length	Mean Crown Age ~ Prop. Range Size Sampled+Range Size+CS Annual Temp.+CS Temp. Seasonality+CS Annual Precip.+CS Precip. Seasonality+Elevation+Hand Wing Index+Migratory Distance+Landscape Ruggedness	<0.001	0.344	266.05	-2.185	0.247
Mean Crown Age.climate.stability	Migratory Distance	Mean Crown Age ~ Prop. Range Size Sampled+Range Size+CS Annual Temp.+CS Temp. Seasonality+CS Annual Precip.+CS Precip. Seasonality+Elevation+Tarsus Length+Hand Wing Index+Landscape Ruggedness	<0.001	0.343	266.291	-1.944	0.219
Mean Crown Age.climate.stability	Elevation	Mean Crown Age ~ Prop. Range Size Sampled+Range Size+CS Annual Temp.+CS Temp. Seasonality+CS Annual Precip.+CS Precip. Seasonality+Tarsus Length+Hand Wing Index+Migratory Distance+Landscape Ruggedness	<0.001	0.339	267.726	-0.509	0.107
Mean Crown Age.climate.stability	CS_bio_15	Mean Crown Age ~ Prop. Range Size Sampled+Range Size+CS Annual Temp.+CS Temp. Seasonality+CS Annual Precip.+Elevation+Tarsus Length+Hand Wing Index+Migratory Distance+Landscape Ruggedness	<0.001	0.336	267.896	-0.339	0.098
Mean Crown Age.climate.stability	Full Model	Mean Crown Age ~ Prop. Range Size Sampled+Range Size+CS Annual Temp.+CS Temp. Seasonality+CS Annual Precip.+CS Precip. Seasonality+Elevation+Tarsus Length+Hand Wing Index+Migratory Distance+Landscape Ruggedness	<0.001	0.341	268.235	0	0.083
Mean Crown Age.climate.stability	CS_bio_04	Mean Crown Age ~ Prop. Range Size Sampled+Range Size+CS Annual Temp.+CS Annual Precip.+CS Precip. Seasonality+Elevation+Tarsus Length+Hand Wing Index+Migratory Distance+Landscape Ruggedness	<0.001	0.336	268.308	0.073	0.08
Mean Crown Age.climate.stability	Hand Wing Index	Mean Crown Age ~ Prop. Range Size Sampled+Range Size+CS Annual Temp.+CS Temp. Seasonality+CS Annual Precip.+CS Precip. Seasonality+Elevation+Tarsus Length+Migratory Distance+Landscape Ruggedness	<0.001	0.332	268.714	0.479	0.065
Mean Crown Age.climate.stability	CS_bio_12	Mean Crown Age ~ Prop. Range Size Sampled+Range Size+CS Annual Temp.+CS Temp. Seasonality+CS Precip. Seasonality+Elevation+Tarsus Length+Hand Wing Index+Migratory Distance+Landscape Ruggedness	<0.001	0.338	268.724	0.489	0.065
Mean Crown Age.climate.stability	Landscape Ruggedness	Mean Crown Age ~ Prop. Range Size Sampled+Range Size+CS Annual Temp.+CS Temp. Seasonality+CS Annual Precip.+CS Precip. Seasonality+Elevation+Tarsus Length+Hand Wing Index+Migratory Distance	<0.001	0.327	270.491	2.256	0.027
Mean Crown Age.climate.stability	Prop. Range Size Sampled	Mean Crown Age ~ Range Size+CS Annual Temp.+CS Temp. Seasonality+CS Annual Precip.+CS Precip. Seasonality+Elevation+Tarsus Length+Hand Wing Index+Migratory Distance+Landscape Ruggedness	<0.001	0.323	272.533	4.297	0.01
Mean Crown Age.climate.stability	CS_bio_01	Mean Crown Age ~ Prop. Range Size Sampled+Range Size+CS Temp. Seasonality+CS Annual Precip.+CS Precip. Seasonality+Elevation+Tarsus Length+Hand Wing Index+Migratory Distance+Landscape Ruggedness	<0.001	0.272	282.853	14.618	0
Mean Crown Age.climate.stability	Range Size	Mean Crown Age ~ Prop. Range Size Sampled+CS Annual Temp.+CS Temp. Seasonality+CS Annual Precip.+CS Precip. Seasonality+Elevation+Tarsus Length+Hand Wing Index+Migratory Distance+Landscape Ruggedness	<0.001	0.152	316.748	48.513	0
Mean Crown Age.latitude	Migratory Distance	Mean Crown Age ~ Prop. Range Size Sampled+Range Size+Latitude Mid.+Elevation+Tarsus Length+Hand Wing Index+Landscape Ruggedness	<0.001	0.409	246.789	-2.153	0.24
Mean Crown Age.latitude	Tarsus Length	Mean Crown Age ~ Prop. Range Size Sampled+Range Size+Latitude Mid.+Elevation+Hand Wing Index+Migratory Distance+Landscape Ruggedness	<0.001	0.408	246.989	-1.953	0.217
Mean Crown Age.latitude	Elevation	Mean Crown Age ~ Prop. Range Size Sampled+Range Size+Latitude Mid.+Tarsus Length+Hand Wing Index+Migratory Distance+Landscape Ruggedness	<0.001	0.408	247.139	-1.803	0.202
Mean Crown Age.latitude	Landscape Ruggedness	Mean Crown Age ~ Prop. Range Size Sampled+Range Size+Latitude Mid.+Elevation+Tarsus Length+Hand Wing Index+Migratory Distance	<0.001	0.402	248.414	-0.529	0.107
Mean Crown Age.latitude	Hand Wing Index	Mean Crown Age ~ Prop. Range Size Sampled+Range Size+Latitude Mid.+Elevation+Tarsus Length+Migratory Distance+Landscape Ruggedness	<0.001	0.402	248.766	-0.177	0.089
Mean Crown Age.latitude	Full Model	Mean Crown Age ~ Prop. Range Size Sampled+Range Size+Latitude Mid.+Elevation+Tarsus Length+Hand Wing Index+Migratory Distance+Landscape Ruggedness	<0.001	0.406	248.942	0	0.082
Mean Crown Age.latitude	Prop. Range Size Sampled	Mean Crown Age ~ Range Size+Latitude Mid.+Elevation+Tarsus Length+Hand Wing Index+Migratory Distance+Landscape Ruggedness	<0.001	0.401	249.478	0.536	0.063
Mean Crown Age.latitude	Latitude Mid.	Mean Crown Age ~ Prop. Range Size Sampled+Range Size+Elevation+Tarsus Length+Hand Wing Index+Migratory Distance+Landscape Ruggedness	<0.001	0.255	289.147	40.204	0
Mean Crown Age.latitude	Range Size	Mean Crown Age ~ Prop. Range Size Sampled+Latitude Mid.+Elevation+Tarsus Length+Hand Wing Index+Migratory Distance+Landscape Ruggedness	<0.001	0.206	303.817	54.875	0
Mean Crown Age.climate.breadth	Elevation	Mean Crown Age ~ Prop. Range Size Sampled+Range Size+Annual Temp. Range+Temp. Seasonality Range+Annual Precip.+Precip. Seasonality+Tarsus Length+Hand Wing Index+Migratory Distance+Landscape Ruggedness	<0.001	0.391	254.369	-2.18	0.17
Mean Crown Age.climate.breadth	Migratory Distance	Mean Crown Age ~ Prop. Range Size Sampled+Range Size+Annual Temp. Range+Temp. Seasonality Range+Annual Precip.+Precip. Seasonality+Elevational Range+Tarsus Length+Hand Wing Index+Landscape Ruggedness	<0.001	0.391	254.438	-2.111	0.164
Mean Crown Age.climate.breadth	RANGE.bio4	Mean Crown Age ~ Prop. Range Size Sampled+Range Size+Annual Temp. Range+Annual Precip.+Precip. Seasonality+Elevational Range+Tarsus Length+Hand Wing Index+Migratory Distance+Landscape Ruggedness	<0.001	0.39	254.671	-1.879	0.146
Mean Crown Age.climate.breadth	RANGE.bio1	Mean Crown Age ~ Prop. Range Size Sampled+Range Size+Temp. Seasonality Range+Annual Precip.+Precip. Seasonality+Elevational Range+Tarsus Length+Hand Wing Index+Migratory Distance+Landscape Ruggedness	<0.001	0.392	254.708	-1.841	0.143
Mean Crown Age.climate.breadth	Tarsus Length	Mean Crown Age ~ Prop. Range Size Sampled+Range Size+Annual Temp. Range+Temp. Seasonality Range+Annual Precip.+Precip. Seasonality+Elevational Range+Hand Wing Index+Migratory Distance+Landscape Ruggedness	<0.001	0.391	254.899	-1.65	0.13
Mean Crown Age.climate.breadth	RANGE.bio15	Mean Crown Age ~ Prop. Range Size Sampled+Range Size+Annual Temp. Range+Temp. Seasonality Range+Annual Precip.+Elevational Range+Tarsus Length+Hand Wing Index+Migratory Distance+Landscape Ruggedness	<0.001	0.392	254.982	-1.568	0.125
Mean Crown Age.climate.breadth	Full Model	Mean Crown Age ~ Prop. Range Size Sampled+Range Size+Annual Temp. Range+Temp. Seasonality Range+Annual Precip.+Precip. Seasonality+Elevational Range+Tarsus Length+Hand Wing Index+Migratory Distance+Landscape Ruggedness	<0.001	0.389	256.55	0	0.057
Mean Crown Age.climate.breadth	Landscape Ruggedness	Mean Crown Age ~ Prop. Range Size Sampled+Range Size+Annual Temp. Range+Temp. Seasonality Range+Annual Precip.+Precip. Seasonality+Elevational Range+Tarsus Length+Hand Wing Index+Migratory Distance	<0.001	0.381	257.671	1.121	0.033
Mean Crown Age.climate.breadth	Hand Wing Index	Mean Crown Age ~ Prop. Range Size Sampled+Range Size+Annual Temp. Range+Temp. Seasonality Range+Annual Precip.+Precip. Seasonality+Elevational Range+Tarsus Length+Migratory Distance+Landscape Ruggedness	<0.001	0.373	258.8	2.25	0.019
Mean Crown Age.climate.breadth	Prop. Range Size Sampled	Mean Crown Age ~ Range Size+Annual Temp. Range+Temp. Seasonality Range+Annual Precip.+Precip. Seasonality+Elevational Range+Tarsus Length+Hand Wing Index+Migratory Distance+Landscape Ruggedness	<0.001	0.377	259.337	2.788	0.014
Mean Crown Age.climate.breadth	Range Size	Mean Crown Age ~ Prop. Range Size Sampled+Annual Temp. Range+Temp. Seasonality Range+Annual Precip.+Precip. Seasonality+Elevational Range+Tarsus Length+Hand Wing Index+Migratory Distance+Landscape Ruggedness	<0.001	0.273	287.756	31.206	0
Mean Crown Age.climate.breadth	RANGE.bio12	Mean Crown Age ~ Prop. Range Size Sampled+Range Size+Annual Temp. Range+Temp. Seasonality Range+Precip. Seasonality+Elevational Range+Tarsus Length+Hand Wing Index+Migratory Distance+Landscape Ruggedness	<0.001	0.268	289.248	32.699	0
Mean Crown Age.NPP	Migratory Distance	Mean Crown Age ~ Prop. Range Size Sampled+Range Size+NPP+Elevation+Tarsus Length+Hand Wing Index+Landscape Ruggedness	<0.001	0.379	255.284	-2.058	0.301
Mean Crown Age.NPP	Tarsus Length	Mean Crown Age ~ Prop. Range Size Sampled+Range Size+NPP+Elevation+Hand Wing Index+Migratory Distance+Landscape Ruggedness	<0.001	0.379	255.341	-2	0.293
Mean Crown Age.NPP	Landscape Ruggedness	Mean Crown Age ~ Prop. Range Size Sampled+Range Size+NPP+Elevation+Tarsus Length+Hand Wing Index+Migratory Distance	<0.001	0.372	257.184	-0.158	0.117
Mean Crown Age.NPP	Elevation	Mean Crown Age ~ Prop. Range Size Sampled+Range Size+NPP+Tarsus Length+Hand Wing Index+Migratory Distance+Landscape Ruggedness	<0.001	0.373	257.194	-0.148	0.116
Mean Crown Age.NPP	Full Model	Mean Crown Age ~ Prop. Range Size Sampled+Range Size+NPP+Elevation+Tarsus Length+Hand Wing Index+Migratory Distance+Landscape Ruggedness	<0.001	0.376	257.341	0	0.108
Mean Crown Age.NPP	Hand Wing Index	Mean Crown Age ~ Prop. Range Size Sampled+Range Size+NPP+Elevation+Tarsus Length+Migratory Distance+Landscape Ruggedness	<0.001	0.364	258.676	1.334	0.055
Mean Crown Age.NPP	Prop. Range Size Sampled	Mean Crown Age ~ Range Size+NPP+Elevation+Tarsus Length+Hand Wing Index+Migratory Distance+Landscape Ruggedness	<0.001	0.358	262.131	4.789	0.01
Mean Crown Age.NPP	NPP	Mean Crown Age ~ Prop. Range Size Sampled+Range Size+Elevation+Tarsus Length+Hand Wing Index+Migratory Distance+Landscape Ruggedness	<0.001	0.255	289.147	31.805	0
Mean Crown Age.NPP	Range Size	Mean Crown Age ~ Prop. Range Size Sampled+NPP+Elevation+Tarsus Length+Hand Wing Index+Migratory Distance+Landscape Ruggedness	<0.001	0.218	299.925	42.583	0
Mean Crown Age.pc1	Tarsus Length	Mean Crown Age ~ Prop. Range Size Sampled+Range Size+Bioclim PC1+Elevation+Hand Wing Index+Migratory Distance+Landscape Ruggedness	<0.001	0.39	251.261	-2.101	0.437
Mean Crown Age.pc1	Migratory Distance	Mean Crown Age ~ Prop. Range Size Sampled+Range Size+Bioclim PC1+Elevation+Tarsus Length+Hand Wing Index+Landscape Ruggedness	<0.001	0.384	252.882	-0.48	0.194
Mean Crown Age.pc1	Full Model	Mean Crown Age ~ Prop. Range Size Sampled+Range Size+Bioclim PC1+Elevation+Tarsus Length+Hand Wing Index+Migratory Distance+Landscape Ruggedness	<0.001	0.387	253.362	0	0.153
Mean Crown Age.pc1	Hand Wing Index	Mean Crown Age ~ Prop. Range Size Sampled+Range Size+Bioclim PC1+Elevation+Tarsus Length+Migratory Distance+Landscape Ruggedness	<0.001	0.378	254.324	0.962	0.094
Mean Crown Age.pc1	Landscape Ruggedness	Mean Crown Age ~ Prop. Range Size Sampled+Range Size+Bioclim PC1+Elevation+Tarsus Length+Hand Wing Index+Migratory Distance	<0.001	0.379	254.499	1.136	0.086
Mean Crown Age.pc1	Prop. Range Size Sampled	Mean Crown Age ~ Range Size+Bioclim PC1+Elevation+Tarsus Length+Hand Wing Index+Migratory Distance+Landscape Ruggedness	<0.001	0.374	256.569	3.207	0.031
Mean Crown Age.pc1	Elevation	Mean Crown Age ~ Prop. Range Size Sampled+Range Size+Bioclim PC1+Tarsus Length+Hand Wing Index+Migratory Distance+Landscape Ruggedness	<0.001	0.36	260.162	6.799	0.005
Mean Crown Age.pc1	Bioclim PC1	Mean Crown Age ~ Prop. Range Size Sampled+Range Size+Elevation+Tarsus Length+Hand Wing Index+Migratory Distance+Landscape Ruggedness	<0.001	0.256	288.583	35.22	0
Mean Crown Age.pc1	Range Size	Mean Crown Age ~ Prop. Range Size Sampled+Bioclim PC1+Elevation+Tarsus Length+Hand Wing Index+Migratory Distance+Landscape Ruggedness	<0.001	0.15	315.71	62.348	0
crown.rate.climate.breadth	RANGE.bio15	Crown Splitting Rate (0.9) ~ Prop. Range Size Sampled+Range Size+Annual Temp. Range+Temp. Seasonality Range+Annual Precip.+Elevational Range+Tarsus Length+Hand Wing Index+Migratory Distance+Landscape Ruggedness	0.123	0.026	252.545	-2.241	0.136
crown.rate.climate.breadth	Hand Wing Index	Crown Splitting Rate (0.9) ~ Prop. Range Size Sampled+Range Size+Annual Temp. Range+Temp. Seasonality Range+Annual Precip.+Precip. Seasonality+Elevational Range+Tarsus Length+Migratory Distance+Landscape Ruggedness	0.124	0.026	252.57	-2.216	0.135
crown.rate.climate.breadth	RANGE.bio4	Crown Splitting Rate (0.9) ~ Prop. Range Size Sampled+Range Size+Annual Temp. Range+Annual Precip.+Precip. Seasonality+Elevational Range+Tarsus Length+Hand Wing Index+Migratory Distance+Landscape Ruggedness	0.127	0.025	252.627	-2.159	0.131
crown.rate.climate.breadth	Migratory Distance	Crown Splitting Rate (0.9) ~ Prop. Range Size Sampled+Range Size+Annual Temp. Range+Temp. Seasonality Range+Annual Precip.+Precip. Seasonality+Elevational Range+Tarsus Length+Hand Wing Index+Landscape Ruggedness	0.136	0.024	252.897	-1.889	0.114
crown.rate.climate.breadth	Landscape Ruggedness	Crown Splitting Rate (0.9) ~ Prop. Range Size Sampled+Range Size+Annual Temp. Range+Temp. Seasonality Range+Annual Precip.+Precip. Seasonality+Elevational Range+Tarsus Length+Hand Wing Index+Migratory Distance	0.136	0.024	252.938	-1.848	0.112
crown.rate.climate.breadth	Range Size	Crown Splitting Rate (0.9) ~ Prop. Range Size Sampled+Annual Temp. Range+Temp. Seasonality Range+Annual Precip.+Precip. Seasonality+Elevational Range+Tarsus Length+Hand Wing Index+Migratory Distance+Landscape Ruggedness	0.148	0.023	253.244	-1.542	0.096
crown.rate.climate.breadth	RANGE.bio12	Crown Splitting Rate (0.9) ~ Prop. Range Size Sampled+Range Size+Annual Temp. Range+Temp. Seasonality Range+Precip. Seasonality+Elevational Range+Tarsus Length+Hand Wing Index+Migratory Distance+Landscape Ruggedness	0.157	0.022	253.464	-1.322	0.086
crown.rate.climate.breadth	Elevation	Crown Splitting Rate (0.9) ~ Prop. Range Size Sampled+Range Size+Annual Temp. Range+Temp. Seasonality Range+Annual Precip.+Precip. Seasonality+Tarsus Length+Hand Wing Index+Migratory Distance+Landscape Ruggedness	0.171	0.02	253.758	-1.028	0.074
crown.rate.climate.breadth	Full Model	Crown Splitting Rate (0.9) ~ Prop. Range Size Sampled+Range Size+Annual Temp. Range+Temp. Seasonality Range+Annual Precip.+Precip. Seasonality+Elevational Range+Tarsus Length+Hand Wing Index+Migratory Distance+Landscape Ruggedness	0.172	0.021	254.786	0	0.044
crown.rate.climate.breadth	RANGE.bio1	Crown Splitting Rate (0.9) ~ Prop. Range Size Sampled+Range Size+Temp. Seasonality Range+Annual Precip.+Precip. Seasonality+Elevational Range+Tarsus Length+Hand Wing Index+Migratory Distance+Landscape Ruggedness	0.232	0.014	255.013	0.227	0.04
crown.rate.climate.breadth	Tarsus Length	Crown Splitting Rate (0.9) ~ Prop. Range Size Sampled+Range Size+Annual Temp. Range+Temp. Seasonality Range+Annual Precip.+Precip. Seasonality+Elevational Range+Hand Wing Index+Migratory Distance+Landscape Ruggedness	0.272	0.011	255.764	0.978	0.027
crown.rate.climate.breadth	Prop. Range Size Sampled	Crown Splitting Rate (0.9) ~ Range Size+Annual Temp. Range+Temp. Seasonality Range+Annual Precip.+Precip. Seasonality+Elevational Range+Tarsus Length+Hand Wing Index+Migratory Distance+Landscape Ruggedness	0.626	-0.01	260.201	5.415	0.003
crown.rate.climate.stability	Hand Wing Index	Crown Splitting Rate (0.9) ~ Prop. Range Size Sampled+Range Size+CS Annual Temp.+CS Temp. Seasonality+CS Annual Precip.+CS Precip. Seasonality+Elevation+Tarsus Length+Migratory Distance+Landscape Ruggedness	0.092	0.031	252.067	-2.386	0.136
crown.rate.climate.stability	CS_bio_15	Crown Splitting Rate (0.9) ~ Prop. Range Size Sampled+Range Size+CS Annual Temp.+CS Temp. Seasonality+CS Annual Precip.+Elevation+Tarsus Length+Hand Wing Index+Migratory Distance+Landscape Ruggedness	0.097	0.03	252.076	-2.377	0.135
crown.rate.climate.stability	CS_bio_12	Crown Splitting Rate (0.9) ~ Prop. Range Size Sampled+Range Size+CS Annual Temp.+CS Temp. Seasonality+CS Precip. Seasonality+Elevation+Tarsus Length+Hand Wing Index+Migratory Distance+Landscape Ruggedness	0.097	0.03	252.125	-2.328	0.132
crown.rate.climate.stability	Landscape Ruggedness	Crown Splitting Rate (0.9) ~ Prop. Range Size Sampled+Range Size+CS Annual Temp.+CS Temp. Seasonality+CS Annual Precip.+CS Precip. Seasonality+Elevation+Tarsus Length+Hand Wing Index+Migratory Distance	0.067	0.036	252.217	-2.236	0.126
crown.rate.climate.stability	Migratory Distance	Crown Splitting Rate (0.9) ~ Prop. Range Size Sampled+Range Size+CS Annual Temp.+CS Temp. Seasonality+CS Annual Precip.+CS Precip. Seasonality+Elevation+Tarsus Length+Hand Wing Index+Landscape Ruggedness	0.073	0.035	252.514	-1.939	0.109
crown.rate.climate.stability	CS_bio_04	Crown Splitting Rate (0.9) ~ Prop. Range Size Sampled+Range Size+CS Annual Temp.+CS Annual Precip.+CS Precip. Seasonality+Elevation+Tarsus Length+Hand Wing Index+Migratory Distance+Landscape Ruggedness	0.112	0.027	252.549	-1.904	0.107
crown.rate.climate.stability	CS_bio_01	Crown Splitting Rate (0.9) ~ Prop. Range Size Sampled+Range Size+CS Temp. Seasonality+CS Annual Precip.+CS Precip. Seasonality+Elevation+Tarsus Length+Hand Wing Index+Migratory Distance+Landscape Ruggedness	0.142	0.023	253.313	-1.14	0.073
crown.rate.climate.stability	Elevation	Crown Splitting Rate (0.9) ~ Prop. Range Size Sampled+Range Size+CS Annual Temp.+CS Temp. Seasonality+CS Annual Precip.+CS Precip. Seasonality+Tarsus Length+Hand Wing Index+Migratory Distance+Landscape Ruggedness	0.161	0.021	253.773	-0.679	0.058
crown.rate.climate.stability	Tarsus Length	Crown Splitting Rate (0.9) ~ Prop. Range Size Sampled+Range Size+CS Annual Temp.+CS Temp. Seasonality+CS Annual Precip.+CS Precip. Seasonality+Elevation+Hand Wing Index+Migratory Distance+Landscape Ruggedness	0.112	0.028	254.03	-0.423	0.051
crown.rate.climate.stability	Full Model	Crown Splitting Rate (0.9) ~ Prop. Range Size Sampled+Range Size+CS Annual Temp.+CS Temp. Seasonality+CS Annual Precip.+CS Precip. Seasonality+Elevation+Tarsus Length+Hand Wing Index+Migratory Distance+Landscape Ruggedness	0.099	0.031	254.453	0	0.041
crown.rate.climate.stability	Range Size	Crown Splitting Rate (0.9) ~ Prop. Range Size Sampled+CS Annual Temp.+CS Temp. Seasonality+CS Annual Precip.+CS Precip. Seasonality+Elevation+Tarsus Length+Hand Wing Index+Migratory Distance+Landscape Ruggedness	0.148	0.023	255.092	0.639	0.03
crown.rate.climate.stability	Prop. Range Size Sampled	Crown Splitting Rate (0.9) ~ Range Size+CS Annual Temp.+CS Temp. Seasonality+CS Annual Precip.+CS Precip. Seasonality+Elevation+Tarsus Length+Hand Wing Index+Migratory Distance+Landscape Ruggedness	0.562	-0.006	259.458	5.005	0.003
crown.rate.lat	Migratory Distance	Crown Splitting Rate (0.9) ~ Prop. Range Size Sampled+Range Size+Latitude Mid.+Elevation+Tarsus Length+Hand Wing Index+Landscape Ruggedness	0.04	0.037	246.95	-2.159	0.201
crown.rate.lat	Hand Wing Index	Crown Splitting Rate (0.9) ~ Prop. Range Size Sampled+Range Size+Latitude Mid.+Elevation+Tarsus Length+Migratory Distance+Landscape Ruggedness	0.04	0.037	246.959	-2.15	0.2
crown.rate.lat	Landscape Ruggedness	Crown Splitting Rate (0.9) ~ Prop. Range Size Sampled+Range Size+Latitude Mid.+Elevation+Tarsus Length+Hand Wing Index+Migratory Distance	0.042	0.037	247.041	-2.069	0.192
crown.rate.lat	Latitude Mid.	Crown Splitting Rate (0.9) ~ Prop. Range Size Sampled+Range Size+Elevation+Tarsus Length+Hand Wing Index+Migratory Distance+Landscape Ruggedness	0.064	0.031	248.183	-0.927	0.108
crown.rate.lat	Tarsus Length	Crown Splitting Rate (0.9) ~ Prop. Range Size Sampled+Range Size+Latitude Mid.+Elevation+Hand Wing Index+Migratory Distance+Landscape Ruggedness	0.075	0.029	248.812	-0.297	0.079
crown.rate.lat	Elevation	Crown Splitting Rate (0.9) ~ Prop. Range Size Sampled+Range Size+Latitude Mid.+Tarsus Length+Hand Wing Index+Migratory Distance+Landscape Ruggedness	0.079	0.028	248.821	-0.288	0.079
crown.rate.lat	Full Model	Crown Splitting Rate (0.9) ~ Prop. Range Size Sampled+Range Size+Latitude Mid.+Elevation+Tarsus Length+Hand Wing Index+Migratory Distance+Landscape Ruggedness	0.066	0.032	249.109	0	0.068
crown.rate.lat	Range Size	Crown Splitting Rate (0.9) ~ Prop. Range Size Sampled+Latitude Mid.+Elevation+Tarsus Length+Hand Wing Index+Migratory Distance+Landscape Ruggedness	0.079	0.028	249.127	0.018	0.068
crown.rate.lat	Prop. Range Size Sampled	Crown Splitting Rate (0.9) ~ Range Size+Latitude Mid.+Elevation+Tarsus Length+Hand Wing Index+Migratory Distance+Landscape Ruggedness	0.336	0.005	253.728	4.619	0.007
crown.rate.NPP	Hand Wing Index	Crown Splitting Rate (0.9) ~ Prop. Range Size Sampled+Range Size+NPP+Elevation+Tarsus Length+Migratory Distance+Landscape Ruggedness	0.019	0.047	246.296	-2.159	0.208
crown.rate.NPP	Migratory Distance	Crown Splitting Rate (0.9) ~ Prop. Range Size Sampled+Range Size+NPP+Elevation+Tarsus Length+Hand Wing Index+Landscape Ruggedness	0.02	0.047	246.415	-2.04	0.196
crown.rate.NPP	Landscape Ruggedness	Crown Splitting Rate (0.9) ~ Prop. Range Size Sampled+Range Size+NPP+Elevation+Tarsus Length+Hand Wing Index+Migratory Distance	0.02	0.046	246.47	-1.986	0.191
crown.rate.NPP	Range Size	Crown Splitting Rate (0.9) ~ Prop. Range Size Sampled+NPP+Elevation+Tarsus Length+Hand Wing Index+Migratory Distance+Landscape Ruggedness	0.03	0.041	247.602	-0.853	0.108
crown.rate.NPP	NPP	Crown Splitting Rate (0.9) ~ Prop. Range Size Sampled+Range Size+Elevation+Tarsus Length+Hand Wing Index+Migratory Distance+Landscape Ruggedness	0.067	0.03	248.097	-0.358	0.085
crown.rate.NPP	Full Model	Crown Splitting Rate (0.9) ~ Prop. Range Size Sampled+Range Size+NPP+Elevation+Tarsus Length+Hand Wing Index+Migratory Distance+Landscape Ruggedness	0.032	0.043	248.455	0	0.071
crown.rate.NPP	Tarsus Length	Crown Splitting Rate (0.9) ~ Prop. Range Size Sampled+Range Size+NPP+Elevation+Hand Wing Index+Migratory Distance+Landscape Ruggedness	0.041	0.037	248.512	0.057	0.069
crown.rate.NPP	Elevation	Crown Splitting Rate (0.9) ~ Prop. Range Size Sampled+Range Size+NPP+Tarsus Length+Hand Wing Index+Migratory Distance+Landscape Ruggedness	0.074	0.029	248.528	0.073	0.068
crown.rate.NPP	Prop. Range Size Sampled	Crown Splitting Rate (0.9) ~ Range Size+NPP+Elevation+Tarsus Length+Hand Wing Index+Migratory Distance+Landscape Ruggedness	0.4	0.002	254.207	5.752	0.004
crown.rate.pc1	Hand Wing Index	Crown Splitting Rate (0.9) ~ Prop. Range Size Sampled+Range Size+Bioclim PC1+Elevation+Tarsus Length+Migratory Distance+Landscape Ruggedness	0.049	0.035	247.548	-2.139	0.197
crown.rate.pc1	Landscape Ruggedness	Crown Splitting Rate (0.9) ~ Prop. Range Size Sampled+Range Size+Bioclim PC1+Elevation+Tarsus Length+Hand Wing Index+Migratory Distance	0.05	0.034	247.555	-2.131	0.196
crown.rate.pc1	Migratory Distance	Crown Splitting Rate (0.9) ~ Prop. Range Size Sampled+Range Size+Bioclim PC1+Elevation+Tarsus Length+Hand Wing Index+Landscape Ruggedness	0.05	0.034	247.586	-2.1	0.193
crown.rate.pc1	Bioclim PC1	Crown Splitting Rate (0.9) ~ Prop. Range Size Sampled+Range Size+Elevation+Tarsus Length+Hand Wing Index+Migratory Distance+Landscape Ruggedness	0.066	0.031	248.218	-1.469	0.141
crown.rate.pc1	Tarsus Length	Crown Splitting Rate (0.9) ~ Prop. Range Size Sampled+Range Size+Bioclim PC1+Elevation+Hand Wing Index+Migratory Distance+Landscape Ruggedness	0.087	0.026	249.27	-0.416	0.083
crown.rate.pc1	Full Model	Crown Splitting Rate (0.9) ~ Prop. Range Size Sampled+Range Size+Bioclim PC1+Elevation+Tarsus Length+Hand Wing Index+Migratory Distance+Landscape Ruggedness	0.08	0.03	249.687	0	0.068
crown.rate.pc1	Elevation	Crown Splitting Rate (0.9) ~ Prop. Range Size Sampled+Range Size+Bioclim PC1+Tarsus Length+Hand Wing Index+Migratory Distance+Landscape Ruggedness	0.115	0.022	249.955	0.268	0.059
crown.rate.pc1	Range Size	Crown Splitting Rate (0.9) ~ Prop. Range Size Sampled+Bioclim PC1+Elevation+Tarsus Length+Hand Wing Index+Migratory Distance+Landscape Ruggedness	0.108	0.023	250.002	0.315	0.058
crown.rate.pc1	Prop. Range Size Sampled	Crown Splitting Rate (0.9) ~ Range Size+Bioclim PC1+Elevation+Tarsus Length+Hand Wing Index+Migratory Distance+Landscape Ruggedness	0.443	-0.001	254.8	5.113	0.005
phylog.struct.crown.climate.breadth	Migratory Distance	Phylogeographic Structure (0.9) ~ Mean Crown Age+Prop. Range Size Sampled+Range Size+Annual Temp. Range+Temp. Seasonality Range+Annual Precip.+Precip. Seasonality+Elevational Range+Tarsus Length+Hand Wing Index+Landscape Ruggedness	<0.001	0.471	236.857	-2.238	0.138
phylog.struct.crown.climate.breadth	Hand Wing Index	Phylogeographic Structure (0.9) ~ Mean Crown Age+Prop. Range Size Sampled+Range Size+Annual Temp. Range+Temp. Seasonality Range+Annual Precip.+Precip. Seasonality+Elevational Range+Tarsus Length+Migratory Distance+Landscape Ruggedness	<0.001	0.471	236.864	-2.23	0.137
phylog.struct.crown.climate.breadth	Elevation	Phylogeographic Structure (0.9) ~ Mean Crown Age+Prop. Range Size Sampled+Range Size+Annual Temp. Range+Temp. Seasonality Range+Annual Precip.+Precip. Seasonality+Tarsus Length+Hand Wing Index+Migratory Distance+Landscape Ruggedness	<0.001	0.471	236.939	-2.156	0.132
phylog.struct.crown.climate.breadth	RANGE.bio4	Phylogeographic Structure (0.9) ~ Mean Crown Age+Prop. Range Size Sampled+Range Size+Annual Temp. Range+Annual Precip.+Precip. Seasonality+Elevational Range+Tarsus Length+Hand Wing Index+Migratory Distance+Landscape Ruggedness	<0.001	0.47	237.244	-1.851	0.114
phylog.struct.crown.climate.breadth	Tarsus Length	Phylogeographic Structure (0.9) ~ Mean Crown Age+Prop. Range Size Sampled+Range Size+Annual Temp. Range+Temp. Seasonality Range+Annual Precip.+Precip. Seasonality+Elevational Range+Hand Wing Index+Migratory Distance+Landscape Ruggedness	<0.001	0.47	237.424	-1.671	0.104
phylog.struct.crown.climate.breadth	RANGE.bio12	Phylogeographic Structure (0.9) ~ Mean Crown Age+Prop. Range Size Sampled+Range Size+Annual Temp. Range+Temp. Seasonality Range+Precip. Seasonality+Elevational Range+Tarsus Length+Hand Wing Index+Migratory Distance+Landscape Ruggedness	<0.001	0.468	238.129	-0.966	0.073
phylog.struct.crown.climate.breadth	RANGE.bio15	Phylogeographic Structure (0.9) ~ Mean Crown Age+Prop. Range Size Sampled+Range Size+Annual Temp. Range+Temp. Seasonality Range+Annual Precip.+Elevational Range+Tarsus Length+Hand Wing Index+Migratory Distance+Landscape Ruggedness	<0.001	0.468	238.139	-0.956	0.073
phylog.struct.crown.climate.breadth	Landscape Ruggedness	Phylogeographic Structure (0.9) ~ Mean Crown Age+Prop. Range Size Sampled+Range Size+Annual Temp. Range+Temp. Seasonality Range+Annual Precip.+Precip. Seasonality+Elevational Range+Tarsus Length+Hand Wing Index+Migratory Distance	<0.001	0.468	238.219	-0.876	0.07
phylog.struct.crown.climate.breadth	Range Size	Phylogeographic Structure (0.9) ~ Mean Crown Age+Prop. Range Size Sampled+Annual Temp. Range+Temp. Seasonality Range+Annual Precip.+Precip. Seasonality+Elevational Range+Tarsus Length+Hand Wing Index+Migratory Distance+Landscape Ruggedness	<0.001	0.466	238.738	-0.357	0.054
phylog.struct.crown.climate.breadth	Full Model	Phylogeographic Structure (0.9) ~ Mean Crown Age+Prop. Range Size Sampled+Range Size+Annual Temp. Range+Temp. Seasonality Range+Annual Precip.+Precip. Seasonality+Elevational Range+Tarsus Length+Hand Wing Index+Migratory Distance+Landscape Ruggedness	<0.001	0.468	239.095	0	0.045
phylog.struct.crown.climate.breadth	RANGE.bio1	Phylogeographic Structure (0.9) ~ Mean Crown Age+Prop. Range Size Sampled+Range Size+Temp. Seasonality Range+Annual Precip.+Precip. Seasonality+Elevational Range+Tarsus Length+Hand Wing Index+Migratory Distance+Landscape Ruggedness	<0.001	0.465	239.143	0.048	0.044
phylog.struct.crown.climate.breadth	Prop. Range Size Sampled	Phylogeographic Structure (0.9) ~ Mean Crown Age+Range Size+Annual Temp. Range+Temp. Seasonality Range+Annual Precip.+Precip. Seasonality+Elevational Range+Tarsus Length+Hand Wing Index+Migratory Distance+Landscape Ruggedness	<0.001	0.46	241.032	1.937	0.017
phylog.struct.crown.climate.breadth	Age	Phylogeographic Structure (0.9) ~ Prop. Range Size Sampled+Range Size+Annual Temp. Range+Temp. Seasonality Range+Annual Precip.+Precip. Seasonality+Elevational Range+Tarsus Length+Hand Wing Index+Migratory Distance+Landscape Ruggedness	<0.001	0.253	309.012	69.917	0
phylog.struct.crown.climate.stability	Hand Wing Index	Phylogeographic Structure (0.9) ~ Mean Crown Age+Prop. Range Size Sampled+Range Size+CS Annual Temp.+CS Temp. Seasonality+CS Annual Precip.+CS Precip. Seasonality+Elevation+Tarsus Length+Migratory Distance+Landscape Ruggedness	<0.001	0.456	242.776	-2.275	0.117
phylog.struct.crown.climate.stability	Tarsus Length	Phylogeographic Structure (0.9) ~ Mean Crown Age+Prop. Range Size Sampled+Range Size+CS Annual Temp.+CS Temp. Seasonality+CS Annual Precip.+CS Precip. Seasonality+Elevation+Hand Wing Index+Migratory Distance+Landscape Ruggedness	<0.001	0.456	242.779	-2.272	0.117
phylog.struct.crown.climate.stability	Elevation	Phylogeographic Structure (0.9) ~ Mean Crown Age+Prop. Range Size Sampled+Range Size+CS Annual Temp.+CS Temp. Seasonality+CS Annual Precip.+CS Precip. Seasonality+Tarsus Length+Hand Wing Index+Migratory Distance+Landscape Ruggedness	<0.001	0.456	242.782	-2.268	0.117
phylog.struct.crown.climate.stability	Migratory Distance	Phylogeographic Structure (0.9) ~ Mean Crown Age+Prop. Range Size Sampled+Range Size+CS Annual Temp.+CS Temp. Seasonality+CS Annual Precip.+CS Precip. Seasonality+Elevation+Tarsus Length+Hand Wing Index+Landscape Ruggedness	<0.001	0.456	242.817	-2.234	0.115
phylog.struct.crown.climate.stability	CS_bio_12	Phylogeographic Structure (0.9) ~ Mean Crown Age+Prop. Range Size Sampled+Range Size+CS Annual Temp.+CS Temp. Seasonality+CS Precip. Seasonality+Elevation+Tarsus Length+Hand Wing Index+Migratory Distance+Landscape Ruggedness	<0.001	0.456	242.845	-2.206	0.113
phylog.struct.crown.climate.stability	CS_bio_15	Phylogeographic Structure (0.9) ~ Mean Crown Age+Prop. Range Size Sampled+Range Size+CS Annual Temp.+CS Temp. Seasonality+CS Annual Precip.+Elevation+Tarsus Length+Hand Wing Index+Migratory Distance+Landscape Ruggedness	<0.001	0.454	243.292	-1.759	0.091
phylog.struct.crown.climate.stability	CS_bio_01	Phylogeographic Structure (0.9) ~ Mean Crown Age+Prop. Range Size Sampled+Range Size+CS Temp. Seasonality+CS Annual Precip.+CS Precip. Seasonality+Elevation+Tarsus Length+Hand Wing Index+Migratory Distance+Landscape Ruggedness	<0.001	0.454	243.393	-1.657	0.086
phylog.struct.crown.climate.stability	CS_bio_04	Phylogeographic Structure (0.9) ~ Mean Crown Age+Prop. Range Size Sampled+Range Size+CS Annual Temp.+CS Annual Precip.+CS Precip. Seasonality+Elevation+Tarsus Length+Hand Wing Index+Migratory Distance+Landscape Ruggedness	<0.001	0.453	243.689	-1.362	0.074
phylog.struct.crown.climate.stability	Landscape Ruggedness	Phylogeographic Structure (0.9) ~ Mean Crown Age+Prop. Range Size Sampled+Range Size+CS Annual Temp.+CS Temp. Seasonality+CS Annual Precip.+CS Precip. Seasonality+Elevation+Tarsus Length+Hand Wing Index+Migratory Distance	<0.001	0.453	243.818	-1.232	0.07
phylog.struct.crown.climate.stability	Range Size	Phylogeographic Structure (0.9) ~ Mean Crown Age+Prop. Range Size Sampled+CS Annual Temp.+CS Temp. Seasonality+CS Annual Precip.+CS Precip. Seasonality+Elevation+Tarsus Length+Hand Wing Index+Migratory Distance+Landscape Ruggedness	<0.001	0.451	244.533	-0.518	0.049
phylog.struct.crown.climate.stability	Full Model	Phylogeographic Structure (0.9) ~ Mean Crown Age+Prop. Range Size Sampled+Range Size+CS Annual Temp.+CS Temp. Seasonality+CS Annual Precip.+CS Precip. Seasonality+Elevation+Tarsus Length+Hand Wing Index+Migratory Distance+Landscape Ruggedness	<0.001	0.453	245.051	0	0.038
phylog.struct.crown.climate.stability	Prop. Range Size Sampled	Phylogeographic Structure (0.9) ~ Mean Crown Age+Range Size+CS Annual Temp.+CS Temp. Seasonality+CS Annual Precip.+CS Precip. Seasonality+Elevation+Tarsus Length+Hand Wing Index+Migratory Distance+Landscape Ruggedness	<0.001	0.445	246.905	1.855	0.015
phylog.struct.crown.climate.stability	Age	Phylogeographic Structure (0.9) ~ Prop. Range Size Sampled+Range Size+CS Annual Temp.+CS Temp. Seasonality+CS Annual Precip.+CS Precip. Seasonality+Elevation+Tarsus Length+Hand Wing Index+Migratory Distance+Landscape Ruggedness	<0.001	0.219	318.367	73.317	0
phylog.struct.crown.lat	Elevation	Phylogeographic Structure (0.9) ~ Mean Crown Age+Prop. Range Size Sampled+Range Size+Latitude Mid.+Tarsus Length+Hand Wing Index+Migratory Distance+Landscape Ruggedness	<0.001	0.469	233.968	-2.166	0.175
phylog.struct.crown.lat	Hand Wing Index	Phylogeographic Structure (0.9) ~ Mean Crown Age+Prop. Range Size Sampled+Range Size+Latitude Mid.+Elevation+Tarsus Length+Migratory Distance+Landscape Ruggedness	<0.001	0.469	233.974	-2.159	0.175
phylog.struct.crown.lat	Tarsus Length	Phylogeographic Structure (0.9) ~ Mean Crown Age+Prop. Range Size Sampled+Range Size+Latitude Mid.+Elevation+Hand Wing Index+Migratory Distance+Landscape Ruggedness	<0.001	0.469	234.015	-2.118	0.171
phylog.struct.crown.lat	Migratory Distance	Phylogeographic Structure (0.9) ~ Mean Crown Age+Prop. Range Size Sampled+Range Size+Latitude Mid.+Elevation+Tarsus Length+Hand Wing Index+Landscape Ruggedness	<0.001	0.469	234.123	-2.01	0.162
phylog.struct.crown.lat	Landscape Ruggedness	Phylogeographic Structure (0.9) ~ Mean Crown Age+Prop. Range Size Sampled+Range Size+Latitude Mid.+Elevation+Tarsus Length+Hand Wing Index+Migratory Distance	<0.001	0.469	234.262	-1.871	0.151
phylog.struct.crown.lat	Range Size	Phylogeographic Structure (0.9) ~ Mean Crown Age+Prop. Range Size Sampled+Latitude Mid.+Elevation+Tarsus Length+Hand Wing Index+Migratory Distance+Landscape Ruggedness	<0.001	0.464	236.017	-0.116	0.063
phylog.struct.crown.lat	Full Model	Phylogeographic Structure (0.9) ~ Mean Crown Age+Prop. Range Size Sampled+Range Size+Latitude Mid.+Elevation+Tarsus Length+Hand Wing Index+Migratory Distance+Landscape Ruggedness	<0.001	0.467	236.133	0	0.059
phylog.struct.crown.lat	Prop. Range Size Sampled	Phylogeographic Structure (0.9) ~ Mean Crown Age+Range Size+Latitude Mid.+Elevation+Tarsus Length+Hand Wing Index+Migratory Distance+Landscape Ruggedness	<0.001	0.46	237.486	1.353	0.03
phylog.struct.crown.lat	Latitude Mid.	Phylogeographic Structure (0.9) ~ Mean Crown Age+Prop. Range Size Sampled+Range Size+Elevation+Tarsus Length+Hand Wing Index+Migratory Distance+Landscape Ruggedness	<0.001	0.456	239.296	3.163	0.012
phylog.struct.crown.lat	Age	Phylogeographic Structure (0.9) ~ Prop. Range Size Sampled+Range Size+Latitude Mid.+Elevation+Tarsus Length+Hand Wing Index+Migratory Distance+Landscape Ruggedness	<0.001	0.254	305.205	69.072	0
phylog.struct.crown.NPP	Hand Wing Index	Phylogeographic Structure (0.9) ~ Mean Crown Age+Prop. Range Size Sampled+Range Size+NPP+Elevation+Tarsus Length+Migratory Distance+Landscape Ruggedness	<0.001	0.462	236.979	-2.206	0.167
phylog.struct.crown.NPP	Elevation	Phylogeographic Structure (0.9) ~ Mean Crown Age+Prop. Range Size Sampled+Range Size+NPP+Tarsus Length+Hand Wing Index+Migratory Distance+Landscape Ruggedness	<0.001	0.462	236.984	-2.201	0.167
phylog.struct.crown.NPP	Tarsus Length	Phylogeographic Structure (0.9) ~ Mean Crown Age+Prop. Range Size Sampled+Range Size+NPP+Elevation+Hand Wing Index+Migratory Distance+Landscape Ruggedness	<0.001	0.462	236.997	-2.189	0.166
phylog.struct.crown.NPP	Migratory Distance	Phylogeographic Structure (0.9) ~ Mean Crown Age+Prop. Range Size Sampled+Range Size+NPP+Elevation+Tarsus Length+Hand Wing Index+Landscape Ruggedness	<0.001	0.461	237.154	-2.031	0.153
phylog.struct.crown.NPP	Landscape Ruggedness	Phylogeographic Structure (0.9) ~ Mean Crown Age+Prop. Range Size Sampled+Range Size+NPP+Elevation+Tarsus Length+Hand Wing Index+Migratory Distance	<0.001	0.461	237.437	-1.748	0.133
phylog.struct.crown.NPP	Range Size	Phylogeographic Structure (0.9) ~ Mean Crown Age+Prop. Range Size Sampled+NPP+Elevation+Tarsus Length+Hand Wing Index+Migratory Distance+Landscape Ruggedness	<0.001	0.458	238.253	-0.933	0.088
phylog.struct.crown.NPP	Full Model	Phylogeographic Structure (0.9) ~ Mean Crown Age+Prop. Range Size Sampled+Range Size+NPP+Elevation+Tarsus Length+Hand Wing Index+Migratory Distance+Landscape Ruggedness	<0.001	0.459	239.185	0	0.055
phylog.struct.crown.NPP	NPP	Phylogeographic Structure (0.9) ~ Mean Crown Age+Prop. Range Size Sampled+Range Size+Elevation+Tarsus Length+Hand Wing Index+Migratory Distance+Landscape Ruggedness	<0.001	0.456	239.296	0.111	0.052
phylog.struct.crown.NPP	Prop. Range Size Sampled	Phylogeographic Structure (0.9) ~ Mean Crown Age+Range Size+NPP+Elevation+Tarsus Length+Hand Wing Index+Migratory Distance+Landscape Ruggedness	<0.001	0.45	241.441	2.256	0.018
phylog.struct.crown.NPP	Age	Phylogeographic Structure (0.9) ~ Prop. Range Size Sampled+Range Size+NPP+Elevation+Tarsus Length+Hand Wing Index+Migratory Distance+Landscape Ruggedness	<0.001	0.223	313.748	74.562	0
phylog.struct.crown.pc1	Migratory Distance	Phylogeographic Structure (0.9) ~ Mean Crown Age+Prop. Range Size Sampled+Range Size+Bioclim PC1+Elevation+Tarsus Length+Hand Wing Index+Landscape Ruggedness	<0.001	0.464	235.972	-2.204	0.178
phylog.struct.crown.pc1	Hand Wing Index	Phylogeographic Structure (0.9) ~ Mean Crown Age+Prop. Range Size Sampled+Range Size+Bioclim PC1+Elevation+Tarsus Length+Migratory Distance+Landscape Ruggedness	<0.001	0.464	235.976	-2.2	0.177
phylog.struct.crown.pc1	Tarsus Length	Phylogeographic Structure (0.9) ~ Mean Crown Age+Prop. Range Size Sampled+Range Size+Bioclim PC1+Elevation+Hand Wing Index+Migratory Distance+Landscape Ruggedness	<0.001	0.464	235.993	-2.183	0.176
phylog.struct.crown.pc1	Elevation	Phylogeographic Structure (0.9) ~ Mean Crown Age+Prop. Range Size Sampled+Range Size+Bioclim PC1+Tarsus Length+Hand Wing Index+Migratory Distance+Landscape Ruggedness	<0.001	0.464	236.123	-2.052	0.165
phylog.struct.crown.pc1	Landscape Ruggedness	Phylogeographic Structure (0.9) ~ Mean Crown Age+Prop. Range Size Sampled+Range Size+Bioclim PC1+Elevation+Tarsus Length+Hand Wing Index+Migratory Distance	<0.001	0.463	236.58	-1.596	0.131
phylog.struct.crown.pc1	Full Model	Phylogeographic Structure (0.9) ~ Mean Crown Age+Prop. Range Size Sampled+Range Size+Bioclim PC1+Elevation+Tarsus Length+Hand Wing Index+Migratory Distance+Landscape Ruggedness	<0.001	0.462	238.176	0	0.059
phylog.struct.crown.pc1	Range Size	Phylogeographic Structure (0.9) ~ Mean Crown Age+Prop. Range Size Sampled+Bioclim PC1+Elevation+Tarsus Length+Hand Wing Index+Migratory Distance+Landscape Ruggedness	<0.001	0.459	238.193	0.017	0.059
phylog.struct.crown.pc1	Bioclim PC1	Phylogeographic Structure (0.9) ~ Mean Crown Age+Prop. Range Size Sampled+Range Size+Elevation+Tarsus Length+Hand Wing Index+Migratory Distance+Landscape Ruggedness	<0.001	0.456	239.296	1.12	0.034
phylog.struct.crown.pc1	Prop. Range Size Sampled	Phylogeographic Structure (0.9) ~ Mean Crown Age+Range Size+Bioclim PC1+Elevation+Tarsus Length+Hand Wing Index+Migratory Distance+Landscape Ruggedness	<0.001	0.453	240.222	2.046	0.021
phylog.struct.crown.pc1	Age	Phylogeographic Structure (0.9) ~ Prop. Range Size Sampled+Range Size+Bioclim PC1+Elevation+Tarsus Length+Hand Wing Index+Migratory Distance+Landscape Ruggedness	<0.001	0.233	310.881	72.705	0
phylog.struct.stem.climate.breadth	Hand Wing Index	Phylogeographic Structure (0.9) ~ Mean Stem Age+Prop. Range Size Sampled+Range Size+Annual Temp. Range+Temp. Seasonality Range+Annual Precip.+Precip. Seasonality+Elevational Range+Tarsus Length+Migratory Distance+Landscape Ruggedness	<0.001	0.355	278.309	-2.238	0.199
phylog.struct.stem.climate.breadth	Migratory Distance	Phylogeographic Structure (0.9) ~ Mean Stem Age+Prop. Range Size Sampled+Range Size+Annual Temp. Range+Temp. Seasonality Range+Annual Precip.+Precip. Seasonality+Elevational Range+Tarsus Length+Hand Wing Index+Landscape Ruggedness	<0.001	0.353	278.94	-1.608	0.145
phylog.struct.stem.climate.breadth	RANGE.bio1	Phylogeographic Structure (0.9) ~ Mean Stem Age+Prop. Range Size Sampled+Range Size+Temp. Seasonality Range+Annual Precip.+Precip. Seasonality+Elevational Range+Tarsus Length+Hand Wing Index+Migratory Distance+Landscape Ruggedness	<0.001	0.352	279.186	-1.362	0.128
phylog.struct.stem.climate.breadth	Elevation	Phylogeographic Structure (0.9) ~ Mean Stem Age+Prop. Range Size Sampled+Range Size+Annual Temp. Range+Temp. Seasonality Range+Annual Precip.+Precip. Seasonality+Tarsus Length+Hand Wing Index+Migratory Distance+Landscape Ruggedness	<0.001	0.351	279.532	-1.015	0.108
phylog.struct.stem.climate.breadth	Tarsus Length	Phylogeographic Structure (0.9) ~ Mean Stem Age+Prop. Range Size Sampled+Range Size+Annual Temp. Range+Temp. Seasonality Range+Annual Precip.+Precip. Seasonality+Elevational Range+Hand Wing Index+Migratory Distance+Landscape Ruggedness	<0.001	0.351	279.632	-0.916	0.103
phylog.struct.stem.climate.breadth	RANGE.bio4	Phylogeographic Structure (0.9) ~ Mean Stem Age+Prop. Range Size Sampled+Range Size+Annual Temp. Range+Annual Precip.+Precip. Seasonality+Elevational Range+Tarsus Length+Hand Wing Index+Migratory Distance+Landscape Ruggedness	<0.001	0.35	279.764	-0.784	0.096
phylog.struct.stem.climate.breadth	RANGE.bio15	Phylogeographic Structure (0.9) ~ Mean Stem Age+Prop. Range Size Sampled+Range Size+Annual Temp. Range+Temp. Seasonality Range+Annual Precip.+Elevational Range+Tarsus Length+Hand Wing Index+Migratory Distance+Landscape Ruggedness	<0.001	0.349	280.264	-0.283	0.075
phylog.struct.stem.climate.breadth	Full Model	Phylogeographic Structure (0.9) ~ Mean Stem Age+Prop. Range Size Sampled+Range Size+Annual Temp. Range+Temp. Seasonality Range+Annual Precip.+Precip. Seasonality+Elevational Range+Tarsus Length+Hand Wing Index+Migratory Distance+Landscape Ruggedness	<0.001	0.352	280.548	0	0.065
phylog.struct.stem.climate.breadth	Landscape Ruggedness	Phylogeographic Structure (0.9) ~ Mean Stem Age+Prop. Range Size Sampled+Range Size+Annual Temp. Range+Temp. Seasonality Range+Annual Precip.+Precip. Seasonality+Elevational Range+Tarsus Length+Hand Wing Index+Migratory Distance	<0.001	0.346	281.051	0.503	0.051
phylog.struct.stem.climate.breadth	Range Size	Phylogeographic Structure (0.9) ~ Mean Stem Age+Prop. Range Size Sampled+Annual Temp. Range+Temp. Seasonality Range+Annual Precip.+Precip. Seasonality+Elevational Range+Tarsus Length+Hand Wing Index+Migratory Distance+Landscape Ruggedness	<0.001	0.338	283.761	3.213	0.013
phylog.struct.stem.climate.breadth	Prop. Range Size Sampled	Phylogeographic Structure (0.9) ~ Mean Stem Age+Range Size+Annual Temp. Range+Temp. Seasonality Range+Annual Precip.+Precip. Seasonality+Elevational Range+Tarsus Length+Hand Wing Index+Migratory Distance+Landscape Ruggedness	<0.001	0.336	284.265	3.717	0.01
phylog.struct.stem.climate.breadth	RANGE.bio12	Phylogeographic Structure (0.9) ~ Mean Stem Age+Prop. Range Size Sampled+Range Size+Annual Temp. Range+Temp. Seasonality Range+Precip. Seasonality+Elevational Range+Tarsus Length+Hand Wing Index+Migratory Distance+Landscape Ruggedness	<0.001	0.333	285.227	4.679	0.006
phylog.struct.stem.climate.breadth	Age	Phylogeographic Structure (0.9) ~ Prop. Range Size Sampled+Range Size+Annual Temp. Range+Temp. Seasonality Range+Annual Precip.+Precip. Seasonality+Elevational Range+Tarsus Length+Hand Wing Index+Migratory Distance+Landscape Ruggedness	<0.001	0.253	309.012	28.464	0
phylog.struct.stem.climate.stability	CS_bio_12	Phylogeographic Structure (0.9) ~ Mean Stem Age+Prop. Range Size Sampled+Range Size+CS Annual Temp.+CS Temp. Seasonality+CS Precip. Seasonality+Elevation+Tarsus Length+Hand Wing Index+Migratory Distance+Landscape Ruggedness	<0.001	0.319	289.508	-2.22	0.156
phylog.struct.stem.climate.stability	Hand Wing Index	Phylogeographic Structure (0.9) ~ Mean Stem Age+Prop. Range Size Sampled+Range Size+CS Annual Temp.+CS Temp. Seasonality+CS Annual Precip.+CS Precip. Seasonality+Elevation+Tarsus Length+Migratory Distance+Landscape Ruggedness	<0.001	0.319	289.552	-2.177	0.153
phylog.struct.stem.climate.stability	Elevation	Phylogeographic Structure (0.9) ~ Mean Stem Age+Prop. Range Size Sampled+Range Size+CS Annual Temp.+CS Temp. Seasonality+CS Annual Precip.+CS Precip. Seasonality+Tarsus Length+Hand Wing Index+Migratory Distance+Landscape Ruggedness	<0.001	0.319	289.556	-2.172	0.153
phylog.struct.stem.climate.stability	Tarsus Length	Phylogeographic Structure (0.9) ~ Mean Stem Age+Prop. Range Size Sampled+Range Size+CS Annual Temp.+CS Temp. Seasonality+CS Annual Precip.+CS Precip. Seasonality+Elevation+Hand Wing Index+Migratory Distance+Landscape Ruggedness	<0.001	0.319	289.703	-2.026	0.142
phylog.struct.stem.climate.stability	Migratory Distance	Phylogeographic Structure (0.9) ~ Mean Stem Age+Prop. Range Size Sampled+Range Size+CS Annual Temp.+CS Temp. Seasonality+CS Annual Precip.+CS Precip. Seasonality+Elevation+Tarsus Length+Hand Wing Index+Landscape Ruggedness	<0.001	0.319	289.708	-2.021	0.142
phylog.struct.stem.climate.stability	CS_bio_15	Phylogeographic Structure (0.9) ~ Mean Stem Age+Prop. Range Size Sampled+Range Size+CS Annual Temp.+CS Temp. Seasonality+CS Annual Precip.+Elevation+Tarsus Length+Hand Wing Index+Migratory Distance+Landscape Ruggedness	<0.001	0.315	290.902	-0.826	0.078
phylog.struct.stem.climate.stability	Full Model	Phylogeographic Structure (0.9) ~ Mean Stem Age+Prop. Range Size Sampled+Range Size+CS Annual Temp.+CS Temp. Seasonality+CS Annual Precip.+CS Precip. Seasonality+Elevation+Tarsus Length+Hand Wing Index+Migratory Distance+Landscape Ruggedness	<0.001	0.316	291.728	0	0.052
phylog.struct.stem.climate.stability	CS_bio_04	Phylogeographic Structure (0.9) ~ Mean Stem Age+Prop. Range Size Sampled+Range Size+CS Annual Temp.+CS Annual Precip.+CS Precip. Seasonality+Elevation+Tarsus Length+Hand Wing Index+Migratory Distance+Landscape Ruggedness	<0.001	0.311	291.992	0.264	0.045
phylog.struct.stem.climate.stability	CS_bio_01	Phylogeographic Structure (0.9) ~ Mean Stem Age+Prop. Range Size Sampled+Range Size+CS Temp. Seasonality+CS Annual Precip.+CS Precip. Seasonality+Elevation+Tarsus Length+Hand Wing Index+Migratory Distance+Landscape Ruggedness	<0.001	0.31	292.258	0.53	0.04
phylog.struct.stem.climate.stability	Landscape Ruggedness	Phylogeographic Structure (0.9) ~ Mean Stem Age+Prop. Range Size Sampled+Range Size+CS Annual Temp.+CS Temp. Seasonality+CS Annual Precip.+CS Precip. Seasonality+Elevation+Tarsus Length+Hand Wing Index+Migratory Distance	<0.001	0.309	292.624	0.896	0.033
phylog.struct.stem.climate.stability	Prop. Range Size Sampled	Phylogeographic Structure (0.9) ~ Mean Stem Age+Range Size+CS Annual Temp.+CS Temp. Seasonality+CS Annual Precip.+CS Precip. Seasonality+Elevation+Tarsus Length+Hand Wing Index+Migratory Distance+Landscape Ruggedness	<0.001	0.296	296.63	4.902	0.004
phylog.struct.stem.climate.stability	Range Size	Phylogeographic Structure (0.9) ~ Mean Stem Age+Prop. Range Size Sampled+CS Annual Temp.+CS Temp. Seasonality+CS Annual Precip.+CS Precip. Seasonality+Elevation+Tarsus Length+Hand Wing Index+Migratory Distance+Landscape Ruggedness	<0.001	0.293	297.404	5.675	0.003
phylog.struct.stem.climate.stability	Age	Phylogeographic Structure (0.9) ~ Prop. Range Size Sampled+Range Size+CS Annual Temp.+CS Temp. Seasonality+CS Annual Precip.+CS Precip. Seasonality+Elevation+Tarsus Length+Hand Wing Index+Migratory Distance+Landscape Ruggedness	<0.001	0.219	318.367	26.639	0
phylog.struct.stem.lat	Elevation	Phylogeographic Structure (0.9) ~ Mean Stem Age+Prop. Range Size Sampled+Range Size+Latitude Mid.+Tarsus Length+Hand Wing Index+Migratory Distance+Landscape Ruggedness	<0.001	0.353	275.51	-2.206	0.212
phylog.struct.stem.lat	Migratory Distance	Phylogeographic Structure (0.9) ~ Mean Stem Age+Prop. Range Size Sampled+Range Size+Latitude Mid.+Elevation+Tarsus Length+Hand Wing Index+Landscape Ruggedness	<0.001	0.353	275.516	-2.201	0.211
phylog.struct.stem.lat	Hand Wing Index	Phylogeographic Structure (0.9) ~ Mean Stem Age+Prop. Range Size Sampled+Range Size+Latitude Mid.+Elevation+Tarsus Length+Migratory Distance+Landscape Ruggedness	<0.001	0.353	275.534	-2.183	0.21
phylog.struct.stem.lat	Tarsus Length	Phylogeographic Structure (0.9) ~ Mean Stem Age+Prop. Range Size Sampled+Range Size+Latitude Mid.+Elevation+Hand Wing Index+Migratory Distance+Landscape Ruggedness	<0.001	0.351	276.214	-1.503	0.149
phylog.struct.stem.lat	Landscape Ruggedness	Phylogeographic Structure (0.9) ~ Mean Stem Age+Prop. Range Size Sampled+Range Size+Latitude Mid.+Elevation+Tarsus Length+Hand Wing Index+Migratory Distance	<0.001	0.35	276.523	-1.193	0.128
phylog.struct.stem.lat	Full Model	Phylogeographic Structure (0.9) ~ Mean Stem Age+Prop. Range Size Sampled+Range Size+Latitude Mid.+Elevation+Tarsus Length+Hand Wing Index+Migratory Distance+Landscape Ruggedness	<0.001	0.349	277.717	0	0.07
phylog.struct.stem.lat	Prop. Range Size Sampled	Phylogeographic Structure (0.9) ~ Mean Stem Age+Range Size+Latitude Mid.+Elevation+Tarsus Length+Hand Wing Index+Migratory Distance+Landscape Ruggedness	<0.001	0.337	280.579	2.862	0.017
phylog.struct.stem.lat	Range Size	Phylogeographic Structure (0.9) ~ Mean Stem Age+Prop. Range Size Sampled+Latitude Mid.+Elevation+Tarsus Length+Hand Wing Index+Migratory Distance+Landscape Ruggedness	<0.001	0.326	284.052	6.335	0.003
phylog.struct.stem.lat	Latitude Mid.	Phylogeographic Structure (0.9) ~ Mean Stem Age+Prop. Range Size Sampled+Range Size+Elevation+Tarsus Length+Hand Wing Index+Migratory Distance+Landscape Ruggedness	<0.001	0.294	293.776	16.059	0
phylog.struct.stem.lat	Age	Phylogeographic Structure (0.9) ~ Prop. Range Size Sampled+Range Size+Latitude Mid.+Elevation+Tarsus Length+Hand Wing Index+Migratory Distance+Landscape Ruggedness	<0.001	0.254	305.205	27.488	0
phylog.struct.stem.NPP	Migratory Distance	Phylogeographic Structure (0.9) ~ Mean Stem Age+Prop. Range Size Sampled+Range Size+NPP+Elevation+Tarsus Length+Hand Wing Index+Landscape Ruggedness	<0.001	0.327	283.745	-2.166	0.212
phylog.struct.stem.NPP	Hand Wing Index	Phylogeographic Structure (0.9) ~ Mean Stem Age+Prop. Range Size Sampled+Range Size+NPP+Elevation+Tarsus Length+Migratory Distance+Landscape Ruggedness	<0.001	0.327	283.746	-2.164	0.212
phylog.struct.stem.NPP	Elevation	Phylogeographic Structure (0.9) ~ Mean Stem Age+Prop. Range Size Sampled+Range Size+NPP+Tarsus Length+Hand Wing Index+Migratory Distance+Landscape Ruggedness	<0.001	0.327	283.774	-2.136	0.209
phylog.struct.stem.NPP	Tarsus Length	Phylogeographic Structure (0.9) ~ Mean Stem Age+Prop. Range Size Sampled+Range Size+NPP+Elevation+Hand Wing Index+Migratory Distance+Landscape Ruggedness	<0.001	0.325	284.134	-1.777	0.175
phylog.struct.stem.NPP	Landscape Ruggedness	Phylogeographic Structure (0.9) ~ Mean Stem Age+Prop. Range Size Sampled+Range Size+NPP+Elevation+Tarsus Length+Hand Wing Index+Migratory Distance	<0.001	0.322	285.181	-0.73	0.104
phylog.struct.stem.NPP	Full Model	Phylogeographic Structure (0.9) ~ Mean Stem Age+Prop. Range Size Sampled+Range Size+NPP+Elevation+Tarsus Length+Hand Wing Index+Migratory Distance+Landscape Ruggedness	<0.001	0.323	285.91	0	0.072
phylog.struct.stem.NPP	Range Size	Phylogeographic Structure (0.9) ~ Mean Stem Age+Prop. Range Size Sampled+NPP+Elevation+Tarsus Length+Hand Wing Index+Migratory Distance+Landscape Ruggedness	<0.001	0.307	289.784	3.874	0.01
phylog.struct.stem.NPP	Prop. Range Size Sampled	Phylogeographic Structure (0.9) ~ Mean Stem Age+Range Size+NPP+Elevation+Tarsus Length+Hand Wing Index+Migratory Distance+Landscape Ruggedness	<0.001	0.302	291.328	5.417	0.005
phylog.struct.stem.NPP	NPP	Phylogeographic Structure (0.9) ~ Mean Stem Age+Prop. Range Size Sampled+Range Size+Elevation+Tarsus Length+Hand Wing Index+Migratory Distance+Landscape Ruggedness	<0.001	0.294	293.776	7.866	0.001
phylog.struct.stem.NPP	Age	Phylogeographic Structure (0.9) ~ Prop. Range Size Sampled+Range Size+NPP+Elevation+Tarsus Length+Hand Wing Index+Migratory Distance+Landscape Ruggedness	<0.001	0.223	313.748	27.837	0
phylog.struct.stem.pc1	Hand Wing Index	Phylogeographic Structure (0.9) ~ Mean Stem Age+Prop. Range Size Sampled+Range Size+Bioclim PC1+Elevation+Tarsus Length+Migratory Distance+Landscape Ruggedness	<0.001	0.336	280.725	-2.201	0.262
phylog.struct.stem.pc1	Tarsus Length	Phylogeographic Structure (0.9) ~ Mean Stem Age+Prop. Range Size Sampled+Range Size+Bioclim PC1+Elevation+Hand Wing Index+Migratory Distance+Landscape Ruggedness	<0.001	0.335	281.144	-1.783	0.212
phylog.struct.stem.pc1	Migratory Distance	Phylogeographic Structure (0.9) ~ Mean Stem Age+Prop. Range Size Sampled+Range Size+Bioclim PC1+Elevation+Tarsus Length+Hand Wing Index+Landscape Ruggedness	<0.001	0.334	281.345	-1.581	0.192
phylog.struct.stem.pc1	Elevation	Phylogeographic Structure (0.9) ~ Mean Stem Age+Prop. Range Size Sampled+Range Size+Bioclim PC1+Tarsus Length+Hand Wing Index+Migratory Distance+Landscape Ruggedness	<0.001	0.332	281.992	-0.935	0.139
phylog.struct.stem.pc1	Landscape Ruggedness	Phylogeographic Structure (0.9) ~ Mean Stem Age+Prop. Range Size Sampled+Range Size+Bioclim PC1+Elevation+Tarsus Length+Hand Wing Index+Migratory Distance	<0.001	0.33	282.698	-0.228	0.098
phylog.struct.stem.pc1	Full Model	Phylogeographic Structure (0.9) ~ Mean Stem Age+Prop. Range Size Sampled+Range Size+Bioclim PC1+Elevation+Tarsus Length+Hand Wing Index+Migratory Distance+Landscape Ruggedness	<0.001	0.333	282.927	0	0.087
phylog.struct.stem.pc1	Prop. Range Size Sampled	Phylogeographic Structure (0.9) ~ Mean Stem Age+Range Size+Bioclim PC1+Elevation+Tarsus Length+Hand Wing Index+Migratory Distance+Landscape Ruggedness	<0.001	0.314	287.558	4.632	0.009
phylog.struct.stem.pc1	Range Size	Phylogeographic Structure (0.9) ~ Mean Stem Age+Prop. Range Size Sampled+Bioclim PC1+Elevation+Tarsus Length+Hand Wing Index+Migratory Distance+Landscape Ruggedness	<0.001	0.304	290.653	7.727	0.002
phylog.struct.stem.pc1	Bioclim PC1	Phylogeographic Structure (0.9) ~ Mean Stem Age+Prop. Range Size Sampled+Range Size+Elevation+Tarsus Length+Hand Wing Index+Migratory Distance+Landscape Ruggedness	<0.001	0.294	293.776	10.85	0
phylog.struct.stem.pc1	Age	Phylogeographic Structure (0.9) ~ Prop. Range Size Sampled+Range Size+Bioclim PC1+Elevation+Tarsus Length+Hand Wing Index+Migratory Distance+Landscape Ruggedness	<0.001	0.233	310.881	27.954	0
lineage.loss.climate.breadth	Hand Wing Index	LineAge Loss ~ Prop. Range Size Sampled+Range Size+Annual Temp. Range+Temp. Seasonality Range+Annual Precip.+Precip. Seasonality+Elevational Range+Tarsus Length+Migratory Distance+Landscape Ruggedness	<0.001	0.15	-58.272	-2.25	0.287
lineage.loss.climate.breadth	RANGE.bio15	LineAge Loss ~ Prop. Range Size Sampled+Range Size+Annual Temp. Range+Temp. Seasonality Range+Annual Precip.+Elevational Range+Tarsus Length+Hand Wing Index+Migratory Distance+Landscape Ruggedness	<0.001	0.143	-56.657	-0.635	0.128
lineage.loss.climate.breadth	RANGE.bio1	LineAge Loss ~ Prop. Range Size Sampled+Range Size+Temp. Seasonality Range+Annual Precip.+Precip. Seasonality+Elevational Range+Tarsus Length+Hand Wing Index+Migratory Distance+Landscape Ruggedness	<0.001	0.142	-56.265	-0.243	0.105
lineage.loss.climate.breadth	Full Model	LineAge Loss ~ Prop. Range Size Sampled+Range Size+Annual Temp. Range+Temp. Seasonality Range+Annual Precip.+Precip. Seasonality+Elevational Range+Tarsus Length+Hand Wing Index+Migratory Distance+Landscape Ruggedness	<0.001	0.146	-56.022	0	0.093
lineage.loss.climate.breadth	Prop. Range Size Sampled	LineAge Loss ~ Range Size+Annual Temp. Range+Temp. Seasonality Range+Annual Precip.+Precip. Seasonality+Elevational Range+Tarsus Length+Hand Wing Index+Migratory Distance+Landscape Ruggedness	<0.001	0.14	-55.686	0.336	0.079
lineage.loss.climate.breadth	Tarsus Length	LineAge Loss ~ Prop. Range Size Sampled+Range Size+Annual Temp. Range+Temp. Seasonality Range+Annual Precip.+Precip. Seasonality+Elevational Range+Hand Wing Index+Migratory Distance+Landscape Ruggedness	<0.001	0.139	-55.536	0.486	0.073
lineage.loss.climate.breadth	Landscape Ruggedness	LineAge Loss ~ Prop. Range Size Sampled+Range Size+Annual Temp. Range+Temp. Seasonality Range+Annual Precip.+Precip. Seasonality+Elevational Range+Tarsus Length+Hand Wing Index+Migratory Distance	<0.001	0.138	-55.374	0.647	0.067
lineage.loss.climate.breadth	RANGE.bio4	LineAge Loss ~ Prop. Range Size Sampled+Range Size+Annual Temp. Range+Annual Precip.+Precip. Seasonality+Elevational Range+Tarsus Length+Hand Wing Index+Migratory Distance+Landscape Ruggedness	<0.001	0.136	-54.843	1.178	0.052
lineage.loss.climate.breadth	Elevation	LineAge Loss ~ Prop. Range Size Sampled+Range Size+Annual Temp. Range+Temp. Seasonality Range+Annual Precip.+Precip. Seasonality+Tarsus Length+Hand Wing Index+Migratory Distance+Landscape Ruggedness	<0.001	0.135	-54.606	1.415	0.046
lineage.loss.climate.breadth	Migratory Distance	LineAge Loss ~ Prop. Range Size Sampled+Range Size+Annual Temp. Range+Temp. Seasonality Range+Annual Precip.+Precip. Seasonality+Elevational Range+Tarsus Length+Hand Wing Index+Landscape Ruggedness	<0.001	0.135	-54.527	1.495	0.044
lineage.loss.climate.breadth	Range Size	LineAge Loss ~ Prop. Range Size Sampled+Annual Temp. Range+Temp. Seasonality Range+Annual Precip.+Precip. Seasonality+Elevational Range+Tarsus Length+Hand Wing Index+Migratory Distance+Landscape Ruggedness	<0.001	0.129	-53.141	2.88	0.022
lineage.loss.climate.breadth	RANGE.bio12	LineAge Loss ~ Prop. Range Size Sampled+Range Size+Annual Temp. Range+Temp. Seasonality Range+Precip. Seasonality+Elevational Range+Tarsus Length+Hand Wing Index+Migratory Distance+Landscape Ruggedness	<0.001	0.113	-49.415	6.606	0.003
lineage.loss.climate.stability	Hand Wing Index	LineAge Loss ~ Prop. Range Size Sampled+Range Size+CS Annual Temp.+CS Temp. Seasonality+CS Annual Precip.+CS Precip. Seasonality+Elevation+Tarsus Length+Migratory Distance+Landscape Ruggedness	<0.001	0.109	-48.377	-2.152	0.239
lineage.loss.climate.stability	CS_bio_12	LineAge Loss ~ Prop. Range Size Sampled+Range Size+CS Annual Temp.+CS Temp. Seasonality+CS Precip. Seasonality+Elevation+Tarsus Length+Hand Wing Index+Migratory Distance+Landscape Ruggedness	<0.001	0.108	-48.224	-1.999	0.222
lineage.loss.climate.stability	Elevation	LineAge Loss ~ Prop. Range Size Sampled+Range Size+CS Annual Temp.+CS Temp. Seasonality+CS Annual Precip.+CS Precip. Seasonality+Tarsus Length+Hand Wing Index+Migratory Distance+Landscape Ruggedness	<0.001	0.103	-47.03	-0.805	0.122
lineage.loss.climate.stability	CS_bio_15	LineAge Loss ~ Prop. Range Size Sampled+Range Size+CS Annual Temp.+CS Temp. Seasonality+CS Annual Precip.+Elevation+Tarsus Length+Hand Wing Index+Migratory Distance+Landscape Ruggedness	<0.001	0.102	-46.795	-0.571	0.108
lineage.loss.climate.stability	Full Model	LineAge Loss ~ Prop. Range Size Sampled+Range Size+CS Annual Temp.+CS Temp. Seasonality+CS Annual Precip.+CS Precip. Seasonality+Elevation+Tarsus Length+Hand Wing Index+Migratory Distance+Landscape Ruggedness	<0.001	0.105	-46.225	0	0.082
lineage.loss.climate.stability	CS_bio_01	LineAge Loss ~ Prop. Range Size Sampled+Range Size+CS Temp. Seasonality+CS Annual Precip.+CS Precip. Seasonality+Elevation+Tarsus Length+Hand Wing Index+Migratory Distance+Landscape Ruggedness	0.001	0.097	-45.567	0.658	0.059
lineage.loss.climate.stability	Tarsus Length	LineAge Loss ~ Prop. Range Size Sampled+Range Size+CS Annual Temp.+CS Temp. Seasonality+CS Annual Precip.+CS Precip. Seasonality+Elevation+Hand Wing Index+Migratory Distance+Landscape Ruggedness	0.001	0.096	-45.371	0.854	0.053
lineage.loss.climate.stability	CS_bio_04	LineAge Loss ~ Prop. Range Size Sampled+Range Size+CS Annual Temp.+CS Annual Precip.+CS Precip. Seasonality+Elevation+Tarsus Length+Hand Wing Index+Migratory Distance+Landscape Ruggedness	0.001	0.093	-44.747	1.478	0.039
lineage.loss.climate.stability	Prop. Range Size Sampled	LineAge Loss ~ Range Size+CS Annual Temp.+CS Temp. Seasonality+CS Annual Precip.+CS Precip. Seasonality+Elevation+Tarsus Length+Hand Wing Index+Migratory Distance+Landscape Ruggedness	0.001	0.09	-43.975	2.25	0.026
lineage.loss.climate.stability	Migratory Distance	LineAge Loss ~ Prop. Range Size Sampled+Range Size+CS Annual Temp.+CS Temp. Seasonality+CS Annual Precip.+CS Precip. Seasonality+Elevation+Tarsus Length+Hand Wing Index+Landscape Ruggedness	0.001	0.09	-43.926	2.299	0.026
lineage.loss.climate.stability	Landscape Ruggedness	LineAge Loss ~ Prop. Range Size Sampled+Range Size+CS Annual Temp.+CS Temp. Seasonality+CS Annual Precip.+CS Precip. Seasonality+Elevation+Tarsus Length+Hand Wing Index+Migratory Distance	0.001	0.089	-43.654	2.571	0.023
lineage.loss.climate.stability	Range Size	LineAge Loss ~ Prop. Range Size Sampled+CS Annual Temp.+CS Temp. Seasonality+CS Annual Precip.+CS Precip. Seasonality+Elevation+Tarsus Length+Hand Wing Index+Migratory Distance+Landscape Ruggedness	0.01	0.063	-37.993	8.232	0.001
lineage.loss.latitude	Elevation	LineAge Loss ~ Prop. Range Size Sampled+Range Size+Latitude Mid.+Tarsus Length+Hand Wing Index+Migratory Distance+Landscape Ruggedness	<0.001	0.149	-61.411	-1.548	0.266
lineage.loss.latitude	Hand Wing Index	LineAge Loss ~ Prop. Range Size Sampled+Range Size+Latitude Mid.+Elevation+Tarsus Length+Migratory Distance+Landscape Ruggedness	<0.001	0.149	-61.373	-1.51	0.261
lineage.loss.latitude	Landscape Ruggedness	LineAge Loss ~ Prop. Range Size Sampled+Range Size+Latitude Mid.+Elevation+Tarsus Length+Hand Wing Index+Migratory Distance	<0.001	0.144	-60.168	-0.306	0.143
lineage.loss.latitude	Full Model	LineAge Loss ~ Prop. Range Size Sampled+Range Size+Latitude Mid.+Elevation+Tarsus Length+Hand Wing Index+Migratory Distance+Landscape Ruggedness	<0.001	0.147	-59.863	0	0.123
lineage.loss.latitude	Prop. Range Size Sampled	LineAge Loss ~ Range Size+Latitude Mid.+Elevation+Tarsus Length+Hand Wing Index+Migratory Distance+Landscape Ruggedness	<0.001	0.141	-59.457	0.405	0.1
lineage.loss.latitude	Migratory Distance	LineAge Loss ~ Prop. Range Size Sampled+Range Size+Latitude Mid.+Elevation+Tarsus Length+Hand Wing Index+Landscape Ruggedness	<0.001	0.137	-58.478	1.385	0.061
lineage.loss.latitude	Tarsus Length	LineAge Loss ~ Prop. Range Size Sampled+Range Size+Latitude Mid.+Elevation+Hand Wing Index+Migratory Distance+Landscape Ruggedness	<0.001	0.134	-57.761	2.102	0.043
lineage.loss.latitude	Range Size	LineAge Loss ~ Prop. Range Size Sampled+Latitude Mid.+Elevation+Tarsus Length+Hand Wing Index+Migratory Distance+Landscape Ruggedness	<0.001	0.105	-50.921	8.942	0.001
lineage.loss.latitude	Latitude Mid.	LineAge Loss ~ Prop. Range Size Sampled+Range Size+Elevation+Tarsus Length+Hand Wing Index+Migratory Distance+Landscape Ruggedness	0.001	0.084	-44.587	15.276	0
lineage.loss.NPP	Hand Wing Index	LineAge Loss ~ Prop. Range Size Sampled+Range Size+NPP+Elevation+Tarsus Length+Migratory Distance+Landscape Ruggedness	<0.001	0.119	-54.275	-1.977	0.363
lineage.loss.NPP	Elevation	LineAge Loss ~ Prop. Range Size Sampled+Range Size+NPP+Tarsus Length+Hand Wing Index+Migratory Distance+Landscape Ruggedness	<0.001	0.115	-53.275	-0.976	0.22
lineage.loss.NPP	Full Model	LineAge Loss ~ Prop. Range Size Sampled+Range Size+NPP+Elevation+Tarsus Length+Hand Wing Index+Migratory Distance+Landscape Ruggedness	<0.001	0.116	-52.299	0	0.135
lineage.loss.NPP	Landscape Ruggedness	LineAge Loss ~ Prop. Range Size Sampled+Range Size+NPP+Elevation+Tarsus Length+Hand Wing Index+Migratory Distance	<0.001	0.109	-51.954	0.344	0.114
lineage.loss.NPP	Tarsus Length	LineAge Loss ~ Prop. Range Size Sampled+Range Size+NPP+Elevation+Hand Wing Index+Migratory Distance+Landscape Ruggedness	<0.001	0.104	-50.806	1.493	0.064
lineage.loss.NPP	Migratory Distance	LineAge Loss ~ Prop. Range Size Sampled+Range Size+NPP+Elevation+Tarsus Length+Hand Wing Index+Landscape Ruggedness	<0.001	0.104	-50.63	1.668	0.059
lineage.loss.NPP	Prop. Range Size Sampled	LineAge Loss ~ Range Size+NPP+Elevation+Tarsus Length+Hand Wing Index+Migratory Distance+Landscape Ruggedness	<0.001	0.099	-49.543	2.756	0.034
lineage.loss.NPP	Range Size	LineAge Loss ~ Prop. Range Size Sampled+NPP+Elevation+Tarsus Length+Hand Wing Index+Migratory Distance+Landscape Ruggedness	0.001	0.086	-46.496	5.803	0.007
lineage.loss.NPP	NPP	LineAge Loss ~ Prop. Range Size Sampled+Range Size+Elevation+Tarsus Length+Hand Wing Index+Migratory Distance+Landscape Ruggedness	0.001	0.085	-44.884	7.415	0.003
lineage.loss.pc1	Hand Wing Index	LineAge Loss ~ Prop. Range Size Sampled+Range Size+Bioclim PC1+Elevation+Tarsus Length+Migratory Distance+Landscape Ruggedness	<0.001	0.131	-57.151	-1.83	0.456
lineage.loss.pc1	Full Model	LineAge Loss ~ Prop. Range Size Sampled+Range Size+Bioclim PC1+Elevation+Tarsus Length+Hand Wing Index+Migratory Distance+Landscape Ruggedness	<0.001	0.128	-55.32	0	0.183
lineage.loss.pc1	Landscape Ruggedness	LineAge Loss ~ Prop. Range Size Sampled+Range Size+Bioclim PC1+Elevation+Tarsus Length+Hand Wing Index+Migratory Distance	<0.001	0.119	-54.241	1.079	0.107
lineage.loss.pc1	Tarsus Length	LineAge Loss ~ Prop. Range Size Sampled+Range Size+Bioclim PC1+Elevation+Hand Wing Index+Migratory Distance+Landscape Ruggedness	<0.001	0.117	-53.873	1.448	0.089
lineage.loss.pc1	Elevation	LineAge Loss ~ Prop. Range Size Sampled+Range Size+Bioclim PC1+Tarsus Length+Hand Wing Index+Migratory Distance+Landscape Ruggedness	<0.001	0.115	-53.407	1.913	0.07
lineage.loss.pc1	Prop. Range Size Sampled	LineAge Loss ~ Range Size+Bioclim PC1+Elevation+Tarsus Length+Hand Wing Index+Migratory Distance+Landscape Ruggedness	<0.001	0.115	-53.376	1.944	0.069
lineage.loss.pc1	Migratory Distance	LineAge Loss ~ Prop. Range Size Sampled+Range Size+Bioclim PC1+Elevation+Tarsus Length+Hand Wing Index+Landscape Ruggedness	<0.001	0.107	-51.37	3.95	0.025
lineage.loss.pc1	Range Size	LineAge Loss ~ Prop. Range Size Sampled+Bioclim PC1+Elevation+Tarsus Length+Hand Wing Index+Migratory Distance+Landscape Ruggedness	0.002	0.074	-43.89	11.43	0.001
lineage.loss.pc1	Bioclim PC1	LineAge Loss ~ Prop. Range Size Sampled+Range Size+Elevation+Tarsus Length+Hand Wing Index+Migratory Distance+Landscape Ruggedness	0.006	0.062	-41.095	14.225	0
Mean Stem Age.climate.breadth	Tarsus Length	Mean Stem Age ~ Prop. Range Size Sampled+Range Size+Annual Temp. Range+Temp. Seasonality Range+Annual Precip.+Precip. Seasonality+Elevational Range+Hand Wing Index+Migratory Distance+Landscape Ruggedness	<0.001	0.313	330.071	-2.202	0.227
Mean Stem Age.climate.breadth	Landscape Ruggedness	Mean Stem Age ~ Prop. Range Size Sampled+Range Size+Annual Temp. Range+Temp. Seasonality Range+Annual Precip.+Precip. Seasonality+Elevational Range+Tarsus Length+Hand Wing Index+Migratory Distance	<0.001	0.313	330.213	-2.06	0.211
Mean Stem Age.climate.breadth	RANGE.bio4	Mean Stem Age ~ Prop. Range Size Sampled+Range Size+Annual Temp. Range+Annual Precip.+Precip. Seasonality+Elevational Range+Tarsus Length+Hand Wing Index+Migratory Distance+Landscape Ruggedness	<0.001	0.313	330.308	-1.965	0.201
Mean Stem Age.climate.breadth	Migratory Distance	Mean Stem Age ~ Prop. Range Size Sampled+Range Size+Annual Temp. Range+Temp. Seasonality Range+Annual Precip.+Precip. Seasonality+Elevational Range+Tarsus Length+Hand Wing Index+Landscape Ruggedness	<0.001	0.309	331.374	-0.898	0.118
Mean Stem Age.climate.breadth	Full Model	Mean Stem Age ~ Prop. Range Size Sampled+Range Size+Annual Temp. Range+Temp. Seasonality Range+Annual Precip.+Precip. Seasonality+Elevational Range+Tarsus Length+Hand Wing Index+Migratory Distance+Landscape Ruggedness	<0.001	0.31	332.272	0	0.075
Mean Stem Age.climate.breadth	Prop. Range Size Sampled	Mean Stem Age ~ Range Size+Annual Temp. Range+Temp. Seasonality Range+Annual Precip.+Precip. Seasonality+Elevational Range+Tarsus Length+Hand Wing Index+Migratory Distance+Landscape Ruggedness	<0.001	0.304	332.79	0.517	0.058
Mean Stem Age.climate.breadth	Hand Wing Index	Mean Stem Age ~ Prop. Range Size Sampled+Range Size+Annual Temp. Range+Temp. Seasonality Range+Annual Precip.+Precip. Seasonality+Elevational Range+Tarsus Length+Migratory Distance+Landscape Ruggedness	<0.001	0.298	333.774	1.501	0.036
Mean Stem Age.climate.breadth	RANGE.bio15	Mean Stem Age ~ Prop. Range Size Sampled+Range Size+Annual Temp. Range+Temp. Seasonality Range+Annual Precip.+Elevational Range+Tarsus Length+Hand Wing Index+Migratory Distance+Landscape Ruggedness	<0.001	0.302	334.402	2.13	0.026
Mean Stem Age.climate.breadth	RANGE.bio1	Mean Stem Age ~ Prop. Range Size Sampled+Range Size+Temp. Seasonality Range+Annual Precip.+Precip. Seasonality+Elevational Range+Tarsus Length+Hand Wing Index+Migratory Distance+Landscape Ruggedness	<0.001	0.299	334.448	2.176	0.025
Mean Stem Age.climate.breadth	Elevation	Mean Stem Age ~ Prop. Range Size Sampled+Range Size+Annual Temp. Range+Temp. Seasonality Range+Annual Precip.+Precip. Seasonality+Tarsus Length+Hand Wing Index+Migratory Distance+Landscape Ruggedness	<0.001	0.298	334.659	2.387	0.023
Mean Stem Age.climate.breadth	RANGE.bio12	Mean Stem Age ~ Prop. Range Size Sampled+Range Size+Annual Temp. Range+Temp. Seasonality Range+Precip. Seasonality+Elevational Range+Tarsus Length+Hand Wing Index+Migratory Distance+Landscape Ruggedness	<0.001	0.242	349.833	17.56	0
Mean Stem Age.climate.breadth	Range Size	Mean Stem Age ~ Prop. Range Size Sampled+Annual Temp. Range+Temp. Seasonality Range+Annual Precip.+Precip. Seasonality+Elevational Range+Tarsus Length+Hand Wing Index+Migratory Distance+Landscape Ruggedness	<0.001	0.219	356.555	24.283	0
Mean Stem Age.climate.stability	Landscape Ruggedness	Mean Stem Age ~ Prop. Range Size Sampled+Range Size+CS Annual Temp.+CS Temp. Seasonality+CS Annual Precip.+CS Precip. Seasonality+Elevation+Tarsus Length+Hand Wing Index+Migratory Distance	<0.001	0.294	335.873	-2.126	0.181
Mean Stem Age.climate.stability	CS_bio_04	Mean Stem Age ~ Prop. Range Size Sampled+Range Size+CS Annual Temp.+CS Annual Precip.+CS Precip. Seasonality+Elevation+Tarsus Length+Hand Wing Index+Migratory Distance+Landscape Ruggedness	<0.001	0.293	335.997	-2.002	0.17
Mean Stem Age.climate.stability	CS_bio_15	Mean Stem Age ~ Prop. Range Size Sampled+Range Size+CS Annual Temp.+CS Temp. Seasonality+CS Annual Precip.+Elevation+Tarsus Length+Hand Wing Index+Migratory Distance+Landscape Ruggedness	<0.001	0.293	336.146	-1.853	0.158
Mean Stem Age.climate.stability	Migratory Distance	Mean Stem Age ~ Prop. Range Size Sampled+Range Size+CS Annual Temp.+CS Temp. Seasonality+CS Annual Precip.+CS Precip. Seasonality+Elevation+Tarsus Length+Hand Wing Index+Landscape Ruggedness	<0.001	0.293	336.244	-1.755	0.15
Mean Stem Age.climate.stability	Tarsus Length	Mean Stem Age ~ Prop. Range Size Sampled+Range Size+CS Annual Temp.+CS Temp. Seasonality+CS Annual Precip.+CS Precip. Seasonality+Elevation+Hand Wing Index+Migratory Distance+Landscape Ruggedness	<0.001	0.288	337.175	-0.824	0.094
Mean Stem Age.climate.stability	Full Model	Mean Stem Age ~ Prop. Range Size Sampled+Range Size+CS Annual Temp.+CS Temp. Seasonality+CS Annual Precip.+CS Precip. Seasonality+Elevation+Tarsus Length+Hand Wing Index+Migratory Distance+Landscape Ruggedness	<0.001	0.29	337.999	0	0.062
Mean Stem Age.climate.stability	Elevation	Mean Stem Age ~ Prop. Range Size Sampled+Range Size+CS Annual Temp.+CS Temp. Seasonality+CS Annual Precip.+CS Precip. Seasonality+Tarsus Length+Hand Wing Index+Migratory Distance+Landscape Ruggedness	<0.001	0.286	338.008	0.009	0.062
Mean Stem Age.climate.stability	CS_bio_12	Mean Stem Age ~ Prop. Range Size Sampled+Range Size+CS Annual Temp.+CS Temp. Seasonality+CS Precip. Seasonality+Elevation+Tarsus Length+Hand Wing Index+Migratory Distance+Landscape Ruggedness	<0.001	0.285	338.501	0.502	0.049
Mean Stem Age.climate.stability	Prop. Range Size Sampled	Mean Stem Age ~ Range Size+CS Annual Temp.+CS Temp. Seasonality+CS Annual Precip.+CS Precip. Seasonality+Elevation+Tarsus Length+Hand Wing Index+Migratory Distance+Landscape Ruggedness	<0.001	0.283	338.707	0.708	0.044
Mean Stem Age.climate.stability	Hand Wing Index	Mean Stem Age ~ Prop. Range Size Sampled+Range Size+CS Annual Temp.+CS Temp. Seasonality+CS Annual Precip.+CS Precip. Seasonality+Elevation+Tarsus Length+Migratory Distance+Landscape Ruggedness	<0.001	0.28	339.424	1.425	0.031
Mean Stem Age.climate.stability	CS_bio_01	Mean Stem Age ~ Prop. Range Size Sampled+Range Size+CS Temp. Seasonality+CS Annual Precip.+CS Precip. Seasonality+Elevation+Tarsus Length+Hand Wing Index+Migratory Distance+Landscape Ruggedness	<0.001	0.237	351.084	13.085	0
Mean Stem Age.climate.stability	Range Size	Mean Stem Age ~ Prop. Range Size Sampled+CS Annual Temp.+CS Temp. Seasonality+CS Annual Precip.+CS Precip. Seasonality+Elevation+Tarsus Length+Hand Wing Index+Migratory Distance+Landscape Ruggedness	<0.001	0.122	380.706	42.707	0
Mean Stem Age.lat	Landscape Ruggedness	Mean Stem Age ~ Prop. Range Size Sampled+Range Size+Latitude Mid.+Elevation+Tarsus Length+Hand Wing Index+Migratory Distance	<0.001	0.301	331.247	-2.185	0.271
Mean Stem Age.lat	Prop. Range Size Sampled	Mean Stem Age ~ Range Size+Latitude Mid.+Elevation+Tarsus Length+Hand Wing Index+Migratory Distance+Landscape Ruggedness	<0.001	0.298	331.989	-1.442	0.187
Mean Stem Age.lat	Tarsus Length	Mean Stem Age ~ Prop. Range Size Sampled+Range Size+Latitude Mid.+Elevation+Hand Wing Index+Migratory Distance+Landscape Ruggedness	<0.001	0.297	332.299	-1.132	0.16
Mean Stem Age.lat	Elevation	Mean Stem Age ~ Prop. Range Size Sampled+Range Size+Latitude Mid.+Tarsus Length+Hand Wing Index+Migratory Distance+Landscape Ruggedness	<0.001	0.298	332.384	-1.047	0.154
Mean Stem Age.lat	Full Model	Mean Stem Age ~ Prop. Range Size Sampled+Range Size+Latitude Mid.+Elevation+Tarsus Length+Hand Wing Index+Migratory Distance+Landscape Ruggedness	<0.001	0.298	333.431	0	0.091
Mean Stem Age.lat	Migratory Distance	Mean Stem Age ~ Prop. Range Size Sampled+Range Size+Latitude Mid.+Elevation+Tarsus Length+Hand Wing Index+Landscape Ruggedness	<0.001	0.294	333.771	0.34	0.077
Mean Stem Age.lat	Hand Wing Index	Mean Stem Age ~ Prop. Range Size Sampled+Range Size+Latitude Mid.+Elevation+Tarsus Length+Migratory Distance+Landscape Ruggedness	<0.001	0.29	334.259	0.828	0.06
Mean Stem Age.lat	Latitude Mid.	Mean Stem Age ~ Prop. Range Size Sampled+Range Size+Elevation+Tarsus Length+Hand Wing Index+Migratory Distance+Landscape Ruggedness	<0.001	0.227	351.15	17.718	0
Mean Stem Age.lat	Range Size	Mean Stem Age ~ Prop. Range Size Sampled+Latitude Mid.+Elevation+Tarsus Length+Hand Wing Index+Migratory Distance+Landscape Ruggedness	<0.001	0.153	372.305	38.874	0
Mean Stem Age.NPP	Landscape Ruggedness	Mean Stem Age ~ Prop. Range Size Sampled+Range Size+NPP+Elevation+Tarsus Length+Hand Wing Index+Migratory Distance	<0.001	0.303	330.198	-2.181	0.309
Mean Stem Age.NPP	Migratory Distance	Mean Stem Age ~ Prop. Range Size Sampled+Range Size+NPP+Elevation+Tarsus Length+Hand Wing Index+Landscape Ruggedness	<0.001	0.301	331.07	-1.309	0.2
Mean Stem Age.NPP	Tarsus Length	Mean Stem Age ~ Prop. Range Size Sampled+Range Size+NPP+Elevation+Hand Wing Index+Migratory Distance+Landscape Ruggedness	<0.001	0.299	331.217	-1.162	0.185
Mean Stem Age.NPP	Full Model	Mean Stem Age ~ Prop. Range Size Sampled+Range Size+NPP+Elevation+Tarsus Length+Hand Wing Index+Migratory Distance+Landscape Ruggedness	<0.001	0.3	332.379	0	0.104
Mean Stem Age.NPP	Elevation	Mean Stem Age ~ Prop. Range Size Sampled+Range Size+NPP+Tarsus Length+Hand Wing Index+Migratory Distance+Landscape Ruggedness	<0.001	0.295	332.808	0.429	0.084
Mean Stem Age.NPP	Prop. Range Size Sampled	Mean Stem Age ~ Range Size+NPP+Elevation+Tarsus Length+Hand Wing Index+Migratory Distance+Landscape Ruggedness	<0.001	0.294	332.832	0.453	0.083
Mean Stem Age.NPP	Hand Wing Index	Mean Stem Age ~ Prop. Range Size Sampled+Range Size+NPP+Elevation+Tarsus Length+Migratory Distance+Landscape Ruggedness	<0.001	0.287	334.499	2.12	0.036
Mean Stem Age.NPP	NPP	Mean Stem Age ~ Prop. Range Size Sampled+Range Size+Elevation+Tarsus Length+Hand Wing Index+Migratory Distance+Landscape Ruggedness	<0.001	0.224	351.407	19.028	0
Mean Stem Age.NPP	Range Size	Mean Stem Age ~ Prop. Range Size Sampled+NPP+Elevation+Tarsus Length+Hand Wing Index+Migratory Distance+Landscape Ruggedness	<0.001	0.183	364.244	31.865	0
Mean Stem Age.pc1	Migratory Distance	Mean Stem Age ~ Prop. Range Size Sampled+Range Size+Bioclim PC1+Elevation+Tarsus Length+Hand Wing Index+Landscape Ruggedness	<0.001	0.306	329.38	-2.158	0.298
Mean Stem Age.pc1	Landscape Ruggedness	Mean Stem Age ~ Prop. Range Size Sampled+Range Size+Bioclim PC1+Elevation+Tarsus Length+Hand Wing Index+Migratory Distance	<0.001	0.305	329.436	-2.102	0.29
Mean Stem Age.pc1	Tarsus Length	Mean Stem Age ~ Prop. Range Size Sampled+Range Size+Bioclim PC1+Elevation+Hand Wing Index+Migratory Distance+Landscape Ruggedness	<0.001	0.3	330.693	-0.845	0.155
Mean Stem Age.pc1	Prop. Range Size Sampled	Mean Stem Age ~ Range Size+Bioclim PC1+Elevation+Tarsus Length+Hand Wing Index+Migratory Distance+Landscape Ruggedness	<0.001	0.298	331.38	-0.158	0.11
Mean Stem Age.pc1	Full Model	Mean Stem Age ~ Prop. Range Size Sampled+Range Size+Bioclim PC1+Elevation+Tarsus Length+Hand Wing Index+Migratory Distance+Landscape Ruggedness	<0.001	0.302	331.538	0	0.101
Mean Stem Age.pc1	Hand Wing Index	Mean Stem Age ~ Prop. Range Size Sampled+Range Size+Bioclim PC1+Elevation+Tarsus Length+Migratory Distance+Landscape Ruggedness	<0.001	0.291	333.342	1.804	0.041
Mean Stem Age.pc1	Elevation	Mean Stem Age ~ Prop. Range Size Sampled+Range Size+Bioclim PC1+Tarsus Length+Hand Wing Index+Migratory Distance+Landscape Ruggedness	<0.001	0.277	337.282	5.744	0.006
Mean Stem Age.pc1	Bioclim PC1	Mean Stem Age ~ Prop. Range Size Sampled+Range Size+Elevation+Tarsus Length+Hand Wing Index+Migratory Distance+Landscape Ruggedness	<0.001	0.226	350.84	19.302	0
Mean Stem Age.pc1	Range Size	Mean Stem Age ~ Prop. Range Size Sampled+Bioclim PC1+Elevation+Tarsus Length+Hand Wing Index+Migratory Distance+Landscape Ruggedness	<0.001	0.122	378.44	46.902	0
stem.rate.climate.breadth	Hand Wing Index	Stem Splitting Rate (0.9) ~ Prop. Range Size Sampled+Range Size+Annual Temp. Range+Temp. Seasonality Range+Annual Precip.+Precip. Seasonality+Elevational Range+Tarsus Length+Migratory Distance+Landscape Ruggedness	0.027	0.05	75.545	-2.206	0.131
stem.rate.climate.breadth	RANGE.bio1	Stem Splitting Rate (0.9) ~ Prop. Range Size Sampled+Range Size+Temp. Seasonality Range+Annual Precip.+Precip. Seasonality+Elevational Range+Tarsus Length+Hand Wing Index+Migratory Distance+Landscape Ruggedness	0.027	0.049	75.609	-2.142	0.127
stem.rate.climate.breadth	Migratory Distance	Stem Splitting Rate (0.9) ~ Prop. Range Size Sampled+Range Size+Annual Temp. Range+Temp. Seasonality Range+Annual Precip.+Precip. Seasonality+Elevational Range+Tarsus Length+Hand Wing Index+Landscape Ruggedness	0.028	0.049	75.633	-2.118	0.125
stem.rate.climate.breadth	Elevation	Stem Splitting Rate (0.9) ~ Prop. Range Size Sampled+Range Size+Annual Temp. Range+Temp. Seasonality Range+Annual Precip.+Precip. Seasonality+Tarsus Length+Hand Wing Index+Migratory Distance+Landscape Ruggedness	0.028	0.049	75.644	-2.107	0.125
stem.rate.climate.breadth	RANGE.bio4	Stem Splitting Rate (0.9) ~ Prop. Range Size Sampled+Range Size+Annual Temp. Range+Annual Precip.+Precip. Seasonality+Elevational Range+Tarsus Length+Hand Wing Index+Migratory Distance+Landscape Ruggedness	0.03	0.048	75.859	-1.892	0.112
stem.rate.climate.breadth	RANGE.bio15	Stem Splitting Rate (0.9) ~ Prop. Range Size Sampled+Range Size+Annual Temp. Range+Temp. Seasonality Range+Annual Precip.+Elevational Range+Tarsus Length+Hand Wing Index+Migratory Distance+Landscape Ruggedness	0.032	0.047	76.096	-1.655	0.099
stem.rate.climate.breadth	Landscape Ruggedness	Stem Splitting Rate (0.9) ~ Prop. Range Size Sampled+Range Size+Annual Temp. Range+Temp. Seasonality Range+Annual Precip.+Precip. Seasonality+Elevational Range+Tarsus Length+Hand Wing Index+Migratory Distance	0.037	0.045	76.607	-1.144	0.077
stem.rate.climate.breadth	RANGE.bio12	Stem Splitting Rate (0.9) ~ Prop. Range Size Sampled+Range Size+Annual Temp. Range+Temp. Seasonality Range+Precip. Seasonality+Elevational Range+Tarsus Length+Hand Wing Index+Migratory Distance+Landscape Ruggedness	0.04	0.044	76.84	-0.911	0.069
stem.rate.climate.breadth	Tarsus Length	Stem Splitting Rate (0.9) ~ Prop. Range Size Sampled+Range Size+Annual Temp. Range+Temp. Seasonality Range+Annual Precip.+Precip. Seasonality+Elevational Range+Hand Wing Index+Migratory Distance+Landscape Ruggedness	0.051	0.04	77.649	-0.102	0.046
stem.rate.climate.breadth	Full Model	Stem Splitting Rate (0.9) ~ Prop. Range Size Sampled+Range Size+Annual Temp. Range+Temp. Seasonality Range+Annual Precip.+Precip. Seasonality+Elevational Range+Tarsus Length+Hand Wing Index+Migratory Distance+Landscape Ruggedness	0.042	0.045	77.751	0	0.043
stem.rate.climate.breadth	Range Size	Stem Splitting Rate (0.9) ~ Prop. Range Size Sampled+Annual Temp. Range+Temp. Seasonality Range+Annual Precip.+Precip. Seasonality+Elevational Range+Tarsus Length+Hand Wing Index+Migratory Distance+Landscape Ruggedness	0.058	0.038	78.055	0.304	0.037
stem.rate.climate.breadth	Prop. Range Size Sampled	Stem Splitting Rate (0.9) ~ Range Size+Annual Temp. Range+Temp. Seasonality Range+Annual Precip.+Precip. Seasonality+Elevational Range+Tarsus Length+Hand Wing Index+Migratory Distance+Landscape Ruggedness	0.132	0.025	81.009	3.258	0.009
stem.rate.climate.stability	Hand Wing Index	Stem Splitting Rate (0.9) ~ Prop. Range Size Sampled+Range Size+CS Annual Temp.+CS Temp. Seasonality+CS Annual Precip.+CS Precip. Seasonality+Elevation+Tarsus Length+Migratory Distance+Landscape Ruggedness	0.011	0.063	73.389	-2.251	0.152
stem.rate.climate.stability	Migratory Distance	Stem Splitting Rate (0.9) ~ Prop. Range Size Sampled+Range Size+CS Annual Temp.+CS Temp. Seasonality+CS Annual Precip.+CS Precip. Seasonality+Elevation+Tarsus Length+Hand Wing Index+Landscape Ruggedness	0.011	0.062	73.58	-2.059	0.138
stem.rate.climate.stability	CS_bio_12	Stem Splitting Rate (0.9) ~ Prop. Range Size Sampled+Range Size+CS Annual Temp.+CS Temp. Seasonality+CS Precip. Seasonality+Elevation+Tarsus Length+Hand Wing Index+Migratory Distance+Landscape Ruggedness	0.012	0.061	73.675	-1.965	0.132
stem.rate.climate.stability	CS_bio_15	Stem Splitting Rate (0.9) ~ Prop. Range Size Sampled+Range Size+CS Annual Temp.+CS Temp. Seasonality+CS Annual Precip.+Elevation+Tarsus Length+Hand Wing Index+Migratory Distance+Landscape Ruggedness	0.013	0.06	73.705	-1.935	0.13
stem.rate.climate.stability	Landscape Ruggedness	Stem Splitting Rate (0.9) ~ Prop. Range Size Sampled+Range Size+CS Annual Temp.+CS Temp. Seasonality+CS Annual Precip.+CS Precip. Seasonality+Elevation+Tarsus Length+Hand Wing Index+Migratory Distance	0.013	0.06	74.203	-1.436	0.101
stem.rate.climate.stability	CS_bio_04	Stem Splitting Rate (0.9) ~ Prop. Range Size Sampled+Range Size+CS Annual Temp.+CS Annual Precip.+CS Precip. Seasonality+Elevation+Tarsus Length+Hand Wing Index+Migratory Distance+Landscape Ruggedness	0.016	0.057	74.368	-1.272	0.093
stem.rate.climate.stability	Tarsus Length	Stem Splitting Rate (0.9) ~ Prop. Range Size Sampled+Range Size+CS Annual Temp.+CS Temp. Seasonality+CS Annual Precip.+CS Precip. Seasonality+Elevation+Hand Wing Index+Migratory Distance+Landscape Ruggedness	0.016	0.057	74.955	-0.684	0.07
stem.rate.climate.stability	CS_bio_01	Stem Splitting Rate (0.9) ~ Prop. Range Size Sampled+Range Size+CS Temp. Seasonality+CS Annual Precip.+CS Precip. Seasonality+Elevation+Tarsus Length+Hand Wing Index+Migratory Distance+Landscape Ruggedness	0.02	0.054	74.961	-0.678	0.069
stem.rate.climate.stability	Elevation	Stem Splitting Rate (0.9) ~ Prop. Range Size Sampled+Range Size+CS Annual Temp.+CS Temp. Seasonality+CS Annual Precip.+CS Precip. Seasonality+Tarsus Length+Hand Wing Index+Migratory Distance+Landscape Ruggedness	0.023	0.052	75.408	-0.231	0.055
stem.rate.climate.stability	Full Model	Stem Splitting Rate (0.9) ~ Prop. Range Size Sampled+Range Size+CS Annual Temp.+CS Temp. Seasonality+CS Annual Precip.+CS Precip. Seasonality+Elevation+Tarsus Length+Hand Wing Index+Migratory Distance+Landscape Ruggedness	0.018	0.058	75.639	0	0.049
stem.rate.climate.stability	Prop. Range Size Sampled	Stem Splitting Rate (0.9) ~ Range Size+CS Annual Temp.+CS Temp. Seasonality+CS Annual Precip.+CS Precip. Seasonality+Elevation+Tarsus Length+Hand Wing Index+Migratory Distance+Landscape Ruggedness	0.087	0.032	79.805	4.165	0.006
stem.rate.climate.stability	Range Size	Stem Splitting Rate (0.9) ~ Prop. Range Size Sampled+CS Annual Temp.+CS Temp. Seasonality+CS Annual Precip.+CS Precip. Seasonality+Elevation+Tarsus Length+Hand Wing Index+Migratory Distance+Landscape Ruggedness	0.04	0.044	80.902	5.263	0.004
stem.rate.lat	Migratory Distance	Stem Splitting Rate (0.9) ~ Prop. Range Size Sampled+Range Size+Latitude Mid.+Elevation+Tarsus Length+Hand Wing Index+Landscape Ruggedness	0.001	0.08	66.002	-2.173	0.243
stem.rate.lat	Hand Wing Index	Stem Splitting Rate (0.9) ~ Prop. Range Size Sampled+Range Size+Latitude Mid.+Elevation+Tarsus Length+Migratory Distance+Landscape Ruggedness	0.001	0.08	66.05	-2.126	0.237
stem.rate.lat	Landscape Ruggedness	Stem Splitting Rate (0.9) ~ Prop. Range Size Sampled+Range Size+Latitude Mid.+Elevation+Tarsus Length+Hand Wing Index+Migratory Distance	0.001	0.08	66.145	-2.031	0.226
stem.rate.lat	Tarsus Length	Stem Splitting Rate (0.9) ~ Prop. Range Size Sampled+Range Size+Latitude Mid.+Elevation+Hand Wing Index+Migratory Distance+Landscape Ruggedness	0.002	0.072	68.088	-0.088	0.086
stem.rate.lat	Full Model	Stem Splitting Rate (0.9) ~ Prop. Range Size Sampled+Range Size+Latitude Mid.+Elevation+Tarsus Length+Hand Wing Index+Migratory Distance+Landscape Ruggedness	0.002	0.076	68.176	0	0.082
stem.rate.lat	Elevation	Stem Splitting Rate (0.9) ~ Prop. Range Size Sampled+Range Size+Latitude Mid.+Tarsus Length+Hand Wing Index+Migratory Distance+Landscape Ruggedness	0.003	0.069	68.178	0.003	0.082
stem.rate.lat	Latitude Mid.	Stem Splitting Rate (0.9) ~ Prop. Range Size Sampled+Range Size+Elevation+Tarsus Length+Hand Wing Index+Migratory Distance+Landscape Ruggedness	0.01	0.055	71.08	2.905	0.019
stem.rate.lat	Prop. Range Size Sampled	Stem Splitting Rate (0.9) ~ Range Size+Latitude Mid.+Elevation+Tarsus Length+Hand Wing Index+Migratory Distance+Landscape Ruggedness	0.01	0.055	71.509	3.333	0.015
stem.rate.lat	Range Size	Stem Splitting Rate (0.9) ~ Prop. Range Size Sampled+Latitude Mid.+Elevation+Tarsus Length+Hand Wing Index+Migratory Distance+Landscape Ruggedness	0.01	0.055	72.455	4.28	0.01
stem.rate.NPP	Hand Wing Index	Stem Splitting Rate (0.9) ~ Prop. Range Size Sampled+Range Size+NPP+Elevation+Tarsus Length+Migratory Distance+Landscape Ruggedness	0.002	0.072	67.895	-2.172	0.24
stem.rate.NPP	Migratory Distance	Stem Splitting Rate (0.9) ~ Prop. Range Size Sampled+Range Size+NPP+Elevation+Tarsus Length+Hand Wing Index+Landscape Ruggedness	0.002	0.072	67.94	-2.127	0.235
stem.rate.NPP	Landscape Ruggedness	Stem Splitting Rate (0.9) ~ Prop. Range Size Sampled+Range Size+NPP+Elevation+Tarsus Length+Hand Wing Index+Migratory Distance	0.002	0.072	68.138	-1.929	0.213
stem.rate.NPP	Tarsus Length	Stem Splitting Rate (0.9) ~ Prop. Range Size Sampled+Range Size+NPP+Elevation+Hand Wing Index+Migratory Distance+Landscape Ruggedness	0.005	0.064	69.792	-0.275	0.093
stem.rate.NPP	Full Model	Stem Splitting Rate (0.9) ~ Prop. Range Size Sampled+Range Size+NPP+Elevation+Tarsus Length+Hand Wing Index+Migratory Distance+Landscape Ruggedness	0.005	0.068	70.067	0	0.081
stem.rate.NPP	Elevation	Stem Splitting Rate (0.9) ~ Prop. Range Size Sampled+Range Size+NPP+Tarsus Length+Hand Wing Index+Migratory Distance+Landscape Ruggedness	0.008	0.058	70.539	0.472	0.064
stem.rate.NPP	NPP	Stem Splitting Rate (0.9) ~ Prop. Range Size Sampled+Range Size+Elevation+Tarsus Length+Hand Wing Index+Migratory Distance+Landscape Ruggedness	0.01	0.055	71.197	1.13	0.046
stem.rate.NPP	Range Size	Stem Splitting Rate (0.9) ~ Prop. Range Size Sampled+NPP+Elevation+Tarsus Length+Hand Wing Index+Migratory Distance+Landscape Ruggedness	0.004	0.065	72.796	2.729	0.021
stem.rate.NPP	Prop. Range Size Sampled	Stem Splitting Rate (0.9) ~ Range Size+NPP+Elevation+Tarsus Length+Hand Wing Index+Migratory Distance+Landscape Ruggedness	0.037	0.038	74.903	4.836	0.007
stem.rate.pc1	Hand Wing Index	Stem Splitting Rate (0.9) ~ Prop. Range Size Sampled+Range Size+Bioclim PC1+Elevation+Tarsus Length+Migratory Distance+Landscape Ruggedness	0.003	0.069	68.379	-2.175	0.248
stem.rate.pc1	Migratory Distance	Stem Splitting Rate (0.9) ~ Prop. Range Size Sampled+Range Size+Bioclim PC1+Elevation+Tarsus Length+Hand Wing Index+Landscape Ruggedness	0.003	0.068	68.488	-2.066	0.234
stem.rate.pc1	Landscape Ruggedness	Stem Splitting Rate (0.9) ~ Prop. Range Size Sampled+Range Size+Bioclim PC1+Elevation+Tarsus Length+Hand Wing Index+Migratory Distance	0.003	0.068	68.782	-1.772	0.202
stem.rate.pc1	Tarsus Length	Stem Splitting Rate (0.9) ~ Prop. Range Size Sampled+Range Size+Bioclim PC1+Elevation+Hand Wing Index+Migratory Distance+Landscape Ruggedness	0.006	0.062	70.073	-0.481	0.106
stem.rate.pc1	Full Model	Stem Splitting Rate (0.9) ~ Prop. Range Size Sampled+Range Size+Bioclim PC1+Elevation+Tarsus Length+Hand Wing Index+Migratory Distance+Landscape Ruggedness	0.006	0.064	70.554	0	0.083
stem.rate.pc1	Bioclim PC1	Stem Splitting Rate (0.9) ~ Prop. Range Size Sampled+Range Size+Elevation+Tarsus Length+Hand Wing Index+Migratory Distance+Landscape Ruggedness	0.01	0.055	71.013	0.459	0.066
stem.rate.pc1	Elevation	Stem Splitting Rate (0.9) ~ Prop. Range Size Sampled+Range Size+Bioclim PC1+Tarsus Length+Hand Wing Index+Migratory Distance+Landscape Ruggedness	0.013	0.052	71.849	1.295	0.044
stem.rate.pc1	Prop. Range Size Sampled	Stem Splitting Rate (0.9) ~ Range Size+Bioclim PC1+Elevation+Tarsus Length+Hand Wing Index+Migratory Distance+Landscape Ruggedness	0.037	0.038	74.809	4.255	0.01
stem.rate.pc1	Range Size	Stem Splitting Rate (0.9) ~ Prop. Range Size Sampled+Bioclim PC1+Elevation+Tarsus Length+Hand Wing Index+Migratory Distance+Landscape Ruggedness	0.041	0.037	75.796	5.242	0.006

## Sheet: AOU 0.8 - Model Summaries
Model Set	Variable Removed*	Description of Model (see Materials and Methods for which variables were square root converted)	P-value	adj.R2	AICc	delta AICc	AICc weight	*see Variable Key in S2 Table
Mean Crown Age.climate.stability	Tarsus Length	Mean Crown Age ~ Prop. Range Size Sampled+Range Size+CS Annual Temp.+CS Temp. Seasonality+CS Annual Precip.+CS Precip. Seasonality+Elevation+Hand Wing Index+Migratory Distance+Landscape Ruggedness	<0.001	0.344	266.05	-2.185	0.247
Mean Crown Age.climate.stability	Migratory Distance	Mean Crown Age ~ Prop. Range Size Sampled+Range Size+CS Annual Temp.+CS Temp. Seasonality+CS Annual Precip.+CS Precip. Seasonality+Elevation+Tarsus Length+Hand Wing Index+Landscape Ruggedness	<0.001	0.343	266.291	-1.944	0.219
Mean Crown Age.climate.stability	Elevation	Mean Crown Age ~ Prop. Range Size Sampled+Range Size+CS Annual Temp.+CS Temp. Seasonality+CS Annual Precip.+CS Precip. Seasonality+Tarsus Length+Hand Wing Index+Migratory Distance+Landscape Ruggedness	<0.001	0.339	267.726	-0.509	0.107
Mean Crown Age.climate.stability	CS_bio_15	Mean Crown Age ~ Prop. Range Size Sampled+Range Size+CS Annual Temp.+CS Temp. Seasonality+CS Annual Precip.+Elevation+Tarsus Length+Hand Wing Index+Migratory Distance+Landscape Ruggedness	<0.001	0.336	267.896	-0.339	0.098
Mean Crown Age.climate.stability	Full Model	Mean Crown Age ~ Prop. Range Size Sampled+Range Size+CS Annual Temp.+CS Temp. Seasonality+CS Annual Precip.+CS Precip. Seasonality+Elevation+Tarsus Length+Hand Wing Index+Migratory Distance+Landscape Ruggedness	<0.001	0.341	268.235	0	0.083
Mean Crown Age.climate.stability	CS_bio_04	Mean Crown Age ~ Prop. Range Size Sampled+Range Size+CS Annual Temp.+CS Annual Precip.+CS Precip. Seasonality+Elevation+Tarsus Length+Hand Wing Index+Migratory Distance+Landscape Ruggedness	<0.001	0.336	268.308	0.073	0.08
Mean Crown Age.climate.stability	Hand Wing Index	Mean Crown Age ~ Prop. Range Size Sampled+Range Size+CS Annual Temp.+CS Temp. Seasonality+CS Annual Precip.+CS Precip. Seasonality+Elevation+Tarsus Length+Migratory Distance+Landscape Ruggedness	<0.001	0.332	268.714	0.479	0.065
Mean Crown Age.climate.stability	CS_bio_12	Mean Crown Age ~ Prop. Range Size Sampled+Range Size+CS Annual Temp.+CS Temp. Seasonality+CS Precip. Seasonality+Elevation+Tarsus Length+Hand Wing Index+Migratory Distance+Landscape Ruggedness	<0.001	0.338	268.724	0.489	0.065
Mean Crown Age.climate.stability	Landscape Ruggedness	Mean Crown Age ~ Prop. Range Size Sampled+Range Size+CS Annual Temp.+CS Temp. Seasonality+CS Annual Precip.+CS Precip. Seasonality+Elevation+Tarsus Length+Hand Wing Index+Migratory Distance	<0.001	0.327	270.491	2.256	0.027
Mean Crown Age.climate.stability	Prop. Range Size Sampled	Mean Crown Age ~ Range Size+CS Annual Temp.+CS Temp. Seasonality+CS Annual Precip.+CS Precip. Seasonality+Elevation+Tarsus Length+Hand Wing Index+Migratory Distance+Landscape Ruggedness	<0.001	0.323	272.533	4.297	0.01
Mean Crown Age.climate.stability	CS_bio_01	Mean Crown Age ~ Prop. Range Size Sampled+Range Size+CS Temp. Seasonality+CS Annual Precip.+CS Precip. Seasonality+Elevation+Tarsus Length+Hand Wing Index+Migratory Distance+Landscape Ruggedness	<0.001	0.272	282.853	14.618	0
Mean Crown Age.climate.stability	Range Size	Mean Crown Age ~ Prop. Range Size Sampled+CS Annual Temp.+CS Temp. Seasonality+CS Annual Precip.+CS Precip. Seasonality+Elevation+Tarsus Length+Hand Wing Index+Migratory Distance+Landscape Ruggedness	<0.001	0.152	316.748	48.513	0
Mean Crown Age.latitude	Migratory Distance	Mean Crown Age ~ Prop. Range Size Sampled+Range Size+Latitude Mid.+Elevation+Tarsus Length+Hand Wing Index+Landscape Ruggedness	<0.001	0.409	246.789	-2.153	0.24
Mean Crown Age.latitude	Tarsus Length	Mean Crown Age ~ Prop. Range Size Sampled+Range Size+Latitude Mid.+Elevation+Hand Wing Index+Migratory Distance+Landscape Ruggedness	<0.001	0.408	246.989	-1.953	0.217
Mean Crown Age.latitude	Elevation	Mean Crown Age ~ Prop. Range Size Sampled+Range Size+Latitude Mid.+Tarsus Length+Hand Wing Index+Migratory Distance+Landscape Ruggedness	<0.001	0.408	247.139	-1.803	0.202
Mean Crown Age.latitude	Landscape Ruggedness	Mean Crown Age ~ Prop. Range Size Sampled+Range Size+Latitude Mid.+Elevation+Tarsus Length+Hand Wing Index+Migratory Distance	<0.001	0.402	248.414	-0.529	0.107
Mean Crown Age.latitude	Hand Wing Index	Mean Crown Age ~ Prop. Range Size Sampled+Range Size+Latitude Mid.+Elevation+Tarsus Length+Migratory Distance+Landscape Ruggedness	<0.001	0.402	248.766	-0.177	0.089
Mean Crown Age.latitude	Full Model	Mean Crown Age ~ Prop. Range Size Sampled+Range Size+Latitude Mid.+Elevation+Tarsus Length+Hand Wing Index+Migratory Distance+Landscape Ruggedness	<0.001	0.406	248.942	0	0.082
Mean Crown Age.latitude	Prop. Range Size Sampled	Mean Crown Age ~ Range Size+Latitude Mid.+Elevation+Tarsus Length+Hand Wing Index+Migratory Distance+Landscape Ruggedness	<0.001	0.401	249.478	0.536	0.063
Mean Crown Age.latitude	Latitude Mid.	Mean Crown Age ~ Prop. Range Size Sampled+Range Size+Elevation+Tarsus Length+Hand Wing Index+Migratory Distance+Landscape Ruggedness	<0.001	0.255	289.147	40.204	0
Mean Crown Age.latitude	Range Size	Mean Crown Age ~ Prop. Range Size Sampled+Latitude Mid.+Elevation+Tarsus Length+Hand Wing Index+Migratory Distance+Landscape Ruggedness	<0.001	0.206	303.817	54.875	0
Mean Crown Age.climate.breadth	Elevation	Mean Crown Age ~ Prop. Range Size Sampled+Range Size+Annual Temp. Range+Temp. Seasonality Range+Annual Precip.+Precip. Seasonality+Tarsus Length+Hand Wing Index+Migratory Distance+Landscape Ruggedness	<0.001	0.391	254.369	-2.18	0.17
Mean Crown Age.climate.breadth	Migratory Distance	Mean Crown Age ~ Prop. Range Size Sampled+Range Size+Annual Temp. Range+Temp. Seasonality Range+Annual Precip.+Precip. Seasonality+Elevational Range+Tarsus Length+Hand Wing Index+Landscape Ruggedness	<0.001	0.391	254.438	-2.111	0.164
Mean Crown Age.climate.breadth	RANGE.bio4	Mean Crown Age ~ Prop. Range Size Sampled+Range Size+Annual Temp. Range+Annual Precip.+Precip. Seasonality+Elevational Range+Tarsus Length+Hand Wing Index+Migratory Distance+Landscape Ruggedness	<0.001	0.39	254.671	-1.879	0.146
Mean Crown Age.climate.breadth	RANGE.bio1	Mean Crown Age ~ Prop. Range Size Sampled+Range Size+Temp. Seasonality Range+Annual Precip.+Precip. Seasonality+Elevational Range+Tarsus Length+Hand Wing Index+Migratory Distance+Landscape Ruggedness	<0.001	0.392	254.708	-1.841	0.143
Mean Crown Age.climate.breadth	Tarsus Length	Mean Crown Age ~ Prop. Range Size Sampled+Range Size+Annual Temp. Range+Temp. Seasonality Range+Annual Precip.+Precip. Seasonality+Elevational Range+Hand Wing Index+Migratory Distance+Landscape Ruggedness	<0.001	0.391	254.899	-1.65	0.13
Mean Crown Age.climate.breadth	RANGE.bio15	Mean Crown Age ~ Prop. Range Size Sampled+Range Size+Annual Temp. Range+Temp. Seasonality Range+Annual Precip.+Elevational Range+Tarsus Length+Hand Wing Index+Migratory Distance+Landscape Ruggedness	<0.001	0.392	254.982	-1.568	0.125
Mean Crown Age.climate.breadth	Full Model	Mean Crown Age ~ Prop. Range Size Sampled+Range Size+Annual Temp. Range+Temp. Seasonality Range+Annual Precip.+Precip. Seasonality+Elevational Range+Tarsus Length+Hand Wing Index+Migratory Distance+Landscape Ruggedness	<0.001	0.389	256.55	0	0.057
Mean Crown Age.climate.breadth	Landscape Ruggedness	Mean Crown Age ~ Prop. Range Size Sampled+Range Size+Annual Temp. Range+Temp. Seasonality Range+Annual Precip.+Precip. Seasonality+Elevational Range+Tarsus Length+Hand Wing Index+Migratory Distance	<0.001	0.381	257.671	1.121	0.033
Mean Crown Age.climate.breadth	Hand Wing Index	Mean Crown Age ~ Prop. Range Size Sampled+Range Size+Annual Temp. Range+Temp. Seasonality Range+Annual Precip.+Precip. Seasonality+Elevational Range+Tarsus Length+Migratory Distance+Landscape Ruggedness	<0.001	0.373	258.8	2.25	0.019
Mean Crown Age.climate.breadth	Prop. Range Size Sampled	Mean Crown Age ~ Range Size+Annual Temp. Range+Temp. Seasonality Range+Annual Precip.+Precip. Seasonality+Elevational Range+Tarsus Length+Hand Wing Index+Migratory Distance+Landscape Ruggedness	<0.001	0.377	259.337	2.788	0.014
Mean Crown Age.climate.breadth	Range Size	Mean Crown Age ~ Prop. Range Size Sampled+Annual Temp. Range+Temp. Seasonality Range+Annual Precip.+Precip. Seasonality+Elevational Range+Tarsus Length+Hand Wing Index+Migratory Distance+Landscape Ruggedness	<0.001	0.273	287.756	31.206	0
Mean Crown Age.climate.breadth	RANGE.bio12	Mean Crown Age ~ Prop. Range Size Sampled+Range Size+Annual Temp. Range+Temp. Seasonality Range+Precip. Seasonality+Elevational Range+Tarsus Length+Hand Wing Index+Migratory Distance+Landscape Ruggedness	<0.001	0.268	289.248	32.699	0
Mean Crown Age.NPP	Migratory Distance	Mean Crown Age ~ Prop. Range Size Sampled+Range Size+NPP+Elevation+Tarsus Length+Hand Wing Index+Landscape Ruggedness	<0.001	0.379	255.284	-2.058	0.301
Mean Crown Age.NPP	Tarsus Length	Mean Crown Age ~ Prop. Range Size Sampled+Range Size+NPP+Elevation+Hand Wing Index+Migratory Distance+Landscape Ruggedness	<0.001	0.379	255.341	-2	0.293
Mean Crown Age.NPP	Landscape Ruggedness	Mean Crown Age ~ Prop. Range Size Sampled+Range Size+NPP+Elevation+Tarsus Length+Hand Wing Index+Migratory Distance	<0.001	0.372	257.184	-0.158	0.117
Mean Crown Age.NPP	Elevation	Mean Crown Age ~ Prop. Range Size Sampled+Range Size+NPP+Tarsus Length+Hand Wing Index+Migratory Distance+Landscape Ruggedness	<0.001	0.373	257.194	-0.148	0.116
Mean Crown Age.NPP	Full Model	Mean Crown Age ~ Prop. Range Size Sampled+Range Size+NPP+Elevation+Tarsus Length+Hand Wing Index+Migratory Distance+Landscape Ruggedness	<0.001	0.376	257.341	0	0.108
Mean Crown Age.NPP	Hand Wing Index	Mean Crown Age ~ Prop. Range Size Sampled+Range Size+NPP+Elevation+Tarsus Length+Migratory Distance+Landscape Ruggedness	<0.001	0.364	258.676	1.334	0.055
Mean Crown Age.NPP	Prop. Range Size Sampled	Mean Crown Age ~ Range Size+NPP+Elevation+Tarsus Length+Hand Wing Index+Migratory Distance+Landscape Ruggedness	<0.001	0.358	262.131	4.789	0.01
Mean Crown Age.NPP	NPP	Mean Crown Age ~ Prop. Range Size Sampled+Range Size+Elevation+Tarsus Length+Hand Wing Index+Migratory Distance+Landscape Ruggedness	<0.001	0.255	289.147	31.805	0
Mean Crown Age.NPP	Range Size	Mean Crown Age ~ Prop. Range Size Sampled+NPP+Elevation+Tarsus Length+Hand Wing Index+Migratory Distance+Landscape Ruggedness	<0.001	0.218	299.925	42.583	0
Mean Crown Age.pc1	Tarsus Length	Mean Crown Age ~ Prop. Range Size Sampled+Range Size+Bioclim PC1+Elevation+Hand Wing Index+Migratory Distance+Landscape Ruggedness	<0.001	0.39	251.261	-2.101	0.437
Mean Crown Age.pc1	Migratory Distance	Mean Crown Age ~ Prop. Range Size Sampled+Range Size+Bioclim PC1+Elevation+Tarsus Length+Hand Wing Index+Landscape Ruggedness	<0.001	0.384	252.882	-0.48	0.194
Mean Crown Age.pc1	Full Model	Mean Crown Age ~ Prop. Range Size Sampled+Range Size+Bioclim PC1+Elevation+Tarsus Length+Hand Wing Index+Migratory Distance+Landscape Ruggedness	<0.001	0.387	253.362	0	0.153
Mean Crown Age.pc1	Hand Wing Index	Mean Crown Age ~ Prop. Range Size Sampled+Range Size+Bioclim PC1+Elevation+Tarsus Length+Migratory Distance+Landscape Ruggedness	<0.001	0.378	254.324	0.962	0.094
Mean Crown Age.pc1	Landscape Ruggedness	Mean Crown Age ~ Prop. Range Size Sampled+Range Size+Bioclim PC1+Elevation+Tarsus Length+Hand Wing Index+Migratory Distance	<0.001	0.379	254.499	1.136	0.086
Mean Crown Age.pc1	Prop. Range Size Sampled	Mean Crown Age ~ Range Size+Bioclim PC1+Elevation+Tarsus Length+Hand Wing Index+Migratory Distance+Landscape Ruggedness	<0.001	0.374	256.569	3.207	0.031
Mean Crown Age.pc1	Elevation	Mean Crown Age ~ Prop. Range Size Sampled+Range Size+Bioclim PC1+Tarsus Length+Hand Wing Index+Migratory Distance+Landscape Ruggedness	<0.001	0.36	260.162	6.799	0.005
Mean Crown Age.pc1	Bioclim PC1	Mean Crown Age ~ Prop. Range Size Sampled+Range Size+Elevation+Tarsus Length+Hand Wing Index+Migratory Distance+Landscape Ruggedness	<0.001	0.256	288.583	35.22	0
Mean Crown Age.pc1	Range Size	Mean Crown Age ~ Prop. Range Size Sampled+Bioclim PC1+Elevation+Tarsus Length+Hand Wing Index+Migratory Distance+Landscape Ruggedness	<0.001	0.15	315.71	62.348	0
crown.rate.climate.breadth	RANGE.bio15	Crown Splitting Rate (0.9) ~ Prop. Range Size Sampled+Range Size+Annual Temp. Range+Temp. Seasonality Range+Annual Precip.+Elevational Range+Tarsus Length+Hand Wing Index+Migratory Distance+Landscape Ruggedness	0.122	0.026	252.551	-2.235	0.137
crown.rate.climate.breadth	Hand Wing Index	Crown Splitting Rate (0.9) ~ Prop. Range Size Sampled+Range Size+Annual Temp. Range+Temp. Seasonality Range+Annual Precip.+Precip. Seasonality+Elevational Range+Tarsus Length+Migratory Distance+Landscape Ruggedness	0.124	0.026	252.58	-2.206	0.135
crown.rate.climate.breadth	RANGE.bio4	Crown Splitting Rate (0.9) ~ Prop. Range Size Sampled+Range Size+Annual Temp. Range+Annual Precip.+Precip. Seasonality+Elevational Range+Tarsus Length+Hand Wing Index+Migratory Distance+Landscape Ruggedness	0.126	0.025	252.642	-2.144	0.131
crown.rate.climate.breadth	Migratory Distance	Crown Splitting Rate (0.9) ~ Prop. Range Size Sampled+Range Size+Annual Temp. Range+Temp. Seasonality Range+Annual Precip.+Precip. Seasonality+Elevational Range+Tarsus Length+Hand Wing Index+Landscape Ruggedness	0.135	0.024	252.904	-1.882	0.115
crown.rate.climate.breadth	Landscape Ruggedness	Crown Splitting Rate (0.9) ~ Prop. Range Size Sampled+Range Size+Annual Temp. Range+Temp. Seasonality Range+Annual Precip.+Precip. Seasonality+Elevational Range+Tarsus Length+Hand Wing Index+Migratory Distance	0.135	0.024	252.936	-1.85	0.113
crown.rate.climate.breadth	Range Size	Crown Splitting Rate (0.9) ~ Prop. Range Size Sampled+Annual Temp. Range+Temp. Seasonality Range+Annual Precip.+Precip. Seasonality+Elevational Range+Tarsus Length+Hand Wing Index+Migratory Distance+Landscape Ruggedness	0.148	0.023	253.253	-1.533	0.096
crown.rate.climate.breadth	RANGE.bio12	Crown Splitting Rate (0.9) ~ Prop. Range Size Sampled+Range Size+Annual Temp. Range+Temp. Seasonality Range+Precip. Seasonality+Elevational Range+Tarsus Length+Hand Wing Index+Migratory Distance+Landscape Ruggedness	0.157	0.022	253.491	-1.295	0.086
crown.rate.climate.breadth	Elevation	Crown Splitting Rate (0.9) ~ Prop. Range Size Sampled+Range Size+Annual Temp. Range+Temp. Seasonality Range+Annual Precip.+Precip. Seasonality+Tarsus Length+Hand Wing Index+Migratory Distance+Landscape Ruggedness	0.171	0.02	253.798	-0.988	0.073
crown.rate.climate.breadth	Full Model	Crown Splitting Rate (0.9) ~ Prop. Range Size Sampled+Range Size+Annual Temp. Range+Temp. Seasonality Range+Annual Precip.+Precip. Seasonality+Elevational Range+Tarsus Length+Hand Wing Index+Migratory Distance+Landscape Ruggedness	0.171	0.021	254.786	0	0.045
crown.rate.climate.breadth	RANGE.bio1	Crown Splitting Rate (0.9) ~ Prop. Range Size Sampled+Range Size+Temp. Seasonality Range+Annual Precip.+Precip. Seasonality+Elevational Range+Tarsus Length+Hand Wing Index+Migratory Distance+Landscape Ruggedness	0.234	0.014	255.068	0.282	0.039
crown.rate.climate.breadth	Tarsus Length	Crown Splitting Rate (0.9) ~ Prop. Range Size Sampled+Range Size+Annual Temp. Range+Temp. Seasonality Range+Annual Precip.+Precip. Seasonality+Elevational Range+Hand Wing Index+Migratory Distance+Landscape Ruggedness	0.274	0.011	255.812	1.026	0.027
crown.rate.climate.breadth	Prop. Range Size Sampled	Crown Splitting Rate (0.9) ~ Range Size+Annual Temp. Range+Temp. Seasonality Range+Annual Precip.+Precip. Seasonality+Elevational Range+Tarsus Length+Hand Wing Index+Migratory Distance+Landscape Ruggedness	0.608	-0.009	260.065	5.279	0.003
crown.rate.climate.stability	Landscape Ruggedness	Crown Splitting Rate (0.9) ~ Prop. Range Size Sampled+Range Size+CS Annual Temp.+CS Temp. Seasonality+CS Annual Precip.+CS Precip. Seasonality+Elevation+Tarsus Length+Hand Wing Index+Migratory Distance	0.092	0.031	252.055	-2.241	0.135
crown.rate.climate.stability	Hand Wing Index	Crown Splitting Rate (0.9) ~ Prop. Range Size Sampled+Range Size+CS Annual Temp.+CS Temp. Seasonality+CS Annual Precip.+CS Precip. Seasonality+Elevation+Tarsus Length+Migratory Distance+Landscape Ruggedness	0.09	0.031	252.061	-2.235	0.135
crown.rate.climate.stability	CS_bio_15	Crown Splitting Rate (0.9) ~ Prop. Range Size Sampled+Range Size+CS Annual Temp.+CS Temp. Seasonality+CS Annual Precip.+Elevation+Tarsus Length+Hand Wing Index+Migratory Distance+Landscape Ruggedness	0.095	0.03	252.076	-2.22	0.134
crown.rate.climate.stability	CS_bio_12	Crown Splitting Rate (0.9) ~ Prop. Range Size Sampled+Range Size+CS Annual Temp.+CS Temp. Seasonality+CS Precip. Seasonality+Elevation+Tarsus Length+Hand Wing Index+Migratory Distance+Landscape Ruggedness	0.096	0.03	252.125	-2.171	0.13
crown.rate.climate.stability	Migratory Distance	Crown Splitting Rate (0.9) ~ Prop. Range Size Sampled+Range Size+CS Annual Temp.+CS Temp. Seasonality+CS Annual Precip.+CS Precip. Seasonality+Elevation+Tarsus Length+Hand Wing Index+Landscape Ruggedness	0.073	0.035	252.514	-1.783	0.107
crown.rate.climate.stability	CS_bio_04	Crown Splitting Rate (0.9) ~ Prop. Range Size Sampled+Range Size+CS Annual Temp.+CS Annual Precip.+CS Precip. Seasonality+Elevation+Tarsus Length+Hand Wing Index+Migratory Distance+Landscape Ruggedness	0.11	0.028	252.559	-1.737	0.105
crown.rate.climate.stability	CS_bio_01	Crown Splitting Rate (0.9) ~ Prop. Range Size Sampled+Range Size+CS Temp. Seasonality+CS Annual Precip.+CS Precip. Seasonality+Elevation+Tarsus Length+Hand Wing Index+Migratory Distance+Landscape Ruggedness	0.14	0.024	253.321	-0.975	0.072
crown.rate.climate.stability	Elevation	Crown Splitting Rate (0.9) ~ Prop. Range Size Sampled+Range Size+CS Annual Temp.+CS Temp. Seasonality+CS Annual Precip.+CS Precip. Seasonality+Tarsus Length+Hand Wing Index+Migratory Distance+Landscape Ruggedness	0.16	0.021	253.832	-0.465	0.056
crown.rate.climate.stability	Tarsus Length	Crown Splitting Rate (0.9) ~ Prop. Range Size Sampled+Range Size+CS Annual Temp.+CS Temp. Seasonality+CS Annual Precip.+CS Precip. Seasonality+Elevation+Hand Wing Index+Migratory Distance+Landscape Ruggedness	0.112	0.028	254.03	-0.267	0.05
crown.rate.climate.stability	Full Model	Crown Splitting Rate (0.9) ~ Prop. Range Size Sampled+Range Size+CS Annual Temp.+CS Temp. Seasonality+CS Annual Precip.+CS Precip. Seasonality+Elevation+Tarsus Length+Hand Wing Index+Migratory Distance+Landscape Ruggedness	0.133	0.026	254.296	0	0.044
crown.rate.climate.stability	Range Size	Crown Splitting Rate (0.9) ~ Prop. Range Size Sampled+CS Annual Temp.+CS Temp. Seasonality+CS Annual Precip.+CS Precip. Seasonality+Elevation+Tarsus Length+Hand Wing Index+Migratory Distance+Landscape Ruggedness	0.148	0.023	255.092	0.796	0.03
crown.rate.climate.stability	Prop. Range Size Sampled	Crown Splitting Rate (0.9) ~ Range Size+CS Annual Temp.+CS Temp. Seasonality+CS Annual Precip.+CS Precip. Seasonality+Elevation+Tarsus Length+Hand Wing Index+Migratory Distance+Landscape Ruggedness	0.558	-0.006	259.483	5.187	0.003
crown.rate.lat	Migratory Distance	Crown Splitting Rate (0.9) ~ Prop. Range Size Sampled+Range Size+Latitude Mid.+Elevation+Tarsus Length+Hand Wing Index+Landscape Ruggedness	0.04	0.037	246.958	-2.15	0.2
crown.rate.lat	Hand Wing Index	Crown Splitting Rate (0.9) ~ Prop. Range Size Sampled+Range Size+Latitude Mid.+Elevation+Tarsus Length+Migratory Distance+Landscape Ruggedness	0.04	0.037	246.958	-2.149	0.2
crown.rate.lat	Landscape Ruggedness	Crown Splitting Rate (0.9) ~ Prop. Range Size Sampled+Range Size+Latitude Mid.+Elevation+Tarsus Length+Hand Wing Index+Migratory Distance	0.043	0.036	247.037	-2.071	0.192
crown.rate.lat	Latitude Mid.	Crown Splitting Rate (0.9) ~ Prop. Range Size Sampled+Range Size+Elevation+Tarsus Length+Hand Wing Index+Migratory Distance+Landscape Ruggedness	0.066	0.03	248.188	-0.919	0.108
crown.rate.lat	Tarsus Length	Crown Splitting Rate (0.9) ~ Prop. Range Size Sampled+Range Size+Latitude Mid.+Elevation+Hand Wing Index+Migratory Distance+Landscape Ruggedness	0.076	0.028	248.804	-0.304	0.079
crown.rate.lat	Elevation	Crown Splitting Rate (0.9) ~ Prop. Range Size Sampled+Range Size+Latitude Mid.+Tarsus Length+Hand Wing Index+Migratory Distance+Landscape Ruggedness	0.081	0.028	248.842	-0.266	0.078
crown.rate.lat	Full Model	Crown Splitting Rate (0.9) ~ Prop. Range Size Sampled+Range Size+Latitude Mid.+Elevation+Tarsus Length+Hand Wing Index+Migratory Distance+Landscape Ruggedness	0.067	0.032	249.108	0	0.068
crown.rate.lat	Range Size	Crown Splitting Rate (0.9) ~ Prop. Range Size Sampled+Latitude Mid.+Elevation+Tarsus Length+Hand Wing Index+Migratory Distance+Landscape Ruggedness	0.079	0.028	249.144	0.036	0.067
crown.rate.lat	Prop. Range Size Sampled	Crown Splitting Rate (0.9) ~ Range Size+Latitude Mid.+Elevation+Tarsus Length+Hand Wing Index+Migratory Distance+Landscape Ruggedness	0.338	0.005	253.693	4.585	0.007
crown.rate.NPP	Hand Wing Index	Crown Splitting Rate (0.9) ~ Prop. Range Size Sampled+Range Size+NPP+Elevation+Tarsus Length+Migratory Distance+Landscape Ruggedness	0.019	0.047	246.296	-2.159	0.206
crown.rate.NPP	Migratory Distance	Crown Splitting Rate (0.9) ~ Prop. Range Size Sampled+Range Size+NPP+Elevation+Tarsus Length+Hand Wing Index+Landscape Ruggedness	0.02	0.047	246.415	-2.04	0.194
crown.rate.NPP	Landscape Ruggedness	Crown Splitting Rate (0.9) ~ Prop. Range Size Sampled+Range Size+NPP+Elevation+Tarsus Length+Hand Wing Index+Migratory Distance	0.02	0.046	246.47	-1.986	0.189
crown.rate.NPP	Range Size	Crown Splitting Rate (0.9) ~ Prop. Range Size Sampled+NPP+Elevation+Tarsus Length+Hand Wing Index+Migratory Distance+Landscape Ruggedness	0.03	0.041	247.602	-0.853	0.107
crown.rate.NPP	NPP	Crown Splitting Rate (0.9) ~ Prop. Range Size Sampled+Range Size+Elevation+Tarsus Length+Hand Wing Index+Migratory Distance+Landscape Ruggedness	0.068	0.03	247.956	-0.5	0.09
crown.rate.NPP	Elevation	Crown Splitting Rate (0.9) ~ Prop. Range Size Sampled+Range Size+NPP+Tarsus Length+Hand Wing Index+Migratory Distance+Landscape Ruggedness	0.076	0.029	248.393	-0.062	0.072
crown.rate.NPP	Full Model	Crown Splitting Rate (0.9) ~ Prop. Range Size Sampled+Range Size+NPP+Elevation+Tarsus Length+Hand Wing Index+Migratory Distance+Landscape Ruggedness	0.032	0.043	248.455	0	0.07
crown.rate.NPP	Tarsus Length	Crown Splitting Rate (0.9) ~ Prop. Range Size Sampled+Range Size+NPP+Elevation+Hand Wing Index+Migratory Distance+Landscape Ruggedness	0.041	0.037	248.512	0.057	0.068
crown.rate.NPP	Prop. Range Size Sampled	Crown Splitting Rate (0.9) ~ Range Size+NPP+Elevation+Tarsus Length+Hand Wing Index+Migratory Distance+Landscape Ruggedness	0.399	0.002	254.027	5.572	0.004
crown.rate.pc1	Landscape Ruggedness	Crown Splitting Rate (0.9) ~ Prop. Range Size Sampled+Range Size+Bioclim PC1+Elevation+Tarsus Length+Hand Wing Index+Migratory Distance	0.051	0.034	247.551	-2.135	0.196
crown.rate.pc1	Hand Wing Index	Crown Splitting Rate (0.9) ~ Prop. Range Size Sampled+Range Size+Bioclim PC1+Elevation+Tarsus Length+Migratory Distance+Landscape Ruggedness	0.049	0.035	247.577	-2.109	0.193
crown.rate.pc1	Migratory Distance	Crown Splitting Rate (0.9) ~ Prop. Range Size Sampled+Range Size+Bioclim PC1+Elevation+Tarsus Length+Hand Wing Index+Landscape Ruggedness	0.051	0.034	247.592	-2.094	0.192
crown.rate.pc1	Bioclim PC1	Crown Splitting Rate (0.9) ~ Prop. Range Size Sampled+Range Size+Elevation+Tarsus Length+Hand Wing Index+Migratory Distance+Landscape Ruggedness	0.066	0.03	248.188	-1.498	0.142
crown.rate.pc1	Tarsus Length	Crown Splitting Rate (0.9) ~ Prop. Range Size Sampled+Range Size+Bioclim PC1+Elevation+Hand Wing Index+Migratory Distance+Landscape Ruggedness	0.088	0.026	249.188	-0.498	0.086
crown.rate.pc1	Full Model	Crown Splitting Rate (0.9) ~ Prop. Range Size Sampled+Range Size+Bioclim PC1+Elevation+Tarsus Length+Hand Wing Index+Migratory Distance+Landscape Ruggedness	0.081	0.03	249.686	0	0.067
crown.rate.pc1	Elevation	Crown Splitting Rate (0.9) ~ Prop. Range Size Sampled+Range Size+Bioclim PC1+Tarsus Length+Hand Wing Index+Migratory Distance+Landscape Ruggedness	0.114	0.023	249.9	0.213	0.061
crown.rate.pc1	Range Size	Crown Splitting Rate (0.9) ~ Prop. Range Size Sampled+Bioclim PC1+Elevation+Tarsus Length+Hand Wing Index+Migratory Distance+Landscape Ruggedness	0.109	0.023	250.024	0.338	0.057
crown.rate.pc1	Prop. Range Size Sampled	Crown Splitting Rate (0.9) ~ Range Size+Bioclim PC1+Elevation+Tarsus Length+Hand Wing Index+Migratory Distance+Landscape Ruggedness	0.438	0	254.71	5.024	0.005
phylog.struct.crown.climate.breadth	Hand Wing Index	Phylogeographic Structure (0.9) ~ Mean Crown Age+Prop. Range Size Sampled+Range Size+Annual Temp. Range+Temp. Seasonality Range+Annual Precip.+Precip. Seasonality+Elevational Range+Tarsus Length+Migratory Distance+Landscape Ruggedness	<0.001	0.397	302.475	-2.27	0.115
phylog.struct.crown.climate.breadth	Migratory Distance	Phylogeographic Structure (0.9) ~ Mean Crown Age+Prop. Range Size Sampled+Range Size+Annual Temp. Range+Temp. Seasonality Range+Annual Precip.+Precip. Seasonality+Elevational Range+Tarsus Length+Hand Wing Index+Landscape Ruggedness	<0.001	0.397	302.475	-2.27	0.115
phylog.struct.crown.climate.breadth	Elevation	Phylogeographic Structure (0.9) ~ Mean Crown Age+Prop. Range Size Sampled+Range Size+Annual Temp. Range+Temp. Seasonality Range+Annual Precip.+Precip. Seasonality+Tarsus Length+Hand Wing Index+Migratory Distance+Landscape Ruggedness	<0.001	0.397	302.512	-2.234	0.113
phylog.struct.crown.climate.breadth	Tarsus Length	Phylogeographic Structure (0.9) ~ Mean Crown Age+Prop. Range Size Sampled+Range Size+Annual Temp. Range+Temp. Seasonality Range+Annual Precip.+Precip. Seasonality+Elevational Range+Hand Wing Index+Migratory Distance+Landscape Ruggedness	<0.001	0.396	302.782	-1.963	0.099
phylog.struct.crown.climate.breadth	RANGE.bio4	Phylogeographic Structure (0.9) ~ Mean Crown Age+Prop. Range Size Sampled+Range Size+Annual Temp. Range+Annual Precip.+Precip. Seasonality+Elevational Range+Tarsus Length+Hand Wing Index+Migratory Distance+Landscape Ruggedness	<0.001	0.396	302.807	-1.939	0.098
phylog.struct.crown.climate.breadth	RANGE.bio12	Phylogeographic Structure (0.9) ~ Mean Crown Age+Prop. Range Size Sampled+Range Size+Annual Temp. Range+Temp. Seasonality Range+Precip. Seasonality+Elevational Range+Tarsus Length+Hand Wing Index+Migratory Distance+Landscape Ruggedness	<0.001	0.396	302.835	-1.91	0.096
phylog.struct.crown.climate.breadth	Range Size	Phylogeographic Structure (0.9) ~ Mean Crown Age+Prop. Range Size Sampled+Annual Temp. Range+Temp. Seasonality Range+Annual Precip.+Precip. Seasonality+Elevational Range+Tarsus Length+Hand Wing Index+Migratory Distance+Landscape Ruggedness	<0.001	0.396	302.931	-1.814	0.092
phylog.struct.crown.climate.breadth	Landscape Ruggedness	Phylogeographic Structure (0.9) ~ Mean Crown Age+Prop. Range Size Sampled+Range Size+Annual Temp. Range+Temp. Seasonality Range+Annual Precip.+Precip. Seasonality+Elevational Range+Tarsus Length+Hand Wing Index+Migratory Distance	<0.001	0.396	302.941	-1.805	0.091
phylog.struct.crown.climate.breadth	RANGE.bio15	Phylogeographic Structure (0.9) ~ Mean Crown Age+Prop. Range Size Sampled+Range Size+Annual Temp. Range+Temp. Seasonality Range+Annual Precip.+Elevational Range+Tarsus Length+Hand Wing Index+Migratory Distance+Landscape Ruggedness	<0.001	0.395	303.301	-1.444	0.076
phylog.struct.crown.climate.breadth	RANGE.bio1	Phylogeographic Structure (0.9) ~ Mean Crown Age+Prop. Range Size Sampled+Range Size+Temp. Seasonality Range+Annual Precip.+Precip. Seasonality+Elevational Range+Tarsus Length+Hand Wing Index+Migratory Distance+Landscape Ruggedness	<0.001	0.394	303.675	-1.07	0.063
phylog.struct.crown.climate.breadth	Full Model	Phylogeographic Structure (0.9) ~ Mean Crown Age+Prop. Range Size Sampled+Range Size+Annual Temp. Range+Temp. Seasonality Range+Annual Precip.+Precip. Seasonality+Elevational Range+Tarsus Length+Hand Wing Index+Migratory Distance+Landscape Ruggedness	<0.001	0.394	304.746	0	0.037
phylog.struct.crown.climate.breadth	Prop. Range Size Sampled	Phylogeographic Structure (0.9) ~ Mean Crown Age+Range Size+Annual Temp. Range+Temp. Seasonality Range+Annual Precip.+Precip. Seasonality+Elevational Range+Tarsus Length+Hand Wing Index+Migratory Distance+Landscape Ruggedness	<0.001	0.376	309.678	4.933	0.003
phylog.struct.crown.climate.breadth	Age	Phylogeographic Structure (0.9) ~ Prop. Range Size Sampled+Range Size+Annual Temp. Range+Temp. Seasonality Range+Annual Precip.+Precip. Seasonality+Elevational Range+Tarsus Length+Hand Wing Index+Migratory Distance+Landscape Ruggedness	<0.001	0.202	361.132	56.386	0
phylog.struct.crown.climate.stability	Migratory Distance	Phylogeographic Structure (0.9) ~ Mean Crown Age+Prop. Range Size Sampled+Range Size+CS Annual Temp.+CS Temp. Seasonality+CS Annual Precip.+CS Precip. Seasonality+Elevation+Tarsus Length+Hand Wing Index+Landscape Ruggedness	<0.001	0.399	301.86	-2.269	0.121
phylog.struct.crown.climate.stability	Tarsus Length	Phylogeographic Structure (0.9) ~ Mean Crown Age+Prop. Range Size Sampled+Range Size+CS Annual Temp.+CS Temp. Seasonality+CS Annual Precip.+CS Precip. Seasonality+Elevation+Hand Wing Index+Migratory Distance+Landscape Ruggedness	<0.001	0.399	301.864	-2.265	0.12
phylog.struct.crown.climate.stability	Landscape Ruggedness	Phylogeographic Structure (0.9) ~ Mean Crown Age+Prop. Range Size Sampled+Range Size+CS Annual Temp.+CS Temp. Seasonality+CS Annual Precip.+CS Precip. Seasonality+Elevation+Tarsus Length+Hand Wing Index+Migratory Distance	<0.001	0.399	301.878	-2.251	0.12
phylog.struct.crown.climate.stability	Hand Wing Index	Phylogeographic Structure (0.9) ~ Mean Crown Age+Prop. Range Size Sampled+Range Size+CS Annual Temp.+CS Temp. Seasonality+CS Annual Precip.+CS Precip. Seasonality+Elevation+Tarsus Length+Migratory Distance+Landscape Ruggedness	<0.001	0.399	301.886	-2.243	0.119
phylog.struct.crown.climate.stability	CS_bio_15	Phylogeographic Structure (0.9) ~ Mean Crown Age+Prop. Range Size Sampled+Range Size+CS Annual Temp.+CS Temp. Seasonality+CS Annual Precip.+Elevation+Tarsus Length+Hand Wing Index+Migratory Distance+Landscape Ruggedness	<0.001	0.399	301.893	-2.236	0.119
phylog.struct.crown.climate.stability	CS_bio_12	Phylogeographic Structure (0.9) ~ Mean Crown Age+Prop. Range Size Sampled+Range Size+CS Annual Temp.+CS Temp. Seasonality+CS Precip. Seasonality+Elevation+Tarsus Length+Hand Wing Index+Migratory Distance+Landscape Ruggedness	<0.001	0.399	302.068	-2.061	0.109
phylog.struct.crown.climate.stability	CS_bio_01	Phylogeographic Structure (0.9) ~ Mean Crown Age+Prop. Range Size Sampled+Range Size+CS Temp. Seasonality+CS Annual Precip.+CS Precip. Seasonality+Elevation+Tarsus Length+Hand Wing Index+Migratory Distance+Landscape Ruggedness	<0.001	0.398	302.08	-2.05	0.108
phylog.struct.crown.climate.stability	Range Size	Phylogeographic Structure (0.9) ~ Mean Crown Age+Prop. Range Size Sampled+CS Annual Temp.+CS Temp. Seasonality+CS Annual Precip.+CS Precip. Seasonality+Elevation+Tarsus Length+Hand Wing Index+Migratory Distance+Landscape Ruggedness	<0.001	0.394	303.594	-0.535	0.051
phylog.struct.crown.climate.stability	CS_bio_04	Phylogeographic Structure (0.9) ~ Mean Crown Age+Prop. Range Size Sampled+Range Size+CS Annual Temp.+CS Annual Precip.+CS Precip. Seasonality+Elevation+Tarsus Length+Hand Wing Index+Migratory Distance+Landscape Ruggedness	<0.001	0.394	303.709	-0.42	0.048
phylog.struct.crown.climate.stability	Elevation	Phylogeographic Structure (0.9) ~ Mean Crown Age+Prop. Range Size Sampled+Range Size+CS Annual Temp.+CS Temp. Seasonality+CS Annual Precip.+CS Precip. Seasonality+Tarsus Length+Hand Wing Index+Migratory Distance+Landscape Ruggedness	<0.001	0.393	303.898	-0.231	0.044
phylog.struct.crown.climate.stability	Full Model	Phylogeographic Structure (0.9) ~ Mean Crown Age+Prop. Range Size Sampled+Range Size+CS Annual Temp.+CS Temp. Seasonality+CS Annual Precip.+CS Precip. Seasonality+Elevation+Tarsus Length+Hand Wing Index+Migratory Distance+Landscape Ruggedness	<0.001	0.396	304.129	0	0.039
phylog.struct.crown.climate.stability	Prop. Range Size Sampled	Phylogeographic Structure (0.9) ~ Mean Crown Age+Range Size+CS Annual Temp.+CS Temp. Seasonality+CS Annual Precip.+CS Precip. Seasonality+Elevation+Tarsus Length+Hand Wing Index+Migratory Distance+Landscape Ruggedness	<0.001	0.378	309.197	5.068	0.003
phylog.struct.crown.climate.stability	Age	Phylogeographic Structure (0.9) ~ Prop. Range Size Sampled+Range Size+CS Annual Temp.+CS Temp. Seasonality+CS Annual Precip.+CS Precip. Seasonality+Elevation+Tarsus Length+Hand Wing Index+Migratory Distance+Landscape Ruggedness	<0.001	0.203	360.845	56.716	0
phylog.struct.crown.lat	Hand Wing Index	Phylogeographic Structure (0.9) ~ Mean Crown Age+Prop. Range Size Sampled+Range Size+Latitude Mid.+Elevation+Tarsus Length+Migratory Distance+Landscape Ruggedness	<0.001	0.407	295.632	-2.206	0.185
phylog.struct.crown.lat	Tarsus Length	Phylogeographic Structure (0.9) ~ Mean Crown Age+Prop. Range Size Sampled+Range Size+Latitude Mid.+Elevation+Hand Wing Index+Migratory Distance+Landscape Ruggedness	<0.001	0.407	295.642	-2.196	0.184
phylog.struct.crown.lat	Landscape Ruggedness	Phylogeographic Structure (0.9) ~ Mean Crown Age+Prop. Range Size Sampled+Range Size+Latitude Mid.+Elevation+Tarsus Length+Hand Wing Index+Migratory Distance	<0.001	0.406	295.769	-2.069	0.173
phylog.struct.crown.lat	Migratory Distance	Phylogeographic Structure (0.9) ~ Mean Crown Age+Prop. Range Size Sampled+Range Size+Latitude Mid.+Elevation+Tarsus Length+Hand Wing Index+Landscape Ruggedness	<0.001	0.406	295.825	-2.013	0.168
phylog.struct.crown.lat	Range Size	Phylogeographic Structure (0.9) ~ Mean Crown Age+Prop. Range Size Sampled+Latitude Mid.+Elevation+Tarsus Length+Hand Wing Index+Migratory Distance+Landscape Ruggedness	<0.001	0.403	296.939	-0.899	0.096
phylog.struct.crown.lat	Elevation	Phylogeographic Structure (0.9) ~ Mean Crown Age+Prop. Range Size Sampled+Range Size+Latitude Mid.+Tarsus Length+Hand Wing Index+Migratory Distance+Landscape Ruggedness	<0.001	0.402	297.323	-0.515	0.079
phylog.struct.crown.lat	Full Model	Phylogeographic Structure (0.9) ~ Mean Crown Age+Prop. Range Size Sampled+Range Size+Latitude Mid.+Elevation+Tarsus Length+Hand Wing Index+Migratory Distance+Landscape Ruggedness	<0.001	0.404	297.838	0	0.061
phylog.struct.crown.lat	Latitude Mid.	Phylogeographic Structure (0.9) ~ Mean Crown Age+Prop. Range Size Sampled+Range Size+Elevation+Tarsus Length+Hand Wing Index+Migratory Distance+Landscape Ruggedness	<0.001	0.399	298.278	0.44	0.049
phylog.struct.crown.lat	Prop. Range Size Sampled	Phylogeographic Structure (0.9) ~ Mean Crown Age+Range Size+Latitude Mid.+Elevation+Tarsus Length+Hand Wing Index+Migratory Distance+Landscape Ruggedness	<0.001	0.386	302.818	4.981	0.005
phylog.struct.crown.lat	Age	Phylogeographic Structure (0.9) ~ Prop. Range Size Sampled+Range Size+Latitude Mid.+Elevation+Tarsus Length+Hand Wing Index+Migratory Distance+Landscape Ruggedness	<0.001	0.219	353.187	55.349	0
phylog.struct.crown.NPP	Tarsus Length	Phylogeographic Structure (0.9) ~ Mean Crown Age+Prop. Range Size Sampled+Range Size+NPP+Elevation+Hand Wing Index+Migratory Distance+Landscape Ruggedness	<0.001	0.403	297.04	-2.207	0.172
phylog.struct.crown.NPP	Hand Wing Index	Phylogeographic Structure (0.9) ~ Mean Crown Age+Prop. Range Size Sampled+Range Size+NPP+Elevation+Tarsus Length+Migratory Distance+Landscape Ruggedness	<0.001	0.403	297.053	-2.193	0.171
phylog.struct.crown.NPP	Landscape Ruggedness	Phylogeographic Structure (0.9) ~ Mean Crown Age+Prop. Range Size Sampled+Range Size+NPP+Elevation+Tarsus Length+Hand Wing Index+Migratory Distance	<0.001	0.403	297.129	-2.117	0.165
phylog.struct.crown.NPP	Migratory Distance	Phylogeographic Structure (0.9) ~ Mean Crown Age+Prop. Range Size Sampled+Range Size+NPP+Elevation+Tarsus Length+Hand Wing Index+Landscape Ruggedness	<0.001	0.402	297.194	-2.052	0.16
phylog.struct.crown.NPP	Range Size	Phylogeographic Structure (0.9) ~ Mean Crown Age+Prop. Range Size Sampled+NPP+Elevation+Tarsus Length+Hand Wing Index+Migratory Distance+Landscape Ruggedness	<0.001	0.4	297.897	-1.35	0.112
phylog.struct.crown.NPP	NPP	Phylogeographic Structure (0.9) ~ Mean Crown Age+Prop. Range Size Sampled+Range Size+Elevation+Tarsus Length+Hand Wing Index+Migratory Distance+Landscape Ruggedness	<0.001	0.399	298.278	-0.969	0.093
phylog.struct.crown.NPP	Elevation	Phylogeographic Structure (0.9) ~ Mean Crown Age+Prop. Range Size Sampled+Range Size+NPP+Tarsus Length+Hand Wing Index+Migratory Distance+Landscape Ruggedness	<0.001	0.397	298.96	-0.287	0.066
phylog.struct.crown.NPP	Full Model	Phylogeographic Structure (0.9) ~ Mean Crown Age+Prop. Range Size Sampled+Range Size+NPP+Elevation+Tarsus Length+Hand Wing Index+Migratory Distance+Landscape Ruggedness	<0.001	0.4	299.247	0	0.057
phylog.struct.crown.NPP	Prop. Range Size Sampled	Phylogeographic Structure (0.9) ~ Mean Crown Age+Range Size+NPP+Elevation+Tarsus Length+Hand Wing Index+Migratory Distance+Landscape Ruggedness	<0.001	0.38	305.045	5.798	0.003
phylog.struct.crown.NPP	Age	Phylogeographic Structure (0.9) ~ Prop. Range Size Sampled+Range Size+NPP+Elevation+Tarsus Length+Hand Wing Index+Migratory Distance+Landscape Ruggedness	<0.001	0.198	358.646	59.399	0
phylog.struct.crown.pc1	Tarsus Length	Phylogeographic Structure (0.9) ~ Mean Crown Age+Prop. Range Size Sampled+Range Size+Bioclim PC1+Elevation+Hand Wing Index+Migratory Distance+Landscape Ruggedness	<0.001	0.403	296.976	-2.206	0.178
phylog.struct.crown.pc1	Hand Wing Index	Phylogeographic Structure (0.9) ~ Mean Crown Age+Prop. Range Size Sampled+Range Size+Bioclim PC1+Elevation+Tarsus Length+Migratory Distance+Landscape Ruggedness	<0.001	0.403	296.983	-2.198	0.177
phylog.struct.crown.pc1	Migratory Distance	Phylogeographic Structure (0.9) ~ Mean Crown Age+Prop. Range Size Sampled+Range Size+Bioclim PC1+Elevation+Tarsus Length+Hand Wing Index+Landscape Ruggedness	<0.001	0.403	297.028	-2.154	0.173
phylog.struct.crown.pc1	Landscape Ruggedness	Phylogeographic Structure (0.9) ~ Mean Crown Age+Prop. Range Size Sampled+Range Size+Bioclim PC1+Elevation+Tarsus Length+Hand Wing Index+Migratory Distance	<0.001	0.403	297.029	-2.152	0.173
phylog.struct.crown.pc1	Bioclim PC1	Phylogeographic Structure (0.9) ~ Mean Crown Age+Prop. Range Size Sampled+Range Size+Elevation+Tarsus Length+Hand Wing Index+Migratory Distance+Landscape Ruggedness	<0.001	0.399	298.278	-0.904	0.093
phylog.struct.crown.pc1	Range Size	Phylogeographic Structure (0.9) ~ Mean Crown Age+Prop. Range Size Sampled+Bioclim PC1+Elevation+Tarsus Length+Hand Wing Index+Migratory Distance+Landscape Ruggedness	<0.001	0.399	298.283	-0.899	0.093
phylog.struct.crown.pc1	Full Model	Phylogeographic Structure (0.9) ~ Mean Crown Age+Prop. Range Size Sampled+Range Size+Bioclim PC1+Elevation+Tarsus Length+Hand Wing Index+Migratory Distance+Landscape Ruggedness	<0.001	0.4	299.182	0	0.059
phylog.struct.crown.pc1	Elevation	Phylogeographic Structure (0.9) ~ Mean Crown Age+Prop. Range Size Sampled+Range Size+Bioclim PC1+Tarsus Length+Hand Wing Index+Migratory Distance+Landscape Ruggedness	<0.001	0.396	299.518	0.336	0.05
phylog.struct.crown.pc1	Prop. Range Size Sampled	Phylogeographic Structure (0.9) ~ Mean Crown Age+Range Size+Bioclim PC1+Elevation+Tarsus Length+Hand Wing Index+Migratory Distance+Landscape Ruggedness	<0.001	0.38	304.723	5.542	0.004
phylog.struct.crown.pc1	Age	Phylogeographic Structure (0.9) ~ Prop. Range Size Sampled+Range Size+Bioclim PC1+Elevation+Tarsus Length+Hand Wing Index+Migratory Distance+Landscape Ruggedness	<0.001	0.201	357.765	58.583	0
phylog.struct.stem.climate.breadth	Hand Wing Index	Phylogeographic Structure (0.9) ~ Mean Stem Age+Prop. Range Size Sampled+Range Size+Annual Temp. Range+Temp. Seasonality Range+Annual Precip.+Precip. Seasonality+Elevational Range+Tarsus Length+Migratory Distance+Landscape Ruggedness	<0.001	0.279	339.945	-2.175	0.148
phylog.struct.stem.climate.breadth	Elevation	Phylogeographic Structure (0.9) ~ Mean Stem Age+Prop. Range Size Sampled+Range Size+Annual Temp. Range+Temp. Seasonality Range+Annual Precip.+Precip. Seasonality+Tarsus Length+Hand Wing Index+Migratory Distance+Landscape Ruggedness	<0.001	0.279	340.07	-2.05	0.139
phylog.struct.stem.climate.breadth	Migratory Distance	Phylogeographic Structure (0.9) ~ Mean Stem Age+Prop. Range Size Sampled+Range Size+Annual Temp. Range+Temp. Seasonality Range+Annual Precip.+Precip. Seasonality+Elevational Range+Tarsus Length+Hand Wing Index+Landscape Ruggedness	<0.001	0.278	340.192	-1.928	0.131
phylog.struct.stem.climate.breadth	RANGE.bio1	Phylogeographic Structure (0.9) ~ Mean Stem Age+Prop. Range Size Sampled+Range Size+Temp. Seasonality Range+Annual Precip.+Precip. Seasonality+Elevational Range+Tarsus Length+Hand Wing Index+Migratory Distance+Landscape Ruggedness	<0.001	0.278	340.322	-1.798	0.123
phylog.struct.stem.climate.breadth	Tarsus Length	Phylogeographic Structure (0.9) ~ Mean Stem Age+Prop. Range Size Sampled+Range Size+Annual Temp. Range+Temp. Seasonality Range+Annual Precip.+Precip. Seasonality+Elevational Range+Hand Wing Index+Migratory Distance+Landscape Ruggedness	<0.001	0.276	340.729	-1.391	0.1
phylog.struct.stem.climate.breadth	RANGE.bio4	Phylogeographic Structure (0.9) ~ Mean Stem Age+Prop. Range Size Sampled+Range Size+Annual Temp. Range+Annual Precip.+Precip. Seasonality+Elevational Range+Tarsus Length+Hand Wing Index+Migratory Distance+Landscape Ruggedness	<0.001	0.276	340.93	-1.19	0.091
phylog.struct.stem.climate.breadth	RANGE.bio15	Phylogeographic Structure (0.9) ~ Mean Stem Age+Prop. Range Size Sampled+Range Size+Annual Temp. Range+Temp. Seasonality Range+Annual Precip.+Elevational Range+Tarsus Length+Hand Wing Index+Migratory Distance+Landscape Ruggedness	<0.001	0.275	341.008	-1.113	0.087
phylog.struct.stem.climate.breadth	Landscape Ruggedness	Phylogeographic Structure (0.9) ~ Mean Stem Age+Prop. Range Size Sampled+Range Size+Annual Temp. Range+Temp. Seasonality Range+Annual Precip.+Precip. Seasonality+Elevational Range+Tarsus Length+Hand Wing Index+Migratory Distance	<0.001	0.275	341.248	-0.872	0.077
phylog.struct.stem.climate.breadth	Full Model	Phylogeographic Structure (0.9) ~ Mean Stem Age+Prop. Range Size Sampled+Range Size+Annual Temp. Range+Temp. Seasonality Range+Annual Precip.+Precip. Seasonality+Elevational Range+Tarsus Length+Hand Wing Index+Migratory Distance+Landscape Ruggedness	<0.001	0.276	342.12	0	0.05
phylog.struct.stem.climate.breadth	Range Size	Phylogeographic Structure (0.9) ~ Mean Stem Age+Prop. Range Size Sampled+Annual Temp. Range+Temp. Seasonality Range+Annual Precip.+Precip. Seasonality+Elevational Range+Tarsus Length+Hand Wing Index+Migratory Distance+Landscape Ruggedness	<0.001	0.269	342.837	0.717	0.035
phylog.struct.stem.climate.breadth	RANGE.bio12	Phylogeographic Structure (0.9) ~ Mean Stem Age+Prop. Range Size Sampled+Range Size+Annual Temp. Range+Temp. Seasonality Range+Precip. Seasonality+Elevational Range+Tarsus Length+Hand Wing Index+Migratory Distance+Landscape Ruggedness	<0.001	0.264	344.201	2.081	0.018
phylog.struct.stem.climate.breadth	Prop. Range Size Sampled	Phylogeographic Structure (0.9) ~ Mean Stem Age+Range Size+Annual Temp. Range+Temp. Seasonality Range+Annual Precip.+Precip. Seasonality+Elevational Range+Tarsus Length+Hand Wing Index+Migratory Distance+Landscape Ruggedness	<0.001	0.247	349.046	6.926	0.002
phylog.struct.stem.climate.breadth	Age	Phylogeographic Structure (0.9) ~ Prop. Range Size Sampled+Range Size+Annual Temp. Range+Temp. Seasonality Range+Annual Precip.+Precip. Seasonality+Elevational Range+Tarsus Length+Hand Wing Index+Migratory Distance+Landscape Ruggedness	<0.001	0.202	361.132	19.011	0
phylog.struct.stem.climate.stability	CS_bio_15	Phylogeographic Structure (0.9) ~ Mean Stem Age+Prop. Range Size Sampled+Range Size+CS Annual Temp.+CS Temp. Seasonality+CS Annual Precip.+Elevation+Tarsus Length+Hand Wing Index+Migratory Distance+Landscape Ruggedness	<0.001	0.275	341.226	-2.181	0.152
phylog.struct.stem.climate.stability	Hand Wing Index	Phylogeographic Structure (0.9) ~ Mean Stem Age+Prop. Range Size Sampled+Range Size+CS Annual Temp.+CS Temp. Seasonality+CS Annual Precip.+CS Precip. Seasonality+Elevation+Tarsus Length+Migratory Distance+Landscape Ruggedness	<0.001	0.274	341.342	-2.065	0.144
phylog.struct.stem.climate.stability	Tarsus Length	Phylogeographic Structure (0.9) ~ Mean Stem Age+Prop. Range Size Sampled+Range Size+CS Annual Temp.+CS Temp. Seasonality+CS Annual Precip.+CS Precip. Seasonality+Elevation+Hand Wing Index+Migratory Distance+Landscape Ruggedness	<0.001	0.274	341.375	-2.032	0.141
phylog.struct.stem.climate.stability	Migratory Distance	Phylogeographic Structure (0.9) ~ Mean Stem Age+Prop. Range Size Sampled+Range Size+CS Annual Temp.+CS Temp. Seasonality+CS Annual Precip.+CS Precip. Seasonality+Elevation+Tarsus Length+Hand Wing Index+Landscape Ruggedness	<0.001	0.274	341.386	-2.021	0.14
phylog.struct.stem.climate.stability	Landscape Ruggedness	Phylogeographic Structure (0.9) ~ Mean Stem Age+Prop. Range Size Sampled+Range Size+CS Annual Temp.+CS Temp. Seasonality+CS Annual Precip.+CS Precip. Seasonality+Elevation+Tarsus Length+Hand Wing Index+Migratory Distance	<0.001	0.273	341.54	-1.867	0.13
phylog.struct.stem.climate.stability	CS_bio_12	Phylogeographic Structure (0.9) ~ Mean Stem Age+Prop. Range Size Sampled+Range Size+CS Annual Temp.+CS Temp. Seasonality+CS Precip. Seasonality+Elevation+Tarsus Length+Hand Wing Index+Migratory Distance+Landscape Ruggedness	<0.001	0.272	341.925	-1.482	0.107
phylog.struct.stem.climate.stability	CS_bio_01	Phylogeographic Structure (0.9) ~ Mean Stem Age+Prop. Range Size Sampled+Range Size+CS Temp. Seasonality+CS Annual Precip.+CS Precip. Seasonality+Elevation+Tarsus Length+Hand Wing Index+Migratory Distance+Landscape Ruggedness	<0.001	0.269	342.955	-0.452	0.064
phylog.struct.stem.climate.stability	Full Model	Phylogeographic Structure (0.9) ~ Mean Stem Age+Prop. Range Size Sampled+Range Size+CS Annual Temp.+CS Temp. Seasonality+CS Annual Precip.+CS Precip. Seasonality+Elevation+Tarsus Length+Hand Wing Index+Migratory Distance+Landscape Ruggedness	<0.001	0.271	343.407	0	0.051
phylog.struct.stem.climate.stability	Elevation	Phylogeographic Structure (0.9) ~ Mean Stem Age+Prop. Range Size Sampled+Range Size+CS Annual Temp.+CS Temp. Seasonality+CS Annual Precip.+CS Precip. Seasonality+Tarsus Length+Hand Wing Index+Migratory Distance+Landscape Ruggedness	<0.001	0.265	343.911	0.504	0.04
phylog.struct.stem.climate.stability	CS_bio_04	Phylogeographic Structure (0.9) ~ Mean Stem Age+Prop. Range Size Sampled+Range Size+CS Annual Temp.+CS Annual Precip.+CS Precip. Seasonality+Elevation+Tarsus Length+Hand Wing Index+Migratory Distance+Landscape Ruggedness	<0.001	0.262	344.696	1.289	0.027
phylog.struct.stem.climate.stability	Range Size	Phylogeographic Structure (0.9) ~ Mean Stem Age+Prop. Range Size Sampled+CS Annual Temp.+CS Temp. Seasonality+CS Annual Precip.+CS Precip. Seasonality+Elevation+Tarsus Length+Hand Wing Index+Migratory Distance+Landscape Ruggedness	<0.001	0.247	348.896	5.489	0.003
phylog.struct.stem.climate.stability	Prop. Range Size Sampled	Phylogeographic Structure (0.9) ~ Mean Stem Age+Range Size+CS Annual Temp.+CS Temp. Seasonality+CS Annual Precip.+CS Precip. Seasonality+Elevation+Tarsus Length+Hand Wing Index+Migratory Distance+Landscape Ruggedness	<0.001	0.237	351.76	8.353	0.001
phylog.struct.stem.climate.stability	Age	Phylogeographic Structure (0.9) ~ Prop. Range Size Sampled+Range Size+CS Annual Temp.+CS Temp. Seasonality+CS Annual Precip.+CS Precip. Seasonality+Elevation+Tarsus Length+Hand Wing Index+Migratory Distance+Landscape Ruggedness	<0.001	0.203	360.845	17.438	0
phylog.struct.stem.lat	Migratory Distance	Phylogeographic Structure (0.9) ~ Mean Stem Age+Prop. Range Size Sampled+Range Size+Latitude Mid.+Elevation+Tarsus Length+Hand Wing Index+Landscape Ruggedness	<0.001	0.294	332.144	-2.206	0.217
phylog.struct.stem.lat	Hand Wing Index	Phylogeographic Structure (0.9) ~ Mean Stem Age+Prop. Range Size Sampled+Range Size+Latitude Mid.+Elevation+Tarsus Length+Migratory Distance+Landscape Ruggedness	<0.001	0.294	332.145	-2.205	0.217
phylog.struct.stem.lat	Landscape Ruggedness	Phylogeographic Structure (0.9) ~ Mean Stem Age+Prop. Range Size Sampled+Range Size+Latitude Mid.+Elevation+Tarsus Length+Hand Wing Index+Migratory Distance	<0.001	0.294	332.155	-2.195	0.216
phylog.struct.stem.lat	Tarsus Length	Phylogeographic Structure (0.9) ~ Mean Stem Age+Prop. Range Size Sampled+Range Size+Latitude Mid.+Elevation+Hand Wing Index+Migratory Distance+Landscape Ruggedness	<0.001	0.292	332.512	-1.838	0.181
phylog.struct.stem.lat	Elevation	Phylogeographic Structure (0.9) ~ Mean Stem Age+Prop. Range Size Sampled+Range Size+Latitude Mid.+Tarsus Length+Hand Wing Index+Migratory Distance+Landscape Ruggedness	<0.001	0.287	333.986	-0.364	0.087
phylog.struct.stem.lat	Full Model	Phylogeographic Structure (0.9) ~ Mean Stem Age+Prop. Range Size Sampled+Range Size+Latitude Mid.+Elevation+Tarsus Length+Hand Wing Index+Migratory Distance+Landscape Ruggedness	<0.001	0.29	334.35	0	0.072
phylog.struct.stem.lat	Range Size	Phylogeographic Structure (0.9) ~ Mean Stem Age+Prop. Range Size Sampled+Latitude Mid.+Elevation+Tarsus Length+Hand Wing Index+Migratory Distance+Landscape Ruggedness	<0.001	0.27	339.068	4.719	0.007
phylog.struct.stem.lat	Prop. Range Size Sampled	Phylogeographic Structure (0.9) ~ Mean Stem Age+Range Size+Latitude Mid.+Elevation+Tarsus Length+Hand Wing Index+Migratory Distance+Landscape Ruggedness	<0.001	0.263	340.915	6.565	0.003
phylog.struct.stem.lat	Latitude Mid.	Phylogeographic Structure (0.9) ~ Mean Stem Age+Prop. Range Size Sampled+Range Size+Elevation+Tarsus Length+Hand Wing Index+Migratory Distance+Landscape Ruggedness	<0.001	0.251	344.341	9.991	0
phylog.struct.stem.lat	Age	Phylogeographic Structure (0.9) ~ Prop. Range Size Sampled+Range Size+Latitude Mid.+Elevation+Tarsus Length+Hand Wing Index+Migratory Distance+Landscape Ruggedness	<0.001	0.219	353.187	18.837	0
phylog.struct.stem.NPP	Migratory Distance	Phylogeographic Structure (0.9) ~ Mean Stem Age+Prop. Range Size Sampled+Range Size+NPP+Elevation+Tarsus Length+Hand Wing Index+Landscape Ruggedness	<0.001	0.276	337.18	-2.192	0.22
phylog.struct.stem.NPP	Landscape Ruggedness	Phylogeographic Structure (0.9) ~ Mean Stem Age+Prop. Range Size Sampled+Range Size+NPP+Elevation+Tarsus Length+Hand Wing Index+Migratory Distance	<0.001	0.276	337.25	-2.123	0.212
phylog.struct.stem.NPP	Hand Wing Index	Phylogeographic Structure (0.9) ~ Mean Stem Age+Prop. Range Size Sampled+Range Size+NPP+Elevation+Tarsus Length+Migratory Distance+Landscape Ruggedness	<0.001	0.276	337.27	-2.102	0.21
phylog.struct.stem.NPP	Tarsus Length	Phylogeographic Structure (0.9) ~ Mean Stem Age+Prop. Range Size Sampled+Range Size+NPP+Elevation+Hand Wing Index+Migratory Distance+Landscape Ruggedness	<0.001	0.276	337.403	-1.97	0.196
phylog.struct.stem.NPP	Full Model	Phylogeographic Structure (0.9) ~ Mean Stem Age+Prop. Range Size Sampled+Range Size+NPP+Elevation+Tarsus Length+Hand Wing Index+Migratory Distance+Landscape Ruggedness	<0.001	0.273	339.372	0	0.073
phylog.struct.stem.NPP	Elevation	Phylogeographic Structure (0.9) ~ Mean Stem Age+Prop. Range Size Sampled+Range Size+NPP+Tarsus Length+Hand Wing Index+Migratory Distance+Landscape Ruggedness	<0.001	0.268	339.627	0.255	0.065
phylog.struct.stem.NPP	Range Size	Phylogeographic Structure (0.9) ~ Mean Stem Age+Prop. Range Size Sampled+NPP+Elevation+Tarsus Length+Hand Wing Index+Migratory Distance+Landscape Ruggedness	<0.001	0.258	342.304	2.931	0.017
phylog.struct.stem.NPP	NPP	Phylogeographic Structure (0.9) ~ Mean Stem Age+Prop. Range Size Sampled+Range Size+Elevation+Tarsus Length+Hand Wing Index+Migratory Distance+Landscape Ruggedness	<0.001	0.251	344.341	4.969	0.006
phylog.struct.stem.NPP	Prop. Range Size Sampled	Phylogeographic Structure (0.9) ~ Mean Stem Age+Range Size+NPP+Elevation+Tarsus Length+Hand Wing Index+Migratory Distance+Landscape Ruggedness	<0.001	0.236	348.556	9.184	0.001
phylog.struct.stem.NPP	Age	Phylogeographic Structure (0.9) ~ Prop. Range Size Sampled+Range Size+NPP+Elevation+Tarsus Length+Hand Wing Index+Migratory Distance+Landscape Ruggedness	<0.001	0.198	358.646	19.274	0
phylog.struct.stem.pc1	Hand Wing Index	Phylogeographic Structure (0.9) ~ Mean Stem Age+Prop. Range Size Sampled+Range Size+Bioclim PC1+Elevation+Tarsus Length+Migratory Distance+Landscape Ruggedness	<0.001	0.28	336.228	-2.148	0.235
phylog.struct.stem.pc1	Tarsus Length	Phylogeographic Structure (0.9) ~ Mean Stem Age+Prop. Range Size Sampled+Range Size+Bioclim PC1+Elevation+Hand Wing Index+Migratory Distance+Landscape Ruggedness	<0.001	0.279	336.355	-2.021	0.22
phylog.struct.stem.pc1	Landscape Ruggedness	Phylogeographic Structure (0.9) ~ Mean Stem Age+Prop. Range Size Sampled+Range Size+Bioclim PC1+Elevation+Tarsus Length+Hand Wing Index+Migratory Distance	<0.001	0.279	336.362	-2.014	0.219
phylog.struct.stem.pc1	Migratory Distance	Phylogeographic Structure (0.9) ~ Mean Stem Age+Prop. Range Size Sampled+Range Size+Bioclim PC1+Elevation+Tarsus Length+Hand Wing Index+Landscape Ruggedness	<0.001	0.279	336.424	-1.951	0.213
phylog.struct.stem.pc1	Full Model	Phylogeographic Structure (0.9) ~ Mean Stem Age+Prop. Range Size Sampled+Range Size+Bioclim PC1+Elevation+Tarsus Length+Hand Wing Index+Migratory Distance+Landscape Ruggedness	<0.001	0.276	338.376	0	0.08
phylog.struct.stem.pc1	Elevation	Phylogeographic Structure (0.9) ~ Mean Stem Age+Prop. Range Size Sampled+Range Size+Bioclim PC1+Tarsus Length+Hand Wing Index+Migratory Distance+Landscape Ruggedness	<0.001	0.263	340.904	2.528	0.023
phylog.struct.stem.pc1	Range Size	Phylogeographic Structure (0.9) ~ Mean Stem Age+Prop. Range Size Sampled+Bioclim PC1+Elevation+Tarsus Length+Hand Wing Index+Migratory Distance+Landscape Ruggedness	<0.001	0.252	344.052	5.676	0.005
phylog.struct.stem.pc1	Bioclim PC1	Phylogeographic Structure (0.9) ~ Mean Stem Age+Prop. Range Size Sampled+Range Size+Elevation+Tarsus Length+Hand Wing Index+Migratory Distance+Landscape Ruggedness	<0.001	0.251	344.341	5.965	0.004
phylog.struct.stem.pc1	Prop. Range Size Sampled	Phylogeographic Structure (0.9) ~ Mean Stem Age+Range Size+Bioclim PC1+Elevation+Tarsus Length+Hand Wing Index+Migratory Distance+Landscape Ruggedness	<0.001	0.243	346.68	8.304	0.001
phylog.struct.stem.pc1	Age	Phylogeographic Structure (0.9) ~ Prop. Range Size Sampled+Range Size+Bioclim PC1+Elevation+Tarsus Length+Hand Wing Index+Migratory Distance+Landscape Ruggedness	<0.001	0.201	357.765	19.389	0
lineage.loss.climate.breadth	Hand Wing Index	LineAge Loss ~ Prop. Range Size Sampled+Range Size+Annual Temp. Range+Temp. Seasonality Range+Annual Precip.+Precip. Seasonality+Elevational Range+Tarsus Length+Migratory Distance+Landscape Ruggedness	<0.001	0.15	-58.272	-2.25	0.287
lineage.loss.climate.breadth	RANGE.bio15	LineAge Loss ~ Prop. Range Size Sampled+Range Size+Annual Temp. Range+Temp. Seasonality Range+Annual Precip.+Elevational Range+Tarsus Length+Hand Wing Index+Migratory Distance+Landscape Ruggedness	<0.001	0.143	-56.657	-0.635	0.128
lineage.loss.climate.breadth	RANGE.bio1	LineAge Loss ~ Prop. Range Size Sampled+Range Size+Temp. Seasonality Range+Annual Precip.+Precip. Seasonality+Elevational Range+Tarsus Length+Hand Wing Index+Migratory Distance+Landscape Ruggedness	<0.001	0.142	-56.265	-0.243	0.105
lineage.loss.climate.breadth	Full Model	LineAge Loss ~ Prop. Range Size Sampled+Range Size+Annual Temp. Range+Temp. Seasonality Range+Annual Precip.+Precip. Seasonality+Elevational Range+Tarsus Length+Hand Wing Index+Migratory Distance+Landscape Ruggedness	<0.001	0.146	-56.022	0	0.093
lineage.loss.climate.breadth	Prop. Range Size Sampled	LineAge Loss ~ Range Size+Annual Temp. Range+Temp. Seasonality Range+Annual Precip.+Precip. Seasonality+Elevational Range+Tarsus Length+Hand Wing Index+Migratory Distance+Landscape Ruggedness	<0.001	0.14	-55.686	0.336	0.079
lineage.loss.climate.breadth	Tarsus Length	LineAge Loss ~ Prop. Range Size Sampled+Range Size+Annual Temp. Range+Temp. Seasonality Range+Annual Precip.+Precip. Seasonality+Elevational Range+Hand Wing Index+Migratory Distance+Landscape Ruggedness	<0.001	0.139	-55.536	0.486	0.073
lineage.loss.climate.breadth	Landscape Ruggedness	LineAge Loss ~ Prop. Range Size Sampled+Range Size+Annual Temp. Range+Temp. Seasonality Range+Annual Precip.+Precip. Seasonality+Elevational Range+Tarsus Length+Hand Wing Index+Migratory Distance	<0.001	0.138	-55.374	0.647	0.067
lineage.loss.climate.breadth	RANGE.bio4	LineAge Loss ~ Prop. Range Size Sampled+Range Size+Annual Temp. Range+Annual Precip.+Precip. Seasonality+Elevational Range+Tarsus Length+Hand Wing Index+Migratory Distance+Landscape Ruggedness	<0.001	0.136	-54.843	1.178	0.052
lineage.loss.climate.breadth	Elevation	LineAge Loss ~ Prop. Range Size Sampled+Range Size+Annual Temp. Range+Temp. Seasonality Range+Annual Precip.+Precip. Seasonality+Tarsus Length+Hand Wing Index+Migratory Distance+Landscape Ruggedness	<0.001	0.135	-54.606	1.415	0.046
lineage.loss.climate.breadth	Migratory Distance	LineAge Loss ~ Prop. Range Size Sampled+Range Size+Annual Temp. Range+Temp. Seasonality Range+Annual Precip.+Precip. Seasonality+Elevational Range+Tarsus Length+Hand Wing Index+Landscape Ruggedness	<0.001	0.135	-54.527	1.495	0.044
lineage.loss.climate.breadth	Range Size	LineAge Loss ~ Prop. Range Size Sampled+Annual Temp. Range+Temp. Seasonality Range+Annual Precip.+Precip. Seasonality+Elevational Range+Tarsus Length+Hand Wing Index+Migratory Distance+Landscape Ruggedness	<0.001	0.129	-53.141	2.88	0.022
lineage.loss.climate.breadth	RANGE.bio12	LineAge Loss ~ Prop. Range Size Sampled+Range Size+Annual Temp. Range+Temp. Seasonality Range+Precip. Seasonality+Elevational Range+Tarsus Length+Hand Wing Index+Migratory Distance+Landscape Ruggedness	<0.001	0.113	-49.415	6.606	0.003
lineage.loss.climate.stability	Hand Wing Index	LineAge Loss ~ Prop. Range Size Sampled+Range Size+CS Annual Temp.+CS Temp. Seasonality+CS Annual Precip.+CS Precip. Seasonality+Elevation+Tarsus Length+Migratory Distance+Landscape Ruggedness	<0.001	0.109	-48.377	-2.152	0.239
lineage.loss.climate.stability	CS_bio_12	LineAge Loss ~ Prop. Range Size Sampled+Range Size+CS Annual Temp.+CS Temp. Seasonality+CS Precip. Seasonality+Elevation+Tarsus Length+Hand Wing Index+Migratory Distance+Landscape Ruggedness	<0.001	0.108	-48.224	-1.999	0.222
lineage.loss.climate.stability	Elevation	LineAge Loss ~ Prop. Range Size Sampled+Range Size+CS Annual Temp.+CS Temp. Seasonality+CS Annual Precip.+CS Precip. Seasonality+Tarsus Length+Hand Wing Index+Migratory Distance+Landscape Ruggedness	<0.001	0.103	-47.03	-0.805	0.122
lineage.loss.climate.stability	CS_bio_15	LineAge Loss ~ Prop. Range Size Sampled+Range Size+CS Annual Temp.+CS Temp. Seasonality+CS Annual Precip.+Elevation+Tarsus Length+Hand Wing Index+Migratory Distance+Landscape Ruggedness	<0.001	0.102	-46.795	-0.571	0.108
lineage.loss.climate.stability	Full Model	LineAge Loss ~ Prop. Range Size Sampled+Range Size+CS Annual Temp.+CS Temp. Seasonality+CS Annual Precip.+CS Precip. Seasonality+Elevation+Tarsus Length+Hand Wing Index+Migratory Distance+Landscape Ruggedness	<0.001	0.105	-46.225	0	0.082
lineage.loss.climate.stability	CS_bio_01	LineAge Loss ~ Prop. Range Size Sampled+Range Size+CS Temp. Seasonality+CS Annual Precip.+CS Precip. Seasonality+Elevation+Tarsus Length+Hand Wing Index+Migratory Distance+Landscape Ruggedness	0.001	0.097	-45.567	0.658	0.059
lineage.loss.climate.stability	Tarsus Length	LineAge Loss ~ Prop. Range Size Sampled+Range Size+CS Annual Temp.+CS Temp. Seasonality+CS Annual Precip.+CS Precip. Seasonality+Elevation+Hand Wing Index+Migratory Distance+Landscape Ruggedness	0.001	0.096	-45.371	0.854	0.053
lineage.loss.climate.stability	CS_bio_04	LineAge Loss ~ Prop. Range Size Sampled+Range Size+CS Annual Temp.+CS Annual Precip.+CS Precip. Seasonality+Elevation+Tarsus Length+Hand Wing Index+Migratory Distance+Landscape Ruggedness	0.001	0.093	-44.747	1.478	0.039
lineage.loss.climate.stability	Prop. Range Size Sampled	LineAge Loss ~ Range Size+CS Annual Temp.+CS Temp. Seasonality+CS Annual Precip.+CS Precip. Seasonality+Elevation+Tarsus Length+Hand Wing Index+Migratory Distance+Landscape Ruggedness	0.001	0.09	-43.975	2.25	0.026
lineage.loss.climate.stability	Migratory Distance	LineAge Loss ~ Prop. Range Size Sampled+Range Size+CS Annual Temp.+CS Temp. Seasonality+CS Annual Precip.+CS Precip. Seasonality+Elevation+Tarsus Length+Hand Wing Index+Landscape Ruggedness	0.001	0.09	-43.926	2.299	0.026
lineage.loss.climate.stability	Landscape Ruggedness	LineAge Loss ~ Prop. Range Size Sampled+Range Size+CS Annual Temp.+CS Temp. Seasonality+CS Annual Precip.+CS Precip. Seasonality+Elevation+Tarsus Length+Hand Wing Index+Migratory Distance	0.001	0.089	-43.654	2.571	0.023
lineage.loss.climate.stability	Range Size	LineAge Loss ~ Prop. Range Size Sampled+CS Annual Temp.+CS Temp. Seasonality+CS Annual Precip.+CS Precip. Seasonality+Elevation+Tarsus Length+Hand Wing Index+Migratory Distance+Landscape Ruggedness	0.01	0.063	-37.993	8.232	0.001
lineage.loss.latitude	Elevation	LineAge Loss ~ Prop. Range Size Sampled+Range Size+Latitude Mid.+Tarsus Length+Hand Wing Index+Migratory Distance+Landscape Ruggedness	<0.001	0.149	-61.411	-1.548	0.266
lineage.loss.latitude	Hand Wing Index	LineAge Loss ~ Prop. Range Size Sampled+Range Size+Latitude Mid.+Elevation+Tarsus Length+Migratory Distance+Landscape Ruggedness	<0.001	0.149	-61.373	-1.51	0.261
lineage.loss.latitude	Landscape Ruggedness	LineAge Loss ~ Prop. Range Size Sampled+Range Size+Latitude Mid.+Elevation+Tarsus Length+Hand Wing Index+Migratory Distance	<0.001	0.144	-60.168	-0.306	0.143
lineage.loss.latitude	Full Model	LineAge Loss ~ Prop. Range Size Sampled+Range Size+Latitude Mid.+Elevation+Tarsus Length+Hand Wing Index+Migratory Distance+Landscape Ruggedness	<0.001	0.147	-59.863	0	0.123
lineage.loss.latitude	Prop. Range Size Sampled	LineAge Loss ~ Range Size+Latitude Mid.+Elevation+Tarsus Length+Hand Wing Index+Migratory Distance+Landscape Ruggedness	<0.001	0.141	-59.457	0.405	0.1
lineage.loss.latitude	Migratory Distance	LineAge Loss ~ Prop. Range Size Sampled+Range Size+Latitude Mid.+Elevation+Tarsus Length+Hand Wing Index+Landscape Ruggedness	<0.001	0.137	-58.478	1.385	0.061
lineage.loss.latitude	Tarsus Length	LineAge Loss ~ Prop. Range Size Sampled+Range Size+Latitude Mid.+Elevation+Hand Wing Index+Migratory Distance+Landscape Ruggedness	<0.001	0.134	-57.761	2.102	0.043
lineage.loss.latitude	Range Size	LineAge Loss ~ Prop. Range Size Sampled+Latitude Mid.+Elevation+Tarsus Length+Hand Wing Index+Migratory Distance+Landscape Ruggedness	<0.001	0.105	-50.921	8.942	0.001
lineage.loss.latitude	Latitude Mid.	LineAge Loss ~ Prop. Range Size Sampled+Range Size+Elevation+Tarsus Length+Hand Wing Index+Migratory Distance+Landscape Ruggedness	0.001	0.084	-44.587	15.276	0
lineage.loss.NPP	Hand Wing Index	LineAge Loss ~ Prop. Range Size Sampled+Range Size+NPP+Elevation+Tarsus Length+Migratory Distance+Landscape Ruggedness	<0.001	0.119	-54.275	-1.977	0.363
lineage.loss.NPP	Elevation	LineAge Loss ~ Prop. Range Size Sampled+Range Size+NPP+Tarsus Length+Hand Wing Index+Migratory Distance+Landscape Ruggedness	<0.001	0.115	-53.275	-0.976	0.22
lineage.loss.NPP	Full Model	LineAge Loss ~ Prop. Range Size Sampled+Range Size+NPP+Elevation+Tarsus Length+Hand Wing Index+Migratory Distance+Landscape Ruggedness	<0.001	0.116	-52.299	0	0.135
lineage.loss.NPP	Landscape Ruggedness	LineAge Loss ~ Prop. Range Size Sampled+Range Size+NPP+Elevation+Tarsus Length+Hand Wing Index+Migratory Distance	<0.001	0.109	-51.954	0.344	0.114
lineage.loss.NPP	Tarsus Length	LineAge Loss ~ Prop. Range Size Sampled+Range Size+NPP+Elevation+Hand Wing Index+Migratory Distance+Landscape Ruggedness	<0.001	0.104	-50.806	1.493	0.064
lineage.loss.NPP	Migratory Distance	LineAge Loss ~ Prop. Range Size Sampled+Range Size+NPP+Elevation+Tarsus Length+Hand Wing Index+Landscape Ruggedness	<0.001	0.104	-50.63	1.668	0.059
lineage.loss.NPP	Prop. Range Size Sampled	LineAge Loss ~ Range Size+NPP+Elevation+Tarsus Length+Hand Wing Index+Migratory Distance+Landscape Ruggedness	<0.001	0.099	-49.543	2.756	0.034
lineage.loss.NPP	Range Size	LineAge Loss ~ Prop. Range Size Sampled+NPP+Elevation+Tarsus Length+Hand Wing Index+Migratory Distance+Landscape Ruggedness	0.001	0.086	-46.496	5.803	0.007
lineage.loss.NPP	NPP	LineAge Loss ~ Prop. Range Size Sampled+Range Size+Elevation+Tarsus Length+Hand Wing Index+Migratory Distance+Landscape Ruggedness	0.001	0.085	-44.884	7.415	0.003
lineage.loss.pc1	Hand Wing Index	LineAge Loss ~ Prop. Range Size Sampled+Range Size+Bioclim PC1+Elevation+Tarsus Length+Migratory Distance+Landscape Ruggedness	<0.001	0.131	-57.151	-1.83	0.456
lineage.loss.pc1	Full Model	LineAge Loss ~ Prop. Range Size Sampled+Range Size+Bioclim PC1+Elevation+Tarsus Length+Hand Wing Index+Migratory Distance+Landscape Ruggedness	<0.001	0.128	-55.32	0	0.183
lineage.loss.pc1	Landscape Ruggedness	LineAge Loss ~ Prop. Range Size Sampled+Range Size+Bioclim PC1+Elevation+Tarsus Length+Hand Wing Index+Migratory Distance	<0.001	0.119	-54.241	1.079	0.107
lineage.loss.pc1	Tarsus Length	LineAge Loss ~ Prop. Range Size Sampled+Range Size+Bioclim PC1+Elevation+Hand Wing Index+Migratory Distance+Landscape Ruggedness	<0.001	0.117	-53.873	1.448	0.089
lineage.loss.pc1	Elevation	LineAge Loss ~ Prop. Range Size Sampled+Range Size+Bioclim PC1+Tarsus Length+Hand Wing Index+Migratory Distance+Landscape Ruggedness	<0.001	0.115	-53.407	1.913	0.07
lineage.loss.pc1	Prop. Range Size Sampled	LineAge Loss ~ Range Size+Bioclim PC1+Elevation+Tarsus Length+Hand Wing Index+Migratory Distance+Landscape Ruggedness	<0.001	0.115	-53.376	1.944	0.069
lineage.loss.pc1	Migratory Distance	LineAge Loss ~ Prop. Range Size Sampled+Range Size+Bioclim PC1+Elevation+Tarsus Length+Hand Wing Index+Landscape Ruggedness	<0.001	0.107	-51.37	3.95	0.025
lineage.loss.pc1	Range Size	LineAge Loss ~ Prop. Range Size Sampled+Bioclim PC1+Elevation+Tarsus Length+Hand Wing Index+Migratory Distance+Landscape Ruggedness	0.002	0.074	-43.89	11.43	0.001
lineage.loss.pc1	Bioclim PC1	LineAge Loss ~ Prop. Range Size Sampled+Range Size+Elevation+Tarsus Length+Hand Wing Index+Migratory Distance+Landscape Ruggedness	0.006	0.062	-41.095	14.225	0
Mean Stem Age.climate.breadth	Tarsus Length	Mean Stem Age ~ Prop. Range Size Sampled+Range Size+Annual Temp. Range+Temp. Seasonality Range+Annual Precip.+Precip. Seasonality+Elevational Range+Hand Wing Index+Migratory Distance+Landscape Ruggedness	<0.001	0.305	330.248	-2.224	0.222
Mean Stem Age.climate.breadth	Landscape Ruggedness	Mean Stem Age ~ Prop. Range Size Sampled+Range Size+Annual Temp. Range+Temp. Seasonality Range+Annual Precip.+Precip. Seasonality+Elevational Range+Tarsus Length+Hand Wing Index+Migratory Distance	<0.001	0.305	330.401	-2.072	0.206
Mean Stem Age.climate.breadth	RANGE.bio4	Mean Stem Age ~ Prop. Range Size Sampled+Range Size+Annual Temp. Range+Annual Precip.+Precip. Seasonality+Elevational Range+Tarsus Length+Hand Wing Index+Migratory Distance+Landscape Ruggedness	<0.001	0.305	330.41	-2.063	0.205
Mean Stem Age.climate.breadth	Migratory Distance	Mean Stem Age ~ Prop. Range Size Sampled+Range Size+Annual Temp. Range+Temp. Seasonality Range+Annual Precip.+Precip. Seasonality+Elevational Range+Tarsus Length+Hand Wing Index+Landscape Ruggedness	<0.001	0.301	331.595	-0.878	0.113
Mean Stem Age.climate.breadth	Full Model	Mean Stem Age ~ Prop. Range Size Sampled+Range Size+Annual Temp. Range+Temp. Seasonality Range+Annual Precip.+Precip. Seasonality+Elevational Range+Tarsus Length+Hand Wing Index+Migratory Distance+Landscape Ruggedness	<0.001	0.302	332.473	0	0.073
Mean Stem Age.climate.breadth	Prop. Range Size Sampled	Mean Stem Age ~ Range Size+Annual Temp. Range+Temp. Seasonality Range+Annual Precip.+Precip. Seasonality+Elevational Range+Tarsus Length+Hand Wing Index+Migratory Distance+Landscape Ruggedness	<0.001	0.296	333.113	0.641	0.053
Mean Stem Age.climate.breadth	Hand Wing Index	Mean Stem Age ~ Prop. Range Size Sampled+Range Size+Annual Temp. Range+Temp. Seasonality Range+Annual Precip.+Precip. Seasonality+Elevational Range+Tarsus Length+Migratory Distance+Landscape Ruggedness	<0.001	0.294	333.468	0.995	0.044
Mean Stem Age.climate.breadth	RANGE.bio15	Mean Stem Age ~ Prop. Range Size Sampled+Range Size+Annual Temp. Range+Temp. Seasonality Range+Annual Precip.+Elevational Range+Tarsus Length+Hand Wing Index+Migratory Distance+Landscape Ruggedness	<0.001	0.295	333.936	1.463	0.035
Mean Stem Age.climate.breadth	RANGE.bio1	Mean Stem Age ~ Prop. Range Size Sampled+Range Size+Temp. Seasonality Range+Annual Precip.+Precip. Seasonality+Elevational Range+Tarsus Length+Hand Wing Index+Migratory Distance+Landscape Ruggedness	<0.001	0.292	334.406	1.933	0.028
Mean Stem Age.climate.breadth	Elevation	Mean Stem Age ~ Prop. Range Size Sampled+Range Size+Annual Temp. Range+Temp. Seasonality Range+Annual Precip.+Precip. Seasonality+Tarsus Length+Hand Wing Index+Migratory Distance+Landscape Ruggedness	<0.001	0.29	334.875	2.403	0.022
Mean Stem Age.climate.breadth	RANGE.bio12	Mean Stem Age ~ Prop. Range Size Sampled+Range Size+Annual Temp. Range+Temp. Seasonality Range+Precip. Seasonality+Elevational Range+Tarsus Length+Hand Wing Index+Migratory Distance+Landscape Ruggedness	<0.001	0.238	349.598	17.125	0
Mean Stem Age.climate.breadth	Range Size	Mean Stem Age ~ Prop. Range Size Sampled+Annual Temp. Range+Temp. Seasonality Range+Annual Precip.+Precip. Seasonality+Elevational Range+Tarsus Length+Hand Wing Index+Migratory Distance+Landscape Ruggedness	<0.001	0.214	356.193	23.72	0
Mean Stem Age.climate.stability	Landscape Ruggedness	Mean Stem Age ~ Prop. Range Size Sampled+Range Size+CS Annual Temp.+CS Temp. Seasonality+CS Annual Precip.+CS Precip. Seasonality+Elevation+Tarsus Length+Hand Wing Index+Migratory Distance	<0.001	0.291	335.97	-2.075	0.176
Mean Stem Age.climate.stability	CS_bio_04	Mean Stem Age ~ Prop. Range Size Sampled+Range Size+CS Annual Temp.+CS Annual Precip.+CS Precip. Seasonality+Elevation+Tarsus Length+Hand Wing Index+Migratory Distance+Landscape Ruggedness	<0.001	0.291	336.032	-2.013	0.17
Mean Stem Age.climate.stability	CS_bio_15	Mean Stem Age ~ Prop. Range Size Sampled+Range Size+CS Annual Temp.+CS Temp. Seasonality+CS Annual Precip.+Elevation+Tarsus Length+Hand Wing Index+Migratory Distance+Landscape Ruggedness	<0.001	0.29	336.213	-1.832	0.156
Mean Stem Age.climate.stability	Migratory Distance	Mean Stem Age ~ Prop. Range Size Sampled+Range Size+CS Annual Temp.+CS Temp. Seasonality+CS Annual Precip.+CS Precip. Seasonality+Elevation+Tarsus Length+Hand Wing Index+Landscape Ruggedness	<0.001	0.29	336.255	-1.79	0.152
Mean Stem Age.climate.stability	Tarsus Length	Mean Stem Age ~ Prop. Range Size Sampled+Range Size+CS Annual Temp.+CS Temp. Seasonality+CS Annual Precip.+CS Precip. Seasonality+Elevation+Hand Wing Index+Migratory Distance+Landscape Ruggedness	<0.001	0.286	337.13	-0.915	0.098
Mean Stem Age.climate.stability	Full Model	Mean Stem Age ~ Prop. Range Size Sampled+Range Size+CS Annual Temp.+CS Temp. Seasonality+CS Annual Precip.+CS Precip. Seasonality+Elevation+Tarsus Length+Hand Wing Index+Migratory Distance+Landscape Ruggedness	<0.001	0.288	338.045	0	0.062
Mean Stem Age.climate.stability	Elevation	Mean Stem Age ~ Prop. Range Size Sampled+Range Size+CS Annual Temp.+CS Temp. Seasonality+CS Annual Precip.+CS Precip. Seasonality+Tarsus Length+Hand Wing Index+Migratory Distance+Landscape Ruggedness	<0.001	0.284	338.148	0.102	0.059
Mean Stem Age.climate.stability	CS_bio_12	Mean Stem Age ~ Prop. Range Size Sampled+Range Size+CS Annual Temp.+CS Temp. Seasonality+CS Precip. Seasonality+Elevation+Tarsus Length+Hand Wing Index+Migratory Distance+Landscape Ruggedness	<0.001	0.283	338.472	0.427	0.05
Mean Stem Age.climate.stability	Prop. Range Size Sampled	Mean Stem Age ~ Range Size+CS Annual Temp.+CS Temp. Seasonality+CS Annual Precip.+CS Precip. Seasonality+Elevation+Tarsus Length+Hand Wing Index+Migratory Distance+Landscape Ruggedness	<0.001	0.282	338.548	0.503	0.048
Mean Stem Age.climate.stability	Hand Wing Index	Mean Stem Age ~ Prop. Range Size Sampled+Range Size+CS Annual Temp.+CS Temp. Seasonality+CS Annual Precip.+CS Precip. Seasonality+Elevation+Tarsus Length+Migratory Distance+Landscape Ruggedness	<0.001	0.277	339.696	1.651	0.027
Mean Stem Age.climate.stability	CS_bio_01	Mean Stem Age ~ Prop. Range Size Sampled+Range Size+CS Temp. Seasonality+CS Annual Precip.+CS Precip. Seasonality+Elevation+Tarsus Length+Hand Wing Index+Migratory Distance+Landscape Ruggedness	<0.001	0.235	351.175	13.13	0
Mean Stem Age.climate.stability	Range Size	Mean Stem Age ~ Prop. Range Size Sampled+CS Annual Temp.+CS Temp. Seasonality+CS Annual Precip.+CS Precip. Seasonality+Elevation+Tarsus Length+Hand Wing Index+Migratory Distance+Landscape Ruggedness	<0.001	0.12	380.599	42.554	0
Mean Stem Age.lat	Landscape Ruggedness	Mean Stem Age ~ Prop. Range Size Sampled+Range Size+Latitude Mid.+Elevation+Tarsus Length+Hand Wing Index+Migratory Distance	<0.001	0.301	331.247	-2.185	0.271
Mean Stem Age.lat	Prop. Range Size Sampled	Mean Stem Age ~ Range Size+Latitude Mid.+Elevation+Tarsus Length+Hand Wing Index+Migratory Distance+Landscape Ruggedness	<0.001	0.298	331.989	-1.442	0.187
Mean Stem Age.lat	Tarsus Length	Mean Stem Age ~ Prop. Range Size Sampled+Range Size+Latitude Mid.+Elevation+Hand Wing Index+Migratory Distance+Landscape Ruggedness	<0.001	0.297	332.299	-1.132	0.16
Mean Stem Age.lat	Elevation	Mean Stem Age ~ Prop. Range Size Sampled+Range Size+Latitude Mid.+Tarsus Length+Hand Wing Index+Migratory Distance+Landscape Ruggedness	<0.001	0.298	332.384	-1.047	0.154
Mean Stem Age.lat	Full Model	Mean Stem Age ~ Prop. Range Size Sampled+Range Size+Latitude Mid.+Elevation+Tarsus Length+Hand Wing Index+Migratory Distance+Landscape Ruggedness	<0.001	0.298	333.431	0	0.091
Mean Stem Age.lat	Migratory Distance	Mean Stem Age ~ Prop. Range Size Sampled+Range Size+Latitude Mid.+Elevation+Tarsus Length+Hand Wing Index+Landscape Ruggedness	<0.001	0.294	333.771	0.34	0.077
Mean Stem Age.lat	Hand Wing Index	Mean Stem Age ~ Prop. Range Size Sampled+Range Size+Latitude Mid.+Elevation+Tarsus Length+Migratory Distance+Landscape Ruggedness	<0.001	0.29	334.259	0.828	0.06
Mean Stem Age.lat	Latitude Mid.	Mean Stem Age ~ Prop. Range Size Sampled+Range Size+Elevation+Tarsus Length+Hand Wing Index+Migratory Distance+Landscape Ruggedness	<0.001	0.227	351.15	17.718	0
Mean Stem Age.lat	Range Size	Mean Stem Age ~ Prop. Range Size Sampled+Latitude Mid.+Elevation+Tarsus Length+Hand Wing Index+Migratory Distance+Landscape Ruggedness	<0.001	0.153	372.305	38.874	0
Mean Stem Age.NPP	Landscape Ruggedness	Mean Stem Age ~ Prop. Range Size Sampled+Range Size+NPP+Elevation+Tarsus Length+Hand Wing Index+Migratory Distance	<0.001	0.316	330.209	-2.184	0.314
Mean Stem Age.NPP	Tarsus Length	Mean Stem Age ~ Prop. Range Size Sampled+Range Size+NPP+Elevation+Hand Wing Index+Migratory Distance+Landscape Ruggedness	<0.001	0.311	331.134	-1.258	0.197
Mean Stem Age.NPP	Migratory Distance	Mean Stem Age ~ Prop. Range Size Sampled+Range Size+NPP+Elevation+Tarsus Length+Hand Wing Index+Landscape Ruggedness	<0.001	0.313	331.245	-1.148	0.187
Mean Stem Age.NPP	Full Model	Mean Stem Age ~ Prop. Range Size Sampled+Range Size+NPP+Elevation+Tarsus Length+Hand Wing Index+Migratory Distance+Landscape Ruggedness	<0.001	0.312	332.392	0	0.105
Mean Stem Age.NPP	Elevation	Mean Stem Age ~ Prop. Range Size Sampled+Range Size+NPP+Tarsus Length+Hand Wing Index+Migratory Distance+Landscape Ruggedness	<0.001	0.307	332.846	0.454	0.084
Mean Stem Age.NPP	Prop. Range Size Sampled	Mean Stem Age ~ Range Size+NPP+Elevation+Tarsus Length+Hand Wing Index+Migratory Distance+Landscape Ruggedness	<0.001	0.305	333.075	0.683	0.075
Mean Stem Age.NPP	Hand Wing Index	Mean Stem Age ~ Prop. Range Size Sampled+Range Size+NPP+Elevation+Tarsus Length+Migratory Distance+Landscape Ruggedness	<0.001	0.298	334.411	2.019	0.038
Mean Stem Age.NPP	NPP	Mean Stem Age ~ Prop. Range Size Sampled+Range Size+Elevation+Tarsus Length+Hand Wing Index+Migratory Distance+Landscape Ruggedness	<0.001	0.231	351.868	19.475	0
Mean Stem Age.NPP	Range Size	Mean Stem Age ~ Prop. Range Size Sampled+NPP+Elevation+Tarsus Length+Hand Wing Index+Migratory Distance+Landscape Ruggedness	<0.001	0.191	365.842	33.45	0
Mean Stem Age.pc1	Migratory Distance	Mean Stem Age ~ Prop. Range Size Sampled+Range Size+Bioclim PC1+Elevation+Tarsus Length+Hand Wing Index+Landscape Ruggedness	<0.001	0.306	329.38	-2.158	0.298
Mean Stem Age.pc1	Landscape Ruggedness	Mean Stem Age ~ Prop. Range Size Sampled+Range Size+Bioclim PC1+Elevation+Tarsus Length+Hand Wing Index+Migratory Distance	<0.001	0.305	329.436	-2.102	0.29
Mean Stem Age.pc1	Tarsus Length	Mean Stem Age ~ Prop. Range Size Sampled+Range Size+Bioclim PC1+Elevation+Hand Wing Index+Migratory Distance+Landscape Ruggedness	<0.001	0.3	330.693	-0.845	0.155
Mean Stem Age.pc1	Prop. Range Size Sampled	Mean Stem Age ~ Range Size+Bioclim PC1+Elevation+Tarsus Length+Hand Wing Index+Migratory Distance+Landscape Ruggedness	<0.001	0.298	331.38	-0.158	0.11
Mean Stem Age.pc1	Full Model	Mean Stem Age ~ Prop. Range Size Sampled+Range Size+Bioclim PC1+Elevation+Tarsus Length+Hand Wing Index+Migratory Distance+Landscape Ruggedness	<0.001	0.302	331.538	0	0.101
Mean Stem Age.pc1	Hand Wing Index	Mean Stem Age ~ Prop. Range Size Sampled+Range Size+Bioclim PC1+Elevation+Tarsus Length+Migratory Distance+Landscape Ruggedness	<0.001	0.291	333.342	1.804	0.041
Mean Stem Age.pc1	Elevation	Mean Stem Age ~ Prop. Range Size Sampled+Range Size+Bioclim PC1+Tarsus Length+Hand Wing Index+Migratory Distance+Landscape Ruggedness	<0.001	0.277	337.282	5.744	0.006
Mean Stem Age.pc1	Bioclim PC1	Mean Stem Age ~ Prop. Range Size Sampled+Range Size+Elevation+Tarsus Length+Hand Wing Index+Migratory Distance+Landscape Ruggedness	<0.001	0.226	350.84	19.302	0
Mean Stem Age.pc1	Range Size	Mean Stem Age ~ Prop. Range Size Sampled+Bioclim PC1+Elevation+Tarsus Length+Hand Wing Index+Migratory Distance+Landscape Ruggedness	<0.001	0.122	378.44	46.902	0
stem.rate.climate.breadth	Hand Wing Index	Stem Splitting Rate (0.9) ~ Prop. Range Size Sampled+Range Size+Annual Temp. Range+Temp. Seasonality Range+Annual Precip.+Precip. Seasonality+Elevational Range+Tarsus Length+Migratory Distance+Landscape Ruggedness	0.026	0.05	75.576	-2.168	0.129
stem.rate.climate.breadth	RANGE.bio1	Stem Splitting Rate (0.9) ~ Prop. Range Size Sampled+Range Size+Temp. Seasonality Range+Annual Precip.+Precip. Seasonality+Elevational Range+Tarsus Length+Hand Wing Index+Migratory Distance+Landscape Ruggedness	0.027	0.05	75.632	-2.112	0.126
stem.rate.climate.breadth	Migratory Distance	Stem Splitting Rate (0.9) ~ Prop. Range Size Sampled+Range Size+Annual Temp. Range+Temp. Seasonality Range+Annual Precip.+Precip. Seasonality+Elevational Range+Tarsus Length+Hand Wing Index+Landscape Ruggedness	0.027	0.05	75.637	-2.107	0.125
stem.rate.climate.breadth	Elevation	Stem Splitting Rate (0.9) ~ Prop. Range Size Sampled+Range Size+Annual Temp. Range+Temp. Seasonality Range+Annual Precip.+Precip. Seasonality+Tarsus Length+Hand Wing Index+Migratory Distance+Landscape Ruggedness	0.027	0.05	75.675	-2.069	0.123
stem.rate.climate.breadth	RANGE.bio4	Stem Splitting Rate (0.9) ~ Prop. Range Size Sampled+Range Size+Annual Temp. Range+Annual Precip.+Precip. Seasonality+Elevational Range+Tarsus Length+Hand Wing Index+Migratory Distance+Landscape Ruggedness	0.028	0.049	75.814	-1.93	0.115
stem.rate.climate.breadth	RANGE.bio15	Stem Splitting Rate (0.9) ~ Prop. Range Size Sampled+Range Size+Annual Temp. Range+Temp. Seasonality Range+Annual Precip.+Elevational Range+Tarsus Length+Hand Wing Index+Migratory Distance+Landscape Ruggedness	0.03	0.048	76.005	-1.739	0.104
stem.rate.climate.breadth	Landscape Ruggedness	Stem Splitting Rate (0.9) ~ Prop. Range Size Sampled+Range Size+Annual Temp. Range+Temp. Seasonality Range+Annual Precip.+Precip. Seasonality+Elevational Range+Tarsus Length+Hand Wing Index+Migratory Distance	0.036	0.045	76.619	-1.125	0.077
stem.rate.climate.breadth	RANGE.bio12	Stem Splitting Rate (0.9) ~ Prop. Range Size Sampled+Range Size+Annual Temp. Range+Temp. Seasonality Range+Precip. Seasonality+Elevational Range+Tarsus Length+Hand Wing Index+Migratory Distance+Landscape Ruggedness	0.039	0.044	76.845	-0.899	0.069
stem.rate.climate.breadth	Tarsus Length	Stem Splitting Rate (0.9) ~ Prop. Range Size Sampled+Range Size+Annual Temp. Range+Temp. Seasonality Range+Annual Precip.+Precip. Seasonality+Elevational Range+Hand Wing Index+Migratory Distance+Landscape Ruggedness	0.051	0.04	77.728	-0.016	0.044
stem.rate.climate.breadth	Full Model	Stem Splitting Rate (0.9) ~ Prop. Range Size Sampled+Range Size+Annual Temp. Range+Temp. Seasonality Range+Annual Precip.+Precip. Seasonality+Elevational Range+Tarsus Length+Hand Wing Index+Migratory Distance+Landscape Ruggedness	0.04	0.046	77.744	0	0.044
stem.rate.climate.breadth	Range Size	Stem Splitting Rate (0.9) ~ Prop. Range Size Sampled+Annual Temp. Range+Temp. Seasonality Range+Annual Precip.+Precip. Seasonality+Elevational Range+Tarsus Length+Hand Wing Index+Migratory Distance+Landscape Ruggedness	0.058	0.038	78.159	0.415	0.036
stem.rate.climate.breadth	Prop. Range Size Sampled	Stem Splitting Rate (0.9) ~ Range Size+Annual Temp. Range+Temp. Seasonality Range+Annual Precip.+Precip. Seasonality+Elevational Range+Tarsus Length+Hand Wing Index+Migratory Distance+Landscape Ruggedness	0.125	0.026	80.967	3.223	0.009
stem.rate.climate.stability	Hand Wing Index	Stem Splitting Rate (0.9) ~ Prop. Range Size Sampled+Range Size+CS Annual Temp.+CS Temp. Seasonality+CS Annual Precip.+CS Precip. Seasonality+Elevation+Tarsus Length+Migratory Distance+Landscape Ruggedness	0.011	0.063	73.389	-2.251	0.152
stem.rate.climate.stability	Migratory Distance	Stem Splitting Rate (0.9) ~ Prop. Range Size Sampled+Range Size+CS Annual Temp.+CS Temp. Seasonality+CS Annual Precip.+CS Precip. Seasonality+Elevation+Tarsus Length+Hand Wing Index+Landscape Ruggedness	0.011	0.062	73.58	-2.059	0.138
stem.rate.climate.stability	CS_bio_12	Stem Splitting Rate (0.9) ~ Prop. Range Size Sampled+Range Size+CS Annual Temp.+CS Temp. Seasonality+CS Precip. Seasonality+Elevation+Tarsus Length+Hand Wing Index+Migratory Distance+Landscape Ruggedness	0.012	0.061	73.675	-1.965	0.132
stem.rate.climate.stability	CS_bio_15	Stem Splitting Rate (0.9) ~ Prop. Range Size Sampled+Range Size+CS Annual Temp.+CS Temp. Seasonality+CS Annual Precip.+Elevation+Tarsus Length+Hand Wing Index+Migratory Distance+Landscape Ruggedness	0.013	0.06	73.705	-1.935	0.13
stem.rate.climate.stability	Landscape Ruggedness	Stem Splitting Rate (0.9) ~ Prop. Range Size Sampled+Range Size+CS Annual Temp.+CS Temp. Seasonality+CS Annual Precip.+CS Precip. Seasonality+Elevation+Tarsus Length+Hand Wing Index+Migratory Distance	0.013	0.06	74.203	-1.436	0.101
stem.rate.climate.stability	CS_bio_04	Stem Splitting Rate (0.9) ~ Prop. Range Size Sampled+Range Size+CS Annual Temp.+CS Annual Precip.+CS Precip. Seasonality+Elevation+Tarsus Length+Hand Wing Index+Migratory Distance+Landscape Ruggedness	0.016	0.057	74.368	-1.272	0.093
stem.rate.climate.stability	Tarsus Length	Stem Splitting Rate (0.9) ~ Prop. Range Size Sampled+Range Size+CS Annual Temp.+CS Temp. Seasonality+CS Annual Precip.+CS Precip. Seasonality+Elevation+Hand Wing Index+Migratory Distance+Landscape Ruggedness	0.016	0.057	74.955	-0.684	0.07
stem.rate.climate.stability	CS_bio_01	Stem Splitting Rate (0.9) ~ Prop. Range Size Sampled+Range Size+CS Temp. Seasonality+CS Annual Precip.+CS Precip. Seasonality+Elevation+Tarsus Length+Hand Wing Index+Migratory Distance+Landscape Ruggedness	0.02	0.054	74.961	-0.678	0.069
stem.rate.climate.stability	Elevation	Stem Splitting Rate (0.9) ~ Prop. Range Size Sampled+Range Size+CS Annual Temp.+CS Temp. Seasonality+CS Annual Precip.+CS Precip. Seasonality+Tarsus Length+Hand Wing Index+Migratory Distance+Landscape Ruggedness	0.023	0.052	75.408	-0.231	0.055
stem.rate.climate.stability	Full Model	Stem Splitting Rate (0.9) ~ Prop. Range Size Sampled+Range Size+CS Annual Temp.+CS Temp. Seasonality+CS Annual Precip.+CS Precip. Seasonality+Elevation+Tarsus Length+Hand Wing Index+Migratory Distance+Landscape Ruggedness	0.018	0.058	75.639	0	0.049
stem.rate.climate.stability	Prop. Range Size Sampled	Stem Splitting Rate (0.9) ~ Range Size+CS Annual Temp.+CS Temp. Seasonality+CS Annual Precip.+CS Precip. Seasonality+Elevation+Tarsus Length+Hand Wing Index+Migratory Distance+Landscape Ruggedness	0.087	0.032	79.805	4.165	0.006
stem.rate.climate.stability	Range Size	Stem Splitting Rate (0.9) ~ Prop. Range Size Sampled+CS Annual Temp.+CS Temp. Seasonality+CS Annual Precip.+CS Precip. Seasonality+Elevation+Tarsus Length+Hand Wing Index+Migratory Distance+Landscape Ruggedness	0.04	0.044	80.902	5.263	0.004
stem.rate.lat	Hand Wing Index	Stem Splitting Rate (0.9) ~ Prop. Range Size Sampled+Range Size+Latitude Mid.+Elevation+Tarsus Length+Migratory Distance+Landscape Ruggedness	0.001	0.078	65.987	-2.166	0.238
stem.rate.lat	Migratory Distance	Stem Splitting Rate (0.9) ~ Prop. Range Size Sampled+Range Size+Latitude Mid.+Elevation+Tarsus Length+Hand Wing Index+Landscape Ruggedness	0.001	0.079	65.987	-2.166	0.238
stem.rate.lat	Landscape Ruggedness	Stem Splitting Rate (0.9) ~ Prop. Range Size Sampled+Range Size+Latitude Mid.+Elevation+Tarsus Length+Hand Wing Index+Migratory Distance	0.001	0.079	66.157	-1.996	0.219
stem.rate.lat	Tarsus Length	Stem Splitting Rate (0.9) ~ Prop. Range Size Sampled+Range Size+Latitude Mid.+Elevation+Hand Wing Index+Migratory Distance+Landscape Ruggedness	0.003	0.07	67.951	-0.202	0.089
stem.rate.lat	Elevation	Stem Splitting Rate (0.9) ~ Prop. Range Size Sampled+Range Size+Latitude Mid.+Tarsus Length+Hand Wing Index+Migratory Distance+Landscape Ruggedness	0.003	0.068	67.953	-0.199	0.089
stem.rate.lat	Full Model	Stem Splitting Rate (0.9) ~ Prop. Range Size Sampled+Range Size+Latitude Mid.+Elevation+Tarsus Length+Hand Wing Index+Migratory Distance+Landscape Ruggedness	0.003	0.074	68.153	0	0.081
stem.rate.lat	Latitude Mid.	Stem Splitting Rate (0.9) ~ Prop. Range Size Sampled+Range Size+Elevation+Tarsus Length+Hand Wing Index+Migratory Distance+Landscape Ruggedness	0.01	0.055	70.884	2.731	0.021
stem.rate.lat	Prop. Range Size Sampled	Stem Splitting Rate (0.9) ~ Range Size+Latitude Mid.+Elevation+Tarsus Length+Hand Wing Index+Migratory Distance+Landscape Ruggedness	0.011	0.053	71.378	3.225	0.016
stem.rate.lat	Range Size	Stem Splitting Rate (0.9) ~ Prop. Range Size Sampled+Latitude Mid.+Elevation+Tarsus Length+Hand Wing Index+Migratory Distance+Landscape Ruggedness	0.004	0.065	72.722	4.57	0.008
stem.rate.NPP	Hand Wing Index	Stem Splitting Rate (0.9) ~ Prop. Range Size Sampled+Range Size+NPP+Elevation+Tarsus Length+Migratory Distance+Landscape Ruggedness	0.002	0.071	67.88	-2.17	0.239
stem.rate.NPP	Migratory Distance	Stem Splitting Rate (0.9) ~ Prop. Range Size Sampled+Range Size+NPP+Elevation+Tarsus Length+Hand Wing Index+Landscape Ruggedness	0.002	0.072	67.915	-2.134	0.235
stem.rate.NPP	Landscape Ruggedness	Stem Splitting Rate (0.9) ~ Prop. Range Size Sampled+Range Size+NPP+Elevation+Tarsus Length+Hand Wing Index+Migratory Distance	0.002	0.072	68.131	-1.919	0.211
stem.rate.NPP	Tarsus Length	Stem Splitting Rate (0.9) ~ Prop. Range Size Sampled+Range Size+NPP+Elevation+Hand Wing Index+Migratory Distance+Landscape Ruggedness	0.005	0.064	69.825	-0.224	0.09
stem.rate.NPP	Full Model	Stem Splitting Rate (0.9) ~ Prop. Range Size Sampled+Range Size+NPP+Elevation+Tarsus Length+Hand Wing Index+Migratory Distance+Landscape Ruggedness	0.005	0.067	70.05	0	0.081
stem.rate.NPP	Elevation	Stem Splitting Rate (0.9) ~ Prop. Range Size Sampled+Range Size+NPP+Tarsus Length+Hand Wing Index+Migratory Distance+Landscape Ruggedness	0.008	0.058	70.472	0.422	0.065
stem.rate.NPP	NPP	Stem Splitting Rate (0.9) ~ Prop. Range Size Sampled+Range Size+Elevation+Tarsus Length+Hand Wing Index+Migratory Distance+Landscape Ruggedness	0.01	0.055	71.013	0.963	0.05
stem.rate.NPP	Range Size	Stem Splitting Rate (0.9) ~ Prop. Range Size Sampled+NPP+Elevation+Tarsus Length+Hand Wing Index+Migratory Distance+Landscape Ruggedness	0.004	0.065	72.796	2.747	0.02
stem.rate.NPP	Prop. Range Size Sampled	Stem Splitting Rate (0.9) ~ Range Size+NPP+Elevation+Tarsus Length+Hand Wing Index+Migratory Distance+Landscape Ruggedness	0.038	0.038	74.9	4.85	0.007
stem.rate.pc1	Hand Wing Index	Stem Splitting Rate (0.9) ~ Prop. Range Size Sampled+Range Size+Bioclim PC1+Elevation+Tarsus Length+Migratory Distance+Landscape Ruggedness	0.003	0.069	68.369	-2.182	0.248
stem.rate.pc1	Migratory Distance	Stem Splitting Rate (0.9) ~ Prop. Range Size Sampled+Range Size+Bioclim PC1+Elevation+Tarsus Length+Hand Wing Index+Landscape Ruggedness	0.003	0.068	68.503	-2.047	0.232
stem.rate.pc1	Landscape Ruggedness	Stem Splitting Rate (0.9) ~ Prop. Range Size Sampled+Range Size+Bioclim PC1+Elevation+Tarsus Length+Hand Wing Index+Migratory Distance	0.003	0.068	68.776	-1.775	0.203
stem.rate.pc1	Tarsus Length	Stem Splitting Rate (0.9) ~ Prop. Range Size Sampled+Range Size+Bioclim PC1+Elevation+Hand Wing Index+Migratory Distance+Landscape Ruggedness	0.006	0.062	69.995	-0.555	0.11
stem.rate.pc1	Full Model	Stem Splitting Rate (0.9) ~ Prop. Range Size Sampled+Range Size+Bioclim PC1+Elevation+Tarsus Length+Hand Wing Index+Migratory Distance+Landscape Ruggedness	0.006	0.064	70.55	0	0.083
stem.rate.pc1	Bioclim PC1	Stem Splitting Rate (0.9) ~ Prop. Range Size Sampled+Range Size+Elevation+Tarsus Length+Hand Wing Index+Migratory Distance+Landscape Ruggedness	0.01	0.055	71.128	0.577	0.063
stem.rate.pc1	Elevation	Stem Splitting Rate (0.9) ~ Prop. Range Size Sampled+Range Size+Bioclim PC1+Tarsus Length+Hand Wing Index+Migratory Distance+Landscape Ruggedness	0.013	0.052	71.817	1.267	0.044
stem.rate.pc1	Prop. Range Size Sampled	Stem Splitting Rate (0.9) ~ Range Size+Bioclim PC1+Elevation+Tarsus Length+Hand Wing Index+Migratory Distance+Landscape Ruggedness	0.037	0.038	74.808	4.258	0.01
stem.rate.pc1	Range Size	Stem Splitting Rate (0.9) ~ Prop. Range Size Sampled+Bioclim PC1+Elevation+Tarsus Length+Hand Wing Index+Migratory Distance+Landscape Ruggedness	0.041	0.037	75.773	5.223	0.006

## Sheet: AOU 0.7 - Model Summaries
Model Set	Variable Removed*	Description of Model (see Materials and Methods for which variables were square root converted)	P-value	adj.R2	AICc	delta AICc	AICc weight	*see Variable Key in S2 Table
Mean Crown Age.climate.stability	Tarsus Length	Mean Crown Age ~ Prop. Range Size Sampled+Range Size+CS Annual Temp.+CS Temp. Seasonality+CS Annual Precip.+CS Precip. Seasonality+Elevation+Hand Wing Index+Migratory Distance+Landscape Ruggedness	<0.001	0.344	266.05	-2.185	0.247
Mean Crown Age.climate.stability	Migratory Distance	Mean Crown Age ~ Prop. Range Size Sampled+Range Size+CS Annual Temp.+CS Temp. Seasonality+CS Annual Precip.+CS Precip. Seasonality+Elevation+Tarsus Length+Hand Wing Index+Landscape Ruggedness	<0.001	0.343	266.291	-1.944	0.219
Mean Crown Age.climate.stability	Elevation	Mean Crown Age ~ Prop. Range Size Sampled+Range Size+CS Annual Temp.+CS Temp. Seasonality+CS Annual Precip.+CS Precip. Seasonality+Tarsus Length+Hand Wing Index+Migratory Distance+Landscape Ruggedness	<0.001	0.339	267.726	-0.509	0.107
Mean Crown Age.climate.stability	CS_bio_15	Mean Crown Age ~ Prop. Range Size Sampled+Range Size+CS Annual Temp.+CS Temp. Seasonality+CS Annual Precip.+Elevation+Tarsus Length+Hand Wing Index+Migratory Distance+Landscape Ruggedness	<0.001	0.336	267.896	-0.339	0.098
Mean Crown Age.climate.stability	Full Model	Mean Crown Age ~ Prop. Range Size Sampled+Range Size+CS Annual Temp.+CS Temp. Seasonality+CS Annual Precip.+CS Precip. Seasonality+Elevation+Tarsus Length+Hand Wing Index+Migratory Distance+Landscape Ruggedness	<0.001	0.341	268.235	0	0.083
Mean Crown Age.climate.stability	CS_bio_04	Mean Crown Age ~ Prop. Range Size Sampled+Range Size+CS Annual Temp.+CS Annual Precip.+CS Precip. Seasonality+Elevation+Tarsus Length+Hand Wing Index+Migratory Distance+Landscape Ruggedness	<0.001	0.336	268.308	0.073	0.08
Mean Crown Age.climate.stability	Hand Wing Index	Mean Crown Age ~ Prop. Range Size Sampled+Range Size+CS Annual Temp.+CS Temp. Seasonality+CS Annual Precip.+CS Precip. Seasonality+Elevation+Tarsus Length+Migratory Distance+Landscape Ruggedness	<0.001	0.332	268.714	0.479	0.065
Mean Crown Age.climate.stability	CS_bio_12	Mean Crown Age ~ Prop. Range Size Sampled+Range Size+CS Annual Temp.+CS Temp. Seasonality+CS Precip. Seasonality+Elevation+Tarsus Length+Hand Wing Index+Migratory Distance+Landscape Ruggedness	<0.001	0.338	268.724	0.489	0.065
Mean Crown Age.climate.stability	Landscape Ruggedness	Mean Crown Age ~ Prop. Range Size Sampled+Range Size+CS Annual Temp.+CS Temp. Seasonality+CS Annual Precip.+CS Precip. Seasonality+Elevation+Tarsus Length+Hand Wing Index+Migratory Distance	<0.001	0.327	270.491	2.256	0.027
Mean Crown Age.climate.stability	Prop. Range Size Sampled	Mean Crown Age ~ Range Size+CS Annual Temp.+CS Temp. Seasonality+CS Annual Precip.+CS Precip. Seasonality+Elevation+Tarsus Length+Hand Wing Index+Migratory Distance+Landscape Ruggedness	<0.001	0.323	272.533	4.297	0.01
Mean Crown Age.climate.stability	CS_bio_01	Mean Crown Age ~ Prop. Range Size Sampled+Range Size+CS Temp. Seasonality+CS Annual Precip.+CS Precip. Seasonality+Elevation+Tarsus Length+Hand Wing Index+Migratory Distance+Landscape Ruggedness	<0.001	0.272	282.853	14.618	0
Mean Crown Age.climate.stability	Range Size	Mean Crown Age ~ Prop. Range Size Sampled+CS Annual Temp.+CS Temp. Seasonality+CS Annual Precip.+CS Precip. Seasonality+Elevation+Tarsus Length+Hand Wing Index+Migratory Distance+Landscape Ruggedness	<0.001	0.152	316.748	48.513	0
Mean Crown Age.latitude	Migratory Distance	Mean Crown Age ~ Prop. Range Size Sampled+Range Size+Latitude Mid.+Elevation+Tarsus Length+Hand Wing Index+Landscape Ruggedness	<0.001	0.409	246.789	-2.153	0.24
Mean Crown Age.latitude	Tarsus Length	Mean Crown Age ~ Prop. Range Size Sampled+Range Size+Latitude Mid.+Elevation+Hand Wing Index+Migratory Distance+Landscape Ruggedness	<0.001	0.408	246.989	-1.953	0.217
Mean Crown Age.latitude	Elevation	Mean Crown Age ~ Prop. Range Size Sampled+Range Size+Latitude Mid.+Tarsus Length+Hand Wing Index+Migratory Distance+Landscape Ruggedness	<0.001	0.408	247.139	-1.803	0.202
Mean Crown Age.latitude	Landscape Ruggedness	Mean Crown Age ~ Prop. Range Size Sampled+Range Size+Latitude Mid.+Elevation+Tarsus Length+Hand Wing Index+Migratory Distance	<0.001	0.402	248.414	-0.529	0.107
Mean Crown Age.latitude	Hand Wing Index	Mean Crown Age ~ Prop. Range Size Sampled+Range Size+Latitude Mid.+Elevation+Tarsus Length+Migratory Distance+Landscape Ruggedness	<0.001	0.402	248.766	-0.177	0.089
Mean Crown Age.latitude	Full Model	Mean Crown Age ~ Prop. Range Size Sampled+Range Size+Latitude Mid.+Elevation+Tarsus Length+Hand Wing Index+Migratory Distance+Landscape Ruggedness	<0.001	0.406	248.942	0	0.082
Mean Crown Age.latitude	Prop. Range Size Sampled	Mean Crown Age ~ Range Size+Latitude Mid.+Elevation+Tarsus Length+Hand Wing Index+Migratory Distance+Landscape Ruggedness	<0.001	0.401	249.478	0.536	0.063
Mean Crown Age.latitude	Latitude Mid.	Mean Crown Age ~ Prop. Range Size Sampled+Range Size+Elevation+Tarsus Length+Hand Wing Index+Migratory Distance+Landscape Ruggedness	<0.001	0.255	289.147	40.204	0
Mean Crown Age.latitude	Range Size	Mean Crown Age ~ Prop. Range Size Sampled+Latitude Mid.+Elevation+Tarsus Length+Hand Wing Index+Migratory Distance+Landscape Ruggedness	<0.001	0.206	303.817	54.875	0
Mean Crown Age.climate.breadth	Elevation	Mean Crown Age ~ Prop. Range Size Sampled+Range Size+Annual Temp. Range+Temp. Seasonality Range+Annual Precip.+Precip. Seasonality+Tarsus Length+Hand Wing Index+Migratory Distance+Landscape Ruggedness	<0.001	0.391	254.369	-2.18	0.17
Mean Crown Age.climate.breadth	Migratory Distance	Mean Crown Age ~ Prop. Range Size Sampled+Range Size+Annual Temp. Range+Temp. Seasonality Range+Annual Precip.+Precip. Seasonality+Elevational Range+Tarsus Length+Hand Wing Index+Landscape Ruggedness	<0.001	0.391	254.438	-2.111	0.164
Mean Crown Age.climate.breadth	RANGE.bio4	Mean Crown Age ~ Prop. Range Size Sampled+Range Size+Annual Temp. Range+Annual Precip.+Precip. Seasonality+Elevational Range+Tarsus Length+Hand Wing Index+Migratory Distance+Landscape Ruggedness	<0.001	0.39	254.671	-1.879	0.146
Mean Crown Age.climate.breadth	RANGE.bio1	Mean Crown Age ~ Prop. Range Size Sampled+Range Size+Temp. Seasonality Range+Annual Precip.+Precip. Seasonality+Elevational Range+Tarsus Length+Hand Wing Index+Migratory Distance+Landscape Ruggedness	<0.001	0.392	254.708	-1.841	0.143
Mean Crown Age.climate.breadth	Tarsus Length	Mean Crown Age ~ Prop. Range Size Sampled+Range Size+Annual Temp. Range+Temp. Seasonality Range+Annual Precip.+Precip. Seasonality+Elevational Range+Hand Wing Index+Migratory Distance+Landscape Ruggedness	<0.001	0.391	254.899	-1.65	0.13
Mean Crown Age.climate.breadth	RANGE.bio15	Mean Crown Age ~ Prop. Range Size Sampled+Range Size+Annual Temp. Range+Temp. Seasonality Range+Annual Precip.+Elevational Range+Tarsus Length+Hand Wing Index+Migratory Distance+Landscape Ruggedness	<0.001	0.392	254.982	-1.568	0.125
Mean Crown Age.climate.breadth	Full Model	Mean Crown Age ~ Prop. Range Size Sampled+Range Size+Annual Temp. Range+Temp. Seasonality Range+Annual Precip.+Precip. Seasonality+Elevational Range+Tarsus Length+Hand Wing Index+Migratory Distance+Landscape Ruggedness	<0.001	0.389	256.55	0	0.057
Mean Crown Age.climate.breadth	Landscape Ruggedness	Mean Crown Age ~ Prop. Range Size Sampled+Range Size+Annual Temp. Range+Temp. Seasonality Range+Annual Precip.+Precip. Seasonality+Elevational Range+Tarsus Length+Hand Wing Index+Migratory Distance	<0.001	0.381	257.671	1.121	0.033
Mean Crown Age.climate.breadth	Hand Wing Index	Mean Crown Age ~ Prop. Range Size Sampled+Range Size+Annual Temp. Range+Temp. Seasonality Range+Annual Precip.+Precip. Seasonality+Elevational Range+Tarsus Length+Migratory Distance+Landscape Ruggedness	<0.001	0.373	258.8	2.25	0.019
Mean Crown Age.climate.breadth	Prop. Range Size Sampled	Mean Crown Age ~ Range Size+Annual Temp. Range+Temp. Seasonality Range+Annual Precip.+Precip. Seasonality+Elevational Range+Tarsus Length+Hand Wing Index+Migratory Distance+Landscape Ruggedness	<0.001	0.377	259.337	2.788	0.014
Mean Crown Age.climate.breadth	Range Size	Mean Crown Age ~ Prop. Range Size Sampled+Annual Temp. Range+Temp. Seasonality Range+Annual Precip.+Precip. Seasonality+Elevational Range+Tarsus Length+Hand Wing Index+Migratory Distance+Landscape Ruggedness	<0.001	0.273	287.756	31.206	0
Mean Crown Age.climate.breadth	RANGE.bio12	Mean Crown Age ~ Prop. Range Size Sampled+Range Size+Annual Temp. Range+Temp. Seasonality Range+Precip. Seasonality+Elevational Range+Tarsus Length+Hand Wing Index+Migratory Distance+Landscape Ruggedness	<0.001	0.268	289.248	32.699	0
Mean Crown Age.NPP	Migratory Distance	Mean Crown Age ~ Prop. Range Size Sampled+Range Size+NPP+Elevation+Tarsus Length+Hand Wing Index+Landscape Ruggedness	<0.001	0.379	255.284	-2.058	0.301
Mean Crown Age.NPP	Tarsus Length	Mean Crown Age ~ Prop. Range Size Sampled+Range Size+NPP+Elevation+Hand Wing Index+Migratory Distance+Landscape Ruggedness	<0.001	0.379	255.341	-2	0.293
Mean Crown Age.NPP	Landscape Ruggedness	Mean Crown Age ~ Prop. Range Size Sampled+Range Size+NPP+Elevation+Tarsus Length+Hand Wing Index+Migratory Distance	<0.001	0.372	257.184	-0.158	0.117
Mean Crown Age.NPP	Elevation	Mean Crown Age ~ Prop. Range Size Sampled+Range Size+NPP+Tarsus Length+Hand Wing Index+Migratory Distance+Landscape Ruggedness	<0.001	0.373	257.194	-0.148	0.116
Mean Crown Age.NPP	Full Model	Mean Crown Age ~ Prop. Range Size Sampled+Range Size+NPP+Elevation+Tarsus Length+Hand Wing Index+Migratory Distance+Landscape Ruggedness	<0.001	0.376	257.341	0	0.108
Mean Crown Age.NPP	Hand Wing Index	Mean Crown Age ~ Prop. Range Size Sampled+Range Size+NPP+Elevation+Tarsus Length+Migratory Distance+Landscape Ruggedness	<0.001	0.364	258.676	1.334	0.055
Mean Crown Age.NPP	Prop. Range Size Sampled	Mean Crown Age ~ Range Size+NPP+Elevation+Tarsus Length+Hand Wing Index+Migratory Distance+Landscape Ruggedness	<0.001	0.358	262.131	4.789	0.01
Mean Crown Age.NPP	NPP	Mean Crown Age ~ Prop. Range Size Sampled+Range Size+Elevation+Tarsus Length+Hand Wing Index+Migratory Distance+Landscape Ruggedness	<0.001	0.255	289.147	31.805	0
Mean Crown Age.NPP	Range Size	Mean Crown Age ~ Prop. Range Size Sampled+NPP+Elevation+Tarsus Length+Hand Wing Index+Migratory Distance+Landscape Ruggedness	<0.001	0.218	299.925	42.583	0
Mean Crown Age.pc1	Tarsus Length	Mean Crown Age ~ Prop. Range Size Sampled+Range Size+Bioclim PC1+Elevation+Hand Wing Index+Migratory Distance+Landscape Ruggedness	<0.001	0.39	251.261	-2.101	0.437
Mean Crown Age.pc1	Migratory Distance	Mean Crown Age ~ Prop. Range Size Sampled+Range Size+Bioclim PC1+Elevation+Tarsus Length+Hand Wing Index+Landscape Ruggedness	<0.001	0.384	252.882	-0.48	0.194
Mean Crown Age.pc1	Full Model	Mean Crown Age ~ Prop. Range Size Sampled+Range Size+Bioclim PC1+Elevation+Tarsus Length+Hand Wing Index+Migratory Distance+Landscape Ruggedness	<0.001	0.387	253.362	0	0.153
Mean Crown Age.pc1	Hand Wing Index	Mean Crown Age ~ Prop. Range Size Sampled+Range Size+Bioclim PC1+Elevation+Tarsus Length+Migratory Distance+Landscape Ruggedness	<0.001	0.378	254.324	0.962	0.094
Mean Crown Age.pc1	Landscape Ruggedness	Mean Crown Age ~ Prop. Range Size Sampled+Range Size+Bioclim PC1+Elevation+Tarsus Length+Hand Wing Index+Migratory Distance	<0.001	0.379	254.499	1.136	0.086
Mean Crown Age.pc1	Prop. Range Size Sampled	Mean Crown Age ~ Range Size+Bioclim PC1+Elevation+Tarsus Length+Hand Wing Index+Migratory Distance+Landscape Ruggedness	<0.001	0.374	256.569	3.207	0.031
Mean Crown Age.pc1	Elevation	Mean Crown Age ~ Prop. Range Size Sampled+Range Size+Bioclim PC1+Tarsus Length+Hand Wing Index+Migratory Distance+Landscape Ruggedness	<0.001	0.36	260.162	6.799	0.005
Mean Crown Age.pc1	Bioclim PC1	Mean Crown Age ~ Prop. Range Size Sampled+Range Size+Elevation+Tarsus Length+Hand Wing Index+Migratory Distance+Landscape Ruggedness	<0.001	0.256	288.583	35.22	0
Mean Crown Age.pc1	Range Size	Mean Crown Age ~ Prop. Range Size Sampled+Bioclim PC1+Elevation+Tarsus Length+Hand Wing Index+Migratory Distance+Landscape Ruggedness	<0.001	0.15	315.71	62.348	0
crown.rate.climate.breadth	RANGE.bio15	Crown Splitting Rate (0.9) ~ Prop. Range Size Sampled+Range Size+Annual Temp. Range+Temp. Seasonality Range+Annual Precip.+Elevational Range+Tarsus Length+Hand Wing Index+Migratory Distance+Landscape Ruggedness	0.122	0.026	252.551	-2.235	0.137
crown.rate.climate.breadth	Hand Wing Index	Crown Splitting Rate (0.9) ~ Prop. Range Size Sampled+Range Size+Annual Temp. Range+Temp. Seasonality Range+Annual Precip.+Precip. Seasonality+Elevational Range+Tarsus Length+Migratory Distance+Landscape Ruggedness	0.124	0.026	252.58	-2.206	0.135
crown.rate.climate.breadth	RANGE.bio4	Crown Splitting Rate (0.9) ~ Prop. Range Size Sampled+Range Size+Annual Temp. Range+Annual Precip.+Precip. Seasonality+Elevational Range+Tarsus Length+Hand Wing Index+Migratory Distance+Landscape Ruggedness	0.126	0.025	252.642	-2.144	0.131
crown.rate.climate.breadth	Migratory Distance	Crown Splitting Rate (0.9) ~ Prop. Range Size Sampled+Range Size+Annual Temp. Range+Temp. Seasonality Range+Annual Precip.+Precip. Seasonality+Elevational Range+Tarsus Length+Hand Wing Index+Landscape Ruggedness	0.135	0.024	252.904	-1.882	0.115
crown.rate.climate.breadth	Landscape Ruggedness	Crown Splitting Rate (0.9) ~ Prop. Range Size Sampled+Range Size+Annual Temp. Range+Temp. Seasonality Range+Annual Precip.+Precip. Seasonality+Elevational Range+Tarsus Length+Hand Wing Index+Migratory Distance	0.135	0.024	252.936	-1.85	0.113
crown.rate.climate.breadth	Range Size	Crown Splitting Rate (0.9) ~ Prop. Range Size Sampled+Annual Temp. Range+Temp. Seasonality Range+Annual Precip.+Precip. Seasonality+Elevational Range+Tarsus Length+Hand Wing Index+Migratory Distance+Landscape Ruggedness	0.148	0.023	253.253	-1.533	0.096
crown.rate.climate.breadth	RANGE.bio12	Crown Splitting Rate (0.9) ~ Prop. Range Size Sampled+Range Size+Annual Temp. Range+Temp. Seasonality Range+Precip. Seasonality+Elevational Range+Tarsus Length+Hand Wing Index+Migratory Distance+Landscape Ruggedness	0.157	0.022	253.491	-1.295	0.086
crown.rate.climate.breadth	Elevation	Crown Splitting Rate (0.9) ~ Prop. Range Size Sampled+Range Size+Annual Temp. Range+Temp. Seasonality Range+Annual Precip.+Precip. Seasonality+Tarsus Length+Hand Wing Index+Migratory Distance+Landscape Ruggedness	0.171	0.02	253.798	-0.988	0.073
crown.rate.climate.breadth	Full Model	Crown Splitting Rate (0.9) ~ Prop. Range Size Sampled+Range Size+Annual Temp. Range+Temp. Seasonality Range+Annual Precip.+Precip. Seasonality+Elevational Range+Tarsus Length+Hand Wing Index+Migratory Distance+Landscape Ruggedness	0.171	0.021	254.786	0	0.045
crown.rate.climate.breadth	RANGE.bio1	Crown Splitting Rate (0.9) ~ Prop. Range Size Sampled+Range Size+Temp. Seasonality Range+Annual Precip.+Precip. Seasonality+Elevational Range+Tarsus Length+Hand Wing Index+Migratory Distance+Landscape Ruggedness	0.234	0.014	255.068	0.282	0.039
crown.rate.climate.breadth	Tarsus Length	Crown Splitting Rate (0.9) ~ Prop. Range Size Sampled+Range Size+Annual Temp. Range+Temp. Seasonality Range+Annual Precip.+Precip. Seasonality+Elevational Range+Hand Wing Index+Migratory Distance+Landscape Ruggedness	0.274	0.011	255.812	1.026	0.027
crown.rate.climate.breadth	Prop. Range Size Sampled	Crown Splitting Rate (0.9) ~ Range Size+Annual Temp. Range+Temp. Seasonality Range+Annual Precip.+Precip. Seasonality+Elevational Range+Tarsus Length+Hand Wing Index+Migratory Distance+Landscape Ruggedness	0.608	-0.009	260.065	5.279	0.003
crown.rate.climate.stability	Landscape Ruggedness	Crown Splitting Rate (0.9) ~ Prop. Range Size Sampled+Range Size+CS Annual Temp.+CS Temp. Seasonality+CS Annual Precip.+CS Precip. Seasonality+Elevation+Tarsus Length+Hand Wing Index+Migratory Distance	0.092	0.031	252.055	-2.241	0.135
crown.rate.climate.stability	Hand Wing Index	Crown Splitting Rate (0.9) ~ Prop. Range Size Sampled+Range Size+CS Annual Temp.+CS Temp. Seasonality+CS Annual Precip.+CS Precip. Seasonality+Elevation+Tarsus Length+Migratory Distance+Landscape Ruggedness	0.09	0.031	252.061	-2.235	0.135
crown.rate.climate.stability	CS_bio_15	Crown Splitting Rate (0.9) ~ Prop. Range Size Sampled+Range Size+CS Annual Temp.+CS Temp. Seasonality+CS Annual Precip.+Elevation+Tarsus Length+Hand Wing Index+Migratory Distance+Landscape Ruggedness	0.095	0.03	252.076	-2.22	0.134
crown.rate.climate.stability	CS_bio_12	Crown Splitting Rate (0.9) ~ Prop. Range Size Sampled+Range Size+CS Annual Temp.+CS Temp. Seasonality+CS Precip. Seasonality+Elevation+Tarsus Length+Hand Wing Index+Migratory Distance+Landscape Ruggedness	0.096	0.03	252.125	-2.171	0.13
crown.rate.climate.stability	Migratory Distance	Crown Splitting Rate (0.9) ~ Prop. Range Size Sampled+Range Size+CS Annual Temp.+CS Temp. Seasonality+CS Annual Precip.+CS Precip. Seasonality+Elevation+Tarsus Length+Hand Wing Index+Landscape Ruggedness	0.073	0.035	252.514	-1.783	0.107
crown.rate.climate.stability	CS_bio_04	Crown Splitting Rate (0.9) ~ Prop. Range Size Sampled+Range Size+CS Annual Temp.+CS Annual Precip.+CS Precip. Seasonality+Elevation+Tarsus Length+Hand Wing Index+Migratory Distance+Landscape Ruggedness	0.11	0.028	252.559	-1.737	0.105
crown.rate.climate.stability	CS_bio_01	Crown Splitting Rate (0.9) ~ Prop. Range Size Sampled+Range Size+CS Temp. Seasonality+CS Annual Precip.+CS Precip. Seasonality+Elevation+Tarsus Length+Hand Wing Index+Migratory Distance+Landscape Ruggedness	0.14	0.024	253.321	-0.975	0.072
crown.rate.climate.stability	Elevation	Crown Splitting Rate (0.9) ~ Prop. Range Size Sampled+Range Size+CS Annual Temp.+CS Temp. Seasonality+CS Annual Precip.+CS Precip. Seasonality+Tarsus Length+Hand Wing Index+Migratory Distance+Landscape Ruggedness	0.16	0.021	253.832	-0.465	0.056
crown.rate.climate.stability	Tarsus Length	Crown Splitting Rate (0.9) ~ Prop. Range Size Sampled+Range Size+CS Annual Temp.+CS Temp. Seasonality+CS Annual Precip.+CS Precip. Seasonality+Elevation+Hand Wing Index+Migratory Distance+Landscape Ruggedness	0.112	0.028	254.03	-0.267	0.05
crown.rate.climate.stability	Full Model	Crown Splitting Rate (0.9) ~ Prop. Range Size Sampled+Range Size+CS Annual Temp.+CS Temp. Seasonality+CS Annual Precip.+CS Precip. Seasonality+Elevation+Tarsus Length+Hand Wing Index+Migratory Distance+Landscape Ruggedness	0.133	0.026	254.296	0	0.044
crown.rate.climate.stability	Range Size	Crown Splitting Rate (0.9) ~ Prop. Range Size Sampled+CS Annual Temp.+CS Temp. Seasonality+CS Annual Precip.+CS Precip. Seasonality+Elevation+Tarsus Length+Hand Wing Index+Migratory Distance+Landscape Ruggedness	0.148	0.023	255.092	0.796	0.03
crown.rate.climate.stability	Prop. Range Size Sampled	Crown Splitting Rate (0.9) ~ Range Size+CS Annual Temp.+CS Temp. Seasonality+CS Annual Precip.+CS Precip. Seasonality+Elevation+Tarsus Length+Hand Wing Index+Migratory Distance+Landscape Ruggedness	0.558	-0.006	259.483	5.187	0.003
crown.rate.lat	Migratory Distance	Crown Splitting Rate (0.9) ~ Prop. Range Size Sampled+Range Size+Latitude Mid.+Elevation+Tarsus Length+Hand Wing Index+Landscape Ruggedness	0.04	0.037	246.958	-2.15	0.2
crown.rate.lat	Hand Wing Index	Crown Splitting Rate (0.9) ~ Prop. Range Size Sampled+Range Size+Latitude Mid.+Elevation+Tarsus Length+Migratory Distance+Landscape Ruggedness	0.04	0.037	246.958	-2.149	0.2
crown.rate.lat	Landscape Ruggedness	Crown Splitting Rate (0.9) ~ Prop. Range Size Sampled+Range Size+Latitude Mid.+Elevation+Tarsus Length+Hand Wing Index+Migratory Distance	0.043	0.036	247.037	-2.071	0.192
crown.rate.lat	Latitude Mid.	Crown Splitting Rate (0.9) ~ Prop. Range Size Sampled+Range Size+Elevation+Tarsus Length+Hand Wing Index+Migratory Distance+Landscape Ruggedness	0.066	0.03	248.188	-0.919	0.108
crown.rate.lat	Tarsus Length	Crown Splitting Rate (0.9) ~ Prop. Range Size Sampled+Range Size+Latitude Mid.+Elevation+Hand Wing Index+Migratory Distance+Landscape Ruggedness	0.076	0.028	248.804	-0.304	0.079
crown.rate.lat	Elevation	Crown Splitting Rate (0.9) ~ Prop. Range Size Sampled+Range Size+Latitude Mid.+Tarsus Length+Hand Wing Index+Migratory Distance+Landscape Ruggedness	0.081	0.028	248.842	-0.266	0.078
crown.rate.lat	Full Model	Crown Splitting Rate (0.9) ~ Prop. Range Size Sampled+Range Size+Latitude Mid.+Elevation+Tarsus Length+Hand Wing Index+Migratory Distance+Landscape Ruggedness	0.067	0.032	249.108	0	0.068
crown.rate.lat	Range Size	Crown Splitting Rate (0.9) ~ Prop. Range Size Sampled+Latitude Mid.+Elevation+Tarsus Length+Hand Wing Index+Migratory Distance+Landscape Ruggedness	0.079	0.028	249.144	0.036	0.067
crown.rate.lat	Prop. Range Size Sampled	Crown Splitting Rate (0.9) ~ Range Size+Latitude Mid.+Elevation+Tarsus Length+Hand Wing Index+Migratory Distance+Landscape Ruggedness	0.338	0.005	253.693	4.585	0.007
crown.rate.NPP	Hand Wing Index	Crown Splitting Rate (0.9) ~ Prop. Range Size Sampled+Range Size+NPP+Elevation+Tarsus Length+Migratory Distance+Landscape Ruggedness	0.019	0.047	246.296	-2.159	0.206
crown.rate.NPP	Migratory Distance	Crown Splitting Rate (0.9) ~ Prop. Range Size Sampled+Range Size+NPP+Elevation+Tarsus Length+Hand Wing Index+Landscape Ruggedness	0.02	0.047	246.415	-2.04	0.194
crown.rate.NPP	Landscape Ruggedness	Crown Splitting Rate (0.9) ~ Prop. Range Size Sampled+Range Size+NPP+Elevation+Tarsus Length+Hand Wing Index+Migratory Distance	0.02	0.046	246.47	-1.986	0.189
crown.rate.NPP	Range Size	Crown Splitting Rate (0.9) ~ Prop. Range Size Sampled+NPP+Elevation+Tarsus Length+Hand Wing Index+Migratory Distance+Landscape Ruggedness	0.03	0.041	247.602	-0.853	0.107
crown.rate.NPP	NPP	Crown Splitting Rate (0.9) ~ Prop. Range Size Sampled+Range Size+Elevation+Tarsus Length+Hand Wing Index+Migratory Distance+Landscape Ruggedness	0.068	0.03	247.956	-0.5	0.09
crown.rate.NPP	Elevation	Crown Splitting Rate (0.9) ~ Prop. Range Size Sampled+Range Size+NPP+Tarsus Length+Hand Wing Index+Migratory Distance+Landscape Ruggedness	0.076	0.029	248.393	-0.062	0.072
crown.rate.NPP	Full Model	Crown Splitting Rate (0.9) ~ Prop. Range Size Sampled+Range Size+NPP+Elevation+Tarsus Length+Hand Wing Index+Migratory Distance+Landscape Ruggedness	0.032	0.043	248.455	0	0.07
crown.rate.NPP	Tarsus Length	Crown Splitting Rate (0.9) ~ Prop. Range Size Sampled+Range Size+NPP+Elevation+Hand Wing Index+Migratory Distance+Landscape Ruggedness	0.041	0.037	248.512	0.057	0.068
crown.rate.NPP	Prop. Range Size Sampled	Crown Splitting Rate (0.9) ~ Range Size+NPP+Elevation+Tarsus Length+Hand Wing Index+Migratory Distance+Landscape Ruggedness	0.399	0.002	254.027	5.572	0.004
crown.rate.pc1	Hand Wing Index	Crown Splitting Rate (0.9) ~ Prop. Range Size Sampled+Range Size+Bioclim PC1+Elevation+Tarsus Length+Migratory Distance+Landscape Ruggedness	0.048	0.035	247.531	-2.153	0.198
crown.rate.pc1	Landscape Ruggedness	Crown Splitting Rate (0.9) ~ Prop. Range Size Sampled+Range Size+Bioclim PC1+Elevation+Tarsus Length+Hand Wing Index+Migratory Distance	0.05	0.034	247.552	-2.132	0.196
crown.rate.pc1	Migratory Distance	Crown Splitting Rate (0.9) ~ Prop. Range Size Sampled+Range Size+Bioclim PC1+Elevation+Tarsus Length+Hand Wing Index+Landscape Ruggedness	0.05	0.034	247.577	-2.107	0.194
crown.rate.pc1	Bioclim PC1	Crown Splitting Rate (0.9) ~ Prop. Range Size Sampled+Range Size+Elevation+Tarsus Length+Hand Wing Index+Migratory Distance+Landscape Ruggedness	0.065	0.031	248.23	-1.454	0.14
crown.rate.pc1	Tarsus Length	Crown Splitting Rate (0.9) ~ Prop. Range Size Sampled+Range Size+Bioclim PC1+Elevation+Hand Wing Index+Migratory Distance+Landscape Ruggedness	0.087	0.027	249.246	-0.438	0.084
crown.rate.pc1	Full Model	Crown Splitting Rate (0.9) ~ Prop. Range Size Sampled+Range Size+Bioclim PC1+Elevation+Tarsus Length+Hand Wing Index+Migratory Distance+Landscape Ruggedness	0.079	0.03	249.684	0	0.067
crown.rate.pc1	Elevation	Crown Splitting Rate (0.9) ~ Prop. Range Size Sampled+Range Size+Bioclim PC1+Tarsus Length+Hand Wing Index+Migratory Distance+Landscape Ruggedness	0.114	0.023	249.973	0.289	0.058
crown.rate.pc1	Range Size	Crown Splitting Rate (0.9) ~ Prop. Range Size Sampled+Bioclim PC1+Elevation+Tarsus Length+Hand Wing Index+Migratory Distance+Landscape Ruggedness	0.107	0.024	249.991	0.308	0.058
crown.rate.pc1	Prop. Range Size Sampled	Crown Splitting Rate (0.9) ~ Range Size+Bioclim PC1+Elevation+Tarsus Length+Hand Wing Index+Migratory Distance+Landscape Ruggedness	0.448	-0.001	254.884	5.201	0.005
phylog.struct.crown.climate.breadth	Hand Wing Index	Phylogeographic Structure (0.9) ~ Mean Crown Age+Prop. Range Size Sampled+Range Size+Annual Temp. Range+Temp. Seasonality Range+Annual Precip.+Precip. Seasonality+Elevational Range+Tarsus Length+Migratory Distance+Landscape Ruggedness	<0.001	0.353	334.849	-2.115	0.114
phylog.struct.crown.climate.breadth	Elevation	Phylogeographic Structure (0.9) ~ Mean Crown Age+Prop. Range Size Sampled+Range Size+Annual Temp. Range+Temp. Seasonality Range+Annual Precip.+Precip. Seasonality+Tarsus Length+Hand Wing Index+Migratory Distance+Landscape Ruggedness	<0.001	0.353	334.876	-2.088	0.113
phylog.struct.crown.climate.breadth	RANGE.bio15	Phylogeographic Structure (0.9) ~ Mean Crown Age+Prop. Range Size Sampled+Range Size+Annual Temp. Range+Temp. Seasonality Range+Annual Precip.+Elevational Range+Tarsus Length+Hand Wing Index+Migratory Distance+Landscape Ruggedness	<0.001	0.352	334.92	-2.044	0.11
phylog.struct.crown.climate.breadth	Range Size	Phylogeographic Structure (0.9) ~ Mean Crown Age+Prop. Range Size Sampled+Annual Temp. Range+Temp. Seasonality Range+Annual Precip.+Precip. Seasonality+Elevational Range+Tarsus Length+Hand Wing Index+Migratory Distance+Landscape Ruggedness	<0.001	0.352	334.975	-1.989	0.107
phylog.struct.crown.climate.breadth	RANGE.bio4	Phylogeographic Structure (0.9) ~ Mean Crown Age+Prop. Range Size Sampled+Range Size+Annual Temp. Range+Annual Precip.+Precip. Seasonality+Elevational Range+Tarsus Length+Hand Wing Index+Migratory Distance+Landscape Ruggedness	<0.001	0.352	335.1	-1.864	0.101
phylog.struct.crown.climate.breadth	Landscape Ruggedness	Phylogeographic Structure (0.9) ~ Mean Crown Age+Prop. Range Size Sampled+Range Size+Annual Temp. Range+Temp. Seasonality Range+Annual Precip.+Precip. Seasonality+Elevational Range+Tarsus Length+Hand Wing Index+Migratory Distance	<0.001	0.352	335.185	-1.779	0.097
phylog.struct.crown.climate.breadth	RANGE.bio12	Phylogeographic Structure (0.9) ~ Mean Crown Age+Prop. Range Size Sampled+Range Size+Annual Temp. Range+Temp. Seasonality Range+Precip. Seasonality+Elevational Range+Tarsus Length+Hand Wing Index+Migratory Distance+Landscape Ruggedness	<0.001	0.351	335.247	-1.717	0.094
phylog.struct.crown.climate.breadth	RANGE.bio1	Phylogeographic Structure (0.9) ~ Mean Crown Age+Prop. Range Size Sampled+Range Size+Temp. Seasonality Range+Annual Precip.+Precip. Seasonality+Elevational Range+Tarsus Length+Hand Wing Index+Migratory Distance+Landscape Ruggedness	<0.001	0.351	335.464	-1.5	0.084
phylog.struct.crown.climate.breadth	Migratory Distance	Phylogeographic Structure (0.9) ~ Mean Crown Age+Prop. Range Size Sampled+Range Size+Annual Temp. Range+Temp. Seasonality Range+Annual Precip.+Precip. Seasonality+Elevational Range+Tarsus Length+Hand Wing Index+Landscape Ruggedness	<0.001	0.35	335.602	-1.362	0.078
phylog.struct.crown.climate.breadth	Tarsus Length	Phylogeographic Structure (0.9) ~ Mean Crown Age+Prop. Range Size Sampled+Range Size+Annual Temp. Range+Temp. Seasonality Range+Annual Precip.+Precip. Seasonality+Elevational Range+Hand Wing Index+Migratory Distance+Landscape Ruggedness	<0.001	0.349	336.08	-0.884	0.062
phylog.struct.crown.climate.breadth	Full Model	Phylogeographic Structure (0.9) ~ Mean Crown Age+Prop. Range Size Sampled+Range Size+Annual Temp. Range+Temp. Seasonality Range+Annual Precip.+Precip. Seasonality+Elevational Range+Tarsus Length+Hand Wing Index+Migratory Distance+Landscape Ruggedness	<0.001	0.35	336.964	0	0.04
phylog.struct.crown.climate.breadth	Prop. Range Size Sampled	Phylogeographic Structure (0.9) ~ Mean Crown Age+Range Size+Annual Temp. Range+Temp. Seasonality Range+Annual Precip.+Precip. Seasonality+Elevational Range+Tarsus Length+Hand Wing Index+Migratory Distance+Landscape Ruggedness	<0.001	0.323	344.087	7.123	0.001
phylog.struct.crown.climate.breadth	Age	Phylogeographic Structure (0.9) ~ Prop. Range Size Sampled+Range Size+Annual Temp. Range+Temp. Seasonality Range+Annual Precip.+Precip. Seasonality+Elevational Range+Tarsus Length+Hand Wing Index+Migratory Distance+Landscape Ruggedness	<0.001	0.174	385.778	48.814	0
phylog.struct.crown.climate.stability	CS_bio_01	Phylogeographic Structure (0.9) ~ Mean Crown Age+Prop. Range Size Sampled+Range Size+CS Temp. Seasonality+CS Annual Precip.+CS Precip. Seasonality+Elevation+Tarsus Length+Hand Wing Index+Migratory Distance+Landscape Ruggedness	<0.001	0.362	331.813	-2.274	0.135
phylog.struct.crown.climate.stability	Hand Wing Index	Phylogeographic Structure (0.9) ~ Mean Crown Age+Prop. Range Size Sampled+Range Size+CS Annual Temp.+CS Temp. Seasonality+CS Annual Precip.+CS Precip. Seasonality+Elevation+Tarsus Length+Migratory Distance+Landscape Ruggedness	<0.001	0.362	331.824	-2.263	0.134
phylog.struct.crown.climate.stability	CS_bio_15	Phylogeographic Structure (0.9) ~ Mean Crown Age+Prop. Range Size Sampled+Range Size+CS Annual Temp.+CS Temp. Seasonality+CS Annual Precip.+Elevation+Tarsus Length+Hand Wing Index+Migratory Distance+Landscape Ruggedness	<0.001	0.362	331.889	-2.198	0.13
phylog.struct.crown.climate.stability	Landscape Ruggedness	Phylogeographic Structure (0.9) ~ Mean Crown Age+Prop. Range Size Sampled+Range Size+CS Annual Temp.+CS Temp. Seasonality+CS Annual Precip.+CS Precip. Seasonality+Elevation+Tarsus Length+Hand Wing Index+Migratory Distance	<0.001	0.361	331.991	-2.096	0.123
phylog.struct.crown.climate.stability	CS_bio_12	Phylogeographic Structure (0.9) ~ Mean Crown Age+Prop. Range Size Sampled+Range Size+CS Annual Temp.+CS Temp. Seasonality+CS Precip. Seasonality+Elevation+Tarsus Length+Hand Wing Index+Migratory Distance+Landscape Ruggedness	<0.001	0.36	332.358	-1.729	0.103
phylog.struct.crown.climate.stability	Migratory Distance	Phylogeographic Structure (0.9) ~ Mean Crown Age+Prop. Range Size Sampled+Range Size+CS Annual Temp.+CS Temp. Seasonality+CS Annual Precip.+CS Precip. Seasonality+Elevation+Tarsus Length+Hand Wing Index+Landscape Ruggedness	<0.001	0.36	332.538	-1.549	0.094
phylog.struct.crown.climate.stability	Range Size	Phylogeographic Structure (0.9) ~ Mean Crown Age+Prop. Range Size Sampled+CS Annual Temp.+CS Temp. Seasonality+CS Annual Precip.+CS Precip. Seasonality+Elevation+Tarsus Length+Hand Wing Index+Migratory Distance+Landscape Ruggedness	<0.001	0.36	332.598	-1.489	0.091
phylog.struct.crown.climate.stability	Tarsus Length	Phylogeographic Structure (0.9) ~ Mean Crown Age+Prop. Range Size Sampled+Range Size+CS Annual Temp.+CS Temp. Seasonality+CS Annual Precip.+CS Precip. Seasonality+Elevation+Hand Wing Index+Migratory Distance+Landscape Ruggedness	<0.001	0.36	332.615	-1.472	0.09
phylog.struct.crown.climate.stability	Full Model	Phylogeographic Structure (0.9) ~ Mean Crown Age+Prop. Range Size Sampled+Range Size+CS Annual Temp.+CS Temp. Seasonality+CS Annual Precip.+CS Precip. Seasonality+Elevation+Tarsus Length+Hand Wing Index+Migratory Distance+Landscape Ruggedness	<0.001	0.359	334.087	0	0.043
phylog.struct.crown.climate.stability	Elevation	Phylogeographic Structure (0.9) ~ Mean Crown Age+Prop. Range Size Sampled+Range Size+CS Annual Temp.+CS Temp. Seasonality+CS Annual Precip.+CS Precip. Seasonality+Tarsus Length+Hand Wing Index+Migratory Distance+Landscape Ruggedness	<0.001	0.355	334.142	0.054	0.042
phylog.struct.crown.climate.stability	CS_bio_04	Phylogeographic Structure (0.9) ~ Mean Crown Age+Prop. Range Size Sampled+Range Size+CS Annual Temp.+CS Annual Precip.+CS Precip. Seasonality+Elevation+Tarsus Length+Hand Wing Index+Migratory Distance+Landscape Ruggedness	<0.001	0.348	336.514	2.427	0.013
phylog.struct.crown.climate.stability	Prop. Range Size Sampled	Phylogeographic Structure (0.9) ~ Mean Crown Age+Range Size+CS Annual Temp.+CS Temp. Seasonality+CS Annual Precip.+CS Precip. Seasonality+Elevation+Tarsus Length+Hand Wing Index+Migratory Distance+Landscape Ruggedness	<0.001	0.333	341.253	7.166	0.001
phylog.struct.crown.climate.stability	Age	Phylogeographic Structure (0.9) ~ Prop. Range Size Sampled+Range Size+CS Annual Temp.+CS Temp. Seasonality+CS Annual Precip.+CS Precip. Seasonality+Elevation+Tarsus Length+Hand Wing Index+Migratory Distance+Landscape Ruggedness	<0.001	0.182	383.829	49.742	0
phylog.struct.crown.lat	Hand Wing Index	Phylogeographic Structure (0.9) ~ Mean Crown Age+Prop. Range Size Sampled+Range Size+Latitude Mid.+Elevation+Tarsus Length+Migratory Distance+Landscape Ruggedness	<0.001	0.371	325.478	-2.015	0.197
phylog.struct.crown.lat	Landscape Ruggedness	Phylogeographic Structure (0.9) ~ Mean Crown Age+Prop. Range Size Sampled+Range Size+Latitude Mid.+Elevation+Tarsus Length+Hand Wing Index+Migratory Distance	<0.001	0.37	325.819	-1.674	0.166
phylog.struct.crown.lat	Range Size	Phylogeographic Structure (0.9) ~ Mean Crown Age+Prop. Range Size Sampled+Latitude Mid.+Elevation+Tarsus Length+Hand Wing Index+Migratory Distance+Landscape Ruggedness	<0.001	0.369	325.925	-1.568	0.157
phylog.struct.crown.lat	Migratory Distance	Phylogeographic Structure (0.9) ~ Mean Crown Age+Prop. Range Size Sampled+Range Size+Latitude Mid.+Elevation+Tarsus Length+Hand Wing Index+Landscape Ruggedness	<0.001	0.369	325.956	-1.537	0.155
phylog.struct.crown.lat	Tarsus Length	Phylogeographic Structure (0.9) ~ Mean Crown Age+Prop. Range Size Sampled+Range Size+Latitude Mid.+Elevation+Hand Wing Index+Migratory Distance+Landscape Ruggedness	<0.001	0.368	326.213	-1.28	0.136
phylog.struct.crown.lat	Elevation	Phylogeographic Structure (0.9) ~ Mean Crown Age+Prop. Range Size Sampled+Range Size+Latitude Mid.+Tarsus Length+Hand Wing Index+Migratory Distance+Landscape Ruggedness	<0.001	0.367	326.8	-0.693	0.102
phylog.struct.crown.lat	Full Model	Phylogeographic Structure (0.9) ~ Mean Crown Age+Prop. Range Size Sampled+Range Size+Latitude Mid.+Elevation+Tarsus Length+Hand Wing Index+Migratory Distance+Landscape Ruggedness	<0.001	0.368	327.493	0	0.072
phylog.struct.crown.lat	Latitude Mid.	Phylogeographic Structure (0.9) ~ Mean Crown Age+Prop. Range Size Sampled+Range Size+Elevation+Tarsus Length+Hand Wing Index+Migratory Distance+Landscape Ruggedness	<0.001	0.354	330.859	3.366	0.013
phylog.struct.crown.lat	Prop. Range Size Sampled	Phylogeographic Structure (0.9) ~ Mean Crown Age+Range Size+Latitude Mid.+Elevation+Tarsus Length+Hand Wing Index+Migratory Distance+Landscape Ruggedness	<0.001	0.341	334.924	7.431	0.002
phylog.struct.crown.lat	Age	Phylogeographic Structure (0.9) ~ Prop. Range Size Sampled+Range Size+Latitude Mid.+Elevation+Tarsus Length+Hand Wing Index+Migratory Distance+Landscape Ruggedness	<0.001	0.207	373.647	46.154	0
phylog.struct.crown.NPP	Hand Wing Index	Phylogeographic Structure (0.9) ~ Mean Crown Age+Prop. Range Size Sampled+Range Size+NPP+Elevation+Tarsus Length+Migratory Distance+Landscape Ruggedness	<0.001	0.363	327.975	-2.145	0.192
phylog.struct.crown.NPP	Range Size	Phylogeographic Structure (0.9) ~ Mean Crown Age+Prop. Range Size Sampled+NPP+Elevation+Tarsus Length+Hand Wing Index+Migratory Distance+Landscape Ruggedness	<0.001	0.362	328.139	-1.982	0.176
phylog.struct.crown.NPP	Landscape Ruggedness	Phylogeographic Structure (0.9) ~ Mean Crown Age+Prop. Range Size Sampled+Range Size+NPP+Elevation+Tarsus Length+Hand Wing Index+Migratory Distance	<0.001	0.362	328.302	-1.818	0.163
phylog.struct.crown.NPP	Migratory Distance	Phylogeographic Structure (0.9) ~ Mean Crown Age+Prop. Range Size Sampled+Range Size+NPP+Elevation+Tarsus Length+Hand Wing Index+Landscape Ruggedness	<0.001	0.361	328.593	-1.527	0.141
phylog.struct.crown.NPP	Tarsus Length	Phylogeographic Structure (0.9) ~ Mean Crown Age+Prop. Range Size Sampled+Range Size+NPP+Elevation+Hand Wing Index+Migratory Distance+Landscape Ruggedness	<0.001	0.361	328.612	-1.508	0.139
phylog.struct.crown.NPP	Elevation	Phylogeographic Structure (0.9) ~ Mean Crown Age+Prop. Range Size Sampled+Range Size+NPP+Tarsus Length+Hand Wing Index+Migratory Distance+Landscape Ruggedness	<0.001	0.357	329.769	-0.352	0.078
phylog.struct.crown.NPP	Full Model	Phylogeographic Structure (0.9) ~ Mean Crown Age+Prop. Range Size Sampled+Range Size+NPP+Elevation+Tarsus Length+Hand Wing Index+Migratory Distance+Landscape Ruggedness	<0.001	0.36	330.12	0	0.066
phylog.struct.crown.NPP	NPP	Phylogeographic Structure (0.9) ~ Mean Crown Age+Prop. Range Size Sampled+Range Size+Elevation+Tarsus Length+Hand Wing Index+Migratory Distance+Landscape Ruggedness	<0.001	0.354	330.859	0.739	0.045
phylog.struct.crown.NPP	Prop. Range Size Sampled	Phylogeographic Structure (0.9) ~ Mean Crown Age+Range Size+NPP+Elevation+Tarsus Length+Hand Wing Index+Migratory Distance+Landscape Ruggedness	<0.001	0.328	339.035	8.915	0.001
phylog.struct.crown.NPP	Age	Phylogeographic Structure (0.9) ~ Prop. Range Size Sampled+Range Size+NPP+Elevation+Tarsus Length+Hand Wing Index+Migratory Distance+Landscape Ruggedness	<0.001	0.18	380.624	50.503	0
phylog.struct.crown.pc1	Hand Wing Index	Phylogeographic Structure (0.9) ~ Mean Crown Age+Prop. Range Size Sampled+Range Size+Bioclim PC1+Elevation+Tarsus Length+Migratory Distance+Landscape Ruggedness	<0.001	0.361	328.515	-2.143	0.197
phylog.struct.crown.pc1	Landscape Ruggedness	Phylogeographic Structure (0.9) ~ Mean Crown Age+Prop. Range Size Sampled+Range Size+Bioclim PC1+Elevation+Tarsus Length+Hand Wing Index+Migratory Distance	<0.001	0.361	328.734	-1.924	0.177
phylog.struct.crown.pc1	Tarsus Length	Phylogeographic Structure (0.9) ~ Mean Crown Age+Prop. Range Size Sampled+Range Size+Bioclim PC1+Elevation+Hand Wing Index+Migratory Distance+Landscape Ruggedness	<0.001	0.36	328.986	-1.672	0.156
phylog.struct.crown.pc1	Range Size	Phylogeographic Structure (0.9) ~ Mean Crown Age+Prop. Range Size Sampled+Bioclim PC1+Elevation+Tarsus Length+Hand Wing Index+Migratory Distance+Landscape Ruggedness	<0.001	0.36	329.073	-1.585	0.149
phylog.struct.crown.pc1	Migratory Distance	Phylogeographic Structure (0.9) ~ Mean Crown Age+Prop. Range Size Sampled+Range Size+Bioclim PC1+Elevation+Tarsus Length+Hand Wing Index+Landscape Ruggedness	<0.001	0.359	329.202	-1.456	0.14
phylog.struct.crown.pc1	Full Model	Phylogeographic Structure (0.9) ~ Mean Crown Age+Prop. Range Size Sampled+Range Size+Bioclim PC1+Elevation+Tarsus Length+Hand Wing Index+Migratory Distance+Landscape Ruggedness	<0.001	0.358	330.658	0	0.068
phylog.struct.crown.pc1	Bioclim PC1	Phylogeographic Structure (0.9) ~ Mean Crown Age+Prop. Range Size Sampled+Range Size+Elevation+Tarsus Length+Hand Wing Index+Migratory Distance+Landscape Ruggedness	<0.001	0.354	330.859	0.201	0.061
phylog.struct.crown.pc1	Elevation	Phylogeographic Structure (0.9) ~ Mean Crown Age+Prop. Range Size Sampled+Range Size+Bioclim PC1+Tarsus Length+Hand Wing Index+Migratory Distance+Landscape Ruggedness	<0.001	0.353	331.189	0.531	0.052
phylog.struct.crown.pc1	Prop. Range Size Sampled	Phylogeographic Structure (0.9) ~ Mean Crown Age+Range Size+Bioclim PC1+Elevation+Tarsus Length+Hand Wing Index+Migratory Distance+Landscape Ruggedness	<0.001	0.329	338.92	8.262	0.001
phylog.struct.crown.pc1	Age	Phylogeographic Structure (0.9) ~ Prop. Range Size Sampled+Range Size+Bioclim PC1+Elevation+Tarsus Length+Hand Wing Index+Migratory Distance+Landscape Ruggedness	<0.001	0.179	380.895	50.237	0
phylog.struct.stem.climate.breadth	Hand Wing Index	Phylogeographic Structure (0.9) ~ Mean Stem Age+Prop. Range Size Sampled+Range Size+Annual Temp. Range+Temp. Seasonality Range+Annual Precip.+Precip. Seasonality+Elevational Range+Tarsus Length+Migratory Distance+Landscape Ruggedness	<0.001	0.243	367.685	-2.275	0.172
phylog.struct.stem.climate.breadth	RANGE.bio1	Phylogeographic Structure (0.9) ~ Mean Stem Age+Prop. Range Size Sampled+Range Size+Temp. Seasonality Range+Annual Precip.+Precip. Seasonality+Elevational Range+Tarsus Length+Hand Wing Index+Migratory Distance+Landscape Ruggedness	<0.001	0.242	367.97	-1.99	0.15
phylog.struct.stem.climate.breadth	RANGE.bio15	Phylogeographic Structure (0.9) ~ Mean Stem Age+Prop. Range Size Sampled+Range Size+Annual Temp. Range+Temp. Seasonality Range+Annual Precip.+Elevational Range+Tarsus Length+Hand Wing Index+Migratory Distance+Landscape Ruggedness	<0.001	0.241	368.125	-1.835	0.138
phylog.struct.stem.climate.breadth	Elevation	Phylogeographic Structure (0.9) ~ Mean Stem Age+Prop. Range Size Sampled+Range Size+Annual Temp. Range+Temp. Seasonality Range+Annual Precip.+Precip. Seasonality+Tarsus Length+Hand Wing Index+Migratory Distance+Landscape Ruggedness	<0.001	0.239	368.671	-1.288	0.105
phylog.struct.stem.climate.breadth	RANGE.bio4	Phylogeographic Structure (0.9) ~ Mean Stem Age+Prop. Range Size Sampled+Range Size+Annual Temp. Range+Annual Precip.+Precip. Seasonality+Elevational Range+Tarsus Length+Hand Wing Index+Migratory Distance+Landscape Ruggedness	<0.001	0.239	368.807	-1.153	0.098
phylog.struct.stem.climate.breadth	Landscape Ruggedness	Phylogeographic Structure (0.9) ~ Mean Stem Age+Prop. Range Size Sampled+Range Size+Annual Temp. Range+Temp. Seasonality Range+Annual Precip.+Precip. Seasonality+Elevational Range+Tarsus Length+Hand Wing Index+Migratory Distance	<0.001	0.238	369.068	-0.891	0.086
phylog.struct.stem.climate.breadth	Migratory Distance	Phylogeographic Structure (0.9) ~ Mean Stem Age+Prop. Range Size Sampled+Range Size+Annual Temp. Range+Temp. Seasonality Range+Annual Precip.+Precip. Seasonality+Elevational Range+Tarsus Length+Hand Wing Index+Landscape Ruggedness	<0.001	0.236	369.531	-0.429	0.069
phylog.struct.stem.climate.breadth	Tarsus Length	Phylogeographic Structure (0.9) ~ Mean Stem Age+Prop. Range Size Sampled+Range Size+Annual Temp. Range+Temp. Seasonality Range+Annual Precip.+Precip. Seasonality+Elevational Range+Hand Wing Index+Migratory Distance+Landscape Ruggedness	<0.001	0.234	369.918	-0.041	0.056
phylog.struct.stem.climate.breadth	Full Model	Phylogeographic Structure (0.9) ~ Mean Stem Age+Prop. Range Size Sampled+Range Size+Annual Temp. Range+Temp. Seasonality Range+Annual Precip.+Precip. Seasonality+Elevational Range+Tarsus Length+Hand Wing Index+Migratory Distance+Landscape Ruggedness	<0.001	0.239	369.96	0	0.055
phylog.struct.stem.climate.breadth	Range Size	Phylogeographic Structure (0.9) ~ Mean Stem Age+Prop. Range Size Sampled+Annual Temp. Range+Temp. Seasonality Range+Annual Precip.+Precip. Seasonality+Elevational Range+Tarsus Length+Hand Wing Index+Migratory Distance+Landscape Ruggedness	<0.001	0.234	370.103	0.143	0.051
phylog.struct.stem.climate.breadth	RANGE.bio12	Phylogeographic Structure (0.9) ~ Mean Stem Age+Prop. Range Size Sampled+Range Size+Annual Temp. Range+Temp. Seasonality Range+Precip. Seasonality+Elevational Range+Tarsus Length+Hand Wing Index+Migratory Distance+Landscape Ruggedness	<0.001	0.226	372.297	2.337	0.017
phylog.struct.stem.climate.breadth	Prop. Range Size Sampled	Phylogeographic Structure (0.9) ~ Mean Stem Age+Range Size+Annual Temp. Range+Temp. Seasonality Range+Annual Precip.+Precip. Seasonality+Elevational Range+Tarsus Length+Hand Wing Index+Migratory Distance+Landscape Ruggedness	<0.001	0.2	379.121	9.161	0.001
phylog.struct.stem.climate.breadth	Age	Phylogeographic Structure (0.9) ~ Prop. Range Size Sampled+Range Size+Annual Temp. Range+Temp. Seasonality Range+Annual Precip.+Precip. Seasonality+Elevational Range+Tarsus Length+Hand Wing Index+Migratory Distance+Landscape Ruggedness	<0.001	0.174	385.778	15.818	0
phylog.struct.stem.climate.stability	Hand Wing Index	Phylogeographic Structure (0.9) ~ Mean Stem Age+Prop. Range Size Sampled+Range Size+CS Annual Temp.+CS Temp. Seasonality+CS Annual Precip.+CS Precip. Seasonality+Elevation+Tarsus Length+Migratory Distance+Landscape Ruggedness	<0.001	0.245	367.098	-2.24	0.173
phylog.struct.stem.climate.stability	CS_bio_15	Phylogeographic Structure (0.9) ~ Mean Stem Age+Prop. Range Size Sampled+Range Size+CS Annual Temp.+CS Temp. Seasonality+CS Annual Precip.+Elevation+Tarsus Length+Hand Wing Index+Migratory Distance+Landscape Ruggedness	<0.001	0.245	367.103	-2.235	0.173
phylog.struct.stem.climate.stability	Landscape Ruggedness	Phylogeographic Structure (0.9) ~ Mean Stem Age+Prop. Range Size Sampled+Range Size+CS Annual Temp.+CS Temp. Seasonality+CS Annual Precip.+CS Precip. Seasonality+Elevation+Tarsus Length+Hand Wing Index+Migratory Distance	<0.001	0.244	367.182	-2.156	0.166
phylog.struct.stem.climate.stability	CS_bio_01	Phylogeographic Structure (0.9) ~ Mean Stem Age+Prop. Range Size Sampled+Range Size+CS Temp. Seasonality+CS Annual Precip.+CS Precip. Seasonality+Elevation+Tarsus Length+Hand Wing Index+Migratory Distance+Landscape Ruggedness	<0.001	0.242	367.794	-1.544	0.122
phylog.struct.stem.climate.stability	CS_bio_12	Phylogeographic Structure (0.9) ~ Mean Stem Age+Prop. Range Size Sampled+Range Size+CS Annual Temp.+CS Temp. Seasonality+CS Precip. Seasonality+Elevation+Tarsus Length+Hand Wing Index+Migratory Distance+Landscape Ruggedness	<0.001	0.24	368.353	-0.985	0.093
phylog.struct.stem.climate.stability	Tarsus Length	Phylogeographic Structure (0.9) ~ Mean Stem Age+Prop. Range Size Sampled+Range Size+CS Annual Temp.+CS Temp. Seasonality+CS Annual Precip.+CS Precip. Seasonality+Elevation+Hand Wing Index+Migratory Distance+Landscape Ruggedness	<0.001	0.24	368.507	-0.831	0.086
phylog.struct.stem.climate.stability	Migratory Distance	Phylogeographic Structure (0.9) ~ Mean Stem Age+Prop. Range Size Sampled+Range Size+CS Annual Temp.+CS Temp. Seasonality+CS Annual Precip.+CS Precip. Seasonality+Elevation+Tarsus Length+Hand Wing Index+Landscape Ruggedness	<0.001	0.239	368.781	-0.557	0.075
phylog.struct.stem.climate.stability	Full Model	Phylogeographic Structure (0.9) ~ Mean Stem Age+Prop. Range Size Sampled+Range Size+CS Annual Temp.+CS Temp. Seasonality+CS Annual Precip.+CS Precip. Seasonality+Elevation+Tarsus Length+Hand Wing Index+Migratory Distance+Landscape Ruggedness	<0.001	0.241	369.338	0	0.057
phylog.struct.stem.climate.stability	Elevation	Phylogeographic Structure (0.9) ~ Mean Stem Age+Prop. Range Size Sampled+Range Size+CS Annual Temp.+CS Temp. Seasonality+CS Annual Precip.+CS Precip. Seasonality+Tarsus Length+Hand Wing Index+Migratory Distance+Landscape Ruggedness	<0.001	0.234	370.132	0.794	0.038
phylog.struct.stem.climate.stability	Range Size	Phylogeographic Structure (0.9) ~ Mean Stem Age+Prop. Range Size Sampled+CS Annual Temp.+CS Temp. Seasonality+CS Annual Precip.+CS Precip. Seasonality+Elevation+Tarsus Length+Hand Wing Index+Migratory Distance+Landscape Ruggedness	<0.001	0.225	372.561	3.223	0.011
phylog.struct.stem.climate.stability	CS_bio_04	Phylogeographic Structure (0.9) ~ Mean Stem Age+Prop. Range Size Sampled+Range Size+CS Annual Temp.+CS Annual Precip.+CS Precip. Seasonality+Elevation+Tarsus Length+Hand Wing Index+Migratory Distance+Landscape Ruggedness	<0.001	0.22	373.82	4.482	0.006
phylog.struct.stem.climate.stability	Prop. Range Size Sampled	Phylogeographic Structure (0.9) ~ Mean Stem Age+Range Size+CS Annual Temp.+CS Temp. Seasonality+CS Annual Precip.+CS Precip. Seasonality+Elevation+Tarsus Length+Hand Wing Index+Migratory Distance+Landscape Ruggedness	<0.001	0.197	379.871	10.533	0
phylog.struct.stem.climate.stability	Age	Phylogeographic Structure (0.9) ~ Prop. Range Size Sampled+Range Size+CS Annual Temp.+CS Temp. Seasonality+CS Annual Precip.+CS Precip. Seasonality+Elevation+Tarsus Length+Hand Wing Index+Migratory Distance+Landscape Ruggedness	<0.001	0.182	383.829	14.491	0
phylog.struct.stem.lat	Landscape Ruggedness	Phylogeographic Structure (0.9) ~ Mean Stem Age+Prop. Range Size Sampled+Range Size+Latitude Mid.+Elevation+Tarsus Length+Hand Wing Index+Migratory Distance	<0.001	0.27	356.488	-2.137	0.26
phylog.struct.stem.lat	Hand Wing Index	Phylogeographic Structure (0.9) ~ Mean Stem Age+Prop. Range Size Sampled+Range Size+Latitude Mid.+Elevation+Tarsus Length+Migratory Distance+Landscape Ruggedness	<0.001	0.27	356.534	-2.091	0.254
phylog.struct.stem.lat	Migratory Distance	Phylogeographic Structure (0.9) ~ Mean Stem Age+Prop. Range Size Sampled+Range Size+Latitude Mid.+Elevation+Tarsus Length+Hand Wing Index+Landscape Ruggedness	<0.001	0.266	357.573	-1.051	0.151
phylog.struct.stem.lat	Elevation	Phylogeographic Structure (0.9) ~ Mean Stem Age+Prop. Range Size Sampled+Range Size+Latitude Mid.+Tarsus Length+Hand Wing Index+Migratory Distance+Landscape Ruggedness	<0.001	0.264	358.101	-0.524	0.116
phylog.struct.stem.lat	Tarsus Length	Phylogeographic Structure (0.9) ~ Mean Stem Age+Prop. Range Size Sampled+Range Size+Latitude Mid.+Elevation+Hand Wing Index+Migratory Distance+Landscape Ruggedness	<0.001	0.264	358.277	-0.347	0.106
phylog.struct.stem.lat	Full Model	Phylogeographic Structure (0.9) ~ Mean Stem Age+Prop. Range Size Sampled+Range Size+Latitude Mid.+Elevation+Tarsus Length+Hand Wing Index+Migratory Distance+Landscape Ruggedness	<0.001	0.266	358.625	0	0.089
phylog.struct.stem.lat	Range Size	Phylogeographic Structure (0.9) ~ Mean Stem Age+Prop. Range Size Sampled+Latitude Mid.+Elevation+Tarsus Length+Hand Wing Index+Migratory Distance+Landscape Ruggedness	<0.001	0.253	361.386	2.761	0.022
phylog.struct.stem.lat	Prop. Range Size Sampled	Phylogeographic Structure (0.9) ~ Mean Stem Age+Range Size+Latitude Mid.+Elevation+Tarsus Length+Hand Wing Index+Migratory Distance+Landscape Ruggedness	<0.001	0.23	367.638	9.014	0.001
phylog.struct.stem.lat	Latitude Mid.	Phylogeographic Structure (0.9) ~ Mean Stem Age+Prop. Range Size Sampled+Range Size+Elevation+Tarsus Length+Hand Wing Index+Migratory Distance+Landscape Ruggedness	<0.001	0.21	372.9	14.276	0
phylog.struct.stem.lat	Age	Phylogeographic Structure (0.9) ~ Prop. Range Size Sampled+Range Size+Latitude Mid.+Elevation+Tarsus Length+Hand Wing Index+Migratory Distance+Landscape Ruggedness	<0.001	0.207	373.647	15.022	0
phylog.struct.stem.NPP	Hand Wing Index	Phylogeographic Structure (0.9) ~ Mean Stem Age+Prop. Range Size Sampled+Range Size+NPP+Elevation+Tarsus Length+Migratory Distance+Landscape Ruggedness	<0.001	0.247	362.978	-2.206	0.262
phylog.struct.stem.NPP	Landscape Ruggedness	Phylogeographic Structure (0.9) ~ Mean Stem Age+Prop. Range Size Sampled+Range Size+NPP+Elevation+Tarsus Length+Hand Wing Index+Migratory Distance	<0.001	0.247	362.98	-2.204	0.262
phylog.struct.stem.NPP	Migratory Distance	Phylogeographic Structure (0.9) ~ Mean Stem Age+Prop. Range Size Sampled+Range Size+NPP+Elevation+Tarsus Length+Hand Wing Index+Landscape Ruggedness	<0.001	0.242	364.359	-0.825	0.131
phylog.struct.stem.NPP	Tarsus Length	Phylogeographic Structure (0.9) ~ Mean Stem Age+Prop. Range Size Sampled+Range Size+NPP+Elevation+Hand Wing Index+Migratory Distance+Landscape Ruggedness	<0.001	0.241	364.459	-0.725	0.125
phylog.struct.stem.NPP	Full Model	Phylogeographic Structure (0.9) ~ Mean Stem Age+Prop. Range Size Sampled+Range Size+NPP+Elevation+Tarsus Length+Hand Wing Index+Migratory Distance+Landscape Ruggedness	<0.001	0.243	365.185	0	0.087
phylog.struct.stem.NPP	Elevation	Phylogeographic Structure (0.9) ~ Mean Stem Age+Prop. Range Size Sampled+Range Size+NPP+Tarsus Length+Hand Wing Index+Migratory Distance+Landscape Ruggedness	<0.001	0.238	365.367	0.182	0.079
phylog.struct.stem.NPP	Range Size	Phylogeographic Structure (0.9) ~ Mean Stem Age+Prop. Range Size Sampled+NPP+Elevation+Tarsus Length+Hand Wing Index+Migratory Distance+Landscape Ruggedness	<0.001	0.235	366.221	1.037	0.052
phylog.struct.stem.NPP	NPP	Phylogeographic Structure (0.9) ~ Mean Stem Age+Prop. Range Size Sampled+Range Size+Elevation+Tarsus Length+Hand Wing Index+Migratory Distance+Landscape Ruggedness	<0.001	0.21	372.9	7.716	0.002
phylog.struct.stem.NPP	Prop. Range Size Sampled	Phylogeographic Structure (0.9) ~ Mean Stem Age+Range Size+NPP+Elevation+Tarsus Length+Hand Wing Index+Migratory Distance+Landscape Ruggedness	<0.001	0.192	377.576	12.391	0
phylog.struct.stem.NPP	Age	Phylogeographic Structure (0.9) ~ Prop. Range Size Sampled+Range Size+NPP+Elevation+Tarsus Length+Hand Wing Index+Migratory Distance+Landscape Ruggedness	<0.001	0.18	380.624	15.439	0
phylog.struct.stem.pc1	Hand Wing Index	Phylogeographic Structure (0.9) ~ Mean Stem Age+Prop. Range Size Sampled+Range Size+Bioclim PC1+Elevation+Tarsus Length+Migratory Distance+Landscape Ruggedness	<0.001	0.247	363.01	-2.201	0.296
phylog.struct.stem.pc1	Landscape Ruggedness	Phylogeographic Structure (0.9) ~ Mean Stem Age+Prop. Range Size Sampled+Range Size+Bioclim PC1+Elevation+Tarsus Length+Hand Wing Index+Migratory Distance	<0.001	0.247	363.019	-2.192	0.294
phylog.struct.stem.pc1	Tarsus Length	Phylogeographic Structure (0.9) ~ Mean Stem Age+Prop. Range Size Sampled+Range Size+Bioclim PC1+Elevation+Hand Wing Index+Migratory Distance+Landscape Ruggedness	<0.001	0.242	364.22	-0.992	0.162
phylog.struct.stem.pc1	Migratory Distance	Phylogeographic Structure (0.9) ~ Mean Stem Age+Prop. Range Size Sampled+Range Size+Bioclim PC1+Elevation+Tarsus Length+Hand Wing Index+Landscape Ruggedness	<0.001	0.239	365.082	-0.13	0.105
phylog.struct.stem.pc1	Full Model	Phylogeographic Structure (0.9) ~ Mean Stem Age+Prop. Range Size Sampled+Range Size+Bioclim PC1+Elevation+Tarsus Length+Hand Wing Index+Migratory Distance+Landscape Ruggedness	<0.001	0.243	365.211	0	0.098
phylog.struct.stem.pc1	Elevation	Phylogeographic Structure (0.9) ~ Mean Stem Age+Prop. Range Size Sampled+Range Size+Bioclim PC1+Tarsus Length+Hand Wing Index+Migratory Distance+Landscape Ruggedness	<0.001	0.229	367.871	2.66	0.026
phylog.struct.stem.pc1	Range Size	Phylogeographic Structure (0.9) ~ Mean Stem Age+Prop. Range Size Sampled+Bioclim PC1+Elevation+Tarsus Length+Hand Wing Index+Migratory Distance+Landscape Ruggedness	<0.001	0.225	368.828	3.617	0.016
phylog.struct.stem.pc1	Bioclim PC1	Phylogeographic Structure (0.9) ~ Mean Stem Age+Prop. Range Size Sampled+Range Size+Elevation+Tarsus Length+Hand Wing Index+Migratory Distance+Landscape Ruggedness	<0.001	0.21	372.9	7.689	0.002
phylog.struct.stem.pc1	Prop. Range Size Sampled	Phylogeographic Structure (0.9) ~ Mean Stem Age+Range Size+Bioclim PC1+Elevation+Tarsus Length+Hand Wing Index+Migratory Distance+Landscape Ruggedness	<0.001	0.197	376.285	11.074	0
phylog.struct.stem.pc1	Age	Phylogeographic Structure (0.9) ~ Prop. Range Size Sampled+Range Size+Bioclim PC1+Elevation+Tarsus Length+Hand Wing Index+Migratory Distance+Landscape Ruggedness	<0.001	0.179	380.895	15.683	0
lineage.loss.climate.breadth	Hand Wing Index	LineAge Loss ~ Prop. Range Size Sampled+Range Size+Annual Temp. Range+Temp. Seasonality Range+Annual Precip.+Precip. Seasonality+Elevational Range+Tarsus Length+Migratory Distance+Landscape Ruggedness	<0.001	0.15	-58.272	-2.25	0.287
lineage.loss.climate.breadth	RANGE.bio15	LineAge Loss ~ Prop. Range Size Sampled+Range Size+Annual Temp. Range+Temp. Seasonality Range+Annual Precip.+Elevational Range+Tarsus Length+Hand Wing Index+Migratory Distance+Landscape Ruggedness	<0.001	0.143	-56.657	-0.635	0.128
lineage.loss.climate.breadth	RANGE.bio1	LineAge Loss ~ Prop. Range Size Sampled+Range Size+Temp. Seasonality Range+Annual Precip.+Precip. Seasonality+Elevational Range+Tarsus Length+Hand Wing Index+Migratory Distance+Landscape Ruggedness	<0.001	0.142	-56.265	-0.243	0.105
lineage.loss.climate.breadth	Full Model	LineAge Loss ~ Prop. Range Size Sampled+Range Size+Annual Temp. Range+Temp. Seasonality Range+Annual Precip.+Precip. Seasonality+Elevational Range+Tarsus Length+Hand Wing Index+Migratory Distance+Landscape Ruggedness	<0.001	0.146	-56.022	0	0.093
lineage.loss.climate.breadth	Prop. Range Size Sampled	LineAge Loss ~ Range Size+Annual Temp. Range+Temp. Seasonality Range+Annual Precip.+Precip. Seasonality+Elevational Range+Tarsus Length+Hand Wing Index+Migratory Distance+Landscape Ruggedness	<0.001	0.14	-55.686	0.336	0.079
lineage.loss.climate.breadth	Tarsus Length	LineAge Loss ~ Prop. Range Size Sampled+Range Size+Annual Temp. Range+Temp. Seasonality Range+Annual Precip.+Precip. Seasonality+Elevational Range+Hand Wing Index+Migratory Distance+Landscape Ruggedness	<0.001	0.139	-55.536	0.486	0.073
lineage.loss.climate.breadth	Landscape Ruggedness	LineAge Loss ~ Prop. Range Size Sampled+Range Size+Annual Temp. Range+Temp. Seasonality Range+Annual Precip.+Precip. Seasonality+Elevational Range+Tarsus Length+Hand Wing Index+Migratory Distance	<0.001	0.138	-55.374	0.647	0.067
lineage.loss.climate.breadth	RANGE.bio4	LineAge Loss ~ Prop. Range Size Sampled+Range Size+Annual Temp. Range+Annual Precip.+Precip. Seasonality+Elevational Range+Tarsus Length+Hand Wing Index+Migratory Distance+Landscape Ruggedness	<0.001	0.136	-54.843	1.178	0.052
lineage.loss.climate.breadth	Elevation	LineAge Loss ~ Prop. Range Size Sampled+Range Size+Annual Temp. Range+Temp. Seasonality Range+Annual Precip.+Precip. Seasonality+Tarsus Length+Hand Wing Index+Migratory Distance+Landscape Ruggedness	<0.001	0.135	-54.606	1.415	0.046
lineage.loss.climate.breadth	Migratory Distance	LineAge Loss ~ Prop. Range Size Sampled+Range Size+Annual Temp. Range+Temp. Seasonality Range+Annual Precip.+Precip. Seasonality+Elevational Range+Tarsus Length+Hand Wing Index+Landscape Ruggedness	<0.001	0.135	-54.527	1.495	0.044
lineage.loss.climate.breadth	Range Size	LineAge Loss ~ Prop. Range Size Sampled+Annual Temp. Range+Temp. Seasonality Range+Annual Precip.+Precip. Seasonality+Elevational Range+Tarsus Length+Hand Wing Index+Migratory Distance+Landscape Ruggedness	<0.001	0.129	-53.141	2.88	0.022
lineage.loss.climate.breadth	RANGE.bio12	LineAge Loss ~ Prop. Range Size Sampled+Range Size+Annual Temp. Range+Temp. Seasonality Range+Precip. Seasonality+Elevational Range+Tarsus Length+Hand Wing Index+Migratory Distance+Landscape Ruggedness	<0.001	0.113	-49.415	6.606	0.003
lineage.loss.climate.stability	Hand Wing Index	LineAge Loss ~ Prop. Range Size Sampled+Range Size+CS Annual Temp.+CS Temp. Seasonality+CS Annual Precip.+CS Precip. Seasonality+Elevation+Tarsus Length+Migratory Distance+Landscape Ruggedness	<0.001	0.109	-48.377	-2.152	0.239
lineage.loss.climate.stability	CS_bio_12	LineAge Loss ~ Prop. Range Size Sampled+Range Size+CS Annual Temp.+CS Temp. Seasonality+CS Precip. Seasonality+Elevation+Tarsus Length+Hand Wing Index+Migratory Distance+Landscape Ruggedness	<0.001	0.108	-48.224	-1.999	0.222
lineage.loss.climate.stability	Elevation	LineAge Loss ~ Prop. Range Size Sampled+Range Size+CS Annual Temp.+CS Temp. Seasonality+CS Annual Precip.+CS Precip. Seasonality+Tarsus Length+Hand Wing Index+Migratory Distance+Landscape Ruggedness	<0.001	0.103	-47.03	-0.805	0.122
lineage.loss.climate.stability	CS_bio_15	LineAge Loss ~ Prop. Range Size Sampled+Range Size+CS Annual Temp.+CS Temp. Seasonality+CS Annual Precip.+Elevation+Tarsus Length+Hand Wing Index+Migratory Distance+Landscape Ruggedness	<0.001	0.102	-46.795	-0.571	0.108
lineage.loss.climate.stability	Full Model	LineAge Loss ~ Prop. Range Size Sampled+Range Size+CS Annual Temp.+CS Temp. Seasonality+CS Annual Precip.+CS Precip. Seasonality+Elevation+Tarsus Length+Hand Wing Index+Migratory Distance+Landscape Ruggedness	<0.001	0.105	-46.225	0	0.082
lineage.loss.climate.stability	CS_bio_01	LineAge Loss ~ Prop. Range Size Sampled+Range Size+CS Temp. Seasonality+CS Annual Precip.+CS Precip. Seasonality+Elevation+Tarsus Length+Hand Wing Index+Migratory Distance+Landscape Ruggedness	0.001	0.097	-45.567	0.658	0.059
lineage.loss.climate.stability	Tarsus Length	LineAge Loss ~ Prop. Range Size Sampled+Range Size+CS Annual Temp.+CS Temp. Seasonality+CS Annual Precip.+CS Precip. Seasonality+Elevation+Hand Wing Index+Migratory Distance+Landscape Ruggedness	0.001	0.096	-45.371	0.854	0.053
lineage.loss.climate.stability	CS_bio_04	LineAge Loss ~ Prop. Range Size Sampled+Range Size+CS Annual Temp.+CS Annual Precip.+CS Precip. Seasonality+Elevation+Tarsus Length+Hand Wing Index+Migratory Distance+Landscape Ruggedness	0.001	0.093	-44.747	1.478	0.039
lineage.loss.climate.stability	Prop. Range Size Sampled	LineAge Loss ~ Range Size+CS Annual Temp.+CS Temp. Seasonality+CS Annual Precip.+CS Precip. Seasonality+Elevation+Tarsus Length+Hand Wing Index+Migratory Distance+Landscape Ruggedness	0.001	0.09	-43.975	2.25	0.026
lineage.loss.climate.stability	Migratory Distance	LineAge Loss ~ Prop. Range Size Sampled+Range Size+CS Annual Temp.+CS Temp. Seasonality+CS Annual Precip.+CS Precip. Seasonality+Elevation+Tarsus Length+Hand Wing Index+Landscape Ruggedness	0.001	0.09	-43.926	2.299	0.026
lineage.loss.climate.stability	Landscape Ruggedness	LineAge Loss ~ Prop. Range Size Sampled+Range Size+CS Annual Temp.+CS Temp. Seasonality+CS Annual Precip.+CS Precip. Seasonality+Elevation+Tarsus Length+Hand Wing Index+Migratory Distance	0.001	0.089	-43.654	2.571	0.023
lineage.loss.climate.stability	Range Size	LineAge Loss ~ Prop. Range Size Sampled+CS Annual Temp.+CS Temp. Seasonality+CS Annual Precip.+CS Precip. Seasonality+Elevation+Tarsus Length+Hand Wing Index+Migratory Distance+Landscape Ruggedness	0.01	0.063	-37.993	8.232	0.001
lineage.loss.latitude	Elevation	LineAge Loss ~ Prop. Range Size Sampled+Range Size+Latitude Mid.+Tarsus Length+Hand Wing Index+Migratory Distance+Landscape Ruggedness	<0.001	0.149	-61.411	-1.548	0.266
lineage.loss.latitude	Hand Wing Index	LineAge Loss ~ Prop. Range Size Sampled+Range Size+Latitude Mid.+Elevation+Tarsus Length+Migratory Distance+Landscape Ruggedness	<0.001	0.149	-61.373	-1.51	0.261
lineage.loss.latitude	Landscape Ruggedness	LineAge Loss ~ Prop. Range Size Sampled+Range Size+Latitude Mid.+Elevation+Tarsus Length+Hand Wing Index+Migratory Distance	<0.001	0.144	-60.168	-0.306	0.143
lineage.loss.latitude	Full Model	LineAge Loss ~ Prop. Range Size Sampled+Range Size+Latitude Mid.+Elevation+Tarsus Length+Hand Wing Index+Migratory Distance+Landscape Ruggedness	<0.001	0.147	-59.863	0	0.123
lineage.loss.latitude	Prop. Range Size Sampled	LineAge Loss ~ Range Size+Latitude Mid.+Elevation+Tarsus Length+Hand Wing Index+Migratory Distance+Landscape Ruggedness	<0.001	0.141	-59.457	0.405	0.1
lineage.loss.latitude	Migratory Distance	LineAge Loss ~ Prop. Range Size Sampled+Range Size+Latitude Mid.+Elevation+Tarsus Length+Hand Wing Index+Landscape Ruggedness	<0.001	0.137	-58.478	1.385	0.061
lineage.loss.latitude	Tarsus Length	LineAge Loss ~ Prop. Range Size Sampled+Range Size+Latitude Mid.+Elevation+Hand Wing Index+Migratory Distance+Landscape Ruggedness	<0.001	0.134	-57.761	2.102	0.043
lineage.loss.latitude	Range Size	LineAge Loss ~ Prop. Range Size Sampled+Latitude Mid.+Elevation+Tarsus Length+Hand Wing Index+Migratory Distance+Landscape Ruggedness	<0.001	0.105	-50.921	8.942	0.001
lineage.loss.latitude	Latitude Mid.	LineAge Loss ~ Prop. Range Size Sampled+Range Size+Elevation+Tarsus Length+Hand Wing Index+Migratory Distance+Landscape Ruggedness	0.001	0.084	-44.587	15.276	0
lineage.loss.NPP	Hand Wing Index	LineAge Loss ~ Prop. Range Size Sampled+Range Size+NPP+Elevation+Tarsus Length+Migratory Distance+Landscape Ruggedness	<0.001	0.119	-54.275	-1.977	0.363
lineage.loss.NPP	Elevation	LineAge Loss ~ Prop. Range Size Sampled+Range Size+NPP+Tarsus Length+Hand Wing Index+Migratory Distance+Landscape Ruggedness	<0.001	0.115	-53.275	-0.976	0.22
lineage.loss.NPP	Full Model	LineAge Loss ~ Prop. Range Size Sampled+Range Size+NPP+Elevation+Tarsus Length+Hand Wing Index+Migratory Distance+Landscape Ruggedness	<0.001	0.116	-52.299	0	0.135
lineage.loss.NPP	Landscape Ruggedness	LineAge Loss ~ Prop. Range Size Sampled+Range Size+NPP+Elevation+Tarsus Length+Hand Wing Index+Migratory Distance	<0.001	0.109	-51.954	0.344	0.114
lineage.loss.NPP	Tarsus Length	LineAge Loss ~ Prop. Range Size Sampled+Range Size+NPP+Elevation+Hand Wing Index+Migratory Distance+Landscape Ruggedness	<0.001	0.104	-50.806	1.493	0.064
lineage.loss.NPP	Migratory Distance	LineAge Loss ~ Prop. Range Size Sampled+Range Size+NPP+Elevation+Tarsus Length+Hand Wing Index+Landscape Ruggedness	<0.001	0.104	-50.63	1.668	0.059
lineage.loss.NPP	Prop. Range Size Sampled	LineAge Loss ~ Range Size+NPP+Elevation+Tarsus Length+Hand Wing Index+Migratory Distance+Landscape Ruggedness	<0.001	0.099	-49.543	2.756	0.034
lineage.loss.NPP	Range Size	LineAge Loss ~ Prop. Range Size Sampled+NPP+Elevation+Tarsus Length+Hand Wing Index+Migratory Distance+Landscape Ruggedness	0.001	0.086	-46.496	5.803	0.007
lineage.loss.NPP	NPP	LineAge Loss ~ Prop. Range Size Sampled+Range Size+Elevation+Tarsus Length+Hand Wing Index+Migratory Distance+Landscape Ruggedness	0.001	0.085	-44.884	7.415	0.003
lineage.loss.pc1	Hand Wing Index	LineAge Loss ~ Prop. Range Size Sampled+Range Size+Bioclim PC1+Elevation+Tarsus Length+Migratory Distance+Landscape Ruggedness	<0.001	0.131	-57.151	-1.83	0.456
lineage.loss.pc1	Full Model	LineAge Loss ~ Prop. Range Size Sampled+Range Size+Bioclim PC1+Elevation+Tarsus Length+Hand Wing Index+Migratory Distance+Landscape Ruggedness	<0.001	0.128	-55.32	0	0.183
lineage.loss.pc1	Landscape Ruggedness	LineAge Loss ~ Prop. Range Size Sampled+Range Size+Bioclim PC1+Elevation+Tarsus Length+Hand Wing Index+Migratory Distance	<0.001	0.119	-54.241	1.079	0.106
lineage.loss.pc1	Tarsus Length	LineAge Loss ~ Prop. Range Size Sampled+Range Size+Bioclim PC1+Elevation+Hand Wing Index+Migratory Distance+Landscape Ruggedness	<0.001	0.117	-53.873	1.448	0.089
lineage.loss.pc1	Elevation	LineAge Loss ~ Prop. Range Size Sampled+Range Size+Bioclim PC1+Tarsus Length+Hand Wing Index+Migratory Distance+Landscape Ruggedness	<0.001	0.115	-53.407	1.913	0.07
lineage.loss.pc1	Prop. Range Size Sampled	LineAge Loss ~ Range Size+Bioclim PC1+Elevation+Tarsus Length+Hand Wing Index+Migratory Distance+Landscape Ruggedness	<0.001	0.115	-53.376	1.944	0.069
lineage.loss.pc1	Migratory Distance	LineAge Loss ~ Prop. Range Size Sampled+Range Size+Bioclim PC1+Elevation+Tarsus Length+Hand Wing Index+Landscape Ruggedness	<0.001	0.107	-51.37	3.95	0.025
lineage.loss.pc1	Bioclim PC1	LineAge Loss ~ Prop. Range Size Sampled+Range Size+Elevation+Tarsus Length+Hand Wing Index+Migratory Distance+Landscape Ruggedness	0.001	0.084	-44.587	10.734	0.001
lineage.loss.pc1	Range Size	LineAge Loss ~ Prop. Range Size Sampled+Bioclim PC1+Elevation+Tarsus Length+Hand Wing Index+Migratory Distance+Landscape Ruggedness	0.002	0.074	-43.89	11.43	0.001
Mean Stem Age.climate.breadth	Tarsus Length	Mean Stem Age ~ Prop. Range Size Sampled+Range Size+Annual Temp. Range+Temp. Seasonality Range+Annual Precip.+Precip. Seasonality+Elevational Range+Hand Wing Index+Migratory Distance+Landscape Ruggedness	<0.001	0.305	330.248	-2.224	0.222
Mean Stem Age.climate.breadth	Landscape Ruggedness	Mean Stem Age ~ Prop. Range Size Sampled+Range Size+Annual Temp. Range+Temp. Seasonality Range+Annual Precip.+Precip. Seasonality+Elevational Range+Tarsus Length+Hand Wing Index+Migratory Distance	<0.001	0.305	330.401	-2.072	0.206
Mean Stem Age.climate.breadth	RANGE.bio4	Mean Stem Age ~ Prop. Range Size Sampled+Range Size+Annual Temp. Range+Annual Precip.+Precip. Seasonality+Elevational Range+Tarsus Length+Hand Wing Index+Migratory Distance+Landscape Ruggedness	<0.001	0.305	330.41	-2.063	0.205
Mean Stem Age.climate.breadth	Migratory Distance	Mean Stem Age ~ Prop. Range Size Sampled+Range Size+Annual Temp. Range+Temp. Seasonality Range+Annual Precip.+Precip. Seasonality+Elevational Range+Tarsus Length+Hand Wing Index+Landscape Ruggedness	<0.001	0.301	331.595	-0.878	0.113
Mean Stem Age.climate.breadth	Full Model	Mean Stem Age ~ Prop. Range Size Sampled+Range Size+Annual Temp. Range+Temp. Seasonality Range+Annual Precip.+Precip. Seasonality+Elevational Range+Tarsus Length+Hand Wing Index+Migratory Distance+Landscape Ruggedness	<0.001	0.302	332.473	0	0.073
Mean Stem Age.climate.breadth	Prop. Range Size Sampled	Mean Stem Age ~ Range Size+Annual Temp. Range+Temp. Seasonality Range+Annual Precip.+Precip. Seasonality+Elevational Range+Tarsus Length+Hand Wing Index+Migratory Distance+Landscape Ruggedness	<0.001	0.296	333.113	0.641	0.053
Mean Stem Age.climate.breadth	Hand Wing Index	Mean Stem Age ~ Prop. Range Size Sampled+Range Size+Annual Temp. Range+Temp. Seasonality Range+Annual Precip.+Precip. Seasonality+Elevational Range+Tarsus Length+Migratory Distance+Landscape Ruggedness	<0.001	0.294	333.468	0.995	0.044
Mean Stem Age.climate.breadth	RANGE.bio15	Mean Stem Age ~ Prop. Range Size Sampled+Range Size+Annual Temp. Range+Temp. Seasonality Range+Annual Precip.+Elevational Range+Tarsus Length+Hand Wing Index+Migratory Distance+Landscape Ruggedness	<0.001	0.295	333.936	1.463	0.035
Mean Stem Age.climate.breadth	RANGE.bio1	Mean Stem Age ~ Prop. Range Size Sampled+Range Size+Temp. Seasonality Range+Annual Precip.+Precip. Seasonality+Elevational Range+Tarsus Length+Hand Wing Index+Migratory Distance+Landscape Ruggedness	<0.001	0.292	334.406	1.933	0.028
Mean Stem Age.climate.breadth	Elevation	Mean Stem Age ~ Prop. Range Size Sampled+Range Size+Annual Temp. Range+Temp. Seasonality Range+Annual Precip.+Precip. Seasonality+Tarsus Length+Hand Wing Index+Migratory Distance+Landscape Ruggedness	<0.001	0.29	334.875	2.403	0.022
Mean Stem Age.climate.breadth	RANGE.bio12	Mean Stem Age ~ Prop. Range Size Sampled+Range Size+Annual Temp. Range+Temp. Seasonality Range+Precip. Seasonality+Elevational Range+Tarsus Length+Hand Wing Index+Migratory Distance+Landscape Ruggedness	<0.001	0.238	349.598	17.125	0
Mean Stem Age.climate.breadth	Range Size	Mean Stem Age ~ Prop. Range Size Sampled+Annual Temp. Range+Temp. Seasonality Range+Annual Precip.+Precip. Seasonality+Elevational Range+Tarsus Length+Hand Wing Index+Migratory Distance+Landscape Ruggedness	<0.001	0.214	356.193	23.72	0
Mean Stem Age.climate.stability	Landscape Ruggedness	Mean Stem Age ~ Prop. Range Size Sampled+Range Size+CS Annual Temp.+CS Temp. Seasonality+CS Annual Precip.+CS Precip. Seasonality+Elevation+Tarsus Length+Hand Wing Index+Migratory Distance	<0.001	0.291	335.97	-2.075	0.176
Mean Stem Age.climate.stability	CS_bio_04	Mean Stem Age ~ Prop. Range Size Sampled+Range Size+CS Annual Temp.+CS Annual Precip.+CS Precip. Seasonality+Elevation+Tarsus Length+Hand Wing Index+Migratory Distance+Landscape Ruggedness	<0.001	0.291	336.032	-2.013	0.17
Mean Stem Age.climate.stability	CS_bio_15	Mean Stem Age ~ Prop. Range Size Sampled+Range Size+CS Annual Temp.+CS Temp. Seasonality+CS Annual Precip.+Elevation+Tarsus Length+Hand Wing Index+Migratory Distance+Landscape Ruggedness	<0.001	0.29	336.213	-1.832	0.156
Mean Stem Age.climate.stability	Migratory Distance	Mean Stem Age ~ Prop. Range Size Sampled+Range Size+CS Annual Temp.+CS Temp. Seasonality+CS Annual Precip.+CS Precip. Seasonality+Elevation+Tarsus Length+Hand Wing Index+Landscape Ruggedness	<0.001	0.29	336.255	-1.79	0.152
Mean Stem Age.climate.stability	Tarsus Length	Mean Stem Age ~ Prop. Range Size Sampled+Range Size+CS Annual Temp.+CS Temp. Seasonality+CS Annual Precip.+CS Precip. Seasonality+Elevation+Hand Wing Index+Migratory Distance+Landscape Ruggedness	<0.001	0.286	337.13	-0.915	0.098
Mean Stem Age.climate.stability	Full Model	Mean Stem Age ~ Prop. Range Size Sampled+Range Size+CS Annual Temp.+CS Temp. Seasonality+CS Annual Precip.+CS Precip. Seasonality+Elevation+Tarsus Length+Hand Wing Index+Migratory Distance+Landscape Ruggedness	<0.001	0.288	338.045	0	0.062
Mean Stem Age.climate.stability	Elevation	Mean Stem Age ~ Prop. Range Size Sampled+Range Size+CS Annual Temp.+CS Temp. Seasonality+CS Annual Precip.+CS Precip. Seasonality+Tarsus Length+Hand Wing Index+Migratory Distance+Landscape Ruggedness	<0.001	0.284	338.148	0.102	0.059
Mean Stem Age.climate.stability	CS_bio_12	Mean Stem Age ~ Prop. Range Size Sampled+Range Size+CS Annual Temp.+CS Temp. Seasonality+CS Precip. Seasonality+Elevation+Tarsus Length+Hand Wing Index+Migratory Distance+Landscape Ruggedness	<0.001	0.283	338.472	0.427	0.05
Mean Stem Age.climate.stability	Prop. Range Size Sampled	Mean Stem Age ~ Range Size+CS Annual Temp.+CS Temp. Seasonality+CS Annual Precip.+CS Precip. Seasonality+Elevation+Tarsus Length+Hand Wing Index+Migratory Distance+Landscape Ruggedness	<0.001	0.282	338.548	0.503	0.048
Mean Stem Age.climate.stability	Hand Wing Index	Mean Stem Age ~ Prop. Range Size Sampled+Range Size+CS Annual Temp.+CS Temp. Seasonality+CS Annual Precip.+CS Precip. Seasonality+Elevation+Tarsus Length+Migratory Distance+Landscape Ruggedness	<0.001	0.277	339.696	1.651	0.027
Mean Stem Age.climate.stability	CS_bio_01	Mean Stem Age ~ Prop. Range Size Sampled+Range Size+CS Temp. Seasonality+CS Annual Precip.+CS Precip. Seasonality+Elevation+Tarsus Length+Hand Wing Index+Migratory Distance+Landscape Ruggedness	<0.001	0.235	351.175	13.13	0
Mean Stem Age.climate.stability	Range Size	Mean Stem Age ~ Prop. Range Size Sampled+CS Annual Temp.+CS Temp. Seasonality+CS Annual Precip.+CS Precip. Seasonality+Elevation+Tarsus Length+Hand Wing Index+Migratory Distance+Landscape Ruggedness	<0.001	0.12	380.599	42.554	0
Mean Stem Age.lat	Landscape Ruggedness	Mean Stem Age ~ Prop. Range Size Sampled+Range Size+Latitude Mid.+Elevation+Tarsus Length+Hand Wing Index+Migratory Distance	<0.001	0.301	331.247	-2.185	0.271
Mean Stem Age.lat	Prop. Range Size Sampled	Mean Stem Age ~ Range Size+Latitude Mid.+Elevation+Tarsus Length+Hand Wing Index+Migratory Distance+Landscape Ruggedness	<0.001	0.298	331.989	-1.442	0.187
Mean Stem Age.lat	Tarsus Length	Mean Stem Age ~ Prop. Range Size Sampled+Range Size+Latitude Mid.+Elevation+Hand Wing Index+Migratory Distance+Landscape Ruggedness	<0.001	0.297	332.299	-1.132	0.16
Mean Stem Age.lat	Elevation	Mean Stem Age ~ Prop. Range Size Sampled+Range Size+Latitude Mid.+Tarsus Length+Hand Wing Index+Migratory Distance+Landscape Ruggedness	<0.001	0.298	332.384	-1.047	0.154
Mean Stem Age.lat	Full Model	Mean Stem Age ~ Prop. Range Size Sampled+Range Size+Latitude Mid.+Elevation+Tarsus Length+Hand Wing Index+Migratory Distance+Landscape Ruggedness	<0.001	0.298	333.431	0	0.091
Mean Stem Age.lat	Migratory Distance	Mean Stem Age ~ Prop. Range Size Sampled+Range Size+Latitude Mid.+Elevation+Tarsus Length+Hand Wing Index+Landscape Ruggedness	<0.001	0.294	333.771	0.34	0.077
Mean Stem Age.lat	Hand Wing Index	Mean Stem Age ~ Prop. Range Size Sampled+Range Size+Latitude Mid.+Elevation+Tarsus Length+Migratory Distance+Landscape Ruggedness	<0.001	0.29	334.259	0.828	0.06
Mean Stem Age.lat	Latitude Mid.	Mean Stem Age ~ Prop. Range Size Sampled+Range Size+Elevation+Tarsus Length+Hand Wing Index+Migratory Distance+Landscape Ruggedness	<0.001	0.227	351.15	17.718	0
Mean Stem Age.lat	Range Size	Mean Stem Age ~ Prop. Range Size Sampled+Latitude Mid.+Elevation+Tarsus Length+Hand Wing Index+Migratory Distance+Landscape Ruggedness	<0.001	0.153	372.305	38.874	0
Mean Stem Age.NPP	Landscape Ruggedness	Mean Stem Age ~ Prop. Range Size Sampled+Range Size+NPP+Elevation+Tarsus Length+Hand Wing Index+Migratory Distance	<0.001	0.316	330.209	-2.184	0.314
Mean Stem Age.NPP	Tarsus Length	Mean Stem Age ~ Prop. Range Size Sampled+Range Size+NPP+Elevation+Hand Wing Index+Migratory Distance+Landscape Ruggedness	<0.001	0.311	331.134	-1.258	0.197
Mean Stem Age.NPP	Migratory Distance	Mean Stem Age ~ Prop. Range Size Sampled+Range Size+NPP+Elevation+Tarsus Length+Hand Wing Index+Landscape Ruggedness	<0.001	0.313	331.245	-1.148	0.187
Mean Stem Age.NPP	Full Model	Mean Stem Age ~ Prop. Range Size Sampled+Range Size+NPP+Elevation+Tarsus Length+Hand Wing Index+Migratory Distance+Landscape Ruggedness	<0.001	0.312	332.392	0	0.105
Mean Stem Age.NPP	Elevation	Mean Stem Age ~ Prop. Range Size Sampled+Range Size+NPP+Tarsus Length+Hand Wing Index+Migratory Distance+Landscape Ruggedness	<0.001	0.307	332.846	0.454	0.084
Mean Stem Age.NPP	Prop. Range Size Sampled	Mean Stem Age ~ Range Size+NPP+Elevation+Tarsus Length+Hand Wing Index+Migratory Distance+Landscape Ruggedness	<0.001	0.305	333.075	0.683	0.075
Mean Stem Age.NPP	Hand Wing Index	Mean Stem Age ~ Prop. Range Size Sampled+Range Size+NPP+Elevation+Tarsus Length+Migratory Distance+Landscape Ruggedness	<0.001	0.298	334.411	2.019	0.038
Mean Stem Age.NPP	NPP	Mean Stem Age ~ Prop. Range Size Sampled+Range Size+Elevation+Tarsus Length+Hand Wing Index+Migratory Distance+Landscape Ruggedness	<0.001	0.231	351.868	19.475	0
Mean Stem Age.NPP	Range Size	Mean Stem Age ~ Prop. Range Size Sampled+NPP+Elevation+Tarsus Length+Hand Wing Index+Migratory Distance+Landscape Ruggedness	<0.001	0.191	365.842	33.45	0
Mean Stem Age.pc1	Migratory Distance	Mean Stem Age ~ Prop. Range Size Sampled+Range Size+Bioclim PC1+Elevation+Tarsus Length+Hand Wing Index+Landscape Ruggedness	<0.001	0.312	329.28	-2.162	0.304
Mean Stem Age.pc1	Landscape Ruggedness	Mean Stem Age ~ Prop. Range Size Sampled+Range Size+Bioclim PC1+Elevation+Tarsus Length+Hand Wing Index+Migratory Distance	<0.001	0.312	329.301	-2.141	0.301
Mean Stem Age.pc1	Tarsus Length	Mean Stem Age ~ Prop. Range Size Sampled+Range Size+Bioclim PC1+Elevation+Hand Wing Index+Migratory Distance+Landscape Ruggedness	<0.001	0.306	330.824	-0.618	0.14
Mean Stem Age.pc1	Full Model	Mean Stem Age ~ Prop. Range Size Sampled+Range Size+Bioclim PC1+Elevation+Tarsus Length+Hand Wing Index+Migratory Distance+Landscape Ruggedness	<0.001	0.309	331.442	0	0.103
Mean Stem Age.pc1	Prop. Range Size Sampled	Mean Stem Age ~ Range Size+Bioclim PC1+Elevation+Tarsus Length+Hand Wing Index+Migratory Distance+Landscape Ruggedness	<0.001	0.304	331.456	0.014	0.102
Mean Stem Age.pc1	Hand Wing Index	Mean Stem Age ~ Prop. Range Size Sampled+Range Size+Bioclim PC1+Elevation+Tarsus Length+Migratory Distance+Landscape Ruggedness	<0.001	0.296	333.261	1.819	0.042
Mean Stem Age.pc1	Elevation	Mean Stem Age ~ Prop. Range Size Sampled+Range Size+Bioclim PC1+Tarsus Length+Hand Wing Index+Migratory Distance+Landscape Ruggedness	<0.001	0.286	336.556	5.114	0.008
Mean Stem Age.pc1	Bioclim PC1	Mean Stem Age ~ Prop. Range Size Sampled+Range Size+Elevation+Tarsus Length+Hand Wing Index+Migratory Distance+Landscape Ruggedness	<0.001	0.229	351.032	19.59	0
Mean Stem Age.pc1	Range Size	Mean Stem Age ~ Prop. Range Size Sampled+Bioclim PC1+Elevation+Tarsus Length+Hand Wing Index+Migratory Distance+Landscape Ruggedness	<0.001	0.126	378.726	47.284	0
stem.rate.climate.breadth	Hand Wing Index	Stem Splitting Rate (0.9) ~ Prop. Range Size Sampled+Range Size+Annual Temp. Range+Temp. Seasonality Range+Annual Precip.+Precip. Seasonality+Elevational Range+Tarsus Length+Migratory Distance+Landscape Ruggedness	0.026	0.05	75.576	-2.168	0.129
stem.rate.climate.breadth	RANGE.bio1	Stem Splitting Rate (0.9) ~ Prop. Range Size Sampled+Range Size+Temp. Seasonality Range+Annual Precip.+Precip. Seasonality+Elevational Range+Tarsus Length+Hand Wing Index+Migratory Distance+Landscape Ruggedness	0.027	0.05	75.632	-2.112	0.126
stem.rate.climate.breadth	Migratory Distance	Stem Splitting Rate (0.9) ~ Prop. Range Size Sampled+Range Size+Annual Temp. Range+Temp. Seasonality Range+Annual Precip.+Precip. Seasonality+Elevational Range+Tarsus Length+Hand Wing Index+Landscape Ruggedness	0.027	0.05	75.637	-2.107	0.125
stem.rate.climate.breadth	Elevation	Stem Splitting Rate (0.9) ~ Prop. Range Size Sampled+Range Size+Annual Temp. Range+Temp. Seasonality Range+Annual Precip.+Precip. Seasonality+Tarsus Length+Hand Wing Index+Migratory Distance+Landscape Ruggedness	0.027	0.05	75.675	-2.069	0.123
stem.rate.climate.breadth	RANGE.bio4	Stem Splitting Rate (0.9) ~ Prop. Range Size Sampled+Range Size+Annual Temp. Range+Annual Precip.+Precip. Seasonality+Elevational Range+Tarsus Length+Hand Wing Index+Migratory Distance+Landscape Ruggedness	0.028	0.049	75.814	-1.93	0.115
stem.rate.climate.breadth	RANGE.bio15	Stem Splitting Rate (0.9) ~ Prop. Range Size Sampled+Range Size+Annual Temp. Range+Temp. Seasonality Range+Annual Precip.+Elevational Range+Tarsus Length+Hand Wing Index+Migratory Distance+Landscape Ruggedness	0.03	0.048	76.005	-1.739	0.104
stem.rate.climate.breadth	Landscape Ruggedness	Stem Splitting Rate (0.9) ~ Prop. Range Size Sampled+Range Size+Annual Temp. Range+Temp. Seasonality Range+Annual Precip.+Precip. Seasonality+Elevational Range+Tarsus Length+Hand Wing Index+Migratory Distance	0.036	0.045	76.619	-1.125	0.077
stem.rate.climate.breadth	RANGE.bio12	Stem Splitting Rate (0.9) ~ Prop. Range Size Sampled+Range Size+Annual Temp. Range+Temp. Seasonality Range+Precip. Seasonality+Elevational Range+Tarsus Length+Hand Wing Index+Migratory Distance+Landscape Ruggedness	0.039	0.044	76.845	-0.899	0.069
stem.rate.climate.breadth	Tarsus Length	Stem Splitting Rate (0.9) ~ Prop. Range Size Sampled+Range Size+Annual Temp. Range+Temp. Seasonality Range+Annual Precip.+Precip. Seasonality+Elevational Range+Hand Wing Index+Migratory Distance+Landscape Ruggedness	0.051	0.04	77.728	-0.016	0.044
stem.rate.climate.breadth	Full Model	Stem Splitting Rate (0.9) ~ Prop. Range Size Sampled+Range Size+Annual Temp. Range+Temp. Seasonality Range+Annual Precip.+Precip. Seasonality+Elevational Range+Tarsus Length+Hand Wing Index+Migratory Distance+Landscape Ruggedness	0.04	0.046	77.744	0	0.044
stem.rate.climate.breadth	Range Size	Stem Splitting Rate (0.9) ~ Prop. Range Size Sampled+Annual Temp. Range+Temp. Seasonality Range+Annual Precip.+Precip. Seasonality+Elevational Range+Tarsus Length+Hand Wing Index+Migratory Distance+Landscape Ruggedness	0.058	0.038	78.159	0.415	0.036
stem.rate.climate.breadth	Prop. Range Size Sampled	Stem Splitting Rate (0.9) ~ Range Size+Annual Temp. Range+Temp. Seasonality Range+Annual Precip.+Precip. Seasonality+Elevational Range+Tarsus Length+Hand Wing Index+Migratory Distance+Landscape Ruggedness	0.125	0.026	80.967	3.223	0.009
stem.rate.climate.stability	Hand Wing Index	Stem Splitting Rate (0.9) ~ Prop. Range Size Sampled+Range Size+CS Annual Temp.+CS Temp. Seasonality+CS Annual Precip.+CS Precip. Seasonality+Elevation+Tarsus Length+Migratory Distance+Landscape Ruggedness	0.011	0.062	73.383	-2.251	0.152
stem.rate.climate.stability	Migratory Distance	Stem Splitting Rate (0.9) ~ Prop. Range Size Sampled+Range Size+CS Annual Temp.+CS Temp. Seasonality+CS Annual Precip.+CS Precip. Seasonality+Elevation+Tarsus Length+Hand Wing Index+Landscape Ruggedness	0.012	0.061	73.572	-2.061	0.138
stem.rate.climate.stability	CS_bio_12	Stem Splitting Rate (0.9) ~ Prop. Range Size Sampled+Range Size+CS Annual Temp.+CS Temp. Seasonality+CS Precip. Seasonality+Elevation+Tarsus Length+Hand Wing Index+Migratory Distance+Landscape Ruggedness	0.012	0.061	73.679	-1.955	0.131
stem.rate.climate.stability	CS_bio_15	Stem Splitting Rate (0.9) ~ Prop. Range Size Sampled+Range Size+CS Annual Temp.+CS Temp. Seasonality+CS Annual Precip.+Elevation+Tarsus Length+Hand Wing Index+Migratory Distance+Landscape Ruggedness	0.013	0.06	73.702	-1.931	0.129
stem.rate.climate.stability	Landscape Ruggedness	Stem Splitting Rate (0.9) ~ Prop. Range Size Sampled+Range Size+CS Annual Temp.+CS Temp. Seasonality+CS Annual Precip.+CS Precip. Seasonality+Elevation+Tarsus Length+Hand Wing Index+Migratory Distance	0.014	0.059	74.22	-1.413	0.1
stem.rate.climate.stability	CS_bio_04	Stem Splitting Rate (0.9) ~ Prop. Range Size Sampled+Range Size+CS Annual Temp.+CS Annual Precip.+CS Precip. Seasonality+Elevation+Tarsus Length+Hand Wing Index+Migratory Distance+Landscape Ruggedness	0.017	0.057	74.361	-1.273	0.093
stem.rate.climate.stability	Tarsus Length	Stem Splitting Rate (0.9) ~ Prop. Range Size Sampled+Range Size+CS Annual Temp.+CS Temp. Seasonality+CS Annual Precip.+CS Precip. Seasonality+Elevation+Hand Wing Index+Migratory Distance+Landscape Ruggedness	0.017	0.056	74.896	-0.737	0.071
stem.rate.climate.stability	CS_bio_01	Stem Splitting Rate (0.9) ~ Prop. Range Size Sampled+Range Size+CS Temp. Seasonality+CS Annual Precip.+CS Precip. Seasonality+Elevation+Tarsus Length+Hand Wing Index+Migratory Distance+Landscape Ruggedness	0.021	0.054	74.958	-0.675	0.069
stem.rate.climate.stability	Elevation	Stem Splitting Rate (0.9) ~ Prop. Range Size Sampled+Range Size+CS Annual Temp.+CS Temp. Seasonality+CS Annual Precip.+CS Precip. Seasonality+Tarsus Length+Hand Wing Index+Migratory Distance+Landscape Ruggedness	0.024	0.051	75.322	-0.311	0.058
stem.rate.climate.stability	Full Model	Stem Splitting Rate (0.9) ~ Prop. Range Size Sampled+Range Size+CS Annual Temp.+CS Temp. Seasonality+CS Annual Precip.+CS Precip. Seasonality+Elevation+Tarsus Length+Hand Wing Index+Migratory Distance+Landscape Ruggedness	0.019	0.057	75.633	0	0.049
stem.rate.climate.stability	Prop. Range Size Sampled	Stem Splitting Rate (0.9) ~ Range Size+CS Annual Temp.+CS Temp. Seasonality+CS Annual Precip.+CS Precip. Seasonality+Elevation+Tarsus Length+Hand Wing Index+Migratory Distance+Landscape Ruggedness	0.091	0.031	79.768	4.134	0.006
stem.rate.climate.stability	Range Size	Stem Splitting Rate (0.9) ~ Prop. Range Size Sampled+CS Annual Temp.+CS Temp. Seasonality+CS Annual Precip.+CS Precip. Seasonality+Elevation+Tarsus Length+Hand Wing Index+Migratory Distance+Landscape Ruggedness	0.04	0.044	80.902	5.269	0.004
stem.rate.lat	Hand Wing Index	Stem Splitting Rate (0.9) ~ Prop. Range Size Sampled+Range Size+Latitude Mid.+Elevation+Tarsus Length+Migratory Distance+Landscape Ruggedness	0.001	0.078	65.987	-2.166	0.238
stem.rate.lat	Migratory Distance	Stem Splitting Rate (0.9) ~ Prop. Range Size Sampled+Range Size+Latitude Mid.+Elevation+Tarsus Length+Hand Wing Index+Landscape Ruggedness	0.001	0.079	65.987	-2.166	0.238
stem.rate.lat	Landscape Ruggedness	Stem Splitting Rate (0.9) ~ Prop. Range Size Sampled+Range Size+Latitude Mid.+Elevation+Tarsus Length+Hand Wing Index+Migratory Distance	0.001	0.079	66.157	-1.996	0.219
stem.rate.lat	Tarsus Length	Stem Splitting Rate (0.9) ~ Prop. Range Size Sampled+Range Size+Latitude Mid.+Elevation+Hand Wing Index+Migratory Distance+Landscape Ruggedness	0.003	0.07	67.951	-0.202	0.089
stem.rate.lat	Elevation	Stem Splitting Rate (0.9) ~ Prop. Range Size Sampled+Range Size+Latitude Mid.+Tarsus Length+Hand Wing Index+Migratory Distance+Landscape Ruggedness	0.003	0.068	67.953	-0.199	0.089
stem.rate.lat	Full Model	Stem Splitting Rate (0.9) ~ Prop. Range Size Sampled+Range Size+Latitude Mid.+Elevation+Tarsus Length+Hand Wing Index+Migratory Distance+Landscape Ruggedness	0.003	0.074	68.153	0	0.081
stem.rate.lat	Latitude Mid.	Stem Splitting Rate (0.9) ~ Prop. Range Size Sampled+Range Size+Elevation+Tarsus Length+Hand Wing Index+Migratory Distance+Landscape Ruggedness	0.01	0.055	70.884	2.731	0.021
stem.rate.lat	Prop. Range Size Sampled	Stem Splitting Rate (0.9) ~ Range Size+Latitude Mid.+Elevation+Tarsus Length+Hand Wing Index+Migratory Distance+Landscape Ruggedness	0.011	0.053	71.378	3.225	0.016
stem.rate.lat	Range Size	Stem Splitting Rate (0.9) ~ Prop. Range Size Sampled+Latitude Mid.+Elevation+Tarsus Length+Hand Wing Index+Migratory Distance+Landscape Ruggedness	0.004	0.065	72.722	4.57	0.008
stem.rate.NPP	Hand Wing Index	Stem Splitting Rate (0.9) ~ Prop. Range Size Sampled+Range Size+NPP+Elevation+Tarsus Length+Migratory Distance+Landscape Ruggedness	0.002	0.071	67.88	-2.17	0.239
stem.rate.NPP	Migratory Distance	Stem Splitting Rate (0.9) ~ Prop. Range Size Sampled+Range Size+NPP+Elevation+Tarsus Length+Hand Wing Index+Landscape Ruggedness	0.002	0.072	67.915	-2.134	0.235
stem.rate.NPP	Landscape Ruggedness	Stem Splitting Rate (0.9) ~ Prop. Range Size Sampled+Range Size+NPP+Elevation+Tarsus Length+Hand Wing Index+Migratory Distance	0.002	0.072	68.131	-1.919	0.211
stem.rate.NPP	Tarsus Length	Stem Splitting Rate (0.9) ~ Prop. Range Size Sampled+Range Size+NPP+Elevation+Hand Wing Index+Migratory Distance+Landscape Ruggedness	0.005	0.064	69.825	-0.224	0.09
stem.rate.NPP	Full Model	Stem Splitting Rate (0.9) ~ Prop. Range Size Sampled+Range Size+NPP+Elevation+Tarsus Length+Hand Wing Index+Migratory Distance+Landscape Ruggedness	0.005	0.067	70.05	0	0.081
stem.rate.NPP	Elevation	Stem Splitting Rate (0.9) ~ Prop. Range Size Sampled+Range Size+NPP+Tarsus Length+Hand Wing Index+Migratory Distance+Landscape Ruggedness	0.008	0.058	70.472	0.422	0.065
stem.rate.NPP	NPP	Stem Splitting Rate (0.9) ~ Prop. Range Size Sampled+Range Size+Elevation+Tarsus Length+Hand Wing Index+Migratory Distance+Landscape Ruggedness	0.01	0.055	71.013	0.963	0.05
stem.rate.NPP	Range Size	Stem Splitting Rate (0.9) ~ Prop. Range Size Sampled+NPP+Elevation+Tarsus Length+Hand Wing Index+Migratory Distance+Landscape Ruggedness	0.004	0.065	72.796	2.747	0.02
stem.rate.NPP	Prop. Range Size Sampled	Stem Splitting Rate (0.9) ~ Range Size+NPP+Elevation+Tarsus Length+Hand Wing Index+Migratory Distance+Landscape Ruggedness	0.038	0.038	74.9	4.85	0.007
stem.rate.pc1	Hand Wing Index	Stem Splitting Rate (0.9) ~ Prop. Range Size Sampled+Range Size+Bioclim PC1+Elevation+Tarsus Length+Migratory Distance+Landscape Ruggedness	0.003	0.069	68.36	-2.183	0.247
stem.rate.pc1	Migratory Distance	Stem Splitting Rate (0.9) ~ Prop. Range Size Sampled+Range Size+Bioclim PC1+Elevation+Tarsus Length+Hand Wing Index+Landscape Ruggedness	0.003	0.068	68.481	-2.061	0.233
stem.rate.pc1	Landscape Ruggedness	Stem Splitting Rate (0.9) ~ Prop. Range Size Sampled+Range Size+Bioclim PC1+Elevation+Tarsus Length+Hand Wing Index+Migratory Distance	0.003	0.068	68.788	-1.754	0.2
stem.rate.pc1	Tarsus Length	Stem Splitting Rate (0.9) ~ Prop. Range Size Sampled+Range Size+Bioclim PC1+Elevation+Hand Wing Index+Migratory Distance+Landscape Ruggedness	0.006	0.062	70	-0.543	0.109
stem.rate.pc1	Full Model	Stem Splitting Rate (0.9) ~ Prop. Range Size Sampled+Range Size+Bioclim PC1+Elevation+Tarsus Length+Hand Wing Index+Migratory Distance+Landscape Ruggedness	0.006	0.064	70.542	0	0.083
stem.rate.pc1	Bioclim PC1	Stem Splitting Rate (0.9) ~ Prop. Range Size Sampled+Range Size+Elevation+Tarsus Length+Hand Wing Index+Migratory Distance+Landscape Ruggedness	0.01	0.055	70.984	0.441	0.067
stem.rate.pc1	Elevation	Stem Splitting Rate (0.9) ~ Prop. Range Size Sampled+Range Size+Bioclim PC1+Tarsus Length+Hand Wing Index+Migratory Distance+Landscape Ruggedness	0.013	0.051	71.753	1.21	0.045
stem.rate.pc1	Prop. Range Size Sampled	Stem Splitting Rate (0.9) ~ Range Size+Bioclim PC1+Elevation+Tarsus Length+Hand Wing Index+Migratory Distance+Landscape Ruggedness	0.037	0.038	74.694	4.152	0.01
stem.rate.pc1	Range Size	Stem Splitting Rate (0.9) ~ Prop. Range Size Sampled+Bioclim PC1+Elevation+Tarsus Length+Hand Wing Index+Migratory Distance+Landscape Ruggedness	0.042	0.037	75.787	5.245	0.006

## Sheet: AOU Age High - Model Summaries
Model Set	Variable Removed*	Description of Model (see Materials and Methods for which variables were square root converted)	P-value	adj.R2	AICc	delta AICc	AICc weight	*see Variable Key in S2 Table
Mean Crown Age.climate.stability	Migratory Distance	Mean Crown Age ~ Prop. Range Size Sampled+Range Size+CS Annual Temp.+CS Temp. Seasonality+CS Annual Precip.+CS Precip. Seasonality+Elevation+Tarsus Length+Hand Wing Index+Landscape Ruggedness	<0.001	0.306	335.902	-2.249	0.217
Mean Crown Age.climate.stability	Tarsus Length	Mean Crown Age ~ Prop. Range Size Sampled+Range Size+CS Annual Temp.+CS Temp. Seasonality+CS Annual Precip.+CS Precip. Seasonality+Elevation+Hand Wing Index+Migratory Distance+Landscape Ruggedness	<0.001	0.306	336.501	-1.65	0.161
Mean Crown Age.climate.stability	CS_bio_04	Mean Crown Age ~ Prop. Range Size Sampled+Range Size+CS Annual Temp.+CS Annual Precip.+CS Precip. Seasonality+Elevation+Tarsus Length+Hand Wing Index+Migratory Distance+Landscape Ruggedness	<0.001	0.303	336.709	-1.442	0.145
Mean Crown Age.climate.stability	CS_bio_15	Mean Crown Age ~ Prop. Range Size Sampled+Range Size+CS Annual Temp.+CS Temp. Seasonality+CS Annual Precip.+Elevation+Tarsus Length+Hand Wing Index+Migratory Distance+Landscape Ruggedness	<0.001	0.302	336.75	-1.401	0.142
Mean Crown Age.climate.stability	Hand Wing Index	Mean Crown Age ~ Prop. Range Size Sampled+Range Size+CS Annual Temp.+CS Temp. Seasonality+CS Annual Precip.+CS Precip. Seasonality+Elevation+Tarsus Length+Migratory Distance+Landscape Ruggedness	<0.001	0.299	337.348	-0.803	0.105
Mean Crown Age.climate.stability	Full Model	Mean Crown Age ~ Prop. Range Size Sampled+Range Size+CS Annual Temp.+CS Temp. Seasonality+CS Annual Precip.+CS Precip. Seasonality+Elevation+Tarsus Length+Hand Wing Index+Migratory Distance+Landscape Ruggedness	<0.001	0.302	338.151	0	0.071
Mean Crown Age.climate.stability	Elevation	Mean Crown Age ~ Prop. Range Size Sampled+Range Size+CS Annual Temp.+CS Temp. Seasonality+CS Annual Precip.+CS Precip. Seasonality+Tarsus Length+Hand Wing Index+Migratory Distance+Landscape Ruggedness	<0.001	0.298	338.498	0.347	0.059
Mean Crown Age.climate.stability	CS_bio_12	Mean Crown Age ~ Prop. Range Size Sampled+Range Size+CS Annual Temp.+CS Temp. Seasonality+CS Precip. Seasonality+Elevation+Tarsus Length+Hand Wing Index+Migratory Distance+Landscape Ruggedness	<0.001	0.299	338.914	0.763	0.048
Mean Crown Age.climate.stability	Landscape Ruggedness	Mean Crown Age ~ Prop. Range Size Sampled+Range Size+CS Annual Temp.+CS Temp. Seasonality+CS Annual Precip.+CS Precip. Seasonality+Elevation+Tarsus Length+Hand Wing Index+Migratory Distance	<0.001	0.294	339.047	0.896	0.045
Mean Crown Age.climate.stability	Prop. Range Size Sampled	Mean Crown Age ~ Range Size+CS Annual Temp.+CS Temp. Seasonality+CS Annual Precip.+CS Precip. Seasonality+Elevation+Tarsus Length+Hand Wing Index+Migratory Distance+Landscape Ruggedness	<0.001	0.281	343.369	5.218	0.005
Mean Crown Age.climate.stability	CS_bio_01	Mean Crown Age ~ Prop. Range Size Sampled+Range Size+CS Temp. Seasonality+CS Annual Precip.+CS Precip. Seasonality+Elevation+Tarsus Length+Hand Wing Index+Migratory Distance+Landscape Ruggedness	<0.001	0.249	348.207	10.056	0
Mean Crown Age.climate.stability	Range Size	Mean Crown Age ~ Prop. Range Size Sampled+CS Annual Temp.+CS Temp. Seasonality+CS Annual Precip.+CS Precip. Seasonality+Elevation+Tarsus Length+Hand Wing Index+Migratory Distance+Landscape Ruggedness	<0.001	0.108	384.323	46.172	0
Mean Crown Age.latitude	Migratory Distance	Mean Crown Age ~ Prop. Range Size Sampled+Range Size+Latitude Mid.+Elevation+Tarsus Length+Hand Wing Index+Landscape Ruggedness	<0.001	0.358	321.586	-1.882	0.237
Mean Crown Age.latitude	Tarsus Length	Mean Crown Age ~ Prop. Range Size Sampled+Range Size+Latitude Mid.+Elevation+Hand Wing Index+Migratory Distance+Landscape Ruggedness	<0.001	0.356	322.149	-1.319	0.179
Mean Crown Age.latitude	Hand Wing Index	Mean Crown Age ~ Prop. Range Size Sampled+Range Size+Latitude Mid.+Elevation+Tarsus Length+Migratory Distance+Landscape Ruggedness	<0.001	0.354	322.216	-1.251	0.173
Mean Crown Age.latitude	Elevation	Mean Crown Age ~ Prop. Range Size Sampled+Range Size+Latitude Mid.+Tarsus Length+Hand Wing Index+Migratory Distance+Landscape Ruggedness	<0.001	0.355	322.545	-0.923	0.147
Mean Crown Age.latitude	Landscape Ruggedness	Mean Crown Age ~ Prop. Range Size Sampled+Range Size+Latitude Mid.+Elevation+Tarsus Length+Hand Wing Index+Migratory Distance	<0.001	0.352	322.78	-0.688	0.13
Mean Crown Age.latitude	Full Model	Mean Crown Age ~ Prop. Range Size Sampled+Range Size+Latitude Mid.+Elevation+Tarsus Length+Hand Wing Index+Migratory Distance+Landscape Ruggedness	<0.001	0.355	323.468	0	0.092
Mean Crown Age.latitude	Prop. Range Size Sampled	Mean Crown Age ~ Range Size+Latitude Mid.+Elevation+Tarsus Length+Hand Wing Index+Migratory Distance+Landscape Ruggedness	<0.001	0.346	325.027	1.559	0.042
Mean Crown Age.latitude	Latitude Mid.	Mean Crown Age ~ Prop. Range Size Sampled+Range Size+Elevation+Tarsus Length+Hand Wing Index+Migratory Distance+Landscape Ruggedness	<0.001	0.224	351.704	28.236	0
Mean Crown Age.latitude	Range Size	Mean Crown Age ~ Prop. Range Size Sampled+Latitude Mid.+Elevation+Tarsus Length+Hand Wing Index+Migratory Distance+Landscape Ruggedness	<0.001	0.161	374.147	50.679	0
Mean Crown Age.climate.breadth	RANGE.bio4	Mean Crown Age ~ Prop. Range Size Sampled+Range Size+Annual Temp. Range+Annual Precip.+Precip. Seasonality+Elevational Range+Tarsus Length+Hand Wing Index+Migratory Distance+Landscape Ruggedness	<0.001	0.345	328.524	-2.252	0.165
Mean Crown Age.climate.breadth	RANGE.bio1	Mean Crown Age ~ Prop. Range Size Sampled+Range Size+Temp. Seasonality Range+Annual Precip.+Precip. Seasonality+Elevational Range+Tarsus Length+Hand Wing Index+Migratory Distance+Landscape Ruggedness	<0.001	0.345	328.585	-2.191	0.16
Mean Crown Age.climate.breadth	Elevation	Mean Crown Age ~ Prop. Range Size Sampled+Range Size+Annual Temp. Range+Temp. Seasonality Range+Annual Precip.+Precip. Seasonality+Tarsus Length+Hand Wing Index+Migratory Distance+Landscape Ruggedness	<0.001	0.345	328.602	-2.174	0.159
Mean Crown Age.climate.breadth	Migratory Distance	Mean Crown Age ~ Prop. Range Size Sampled+Range Size+Annual Temp. Range+Temp. Seasonality Range+Annual Precip.+Precip. Seasonality+Elevational Range+Tarsus Length+Hand Wing Index+Landscape Ruggedness	<0.001	0.345	328.604	-2.172	0.159
Mean Crown Age.climate.breadth	Tarsus Length	Mean Crown Age ~ Prop. Range Size Sampled+Range Size+Annual Temp. Range+Temp. Seasonality Range+Annual Precip.+Precip. Seasonality+Elevational Range+Hand Wing Index+Migratory Distance+Landscape Ruggedness	<0.001	0.344	329.37	-1.406	0.108
Mean Crown Age.climate.breadth	RANGE.bio15	Mean Crown Age ~ Prop. Range Size Sampled+Range Size+Annual Temp. Range+Temp. Seasonality Range+Annual Precip.+Elevational Range+Tarsus Length+Hand Wing Index+Migratory Distance+Landscape Ruggedness	<0.001	0.347	329.591	-1.185	0.097
Mean Crown Age.climate.breadth	Landscape Ruggedness	Mean Crown Age ~ Prop. Range Size Sampled+Range Size+Annual Temp. Range+Temp. Seasonality Range+Annual Precip.+Precip. Seasonality+Elevational Range+Tarsus Length+Hand Wing Index+Migratory Distance	<0.001	0.337	330.765	-0.011	0.054
Mean Crown Age.climate.breadth	Full Model	Mean Crown Age ~ Prop. Range Size Sampled+Range Size+Annual Temp. Range+Temp. Seasonality Range+Annual Precip.+Precip. Seasonality+Elevational Range+Tarsus Length+Hand Wing Index+Migratory Distance+Landscape Ruggedness	<0.001	0.342	330.776	0	0.054
Mean Crown Age.climate.breadth	Hand Wing Index	Mean Crown Age ~ Prop. Range Size Sampled+Range Size+Annual Temp. Range+Temp. Seasonality Range+Annual Precip.+Precip. Seasonality+Elevational Range+Tarsus Length+Migratory Distance+Landscape Ruggedness	<0.001	0.327	331.675	0.899	0.034
Mean Crown Age.climate.breadth	Prop. Range Size Sampled	Mean Crown Age ~ Range Size+Annual Temp. Range+Temp. Seasonality Range+Annual Precip.+Precip. Seasonality+Elevational Range+Tarsus Length+Hand Wing Index+Migratory Distance+Landscape Ruggedness	<0.001	0.329	334.324	3.548	0.009
Mean Crown Age.climate.breadth	RANGE.bio12	Mean Crown Age ~ Prop. Range Size Sampled+Range Size+Annual Temp. Range+Temp. Seasonality Range+Precip. Seasonality+Elevational Range+Tarsus Length+Hand Wing Index+Migratory Distance+Landscape Ruggedness	<0.001	0.24	356.122	25.346	0
Mean Crown Age.climate.breadth	Range Size	Mean Crown Age ~ Prop. Range Size Sampled+Annual Temp. Range+Temp. Seasonality Range+Annual Precip.+Precip. Seasonality+Elevational Range+Tarsus Length+Hand Wing Index+Migratory Distance+Landscape Ruggedness	<0.001	0.219	356.473	25.697	0
Mean Crown Age.NPP	Migratory Distance	Mean Crown Age ~ Prop. Range Size Sampled+Range Size+NPP+Elevation+Tarsus Length+Hand Wing Index+Landscape Ruggedness	<0.001	0.337	327.537	-2.176	0.311
Mean Crown Age.NPP	Tarsus Length	Mean Crown Age ~ Prop. Range Size Sampled+Range Size+NPP+Elevation+Hand Wing Index+Migratory Distance+Landscape Ruggedness	<0.001	0.337	328.206	-1.507	0.222
Mean Crown Age.NPP	Hand Wing Index	Mean Crown Age ~ Prop. Range Size Sampled+Range Size+NPP+Elevation+Tarsus Length+Migratory Distance+Landscape Ruggedness	<0.001	0.329	329.012	-0.701	0.149
Mean Crown Age.NPP	Landscape Ruggedness	Mean Crown Age ~ Prop. Range Size Sampled+Range Size+NPP+Elevation+Tarsus Length+Hand Wing Index+Migratory Distance	<0.001	0.33	329.22	-0.493	0.134
Mean Crown Age.NPP	Full Model	Mean Crown Age ~ Prop. Range Size Sampled+Range Size+NPP+Elevation+Tarsus Length+Hand Wing Index+Migratory Distance+Landscape Ruggedness	<0.001	0.334	329.713	0	0.105
Mean Crown Age.NPP	Elevation	Mean Crown Age ~ Prop. Range Size Sampled+Range Size+NPP+Tarsus Length+Hand Wing Index+Migratory Distance+Landscape Ruggedness	<0.001	0.328	330.435	0.722	0.073
Mean Crown Age.NPP	Prop. Range Size Sampled	Mean Crown Age ~ Range Size+NPP+Elevation+Tarsus Length+Hand Wing Index+Migratory Distance+Landscape Ruggedness	<0.001	0.31	335.382	5.669	0.006
Mean Crown Age.NPP	NPP	Mean Crown Age ~ Prop. Range Size Sampled+Range Size+Elevation+Tarsus Length+Hand Wing Index+Migratory Distance+Landscape Ruggedness	<0.001	0.224	351.704	21.991	0
Mean Crown Age.NPP	Range Size	Mean Crown Age ~ Prop. Range Size Sampled+NPP+Elevation+Tarsus Length+Hand Wing Index+Migratory Distance+Landscape Ruggedness	<0.001	0.172	370.91	41.198	0
Mean Crown Age.pc1	Tarsus Length	Mean Crown Age ~ Prop. Range Size Sampled+Range Size+Bioclim PC1+Elevation+Hand Wing Index+Migratory Distance+Landscape Ruggedness	<0.001	0.343	325.7	-1.809	0.317
Mean Crown Age.pc1	Migratory Distance	Mean Crown Age ~ Prop. Range Size Sampled+Range Size+Bioclim PC1+Elevation+Tarsus Length+Hand Wing Index+Landscape Ruggedness	<0.001	0.34	325.949	-1.56	0.28
Mean Crown Age.pc1	Hand Wing Index	Mean Crown Age ~ Prop. Range Size Sampled+Range Size+Bioclim PC1+Elevation+Tarsus Length+Migratory Distance+Landscape Ruggedness	<0.001	0.336	327.011	-0.498	0.165
Mean Crown Age.pc1	Full Model	Mean Crown Age ~ Prop. Range Size Sampled+Range Size+Bioclim PC1+Elevation+Tarsus Length+Hand Wing Index+Migratory Distance+Landscape Ruggedness	<0.001	0.34	327.509	0	0.128
Mean Crown Age.pc1	Landscape Ruggedness	Mean Crown Age ~ Prop. Range Size Sampled+Range Size+Bioclim PC1+Elevation+Tarsus Length+Hand Wing Index+Migratory Distance	<0.001	0.332	328.244	0.735	0.089
Mean Crown Age.pc1	Prop. Range Size Sampled	Mean Crown Age ~ Range Size+Bioclim PC1+Elevation+Tarsus Length+Hand Wing Index+Migratory Distance+Landscape Ruggedness	<0.001	0.321	331.819	4.31	0.015
Mean Crown Age.pc1	Elevation	Mean Crown Age ~ Prop. Range Size Sampled+Range Size+Bioclim PC1+Tarsus Length+Hand Wing Index+Migratory Distance+Landscape Ruggedness	<0.001	0.314	333.727	6.218	0.006
Mean Crown Age.pc1	Bioclim PC1	Mean Crown Age ~ Prop. Range Size Sampled+Range Size+Elevation+Tarsus Length+Hand Wing Index+Migratory Distance+Landscape Ruggedness	<0.001	0.224	351.704	24.194	0
Mean Crown Age.pc1	Range Size	Mean Crown Age ~ Prop. Range Size Sampled+Bioclim PC1+Elevation+Tarsus Length+Hand Wing Index+Migratory Distance+Landscape Ruggedness	<0.001	0.112	384.538	57.029	0
crown.rate.climate.breadth	RANGE.bio15	Crown Splitting Rate (0.9) ~ Prop. Range Size Sampled+Range Size+Annual Temp. Range+Temp. Seasonality Range+Annual Precip.+Elevational Range+Tarsus Length+Hand Wing Index+Migratory Distance+Landscape Ruggedness	0.122	0.026	252.551	-2.235	0.137
crown.rate.climate.breadth	Hand Wing Index	Crown Splitting Rate (0.9) ~ Prop. Range Size Sampled+Range Size+Annual Temp. Range+Temp. Seasonality Range+Annual Precip.+Precip. Seasonality+Elevational Range+Tarsus Length+Migratory Distance+Landscape Ruggedness	0.124	0.026	252.58	-2.206	0.135
crown.rate.climate.breadth	RANGE.bio4	Crown Splitting Rate (0.9) ~ Prop. Range Size Sampled+Range Size+Annual Temp. Range+Annual Precip.+Precip. Seasonality+Elevational Range+Tarsus Length+Hand Wing Index+Migratory Distance+Landscape Ruggedness	0.126	0.025	252.642	-2.144	0.131
crown.rate.climate.breadth	Migratory Distance	Crown Splitting Rate (0.9) ~ Prop. Range Size Sampled+Range Size+Annual Temp. Range+Temp. Seasonality Range+Annual Precip.+Precip. Seasonality+Elevational Range+Tarsus Length+Hand Wing Index+Landscape Ruggedness	0.135	0.024	252.904	-1.882	0.115
crown.rate.climate.breadth	Landscape Ruggedness	Crown Splitting Rate (0.9) ~ Prop. Range Size Sampled+Range Size+Annual Temp. Range+Temp. Seasonality Range+Annual Precip.+Precip. Seasonality+Elevational Range+Tarsus Length+Hand Wing Index+Migratory Distance	0.135	0.024	252.936	-1.85	0.113
crown.rate.climate.breadth	Range Size	Crown Splitting Rate (0.9) ~ Prop. Range Size Sampled+Annual Temp. Range+Temp. Seasonality Range+Annual Precip.+Precip. Seasonality+Elevational Range+Tarsus Length+Hand Wing Index+Migratory Distance+Landscape Ruggedness	0.148	0.023	253.253	-1.533	0.096
crown.rate.climate.breadth	RANGE.bio12	Crown Splitting Rate (0.9) ~ Prop. Range Size Sampled+Range Size+Annual Temp. Range+Temp. Seasonality Range+Precip. Seasonality+Elevational Range+Tarsus Length+Hand Wing Index+Migratory Distance+Landscape Ruggedness	0.157	0.022	253.491	-1.295	0.086
crown.rate.climate.breadth	Elevation	Crown Splitting Rate (0.9) ~ Prop. Range Size Sampled+Range Size+Annual Temp. Range+Temp. Seasonality Range+Annual Precip.+Precip. Seasonality+Tarsus Length+Hand Wing Index+Migratory Distance+Landscape Ruggedness	0.171	0.02	253.798	-0.988	0.073
crown.rate.climate.breadth	Full Model	Crown Splitting Rate (0.9) ~ Prop. Range Size Sampled+Range Size+Annual Temp. Range+Temp. Seasonality Range+Annual Precip.+Precip. Seasonality+Elevational Range+Tarsus Length+Hand Wing Index+Migratory Distance+Landscape Ruggedness	0.171	0.021	254.786	0	0.045
crown.rate.climate.breadth	RANGE.bio1	Crown Splitting Rate (0.9) ~ Prop. Range Size Sampled+Range Size+Temp. Seasonality Range+Annual Precip.+Precip. Seasonality+Elevational Range+Tarsus Length+Hand Wing Index+Migratory Distance+Landscape Ruggedness	0.234	0.014	255.068	0.282	0.039
crown.rate.climate.breadth	Tarsus Length	Crown Splitting Rate (0.9) ~ Prop. Range Size Sampled+Range Size+Annual Temp. Range+Temp. Seasonality Range+Annual Precip.+Precip. Seasonality+Elevational Range+Hand Wing Index+Migratory Distance+Landscape Ruggedness	0.274	0.011	255.812	1.026	0.027
crown.rate.climate.breadth	Prop. Range Size Sampled	Crown Splitting Rate (0.9) ~ Range Size+Annual Temp. Range+Temp. Seasonality Range+Annual Precip.+Precip. Seasonality+Elevational Range+Tarsus Length+Hand Wing Index+Migratory Distance+Landscape Ruggedness	0.608	-0.009	260.065	5.279	0.003
crown.rate.climate.stability	Landscape Ruggedness	Crown Splitting Rate (0.9) ~ Prop. Range Size Sampled+Range Size+CS Annual Temp.+CS Temp. Seasonality+CS Annual Precip.+CS Precip. Seasonality+Elevation+Tarsus Length+Hand Wing Index+Migratory Distance	0.092	0.031	252.055	-2.241	0.135
crown.rate.climate.stability	Hand Wing Index	Crown Splitting Rate (0.9) ~ Prop. Range Size Sampled+Range Size+CS Annual Temp.+CS Temp. Seasonality+CS Annual Precip.+CS Precip. Seasonality+Elevation+Tarsus Length+Migratory Distance+Landscape Ruggedness	0.09	0.031	252.061	-2.235	0.135
crown.rate.climate.stability	CS_bio_15	Crown Splitting Rate (0.9) ~ Prop. Range Size Sampled+Range Size+CS Annual Temp.+CS Temp. Seasonality+CS Annual Precip.+Elevation+Tarsus Length+Hand Wing Index+Migratory Distance+Landscape Ruggedness	0.095	0.03	252.076	-2.22	0.134
crown.rate.climate.stability	CS_bio_12	Crown Splitting Rate (0.9) ~ Prop. Range Size Sampled+Range Size+CS Annual Temp.+CS Temp. Seasonality+CS Precip. Seasonality+Elevation+Tarsus Length+Hand Wing Index+Migratory Distance+Landscape Ruggedness	0.096	0.03	252.125	-2.171	0.13
crown.rate.climate.stability	Migratory Distance	Crown Splitting Rate (0.9) ~ Prop. Range Size Sampled+Range Size+CS Annual Temp.+CS Temp. Seasonality+CS Annual Precip.+CS Precip. Seasonality+Elevation+Tarsus Length+Hand Wing Index+Landscape Ruggedness	0.073	0.035	252.514	-1.783	0.107
crown.rate.climate.stability	CS_bio_04	Crown Splitting Rate (0.9) ~ Prop. Range Size Sampled+Range Size+CS Annual Temp.+CS Annual Precip.+CS Precip. Seasonality+Elevation+Tarsus Length+Hand Wing Index+Migratory Distance+Landscape Ruggedness	0.11	0.028	252.559	-1.737	0.105
crown.rate.climate.stability	CS_bio_01	Crown Splitting Rate (0.9) ~ Prop. Range Size Sampled+Range Size+CS Temp. Seasonality+CS Annual Precip.+CS Precip. Seasonality+Elevation+Tarsus Length+Hand Wing Index+Migratory Distance+Landscape Ruggedness	0.14	0.024	253.321	-0.975	0.072
crown.rate.climate.stability	Elevation	Crown Splitting Rate (0.9) ~ Prop. Range Size Sampled+Range Size+CS Annual Temp.+CS Temp. Seasonality+CS Annual Precip.+CS Precip. Seasonality+Tarsus Length+Hand Wing Index+Migratory Distance+Landscape Ruggedness	0.16	0.021	253.832	-0.465	0.056
crown.rate.climate.stability	Tarsus Length	Crown Splitting Rate (0.9) ~ Prop. Range Size Sampled+Range Size+CS Annual Temp.+CS Temp. Seasonality+CS Annual Precip.+CS Precip. Seasonality+Elevation+Hand Wing Index+Migratory Distance+Landscape Ruggedness	0.112	0.028	254.03	-0.267	0.05
crown.rate.climate.stability	Full Model	Crown Splitting Rate (0.9) ~ Prop. Range Size Sampled+Range Size+CS Annual Temp.+CS Temp. Seasonality+CS Annual Precip.+CS Precip. Seasonality+Elevation+Tarsus Length+Hand Wing Index+Migratory Distance+Landscape Ruggedness	0.133	0.026	254.296	0	0.044
crown.rate.climate.stability	Range Size	Crown Splitting Rate (0.9) ~ Prop. Range Size Sampled+CS Annual Temp.+CS Temp. Seasonality+CS Annual Precip.+CS Precip. Seasonality+Elevation+Tarsus Length+Hand Wing Index+Migratory Distance+Landscape Ruggedness	0.148	0.023	255.092	0.796	0.03
crown.rate.climate.stability	Prop. Range Size Sampled	Crown Splitting Rate (0.9) ~ Range Size+CS Annual Temp.+CS Temp. Seasonality+CS Annual Precip.+CS Precip. Seasonality+Elevation+Tarsus Length+Hand Wing Index+Migratory Distance+Landscape Ruggedness	0.558	-0.006	259.483	5.187	0.003
crown.rate.lat	Migratory Distance	Crown Splitting Rate (0.9) ~ Prop. Range Size Sampled+Range Size+Latitude Mid.+Elevation+Tarsus Length+Hand Wing Index+Landscape Ruggedness	0.04	0.037	246.958	-2.15	0.2
crown.rate.lat	Hand Wing Index	Crown Splitting Rate (0.9) ~ Prop. Range Size Sampled+Range Size+Latitude Mid.+Elevation+Tarsus Length+Migratory Distance+Landscape Ruggedness	0.04	0.037	246.958	-2.149	0.2
crown.rate.lat	Landscape Ruggedness	Crown Splitting Rate (0.9) ~ Prop. Range Size Sampled+Range Size+Latitude Mid.+Elevation+Tarsus Length+Hand Wing Index+Migratory Distance	0.043	0.036	247.037	-2.071	0.192
crown.rate.lat	Latitude Mid.	Crown Splitting Rate (0.9) ~ Prop. Range Size Sampled+Range Size+Elevation+Tarsus Length+Hand Wing Index+Migratory Distance+Landscape Ruggedness	0.066	0.03	248.188	-0.919	0.108
crown.rate.lat	Tarsus Length	Crown Splitting Rate (0.9) ~ Prop. Range Size Sampled+Range Size+Latitude Mid.+Elevation+Hand Wing Index+Migratory Distance+Landscape Ruggedness	0.076	0.028	248.804	-0.304	0.079
crown.rate.lat	Elevation	Crown Splitting Rate (0.9) ~ Prop. Range Size Sampled+Range Size+Latitude Mid.+Tarsus Length+Hand Wing Index+Migratory Distance+Landscape Ruggedness	0.081	0.028	248.842	-0.266	0.078
crown.rate.lat	Full Model	Crown Splitting Rate (0.9) ~ Prop. Range Size Sampled+Range Size+Latitude Mid.+Elevation+Tarsus Length+Hand Wing Index+Migratory Distance+Landscape Ruggedness	0.067	0.032	249.108	0	0.068
crown.rate.lat	Range Size	Crown Splitting Rate (0.9) ~ Prop. Range Size Sampled+Latitude Mid.+Elevation+Tarsus Length+Hand Wing Index+Migratory Distance+Landscape Ruggedness	0.079	0.028	249.144	0.036	0.067
crown.rate.lat	Prop. Range Size Sampled	Crown Splitting Rate (0.9) ~ Range Size+Latitude Mid.+Elevation+Tarsus Length+Hand Wing Index+Migratory Distance+Landscape Ruggedness	0.338	0.005	253.693	4.585	0.007
crown.rate.NPP	Hand Wing Index	Crown Splitting Rate (0.9) ~ Prop. Range Size Sampled+Range Size+NPP+Elevation+Tarsus Length+Migratory Distance+Landscape Ruggedness	0.019	0.047	246.296	-2.159	0.206
crown.rate.NPP	Migratory Distance	Crown Splitting Rate (0.9) ~ Prop. Range Size Sampled+Range Size+NPP+Elevation+Tarsus Length+Hand Wing Index+Landscape Ruggedness	0.02	0.047	246.415	-2.04	0.194
crown.rate.NPP	Landscape Ruggedness	Crown Splitting Rate (0.9) ~ Prop. Range Size Sampled+Range Size+NPP+Elevation+Tarsus Length+Hand Wing Index+Migratory Distance	0.02	0.046	246.47	-1.986	0.189
crown.rate.NPP	Range Size	Crown Splitting Rate (0.9) ~ Prop. Range Size Sampled+NPP+Elevation+Tarsus Length+Hand Wing Index+Migratory Distance+Landscape Ruggedness	0.03	0.041	247.602	-0.853	0.107
crown.rate.NPP	NPP	Crown Splitting Rate (0.9) ~ Prop. Range Size Sampled+Range Size+Elevation+Tarsus Length+Hand Wing Index+Migratory Distance+Landscape Ruggedness	0.068	0.03	247.956	-0.5	0.09
crown.rate.NPP	Elevation	Crown Splitting Rate (0.9) ~ Prop. Range Size Sampled+Range Size+NPP+Tarsus Length+Hand Wing Index+Migratory Distance+Landscape Ruggedness	0.076	0.029	248.393	-0.062	0.072
crown.rate.NPP	Full Model	Crown Splitting Rate (0.9) ~ Prop. Range Size Sampled+Range Size+NPP+Elevation+Tarsus Length+Hand Wing Index+Migratory Distance+Landscape Ruggedness	0.032	0.043	248.455	0	0.07
crown.rate.NPP	Tarsus Length	Crown Splitting Rate (0.9) ~ Prop. Range Size Sampled+Range Size+NPP+Elevation+Hand Wing Index+Migratory Distance+Landscape Ruggedness	0.041	0.037	248.512	0.057	0.068
crown.rate.NPP	Prop. Range Size Sampled	Crown Splitting Rate (0.9) ~ Range Size+NPP+Elevation+Tarsus Length+Hand Wing Index+Migratory Distance+Landscape Ruggedness	0.399	0.002	254.027	5.572	0.004
crown.rate.pc1	Hand Wing Index	Crown Splitting Rate (0.9) ~ Prop. Range Size Sampled+Range Size+Bioclim PC1+Elevation+Tarsus Length+Migratory Distance+Landscape Ruggedness	0.048	0.035	247.531	-2.153	0.198
crown.rate.pc1	Landscape Ruggedness	Crown Splitting Rate (0.9) ~ Prop. Range Size Sampled+Range Size+Bioclim PC1+Elevation+Tarsus Length+Hand Wing Index+Migratory Distance	0.05	0.034	247.552	-2.132	0.196
crown.rate.pc1	Migratory Distance	Crown Splitting Rate (0.9) ~ Prop. Range Size Sampled+Range Size+Bioclim PC1+Elevation+Tarsus Length+Hand Wing Index+Landscape Ruggedness	0.05	0.034	247.577	-2.107	0.194
crown.rate.pc1	Bioclim PC1	Crown Splitting Rate (0.9) ~ Prop. Range Size Sampled+Range Size+Elevation+Tarsus Length+Hand Wing Index+Migratory Distance+Landscape Ruggedness	0.065	0.031	248.23	-1.454	0.14
crown.rate.pc1	Tarsus Length	Crown Splitting Rate (0.9) ~ Prop. Range Size Sampled+Range Size+Bioclim PC1+Elevation+Hand Wing Index+Migratory Distance+Landscape Ruggedness	0.087	0.027	249.246	-0.438	0.084
crown.rate.pc1	Full Model	Crown Splitting Rate (0.9) ~ Prop. Range Size Sampled+Range Size+Bioclim PC1+Elevation+Tarsus Length+Hand Wing Index+Migratory Distance+Landscape Ruggedness	0.079	0.03	249.684	0	0.067
crown.rate.pc1	Elevation	Crown Splitting Rate (0.9) ~ Prop. Range Size Sampled+Range Size+Bioclim PC1+Tarsus Length+Hand Wing Index+Migratory Distance+Landscape Ruggedness	0.114	0.023	249.973	0.289	0.058
crown.rate.pc1	Range Size	Crown Splitting Rate (0.9) ~ Prop. Range Size Sampled+Bioclim PC1+Elevation+Tarsus Length+Hand Wing Index+Migratory Distance+Landscape Ruggedness	0.107	0.024	249.991	0.308	0.058
crown.rate.pc1	Prop. Range Size Sampled	Crown Splitting Rate (0.9) ~ Range Size+Bioclim PC1+Elevation+Tarsus Length+Hand Wing Index+Migratory Distance+Landscape Ruggedness	0.448	-0.001	254.884	5.201	0.005
phylog.struct.crown.climate.breadth	Elevation	Phylogeographic Structure (0.9) ~ Mean Crown Age+Prop. Range Size Sampled+Range Size+Annual Temp. Range+Temp. Seasonality Range+Annual Precip.+Precip. Seasonality+Tarsus Length+Hand Wing Index+Migratory Distance+Landscape Ruggedness	<0.001	0.355	316.516	-2.266	0.13
phylog.struct.crown.climate.breadth	Hand Wing Index	Phylogeographic Structure (0.9) ~ Mean Crown Age+Prop. Range Size Sampled+Range Size+Annual Temp. Range+Temp. Seasonality Range+Annual Precip.+Precip. Seasonality+Elevational Range+Tarsus Length+Migratory Distance+Landscape Ruggedness	<0.001	0.355	316.588	-2.194	0.125
phylog.struct.crown.climate.breadth	Migratory Distance	Phylogeographic Structure (0.9) ~ Mean Crown Age+Prop. Range Size Sampled+Range Size+Annual Temp. Range+Temp. Seasonality Range+Annual Precip.+Precip. Seasonality+Elevational Range+Tarsus Length+Hand Wing Index+Landscape Ruggedness	<0.001	0.355	316.639	-2.143	0.122
phylog.struct.crown.climate.breadth	Tarsus Length	Phylogeographic Structure (0.9) ~ Mean Crown Age+Prop. Range Size Sampled+Range Size+Annual Temp. Range+Temp. Seasonality Range+Annual Precip.+Precip. Seasonality+Elevational Range+Hand Wing Index+Migratory Distance+Landscape Ruggedness	<0.001	0.355	316.652	-2.129	0.121
phylog.struct.crown.climate.breadth	RANGE.bio4	Phylogeographic Structure (0.9) ~ Mean Crown Age+Prop. Range Size Sampled+Range Size+Annual Temp. Range+Annual Precip.+Precip. Seasonality+Elevational Range+Tarsus Length+Hand Wing Index+Migratory Distance+Landscape Ruggedness	<0.001	0.353	317.255	-1.527	0.089
phylog.struct.crown.climate.breadth	Landscape Ruggedness	Phylogeographic Structure (0.9) ~ Mean Crown Age+Prop. Range Size Sampled+Range Size+Annual Temp. Range+Temp. Seasonality Range+Annual Precip.+Precip. Seasonality+Elevational Range+Tarsus Length+Hand Wing Index+Migratory Distance	<0.001	0.353	317.28	-1.501	0.088
phylog.struct.crown.climate.breadth	RANGE.bio15	Phylogeographic Structure (0.9) ~ Mean Crown Age+Prop. Range Size Sampled+Range Size+Annual Temp. Range+Temp. Seasonality Range+Annual Precip.+Elevational Range+Tarsus Length+Hand Wing Index+Migratory Distance+Landscape Ruggedness	<0.001	0.353	317.459	-1.322	0.081
phylog.struct.crown.climate.breadth	RANGE.bio12	Phylogeographic Structure (0.9) ~ Mean Crown Age+Prop. Range Size Sampled+Range Size+Annual Temp. Range+Temp. Seasonality Range+Precip. Seasonality+Elevational Range+Tarsus Length+Hand Wing Index+Migratory Distance+Landscape Ruggedness	<0.001	0.352	317.777	-1.004	0.069
phylog.struct.crown.climate.breadth	Range Size	Phylogeographic Structure (0.9) ~ Mean Crown Age+Prop. Range Size Sampled+Annual Temp. Range+Temp. Seasonality Range+Annual Precip.+Precip. Seasonality+Elevational Range+Tarsus Length+Hand Wing Index+Migratory Distance+Landscape Ruggedness	<0.001	0.351	317.877	-0.904	0.066
phylog.struct.crown.climate.breadth	RANGE.bio1	Phylogeographic Structure (0.9) ~ Mean Crown Age+Prop. Range Size Sampled+Range Size+Temp. Seasonality Range+Annual Precip.+Precip. Seasonality+Elevational Range+Tarsus Length+Hand Wing Index+Migratory Distance+Landscape Ruggedness	<0.001	0.351	317.94	-0.841	0.064
phylog.struct.crown.climate.breadth	Full Model	Phylogeographic Structure (0.9) ~ Mean Crown Age+Prop. Range Size Sampled+Range Size+Annual Temp. Range+Temp. Seasonality Range+Annual Precip.+Precip. Seasonality+Elevational Range+Tarsus Length+Hand Wing Index+Migratory Distance+Landscape Ruggedness	<0.001	0.352	318.782	0	0.042
phylog.struct.crown.climate.breadth	Prop. Range Size Sampled	Phylogeographic Structure (0.9) ~ Mean Crown Age+Range Size+Annual Temp. Range+Temp. Seasonality Range+Annual Precip.+Precip. Seasonality+Elevational Range+Tarsus Length+Hand Wing Index+Migratory Distance+Landscape Ruggedness	<0.001	0.334	323.24	4.458	0.004
phylog.struct.crown.climate.breadth	Age	Phylogeographic Structure (0.9) ~ Prop. Range Size Sampled+Range Size+Annual Temp. Range+Temp. Seasonality Range+Annual Precip.+Precip. Seasonality+Elevational Range+Tarsus Length+Hand Wing Index+Migratory Distance+Landscape Ruggedness	<0.001	0.202	361.132	42.35	0
phylog.struct.crown.climate.stability	CS_bio_15	Phylogeographic Structure (0.9) ~ Mean Crown Age+Prop. Range Size Sampled+Range Size+CS Annual Temp.+CS Temp. Seasonality+CS Annual Precip.+Elevation+Tarsus Length+Hand Wing Index+Migratory Distance+Landscape Ruggedness	<0.001	0.353	317.369	-2.274	0.133
phylog.struct.crown.climate.stability	Landscape Ruggedness	Phylogeographic Structure (0.9) ~ Mean Crown Age+Prop. Range Size Sampled+Range Size+CS Annual Temp.+CS Temp. Seasonality+CS Annual Precip.+CS Precip. Seasonality+Elevation+Tarsus Length+Hand Wing Index+Migratory Distance	<0.001	0.353	317.381	-2.262	0.132
phylog.struct.crown.climate.stability	Migratory Distance	Phylogeographic Structure (0.9) ~ Mean Crown Age+Prop. Range Size Sampled+Range Size+CS Annual Temp.+CS Temp. Seasonality+CS Annual Precip.+CS Precip. Seasonality+Elevation+Tarsus Length+Hand Wing Index+Landscape Ruggedness	<0.001	0.353	317.405	-2.238	0.13
phylog.struct.crown.climate.stability	Tarsus Length	Phylogeographic Structure (0.9) ~ Mean Crown Age+Prop. Range Size Sampled+Range Size+CS Annual Temp.+CS Temp. Seasonality+CS Annual Precip.+CS Precip. Seasonality+Elevation+Hand Wing Index+Migratory Distance+Landscape Ruggedness	<0.001	0.353	317.405	-2.238	0.13
phylog.struct.crown.climate.stability	Hand Wing Index	Phylogeographic Structure (0.9) ~ Mean Crown Age+Prop. Range Size Sampled+Range Size+CS Annual Temp.+CS Temp. Seasonality+CS Annual Precip.+CS Precip. Seasonality+Elevation+Tarsus Length+Migratory Distance+Landscape Ruggedness	<0.001	0.352	317.698	-1.945	0.113
phylog.struct.crown.climate.stability	CS_bio_12	Phylogeographic Structure (0.9) ~ Mean Crown Age+Prop. Range Size Sampled+Range Size+CS Annual Temp.+CS Temp. Seasonality+CS Precip. Seasonality+Elevation+Tarsus Length+Hand Wing Index+Migratory Distance+Landscape Ruggedness	<0.001	0.352	317.718	-1.925	0.111
phylog.struct.crown.climate.stability	CS_bio_01	Phylogeographic Structure (0.9) ~ Mean Crown Age+Prop. Range Size Sampled+Range Size+CS Temp. Seasonality+CS Annual Precip.+CS Precip. Seasonality+Elevation+Tarsus Length+Hand Wing Index+Migratory Distance+Landscape Ruggedness	<0.001	0.35	318.134	-1.509	0.09
phylog.struct.crown.climate.stability	Elevation	Phylogeographic Structure (0.9) ~ Mean Crown Age+Prop. Range Size Sampled+Range Size+CS Annual Temp.+CS Temp. Seasonality+CS Annual Precip.+CS Precip. Seasonality+Tarsus Length+Hand Wing Index+Migratory Distance+Landscape Ruggedness	<0.001	0.347	319.144	-0.499	0.055
phylog.struct.crown.climate.stability	Full Model	Phylogeographic Structure (0.9) ~ Mean Crown Age+Prop. Range Size Sampled+Range Size+CS Annual Temp.+CS Temp. Seasonality+CS Annual Precip.+CS Precip. Seasonality+Elevation+Tarsus Length+Hand Wing Index+Migratory Distance+Landscape Ruggedness	<0.001	0.35	319.643	0	0.043
phylog.struct.crown.climate.stability	CS_bio_04	Phylogeographic Structure (0.9) ~ Mean Crown Age+Prop. Range Size Sampled+Range Size+CS Annual Temp.+CS Annual Precip.+CS Precip. Seasonality+Elevation+Tarsus Length+Hand Wing Index+Migratory Distance+Landscape Ruggedness	<0.001	0.344	320.117	0.474	0.034
phylog.struct.crown.climate.stability	Range Size	Phylogeographic Structure (0.9) ~ Mean Crown Age+Prop. Range Size Sampled+CS Annual Temp.+CS Temp. Seasonality+CS Annual Precip.+CS Precip. Seasonality+Elevation+Tarsus Length+Hand Wing Index+Migratory Distance+Landscape Ruggedness	<0.001	0.343	320.615	0.973	0.026
phylog.struct.crown.climate.stability	Prop. Range Size Sampled	Phylogeographic Structure (0.9) ~ Mean Crown Age+Range Size+CS Annual Temp.+CS Temp. Seasonality+CS Annual Precip.+CS Precip. Seasonality+Elevation+Tarsus Length+Hand Wing Index+Migratory Distance+Landscape Ruggedness	<0.001	0.33	324.498	4.855	0.004
phylog.struct.crown.climate.stability	Age	Phylogeographic Structure (0.9) ~ Prop. Range Size Sampled+Range Size+CS Annual Temp.+CS Temp. Seasonality+CS Annual Precip.+CS Precip. Seasonality+Elevation+Tarsus Length+Hand Wing Index+Migratory Distance+Landscape Ruggedness	<0.001	0.203	360.845	41.202	0
phylog.struct.crown.lat	Tarsus Length	Phylogeographic Structure (0.9) ~ Mean Crown Age+Prop. Range Size Sampled+Range Size+Latitude Mid.+Elevation+Hand Wing Index+Migratory Distance+Landscape Ruggedness	<0.001	0.363	310.626	-2.185	0.194
phylog.struct.crown.lat	Landscape Ruggedness	Phylogeographic Structure (0.9) ~ Mean Crown Age+Prop. Range Size Sampled+Range Size+Latitude Mid.+Elevation+Tarsus Length+Hand Wing Index+Migratory Distance	<0.001	0.363	310.668	-2.144	0.19
phylog.struct.crown.lat	Hand Wing Index	Phylogeographic Structure (0.9) ~ Mean Crown Age+Prop. Range Size Sampled+Range Size+Latitude Mid.+Elevation+Tarsus Length+Migratory Distance+Landscape Ruggedness	<0.001	0.363	310.686	-2.125	0.188
phylog.struct.crown.lat	Migratory Distance	Phylogeographic Structure (0.9) ~ Mean Crown Age+Prop. Range Size Sampled+Range Size+Latitude Mid.+Elevation+Tarsus Length+Hand Wing Index+Landscape Ruggedness	<0.001	0.363	310.693	-2.118	0.188
phylog.struct.crown.lat	Elevation	Phylogeographic Structure (0.9) ~ Mean Crown Age+Prop. Range Size Sampled+Range Size+Latitude Mid.+Tarsus Length+Hand Wing Index+Migratory Distance+Landscape Ruggedness	<0.001	0.359	311.882	-0.929	0.104
phylog.struct.crown.lat	Full Model	Phylogeographic Structure (0.9) ~ Mean Crown Age+Prop. Range Size Sampled+Range Size+Latitude Mid.+Elevation+Tarsus Length+Hand Wing Index+Migratory Distance+Landscape Ruggedness	<0.001	0.36	312.811	0	0.065
phylog.struct.crown.lat	Range Size	Phylogeographic Structure (0.9) ~ Mean Crown Age+Prop. Range Size Sampled+Latitude Mid.+Elevation+Tarsus Length+Hand Wing Index+Migratory Distance+Landscape Ruggedness	<0.001	0.355	313.232	0.421	0.053
phylog.struct.crown.lat	Latitude Mid.	Phylogeographic Structure (0.9) ~ Mean Crown Age+Prop. Range Size Sampled+Range Size+Elevation+Tarsus Length+Hand Wing Index+Migratory Distance+Landscape Ruggedness	<0.001	0.345	316.484	3.672	0.01
phylog.struct.crown.lat	Prop. Range Size Sampled	Phylogeographic Structure (0.9) ~ Mean Crown Age+Range Size+Latitude Mid.+Elevation+Tarsus Length+Hand Wing Index+Migratory Distance+Landscape Ruggedness	<0.001	0.343	317.019	4.208	0.008
phylog.struct.crown.lat	Age	Phylogeographic Structure (0.9) ~ Prop. Range Size Sampled+Range Size+Latitude Mid.+Elevation+Tarsus Length+Hand Wing Index+Migratory Distance+Landscape Ruggedness	<0.001	0.219	353.187	40.376	0
phylog.struct.crown.NPP	Landscape Ruggedness	Phylogeographic Structure (0.9) ~ Mean Crown Age+Prop. Range Size Sampled+Range Size+NPP+Elevation+Tarsus Length+Hand Wing Index+Migratory Distance	<0.001	0.355	313.148	-2.187	0.189
phylog.struct.crown.NPP	Migratory Distance	Phylogeographic Structure (0.9) ~ Mean Crown Age+Prop. Range Size Sampled+Range Size+NPP+Elevation+Tarsus Length+Hand Wing Index+Landscape Ruggedness	<0.001	0.355	313.158	-2.177	0.188
phylog.struct.crown.NPP	Tarsus Length	Phylogeographic Structure (0.9) ~ Mean Crown Age+Prop. Range Size Sampled+Range Size+NPP+Elevation+Hand Wing Index+Migratory Distance+Landscape Ruggedness	<0.001	0.355	313.19	-2.144	0.185
phylog.struct.crown.NPP	Hand Wing Index	Phylogeographic Structure (0.9) ~ Mean Crown Age+Prop. Range Size Sampled+Range Size+NPP+Elevation+Tarsus Length+Migratory Distance+Landscape Ruggedness	<0.001	0.354	313.365	-1.97	0.17
phylog.struct.crown.NPP	Elevation	Phylogeographic Structure (0.9) ~ Mean Crown Age+Prop. Range Size Sampled+Range Size+NPP+Tarsus Length+Hand Wing Index+Migratory Distance+Landscape Ruggedness	<0.001	0.35	314.733	-0.602	0.086
phylog.struct.crown.NPP	Range Size	Phylogeographic Structure (0.9) ~ Mean Crown Age+Prop. Range Size Sampled+NPP+Elevation+Tarsus Length+Hand Wing Index+Migratory Distance+Landscape Ruggedness	<0.001	0.35	314.866	-0.469	0.08
phylog.struct.crown.NPP	Full Model	Phylogeographic Structure (0.9) ~ Mean Crown Age+Prop. Range Size Sampled+Range Size+NPP+Elevation+Tarsus Length+Hand Wing Index+Migratory Distance+Landscape Ruggedness	<0.001	0.352	315.335	0	0.063
phylog.struct.crown.NPP	NPP	Phylogeographic Structure (0.9) ~ Mean Crown Age+Prop. Range Size Sampled+Range Size+Elevation+Tarsus Length+Hand Wing Index+Migratory Distance+Landscape Ruggedness	<0.001	0.345	316.484	1.149	0.036
phylog.struct.crown.NPP	Prop. Range Size Sampled	Phylogeographic Structure (0.9) ~ Mean Crown Age+Range Size+NPP+Elevation+Tarsus Length+Hand Wing Index+Migratory Distance+Landscape Ruggedness	<0.001	0.331	320.923	5.588	0.004
phylog.struct.crown.NPP	Age	Phylogeographic Structure (0.9) ~ Prop. Range Size Sampled+Range Size+NPP+Elevation+Tarsus Length+Hand Wing Index+Migratory Distance+Landscape Ruggedness	<0.001	0.198	358.646	43.311	0
phylog.struct.crown.pc1	Landscape Ruggedness	Phylogeographic Structure (0.9) ~ Mean Crown Age+Prop. Range Size Sampled+Range Size+Bioclim PC1+Elevation+Tarsus Length+Hand Wing Index+Migratory Distance	<0.001	0.356	312.72	-2.206	0.206
phylog.struct.crown.pc1	Migratory Distance	Phylogeographic Structure (0.9) ~ Mean Crown Age+Prop. Range Size Sampled+Range Size+Bioclim PC1+Elevation+Tarsus Length+Hand Wing Index+Landscape Ruggedness	<0.001	0.356	312.729	-2.196	0.205
phylog.struct.crown.pc1	Tarsus Length	Phylogeographic Structure (0.9) ~ Mean Crown Age+Prop. Range Size Sampled+Range Size+Bioclim PC1+Elevation+Hand Wing Index+Migratory Distance+Landscape Ruggedness	<0.001	0.356	312.807	-2.119	0.197
phylog.struct.crown.pc1	Hand Wing Index	Phylogeographic Structure (0.9) ~ Mean Crown Age+Prop. Range Size Sampled+Range Size+Bioclim PC1+Elevation+Tarsus Length+Migratory Distance+Landscape Ruggedness	<0.001	0.356	312.907	-2.019	0.187
phylog.struct.crown.pc1	Full Model	Phylogeographic Structure (0.9) ~ Mean Crown Age+Prop. Range Size Sampled+Range Size+Bioclim PC1+Elevation+Tarsus Length+Hand Wing Index+Migratory Distance+Landscape Ruggedness	<0.001	0.353	314.926	0	0.068
phylog.struct.crown.pc1	Elevation	Phylogeographic Structure (0.9) ~ Mean Crown Age+Prop. Range Size Sampled+Range Size+Bioclim PC1+Tarsus Length+Hand Wing Index+Migratory Distance+Landscape Ruggedness	<0.001	0.348	315.514	0.588	0.051
phylog.struct.crown.pc1	Range Size	Phylogeographic Structure (0.9) ~ Mean Crown Age+Prop. Range Size Sampled+Bioclim PC1+Elevation+Tarsus Length+Hand Wing Index+Migratory Distance+Landscape Ruggedness	<0.001	0.347	315.575	0.649	0.049
phylog.struct.crown.pc1	Bioclim PC1	Phylogeographic Structure (0.9) ~ Mean Crown Age+Prop. Range Size Sampled+Range Size+Elevation+Tarsus Length+Hand Wing Index+Migratory Distance+Landscape Ruggedness	<0.001	0.345	316.484	1.558	0.031
phylog.struct.crown.pc1	Prop. Range Size Sampled	Phylogeographic Structure (0.9) ~ Mean Crown Age+Range Size+Bioclim PC1+Elevation+Tarsus Length+Hand Wing Index+Migratory Distance+Landscape Ruggedness	<0.001	0.333	320.053	5.127	0.005
phylog.struct.crown.pc1	Age	Phylogeographic Structure (0.9) ~ Prop. Range Size Sampled+Range Size+Bioclim PC1+Elevation+Tarsus Length+Hand Wing Index+Migratory Distance+Landscape Ruggedness	<0.001	0.201	357.765	42.839	0
phylog.struct.stem.climate.breadth	Elevation	Phylogeographic Structure (0.9) ~ Mean Stem Age+Prop. Range Size Sampled+Range Size+Annual Temp. Range+Temp. Seasonality Range+Annual Precip.+Precip. Seasonality+Tarsus Length+Hand Wing Index+Migratory Distance+Landscape Ruggedness	<0.001	0.254	346.946	-2.013	0.145
phylog.struct.stem.climate.breadth	Hand Wing Index	Phylogeographic Structure (0.9) ~ Mean Stem Age+Prop. Range Size Sampled+Range Size+Annual Temp. Range+Temp. Seasonality Range+Annual Precip.+Precip. Seasonality+Elevational Range+Tarsus Length+Migratory Distance+Landscape Ruggedness	<0.001	0.254	347.018	-1.941	0.14
phylog.struct.stem.climate.breadth	Migratory Distance	Phylogeographic Structure (0.9) ~ Mean Stem Age+Prop. Range Size Sampled+Range Size+Annual Temp. Range+Temp. Seasonality Range+Annual Precip.+Precip. Seasonality+Elevational Range+Tarsus Length+Hand Wing Index+Landscape Ruggedness	<0.001	0.254	347.052	-1.907	0.138
phylog.struct.stem.climate.breadth	RANGE.bio1	Phylogeographic Structure (0.9) ~ Mean Stem Age+Prop. Range Size Sampled+Range Size+Temp. Seasonality Range+Annual Precip.+Precip. Seasonality+Elevational Range+Tarsus Length+Hand Wing Index+Migratory Distance+Landscape Ruggedness	<0.001	0.253	347.28	-1.679	0.123
phylog.struct.stem.climate.breadth	Tarsus Length	Phylogeographic Structure (0.9) ~ Mean Stem Age+Prop. Range Size Sampled+Range Size+Annual Temp. Range+Temp. Seasonality Range+Annual Precip.+Precip. Seasonality+Elevational Range+Hand Wing Index+Migratory Distance+Landscape Ruggedness	<0.001	0.253	347.436	-1.523	0.114
phylog.struct.stem.climate.breadth	RANGE.bio15	Phylogeographic Structure (0.9) ~ Mean Stem Age+Prop. Range Size Sampled+Range Size+Annual Temp. Range+Temp. Seasonality Range+Annual Precip.+Elevational Range+Tarsus Length+Hand Wing Index+Migratory Distance+Landscape Ruggedness	<0.001	0.252	347.543	-1.416	0.108
phylog.struct.stem.climate.breadth	RANGE.bio4	Phylogeographic Structure (0.9) ~ Mean Stem Age+Prop. Range Size Sampled+Range Size+Annual Temp. Range+Annual Precip.+Precip. Seasonality+Elevational Range+Tarsus Length+Hand Wing Index+Migratory Distance+Landscape Ruggedness	<0.001	0.25	348.101	-0.858	0.081
phylog.struct.stem.climate.breadth	Landscape Ruggedness	Phylogeographic Structure (0.9) ~ Mean Stem Age+Prop. Range Size Sampled+Range Size+Annual Temp. Range+Temp. Seasonality Range+Annual Precip.+Precip. Seasonality+Elevational Range+Tarsus Length+Hand Wing Index+Migratory Distance	<0.001	0.25	348.326	-0.633	0.073
phylog.struct.stem.climate.breadth	Full Model	Phylogeographic Structure (0.9) ~ Mean Stem Age+Prop. Range Size Sampled+Range Size+Annual Temp. Range+Temp. Seasonality Range+Annual Precip.+Precip. Seasonality+Elevational Range+Tarsus Length+Hand Wing Index+Migratory Distance+Landscape Ruggedness	<0.001	0.252	348.959	0	0.053
phylog.struct.stem.climate.breadth	Range Size	Phylogeographic Structure (0.9) ~ Mean Stem Age+Prop. Range Size Sampled+Annual Temp. Range+Temp. Seasonality Range+Annual Precip.+Precip. Seasonality+Elevational Range+Tarsus Length+Hand Wing Index+Migratory Distance+Landscape Ruggedness	<0.001	0.237	351.693	2.734	0.014
phylog.struct.stem.climate.breadth	RANGE.bio12	Phylogeographic Structure (0.9) ~ Mean Stem Age+Prop. Range Size Sampled+Range Size+Annual Temp. Range+Temp. Seasonality Range+Precip. Seasonality+Elevational Range+Tarsus Length+Hand Wing Index+Migratory Distance+Landscape Ruggedness	<0.001	0.236	352.148	3.189	0.011
phylog.struct.stem.climate.breadth	Prop. Range Size Sampled	Phylogeographic Structure (0.9) ~ Mean Stem Age+Range Size+Annual Temp. Range+Temp. Seasonality Range+Annual Precip.+Precip. Seasonality+Elevational Range+Tarsus Length+Hand Wing Index+Migratory Distance+Landscape Ruggedness	<0.001	0.223	355.58	6.621	0.002
phylog.struct.stem.climate.breadth	Age	Phylogeographic Structure (0.9) ~ Prop. Range Size Sampled+Range Size+Annual Temp. Range+Temp. Seasonality Range+Annual Precip.+Precip. Seasonality+Elevational Range+Tarsus Length+Hand Wing Index+Migratory Distance+Landscape Ruggedness	<0.001	0.202	361.132	12.172	0
phylog.struct.stem.climate.stability	CS_bio_15	Phylogeographic Structure (0.9) ~ Mean Stem Age+Prop. Range Size Sampled+Range Size+CS Annual Temp.+CS Temp. Seasonality+CS Annual Precip.+Elevation+Tarsus Length+Hand Wing Index+Migratory Distance+Landscape Ruggedness	<0.001	0.249	348.517	-2.166	0.162
phylog.struct.stem.climate.stability	Tarsus Length	Phylogeographic Structure (0.9) ~ Mean Stem Age+Prop. Range Size Sampled+Range Size+CS Annual Temp.+CS Temp. Seasonality+CS Annual Precip.+CS Precip. Seasonality+Elevation+Hand Wing Index+Migratory Distance+Landscape Ruggedness	<0.001	0.249	348.534	-2.149	0.161
phylog.struct.stem.climate.stability	Migratory Distance	Phylogeographic Structure (0.9) ~ Mean Stem Age+Prop. Range Size Sampled+Range Size+CS Annual Temp.+CS Temp. Seasonality+CS Annual Precip.+CS Precip. Seasonality+Elevation+Tarsus Length+Hand Wing Index+Landscape Ruggedness	<0.001	0.248	348.636	-2.047	0.153
phylog.struct.stem.climate.stability	Landscape Ruggedness	Phylogeographic Structure (0.9) ~ Mean Stem Age+Prop. Range Size Sampled+Range Size+CS Annual Temp.+CS Temp. Seasonality+CS Annual Precip.+CS Precip. Seasonality+Elevation+Tarsus Length+Hand Wing Index+Migratory Distance	<0.001	0.247	348.919	-1.765	0.132
phylog.struct.stem.climate.stability	Hand Wing Index	Phylogeographic Structure (0.9) ~ Mean Stem Age+Prop. Range Size Sampled+Range Size+CS Annual Temp.+CS Temp. Seasonality+CS Annual Precip.+CS Precip. Seasonality+Elevation+Tarsus Length+Migratory Distance+Landscape Ruggedness	<0.001	0.247	349.004	-1.679	0.127
phylog.struct.stem.climate.stability	CS_bio_12	Phylogeographic Structure (0.9) ~ Mean Stem Age+Prop. Range Size Sampled+Range Size+CS Annual Temp.+CS Temp. Seasonality+CS Precip. Seasonality+Elevation+Tarsus Length+Hand Wing Index+Migratory Distance+Landscape Ruggedness	<0.001	0.245	349.638	-1.046	0.092
phylog.struct.stem.climate.stability	Full Model	Phylogeographic Structure (0.9) ~ Mean Stem Age+Prop. Range Size Sampled+Range Size+CS Annual Temp.+CS Temp. Seasonality+CS Annual Precip.+CS Precip. Seasonality+Elevation+Tarsus Length+Hand Wing Index+Migratory Distance+Landscape Ruggedness	<0.001	0.245	350.683	0	0.055
phylog.struct.stem.climate.stability	CS_bio_01	Phylogeographic Structure (0.9) ~ Mean Stem Age+Prop. Range Size Sampled+Range Size+CS Temp. Seasonality+CS Annual Precip.+CS Precip. Seasonality+Elevation+Tarsus Length+Hand Wing Index+Migratory Distance+Landscape Ruggedness	<0.001	0.24	350.858	0.175	0.05
phylog.struct.stem.climate.stability	Elevation	Phylogeographic Structure (0.9) ~ Mean Stem Age+Prop. Range Size Sampled+Range Size+CS Annual Temp.+CS Temp. Seasonality+CS Annual Precip.+CS Precip. Seasonality+Tarsus Length+Hand Wing Index+Migratory Distance+Landscape Ruggedness	<0.001	0.239	351.176	0.493	0.043
phylog.struct.stem.climate.stability	CS_bio_04	Phylogeographic Structure (0.9) ~ Mean Stem Age+Prop. Range Size Sampled+Range Size+CS Annual Temp.+CS Annual Precip.+CS Precip. Seasonality+Elevation+Tarsus Length+Hand Wing Index+Migratory Distance+Landscape Ruggedness	<0.001	0.235	352.42	1.736	0.023
phylog.struct.stem.climate.stability	Prop. Range Size Sampled	Phylogeographic Structure (0.9) ~ Mean Stem Age+Range Size+CS Annual Temp.+CS Temp. Seasonality+CS Annual Precip.+CS Precip. Seasonality+Elevation+Tarsus Length+Hand Wing Index+Migratory Distance+Landscape Ruggedness	<0.001	0.211	358.804	8.121	0.001
phylog.struct.stem.climate.stability	Range Size	Phylogeographic Structure (0.9) ~ Mean Stem Age+Prop. Range Size Sampled+CS Annual Temp.+CS Temp. Seasonality+CS Annual Precip.+CS Precip. Seasonality+Elevation+Tarsus Length+Hand Wing Index+Migratory Distance+Landscape Ruggedness	<0.001	0.21	359.101	8.417	0.001
phylog.struct.stem.climate.stability	Age	Phylogeographic Structure (0.9) ~ Prop. Range Size Sampled+Range Size+CS Annual Temp.+CS Temp. Seasonality+CS Annual Precip.+CS Precip. Seasonality+Elevation+Tarsus Length+Hand Wing Index+Migratory Distance+Landscape Ruggedness	<0.001	0.203	360.845	10.162	0
phylog.struct.stem.lat	Migratory Distance	Phylogeographic Structure (0.9) ~ Mean Stem Age+Prop. Range Size Sampled+Range Size+Latitude Mid.+Elevation+Tarsus Length+Hand Wing Index+Landscape Ruggedness	<0.001	0.27	338.908	-2.193	0.215
phylog.struct.stem.lat	Landscape Ruggedness	Phylogeographic Structure (0.9) ~ Mean Stem Age+Prop. Range Size Sampled+Range Size+Latitude Mid.+Elevation+Tarsus Length+Hand Wing Index+Migratory Distance	<0.001	0.27	338.913	-2.188	0.214
phylog.struct.stem.lat	Hand Wing Index	Phylogeographic Structure (0.9) ~ Mean Stem Age+Prop. Range Size Sampled+Range Size+Latitude Mid.+Elevation+Tarsus Length+Migratory Distance+Landscape Ruggedness	<0.001	0.27	338.988	-2.114	0.206
phylog.struct.stem.lat	Tarsus Length	Phylogeographic Structure (0.9) ~ Mean Stem Age+Prop. Range Size Sampled+Range Size+Latitude Mid.+Elevation+Hand Wing Index+Migratory Distance+Landscape Ruggedness	<0.001	0.27	339.116	-1.985	0.194
phylog.struct.stem.lat	Elevation	Phylogeographic Structure (0.9) ~ Mean Stem Age+Prop. Range Size Sampled+Range Size+Latitude Mid.+Tarsus Length+Hand Wing Index+Migratory Distance+Landscape Ruggedness	<0.001	0.265	340.574	-0.527	0.093
phylog.struct.stem.lat	Full Model	Phylogeographic Structure (0.9) ~ Mean Stem Age+Prop. Range Size Sampled+Range Size+Latitude Mid.+Elevation+Tarsus Length+Hand Wing Index+Migratory Distance+Landscape Ruggedness	<0.001	0.267	341.101	0	0.072
phylog.struct.stem.lat	Prop. Range Size Sampled	Phylogeographic Structure (0.9) ~ Mean Stem Age+Range Size+Latitude Mid.+Elevation+Tarsus Length+Hand Wing Index+Migratory Distance+Landscape Ruggedness	<0.001	0.241	347.051	5.95	0.004
phylog.struct.stem.lat	Range Size	Phylogeographic Structure (0.9) ~ Mean Stem Age+Prop. Range Size Sampled+Latitude Mid.+Elevation+Tarsus Length+Hand Wing Index+Migratory Distance+Landscape Ruggedness	<0.001	0.236	348.401	7.3	0.002
phylog.struct.stem.lat	Age	Phylogeographic Structure (0.9) ~ Prop. Range Size Sampled+Range Size+Latitude Mid.+Elevation+Tarsus Length+Hand Wing Index+Migratory Distance+Landscape Ruggedness	<0.001	0.219	353.187	12.086	0
phylog.struct.stem.lat	Latitude Mid.	Phylogeographic Structure (0.9) ~ Mean Stem Age+Prop. Range Size Sampled+Range Size+Elevation+Tarsus Length+Hand Wing Index+Migratory Distance+Landscape Ruggedness	<0.001	0.216	354.06	12.959	0
phylog.struct.stem.NPP	Migratory Distance	Phylogeographic Structure (0.9) ~ Mean Stem Age+Prop. Range Size Sampled+Range Size+NPP+Elevation+Tarsus Length+Hand Wing Index+Landscape Ruggedness	<0.001	0.249	344.816	-2.203	0.228
phylog.struct.stem.NPP	Landscape Ruggedness	Phylogeographic Structure (0.9) ~ Mean Stem Age+Prop. Range Size Sampled+Range Size+NPP+Elevation+Tarsus Length+Hand Wing Index+Migratory Distance	<0.001	0.249	344.931	-2.088	0.215
phylog.struct.stem.NPP	Tarsus Length	Phylogeographic Structure (0.9) ~ Mean Stem Age+Prop. Range Size Sampled+Range Size+NPP+Elevation+Hand Wing Index+Migratory Distance+Landscape Ruggedness	<0.001	0.249	344.938	-2.08	0.214
phylog.struct.stem.NPP	Hand Wing Index	Phylogeographic Structure (0.9) ~ Mean Stem Age+Prop. Range Size Sampled+Range Size+NPP+Elevation+Tarsus Length+Migratory Distance+Landscape Ruggedness	<0.001	0.248	345.196	-1.822	0.188
phylog.struct.stem.NPP	Full Model	Phylogeographic Structure (0.9) ~ Mean Stem Age+Prop. Range Size Sampled+Range Size+NPP+Elevation+Tarsus Length+Hand Wing Index+Migratory Distance+Landscape Ruggedness	<0.001	0.246	347.018	0	0.076
phylog.struct.stem.NPP	Elevation	Phylogeographic Structure (0.9) ~ Mean Stem Age+Prop. Range Size Sampled+Range Size+NPP+Tarsus Length+Hand Wing Index+Migratory Distance+Landscape Ruggedness	<0.001	0.241	347.18	0.162	0.07
phylog.struct.stem.NPP	Range Size	Phylogeographic Structure (0.9) ~ Mean Stem Age+Prop. Range Size Sampled+NPP+Elevation+Tarsus Length+Hand Wing Index+Migratory Distance+Landscape Ruggedness	<0.001	0.223	352.117	5.099	0.006
phylog.struct.stem.NPP	NPP	Phylogeographic Structure (0.9) ~ Mean Stem Age+Prop. Range Size Sampled+Range Size+Elevation+Tarsus Length+Hand Wing Index+Migratory Distance+Landscape Ruggedness	<0.001	0.216	354.06	7.042	0.002
phylog.struct.stem.NPP	Prop. Range Size Sampled	Phylogeographic Structure (0.9) ~ Mean Stem Age+Range Size+NPP+Elevation+Tarsus Length+Hand Wing Index+Migratory Distance+Landscape Ruggedness	<0.001	0.209	355.91	8.892	0.001
phylog.struct.stem.NPP	Age	Phylogeographic Structure (0.9) ~ Prop. Range Size Sampled+Range Size+NPP+Elevation+Tarsus Length+Hand Wing Index+Migratory Distance+Landscape Ruggedness	<0.001	0.198	358.646	11.628	0
phylog.struct.stem.pc1	Tarsus Length	Phylogeographic Structure (0.9) ~ Mean Stem Age+Prop. Range Size Sampled+Range Size+Bioclim PC1+Elevation+Hand Wing Index+Migratory Distance+Landscape Ruggedness	<0.001	0.254	343.434	-2.119	0.239
phylog.struct.stem.pc1	Landscape Ruggedness	Phylogeographic Structure (0.9) ~ Mean Stem Age+Prop. Range Size Sampled+Range Size+Bioclim PC1+Elevation+Tarsus Length+Hand Wing Index+Migratory Distance	<0.001	0.254	343.608	-1.945	0.219
phylog.struct.stem.pc1	Hand Wing Index	Phylogeographic Structure (0.9) ~ Mean Stem Age+Prop. Range Size Sampled+Range Size+Bioclim PC1+Elevation+Tarsus Length+Migratory Distance+Landscape Ruggedness	<0.001	0.254	343.619	-1.935	0.218
phylog.struct.stem.pc1	Migratory Distance	Phylogeographic Structure (0.9) ~ Mean Stem Age+Prop. Range Size Sampled+Range Size+Bioclim PC1+Elevation+Tarsus Length+Hand Wing Index+Landscape Ruggedness	<0.001	0.254	343.624	-1.929	0.217
phylog.struct.stem.pc1	Full Model	Phylogeographic Structure (0.9) ~ Mean Stem Age+Prop. Range Size Sampled+Range Size+Bioclim PC1+Elevation+Tarsus Length+Hand Wing Index+Migratory Distance+Landscape Ruggedness	<0.001	0.251	345.554	0	0.083
phylog.struct.stem.pc1	Elevation	Phylogeographic Structure (0.9) ~ Mean Stem Age+Prop. Range Size Sampled+Range Size+Bioclim PC1+Tarsus Length+Hand Wing Index+Migratory Distance+Landscape Ruggedness	<0.001	0.237	348.372	2.818	0.02
phylog.struct.stem.pc1	Prop. Range Size Sampled	Phylogeographic Structure (0.9) ~ Mean Stem Age+Range Size+Bioclim PC1+Elevation+Tarsus Length+Hand Wing Index+Migratory Distance+Landscape Ruggedness	<0.001	0.218	353.434	7.88	0.002
phylog.struct.stem.pc1	Bioclim PC1	Phylogeographic Structure (0.9) ~ Mean Stem Age+Prop. Range Size Sampled+Range Size+Elevation+Tarsus Length+Hand Wing Index+Migratory Distance+Landscape Ruggedness	<0.001	0.216	354.06	8.506	0.001
phylog.struct.stem.pc1	Range Size	Phylogeographic Structure (0.9) ~ Mean Stem Age+Prop. Range Size Sampled+Bioclim PC1+Elevation+Tarsus Length+Hand Wing Index+Migratory Distance+Landscape Ruggedness	<0.001	0.214	354.355	8.801	0.001
phylog.struct.stem.pc1	Age	Phylogeographic Structure (0.9) ~ Prop. Range Size Sampled+Range Size+Bioclim PC1+Elevation+Tarsus Length+Hand Wing Index+Migratory Distance+Landscape Ruggedness	<0.001	0.201	357.765	12.211	0
lineage.loss.climate.breadth	Hand Wing Index	LineAge Loss ~ Prop. Range Size Sampled+Range Size+Annual Temp. Range+Temp. Seasonality Range+Annual Precip.+Precip. Seasonality+Elevational Range+Tarsus Length+Migratory Distance+Landscape Ruggedness	<0.001	0.15	-58.272	-2.25	0.287
lineage.loss.climate.breadth	RANGE.bio15	LineAge Loss ~ Prop. Range Size Sampled+Range Size+Annual Temp. Range+Temp. Seasonality Range+Annual Precip.+Elevational Range+Tarsus Length+Hand Wing Index+Migratory Distance+Landscape Ruggedness	<0.001	0.143	-56.657	-0.635	0.128
lineage.loss.climate.breadth	RANGE.bio1	LineAge Loss ~ Prop. Range Size Sampled+Range Size+Temp. Seasonality Range+Annual Precip.+Precip. Seasonality+Elevational Range+Tarsus Length+Hand Wing Index+Migratory Distance+Landscape Ruggedness	<0.001	0.142	-56.265	-0.243	0.105
lineage.loss.climate.breadth	Full Model	LineAge Loss ~ Prop. Range Size Sampled+Range Size+Annual Temp. Range+Temp. Seasonality Range+Annual Precip.+Precip. Seasonality+Elevational Range+Tarsus Length+Hand Wing Index+Migratory Distance+Landscape Ruggedness	<0.001	0.146	-56.022	0	0.093
lineage.loss.climate.breadth	Prop. Range Size Sampled	LineAge Loss ~ Range Size+Annual Temp. Range+Temp. Seasonality Range+Annual Precip.+Precip. Seasonality+Elevational Range+Tarsus Length+Hand Wing Index+Migratory Distance+Landscape Ruggedness	<0.001	0.14	-55.686	0.336	0.079
lineage.loss.climate.breadth	Tarsus Length	LineAge Loss ~ Prop. Range Size Sampled+Range Size+Annual Temp. Range+Temp. Seasonality Range+Annual Precip.+Precip. Seasonality+Elevational Range+Hand Wing Index+Migratory Distance+Landscape Ruggedness	<0.001	0.139	-55.536	0.486	0.073
lineage.loss.climate.breadth	Landscape Ruggedness	LineAge Loss ~ Prop. Range Size Sampled+Range Size+Annual Temp. Range+Temp. Seasonality Range+Annual Precip.+Precip. Seasonality+Elevational Range+Tarsus Length+Hand Wing Index+Migratory Distance	<0.001	0.138	-55.374	0.647	0.067
lineage.loss.climate.breadth	RANGE.bio4	LineAge Loss ~ Prop. Range Size Sampled+Range Size+Annual Temp. Range+Annual Precip.+Precip. Seasonality+Elevational Range+Tarsus Length+Hand Wing Index+Migratory Distance+Landscape Ruggedness	<0.001	0.136	-54.843	1.178	0.052
lineage.loss.climate.breadth	Elevation	LineAge Loss ~ Prop. Range Size Sampled+Range Size+Annual Temp. Range+Temp. Seasonality Range+Annual Precip.+Precip. Seasonality+Tarsus Length+Hand Wing Index+Migratory Distance+Landscape Ruggedness	<0.001	0.135	-54.606	1.415	0.046
lineage.loss.climate.breadth	Migratory Distance	LineAge Loss ~ Prop. Range Size Sampled+Range Size+Annual Temp. Range+Temp. Seasonality Range+Annual Precip.+Precip. Seasonality+Elevational Range+Tarsus Length+Hand Wing Index+Landscape Ruggedness	<0.001	0.135	-54.527	1.495	0.044
lineage.loss.climate.breadth	Range Size	LineAge Loss ~ Prop. Range Size Sampled+Annual Temp. Range+Temp. Seasonality Range+Annual Precip.+Precip. Seasonality+Elevational Range+Tarsus Length+Hand Wing Index+Migratory Distance+Landscape Ruggedness	<0.001	0.129	-53.141	2.88	0.022
lineage.loss.climate.breadth	RANGE.bio12	LineAge Loss ~ Prop. Range Size Sampled+Range Size+Annual Temp. Range+Temp. Seasonality Range+Precip. Seasonality+Elevational Range+Tarsus Length+Hand Wing Index+Migratory Distance+Landscape Ruggedness	<0.001	0.113	-49.415	6.606	0.003
lineage.loss.climate.stability	Hand Wing Index	LineAge Loss ~ Prop. Range Size Sampled+Range Size+CS Annual Temp.+CS Temp. Seasonality+CS Annual Precip.+CS Precip. Seasonality+Elevation+Tarsus Length+Migratory Distance+Landscape Ruggedness	<0.001	0.109	-48.377	-2.152	0.239
lineage.loss.climate.stability	CS_bio_12	LineAge Loss ~ Prop. Range Size Sampled+Range Size+CS Annual Temp.+CS Temp. Seasonality+CS Precip. Seasonality+Elevation+Tarsus Length+Hand Wing Index+Migratory Distance+Landscape Ruggedness	<0.001	0.108	-48.224	-1.999	0.222
lineage.loss.climate.stability	Elevation	LineAge Loss ~ Prop. Range Size Sampled+Range Size+CS Annual Temp.+CS Temp. Seasonality+CS Annual Precip.+CS Precip. Seasonality+Tarsus Length+Hand Wing Index+Migratory Distance+Landscape Ruggedness	<0.001	0.103	-47.03	-0.805	0.122
lineage.loss.climate.stability	CS_bio_15	LineAge Loss ~ Prop. Range Size Sampled+Range Size+CS Annual Temp.+CS Temp. Seasonality+CS Annual Precip.+Elevation+Tarsus Length+Hand Wing Index+Migratory Distance+Landscape Ruggedness	<0.001	0.102	-46.795	-0.571	0.108
lineage.loss.climate.stability	Full Model	LineAge Loss ~ Prop. Range Size Sampled+Range Size+CS Annual Temp.+CS Temp. Seasonality+CS Annual Precip.+CS Precip. Seasonality+Elevation+Tarsus Length+Hand Wing Index+Migratory Distance+Landscape Ruggedness	<0.001	0.105	-46.225	0	0.082
lineage.loss.climate.stability	CS_bio_01	LineAge Loss ~ Prop. Range Size Sampled+Range Size+CS Temp. Seasonality+CS Annual Precip.+CS Precip. Seasonality+Elevation+Tarsus Length+Hand Wing Index+Migratory Distance+Landscape Ruggedness	0.001	0.097	-45.567	0.658	0.059
lineage.loss.climate.stability	Tarsus Length	LineAge Loss ~ Prop. Range Size Sampled+Range Size+CS Annual Temp.+CS Temp. Seasonality+CS Annual Precip.+CS Precip. Seasonality+Elevation+Hand Wing Index+Migratory Distance+Landscape Ruggedness	0.001	0.096	-45.371	0.854	0.053
lineage.loss.climate.stability	CS_bio_04	LineAge Loss ~ Prop. Range Size Sampled+Range Size+CS Annual Temp.+CS Annual Precip.+CS Precip. Seasonality+Elevation+Tarsus Length+Hand Wing Index+Migratory Distance+Landscape Ruggedness	0.001	0.093	-44.747	1.478	0.039
lineage.loss.climate.stability	Prop. Range Size Sampled	LineAge Loss ~ Range Size+CS Annual Temp.+CS Temp. Seasonality+CS Annual Precip.+CS Precip. Seasonality+Elevation+Tarsus Length+Hand Wing Index+Migratory Distance+Landscape Ruggedness	0.001	0.09	-43.975	2.25	0.026
lineage.loss.climate.stability	Migratory Distance	LineAge Loss ~ Prop. Range Size Sampled+Range Size+CS Annual Temp.+CS Temp. Seasonality+CS Annual Precip.+CS Precip. Seasonality+Elevation+Tarsus Length+Hand Wing Index+Landscape Ruggedness	0.001	0.09	-43.926	2.299	0.026
lineage.loss.climate.stability	Landscape Ruggedness	LineAge Loss ~ Prop. Range Size Sampled+Range Size+CS Annual Temp.+CS Temp. Seasonality+CS Annual Precip.+CS Precip. Seasonality+Elevation+Tarsus Length+Hand Wing Index+Migratory Distance	0.001	0.089	-43.654	2.571	0.023
lineage.loss.climate.stability	Range Size	LineAge Loss ~ Prop. Range Size Sampled+CS Annual Temp.+CS Temp. Seasonality+CS Annual Precip.+CS Precip. Seasonality+Elevation+Tarsus Length+Hand Wing Index+Migratory Distance+Landscape Ruggedness	0.01	0.063	-37.993	8.232	0.001
lineage.loss.latitude	Elevation	LineAge Loss ~ Prop. Range Size Sampled+Range Size+Latitude Mid.+Tarsus Length+Hand Wing Index+Migratory Distance+Landscape Ruggedness	<0.001	0.149	-61.411	-1.548	0.266
lineage.loss.latitude	Hand Wing Index	LineAge Loss ~ Prop. Range Size Sampled+Range Size+Latitude Mid.+Elevation+Tarsus Length+Migratory Distance+Landscape Ruggedness	<0.001	0.149	-61.373	-1.51	0.261
lineage.loss.latitude	Landscape Ruggedness	LineAge Loss ~ Prop. Range Size Sampled+Range Size+Latitude Mid.+Elevation+Tarsus Length+Hand Wing Index+Migratory Distance	<0.001	0.144	-60.168	-0.306	0.143
lineage.loss.latitude	Full Model	LineAge Loss ~ Prop. Range Size Sampled+Range Size+Latitude Mid.+Elevation+Tarsus Length+Hand Wing Index+Migratory Distance+Landscape Ruggedness	<0.001	0.147	-59.863	0	0.123
lineage.loss.latitude	Prop. Range Size Sampled	LineAge Loss ~ Range Size+Latitude Mid.+Elevation+Tarsus Length+Hand Wing Index+Migratory Distance+Landscape Ruggedness	<0.001	0.141	-59.457	0.405	0.1
lineage.loss.latitude	Migratory Distance	LineAge Loss ~ Prop. Range Size Sampled+Range Size+Latitude Mid.+Elevation+Tarsus Length+Hand Wing Index+Landscape Ruggedness	<0.001	0.137	-58.478	1.385	0.061
lineage.loss.latitude	Tarsus Length	LineAge Loss ~ Prop. Range Size Sampled+Range Size+Latitude Mid.+Elevation+Hand Wing Index+Migratory Distance+Landscape Ruggedness	<0.001	0.134	-57.761	2.102	0.043
lineage.loss.latitude	Range Size	LineAge Loss ~ Prop. Range Size Sampled+Latitude Mid.+Elevation+Tarsus Length+Hand Wing Index+Migratory Distance+Landscape Ruggedness	<0.001	0.105	-50.921	8.942	0.001
lineage.loss.latitude	Latitude Mid.	LineAge Loss ~ Prop. Range Size Sampled+Range Size+Elevation+Tarsus Length+Hand Wing Index+Migratory Distance+Landscape Ruggedness	0.006	0.062	-41.095	18.768	0
lineage.loss.NPP	Hand Wing Index	LineAge Loss ~ Prop. Range Size Sampled+Range Size+NPP+Elevation+Tarsus Length+Migratory Distance+Landscape Ruggedness	<0.001	0.119	-54.275	-1.977	0.363
lineage.loss.NPP	Elevation	LineAge Loss ~ Prop. Range Size Sampled+Range Size+NPP+Tarsus Length+Hand Wing Index+Migratory Distance+Landscape Ruggedness	<0.001	0.115	-53.275	-0.976	0.22
lineage.loss.NPP	Full Model	LineAge Loss ~ Prop. Range Size Sampled+Range Size+NPP+Elevation+Tarsus Length+Hand Wing Index+Migratory Distance+Landscape Ruggedness	<0.001	0.116	-52.299	0	0.135
lineage.loss.NPP	Landscape Ruggedness	LineAge Loss ~ Prop. Range Size Sampled+Range Size+NPP+Elevation+Tarsus Length+Hand Wing Index+Migratory Distance	<0.001	0.109	-51.954	0.344	0.114
lineage.loss.NPP	Tarsus Length	LineAge Loss ~ Prop. Range Size Sampled+Range Size+NPP+Elevation+Hand Wing Index+Migratory Distance+Landscape Ruggedness	<0.001	0.104	-50.806	1.493	0.064
lineage.loss.NPP	Migratory Distance	LineAge Loss ~ Prop. Range Size Sampled+Range Size+NPP+Elevation+Tarsus Length+Hand Wing Index+Landscape Ruggedness	<0.001	0.104	-50.63	1.668	0.059
lineage.loss.NPP	Prop. Range Size Sampled	LineAge Loss ~ Range Size+NPP+Elevation+Tarsus Length+Hand Wing Index+Migratory Distance+Landscape Ruggedness	<0.001	0.099	-49.543	2.756	0.034
lineage.loss.NPP	Range Size	LineAge Loss ~ Prop. Range Size Sampled+NPP+Elevation+Tarsus Length+Hand Wing Index+Migratory Distance+Landscape Ruggedness	0.001	0.086	-46.496	5.803	0.007
lineage.loss.NPP	NPP	LineAge Loss ~ Prop. Range Size Sampled+Range Size+Elevation+Tarsus Length+Hand Wing Index+Migratory Distance+Landscape Ruggedness	0.001	0.084	-44.587	7.712	0.003
lineage.loss.pc1	Hand Wing Index	LineAge Loss ~ Prop. Range Size Sampled+Range Size+Bioclim PC1+Elevation+Tarsus Length+Migratory Distance+Landscape Ruggedness	<0.001	0.131	-57.151	-1.83	0.456
lineage.loss.pc1	Full Model	LineAge Loss ~ Prop. Range Size Sampled+Range Size+Bioclim PC1+Elevation+Tarsus Length+Hand Wing Index+Migratory Distance+Landscape Ruggedness	<0.001	0.128	-55.32	0	0.183
lineage.loss.pc1	Landscape Ruggedness	LineAge Loss ~ Prop. Range Size Sampled+Range Size+Bioclim PC1+Elevation+Tarsus Length+Hand Wing Index+Migratory Distance	<0.001	0.119	-54.241	1.079	0.107
lineage.loss.pc1	Tarsus Length	LineAge Loss ~ Prop. Range Size Sampled+Range Size+Bioclim PC1+Elevation+Hand Wing Index+Migratory Distance+Landscape Ruggedness	<0.001	0.117	-53.873	1.448	0.089
lineage.loss.pc1	Elevation	LineAge Loss ~ Prop. Range Size Sampled+Range Size+Bioclim PC1+Tarsus Length+Hand Wing Index+Migratory Distance+Landscape Ruggedness	<0.001	0.115	-53.407	1.913	0.07
lineage.loss.pc1	Prop. Range Size Sampled	LineAge Loss ~ Range Size+Bioclim PC1+Elevation+Tarsus Length+Hand Wing Index+Migratory Distance+Landscape Ruggedness	<0.001	0.115	-53.376	1.944	0.069
lineage.loss.pc1	Migratory Distance	LineAge Loss ~ Prop. Range Size Sampled+Range Size+Bioclim PC1+Elevation+Tarsus Length+Hand Wing Index+Landscape Ruggedness	<0.001	0.107	-51.37	3.95	0.025
lineage.loss.pc1	Range Size	LineAge Loss ~ Prop. Range Size Sampled+Bioclim PC1+Elevation+Tarsus Length+Hand Wing Index+Migratory Distance+Landscape Ruggedness	0.002	0.074	-43.89	11.43	0.001
lineage.loss.pc1	Bioclim PC1	LineAge Loss ~ Prop. Range Size Sampled+Range Size+Elevation+Tarsus Length+Hand Wing Index+Migratory Distance+Landscape Ruggedness	0.006	0.062	-41.095	14.225	0
Mean Stem Age.climate.breadth	Landscape Ruggedness	Mean Stem Age ~ Prop. Range Size Sampled+Range Size+Annual Temp. Range+Temp. Seasonality Range+Annual Precip.+Precip. Seasonality+Elevational Range+Tarsus Length+Hand Wing Index+Migratory Distance	<0.001	0.256	440.267	-2.25	0.26
Mean Stem Age.climate.breadth	Tarsus Length	Mean Stem Age ~ Prop. Range Size Sampled+Range Size+Annual Temp. Range+Temp. Seasonality Range+Annual Precip.+Precip. Seasonality+Elevational Range+Hand Wing Index+Migratory Distance+Landscape Ruggedness	<0.001	0.256	440.312	-2.205	0.255
Mean Stem Age.climate.breadth	RANGE.bio4	Mean Stem Age ~ Prop. Range Size Sampled+Range Size+Annual Temp. Range+Annual Precip.+Precip. Seasonality+Elevational Range+Tarsus Length+Hand Wing Index+Migratory Distance+Landscape Ruggedness	<0.001	0.249	442.238	-0.279	0.097
Mean Stem Age.climate.breadth	Hand Wing Index	Mean Stem Age ~ Prop. Range Size Sampled+Range Size+Annual Temp. Range+Temp. Seasonality Range+Annual Precip.+Precip. Seasonality+Elevational Range+Tarsus Length+Migratory Distance+Landscape Ruggedness	<0.001	0.249	442.417	-0.101	0.089
Mean Stem Age.climate.breadth	Migratory Distance	Mean Stem Age ~ Prop. Range Size Sampled+Range Size+Annual Temp. Range+Temp. Seasonality Range+Annual Precip.+Precip. Seasonality+Elevational Range+Tarsus Length+Hand Wing Index+Landscape Ruggedness	<0.001	0.248	442.445	-0.073	0.088
Mean Stem Age.climate.breadth	Full Model	Mean Stem Age ~ Prop. Range Size Sampled+Range Size+Annual Temp. Range+Temp. Seasonality Range+Annual Precip.+Precip. Seasonality+Elevational Range+Tarsus Length+Hand Wing Index+Migratory Distance+Landscape Ruggedness	<0.001	0.252	442.517	0	0.085
Mean Stem Age.climate.breadth	RANGE.bio1	Mean Stem Age ~ Prop. Range Size Sampled+Range Size+Temp. Seasonality Range+Annual Precip.+Precip. Seasonality+Elevational Range+Tarsus Length+Hand Wing Index+Migratory Distance+Landscape Ruggedness	<0.001	0.245	443.437	0.92	0.053
Mean Stem Age.climate.breadth	RANGE.bio15	Mean Stem Age ~ Prop. Range Size Sampled+Range Size+Annual Temp. Range+Temp. Seasonality Range+Annual Precip.+Elevational Range+Tarsus Length+Hand Wing Index+Migratory Distance+Landscape Ruggedness	<0.001	0.243	444.286	1.769	0.035
Mean Stem Age.climate.breadth	Prop. Range Size Sampled	Mean Stem Age ~ Range Size+Annual Temp. Range+Temp. Seasonality Range+Annual Precip.+Precip. Seasonality+Elevational Range+Tarsus Length+Hand Wing Index+Migratory Distance+Landscape Ruggedness	<0.001	0.241	444.514	1.997	0.031
Mean Stem Age.climate.breadth	Elevation	Mean Stem Age ~ Prop. Range Size Sampled+Range Size+Annual Temp. Range+Temp. Seasonality Range+Annual Precip.+Precip. Seasonality+Tarsus Length+Hand Wing Index+Migratory Distance+Landscape Ruggedness	<0.001	0.23	447.509	4.992	0.007
Mean Stem Age.climate.breadth	Range Size	Mean Stem Age ~ Prop. Range Size Sampled+Annual Temp. Range+Temp. Seasonality Range+Annual Precip.+Precip. Seasonality+Elevational Range+Tarsus Length+Hand Wing Index+Migratory Distance+Landscape Ruggedness	<0.001	0.198	455.896	13.378	0
Mean Stem Age.climate.breadth	RANGE.bio12	Mean Stem Age ~ Prop. Range Size Sampled+Range Size+Annual Temp. Range+Temp. Seasonality Range+Precip. Seasonality+Elevational Range+Tarsus Length+Hand Wing Index+Migratory Distance+Landscape Ruggedness	<0.001	0.197	456.307	13.79	0
Mean Stem Age.climate.stability	Landscape Ruggedness	Mean Stem Age ~ Prop. Range Size Sampled+Range Size+CS Annual Temp.+CS Temp. Seasonality+CS Annual Precip.+CS Precip. Seasonality+Elevation+Tarsus Length+Hand Wing Index+Migratory Distance	<0.001	0.236	447.293	-2.248	0.177
Mean Stem Age.climate.stability	CS_bio_04	Mean Stem Age ~ Prop. Range Size Sampled+Range Size+CS Annual Temp.+CS Annual Precip.+CS Precip. Seasonality+Elevation+Tarsus Length+Hand Wing Index+Migratory Distance+Landscape Ruggedness	<0.001	0.236	447.308	-2.233	0.176
Mean Stem Age.climate.stability	CS_bio_15	Mean Stem Age ~ Prop. Range Size Sampled+Range Size+CS Annual Temp.+CS Temp. Seasonality+CS Annual Precip.+Elevation+Tarsus Length+Hand Wing Index+Migratory Distance+Landscape Ruggedness	<0.001	0.236	447.342	-2.199	0.173
Mean Stem Age.climate.stability	Migratory Distance	Mean Stem Age ~ Prop. Range Size Sampled+Range Size+CS Annual Temp.+CS Temp. Seasonality+CS Annual Precip.+CS Precip. Seasonality+Elevation+Tarsus Length+Hand Wing Index+Landscape Ruggedness	<0.001	0.234	447.948	-1.593	0.128
Mean Stem Age.climate.stability	Tarsus Length	Mean Stem Age ~ Prop. Range Size Sampled+Range Size+CS Annual Temp.+CS Temp. Seasonality+CS Annual Precip.+CS Precip. Seasonality+Elevation+Hand Wing Index+Migratory Distance+Landscape Ruggedness	<0.001	0.229	448.65	-0.891	0.09
Mean Stem Age.climate.stability	CS_bio_12	Mean Stem Age ~ Prop. Range Size Sampled+Range Size+CS Annual Temp.+CS Temp. Seasonality+CS Precip. Seasonality+Elevation+Tarsus Length+Hand Wing Index+Migratory Distance+Landscape Ruggedness	<0.001	0.228	449.41	-0.131	0.062
Mean Stem Age.climate.stability	Hand Wing Index	Mean Stem Age ~ Prop. Range Size Sampled+Range Size+CS Annual Temp.+CS Temp. Seasonality+CS Annual Precip.+CS Precip. Seasonality+Elevation+Tarsus Length+Migratory Distance+Landscape Ruggedness	<0.001	0.226	449.514	-0.027	0.058
Mean Stem Age.climate.stability	Full Model	Mean Stem Age ~ Prop. Range Size Sampled+Range Size+CS Annual Temp.+CS Temp. Seasonality+CS Annual Precip.+CS Precip. Seasonality+Elevation+Tarsus Length+Hand Wing Index+Migratory Distance+Landscape Ruggedness	<0.001	0.232	449.541	0	0.058
Mean Stem Age.climate.stability	Elevation	Mean Stem Age ~ Prop. Range Size Sampled+Range Size+CS Annual Temp.+CS Temp. Seasonality+CS Annual Precip.+CS Precip. Seasonality+Tarsus Length+Hand Wing Index+Migratory Distance+Landscape Ruggedness	<0.001	0.227	449.68	0.139	0.054
Mean Stem Age.climate.stability	Prop. Range Size Sampled	Mean Stem Age ~ Range Size+CS Annual Temp.+CS Temp. Seasonality+CS Annual Precip.+CS Precip. Seasonality+Elevation+Tarsus Length+Hand Wing Index+Migratory Distance+Landscape Ruggedness	<0.001	0.22	451.262	1.721	0.024
Mean Stem Age.climate.stability	CS_bio_01	Mean Stem Age ~ Prop. Range Size Sampled+Range Size+CS Temp. Seasonality+CS Annual Precip.+CS Precip. Seasonality+Elevation+Tarsus Length+Hand Wing Index+Migratory Distance+Landscape Ruggedness	<0.001	0.185	459.887	10.346	0
Mean Stem Age.climate.stability	Range Size	Mean Stem Age ~ Prop. Range Size Sampled+CS Annual Temp.+CS Temp. Seasonality+CS Annual Precip.+CS Precip. Seasonality+Elevation+Tarsus Length+Hand Wing Index+Migratory Distance+Landscape Ruggedness	0.002	0.087	484.24	34.699	0
Mean Stem Age.lat	Landscape Ruggedness	Mean Stem Age ~ Prop. Range Size Sampled+Range Size+Latitude Mid.+Elevation+Tarsus Length+Hand Wing Index+Migratory Distance	<0.001	0.221	446.831	-2.183	0.297
Mean Stem Age.lat	Tarsus Length	Mean Stem Age ~ Prop. Range Size Sampled+Range Size+Latitude Mid.+Elevation+Hand Wing Index+Migratory Distance+Landscape Ruggedness	<0.001	0.217	447.785	-1.229	0.185
Mean Stem Age.lat	Hand Wing Index	Mean Stem Age ~ Prop. Range Size Sampled+Range Size+Latitude Mid.+Elevation+Tarsus Length+Migratory Distance+Landscape Ruggedness	<0.001	0.214	448.559	-0.454	0.125
Mean Stem Age.lat	Elevation	Mean Stem Age ~ Prop. Range Size Sampled+Range Size+Latitude Mid.+Tarsus Length+Hand Wing Index+Migratory Distance+Landscape Ruggedness	<0.001	0.214	448.817	-0.196	0.11
Mean Stem Age.lat	Prop. Range Size Sampled	Mean Stem Age ~ Range Size+Latitude Mid.+Elevation+Tarsus Length+Hand Wing Index+Migratory Distance+Landscape Ruggedness	<0.001	0.213	448.843	-0.171	0.109
Mean Stem Age.lat	Full Model	Mean Stem Age ~ Prop. Range Size Sampled+Range Size+Latitude Mid.+Elevation+Tarsus Length+Hand Wing Index+Migratory Distance+Landscape Ruggedness	<0.001	0.217	449.014	0	0.1
Mean Stem Age.lat	Migratory Distance	Mean Stem Age ~ Prop. Range Size Sampled+Range Size+Latitude Mid.+Elevation+Tarsus Length+Hand Wing Index+Landscape Ruggedness	<0.001	0.211	449.688	0.674	0.071
Mean Stem Age.lat	Latitude Mid.	Mean Stem Age ~ Prop. Range Size Sampled+Range Size+Elevation+Tarsus Length+Hand Wing Index+Migratory Distance+Landscape Ruggedness	<0.001	0.184	456.408	7.394	0.002
Mean Stem Age.lat	Range Size	Mean Stem Age ~ Prop. Range Size Sampled+Latitude Mid.+Elevation+Tarsus Length+Hand Wing Index+Migratory Distance+Landscape Ruggedness	<0.001	0.099	478.29	29.277	0
Mean Stem Age.NPP	Landscape Ruggedness	Mean Stem Age ~ Prop. Range Size Sampled+Range Size+NPP+Elevation+Tarsus Length+Hand Wing Index+Migratory Distance	<0.001	0.232	445.694	-2.175	NA
Mean Stem Age.NPP	Migratory Distance	Mean Stem Age ~ Prop. Range Size Sampled+Range Size+NPP+Elevation+Tarsus Length+Hand Wing Index+Landscape Ruggedness	NA	NA	NA	NA	NA
Mean Stem Age.NPP	Hand Wing Index	Mean Stem Age ~ Prop. Range Size Sampled+Range Size+NPP+Elevation+Tarsus Length+Migratory Distance+Landscape Ruggedness	<0.001	0.222	447.991	0.122	NA
Mean Stem Age.NPP	Tarsus Length	Mean Stem Age ~ Prop. Range Size Sampled+Range Size+NPP+Elevation+Hand Wing Index+Migratory Distance+Landscape Ruggedness	<0.001	0.227	446.734	-1.135	NA
Mean Stem Age.NPP	Elevation	Mean Stem Age ~ Prop. Range Size Sampled+Range Size+NPP+Tarsus Length+Hand Wing Index+Migratory Distance+Landscape Ruggedness	<0.001	0.221	448.646	0.777	NA
Mean Stem Age.NPP	NPP	Mean Stem Age ~ Prop. Range Size Sampled+Range Size+Elevation+Tarsus Length+Hand Wing Index+Migratory Distance+Landscape Ruggedness	<0.001	0.185	457.259	9.389	NA
Mean Stem Age.NPP	Range Size	Mean Stem Age ~ Prop. Range Size Sampled+NPP+Elevation+Tarsus Length+Hand Wing Index+Migratory Distance+Landscape Ruggedness	<0.001	0.127	473.374	25.504	NA
Mean Stem Age.NPP	Prop. Range Size Sampled	Mean Stem Age ~ Range Size+NPP+Elevation+Tarsus Length+Hand Wing Index+Migratory Distance+Landscape Ruggedness	<0.001	0.217	449.502	1.633	NA
Mean Stem Age.NPP	Full Model	Mean Stem Age ~ Prop. Range Size Sampled+Range Size+NPP+Elevation+Tarsus Length+Hand Wing Index+Migratory Distance+Landscape Ruggedness	<0.001	0.228	447.869	0	NA
Mean Stem Age.pc1	Landscape Ruggedness	Mean Stem Age ~ Prop. Range Size Sampled+Range Size+Bioclim PC1+Elevation+Tarsus Length+Hand Wing Index+Migratory Distance	<0.001	0.224	446.199	-2.173	0.294
Mean Stem Age.pc1	Migratory Distance	Mean Stem Age ~ Prop. Range Size Sampled+Range Size+Bioclim PC1+Elevation+Tarsus Length+Hand Wing Index+Landscape Ruggedness	<0.001	0.223	446.432	-1.94	0.262
Mean Stem Age.pc1	Tarsus Length	Mean Stem Age ~ Prop. Range Size Sampled+Range Size+Bioclim PC1+Elevation+Hand Wing Index+Migratory Distance+Landscape Ruggedness	<0.001	0.218	447.416	-0.956	0.16
Mean Stem Age.pc1	Hand Wing Index	Mean Stem Age ~ Prop. Range Size Sampled+Range Size+Bioclim PC1+Elevation+Tarsus Length+Migratory Distance+Landscape Ruggedness	<0.001	0.216	448.164	-0.208	0.11
Mean Stem Age.pc1	Full Model	Mean Stem Age ~ Prop. Range Size Sampled+Range Size+Bioclim PC1+Elevation+Tarsus Length+Hand Wing Index+Migratory Distance+Landscape Ruggedness	<0.001	0.22	448.372	0	0.099
Mean Stem Age.pc1	Prop. Range Size Sampled	Mean Stem Age ~ Range Size+Bioclim PC1+Elevation+Tarsus Length+Hand Wing Index+Migratory Distance+Landscape Ruggedness	<0.001	0.211	449.437	1.065	0.058
Mean Stem Age.pc1	Elevation	Mean Stem Age ~ Prop. Range Size Sampled+Range Size+Bioclim PC1+Tarsus Length+Hand Wing Index+Migratory Distance+Landscape Ruggedness	<0.001	0.2	452.271	3.899	0.014
Mean Stem Age.pc1	Bioclim PC1	Mean Stem Age ~ Prop. Range Size Sampled+Range Size+Elevation+Tarsus Length+Hand Wing Index+Migratory Distance+Landscape Ruggedness	<0.001	0.178	457.519	9.147	0.001
Mean Stem Age.pc1	Range Size	Mean Stem Age ~ Prop. Range Size Sampled+Bioclim PC1+Elevation+Tarsus Length+Hand Wing Index+Migratory Distance+Landscape Ruggedness	0.001	0.083	481.874	33.502	0
stem.rate.climate.breadth	Hand Wing Index	Stem Splitting Rate (0.9) ~ Prop. Range Size Sampled+Range Size+Annual Temp. Range+Temp. Seasonality Range+Annual Precip.+Precip. Seasonality+Elevational Range+Tarsus Length+Migratory Distance+Landscape Ruggedness	0.026	0.05	75.576	-2.168	0.129
stem.rate.climate.breadth	RANGE.bio1	Stem Splitting Rate (0.9) ~ Prop. Range Size Sampled+Range Size+Temp. Seasonality Range+Annual Precip.+Precip. Seasonality+Elevational Range+Tarsus Length+Hand Wing Index+Migratory Distance+Landscape Ruggedness	0.027	0.05	75.632	-2.112	0.126
stem.rate.climate.breadth	Migratory Distance	Stem Splitting Rate (0.9) ~ Prop. Range Size Sampled+Range Size+Annual Temp. Range+Temp. Seasonality Range+Annual Precip.+Precip. Seasonality+Elevational Range+Tarsus Length+Hand Wing Index+Landscape Ruggedness	0.027	0.05	75.637	-2.107	0.125
stem.rate.climate.breadth	Elevation	Stem Splitting Rate (0.9) ~ Prop. Range Size Sampled+Range Size+Annual Temp. Range+Temp. Seasonality Range+Annual Precip.+Precip. Seasonality+Tarsus Length+Hand Wing Index+Migratory Distance+Landscape Ruggedness	0.027	0.05	75.675	-2.069	0.123
stem.rate.climate.breadth	RANGE.bio4	Stem Splitting Rate (0.9) ~ Prop. Range Size Sampled+Range Size+Annual Temp. Range+Annual Precip.+Precip. Seasonality+Elevational Range+Tarsus Length+Hand Wing Index+Migratory Distance+Landscape Ruggedness	0.028	0.049	75.814	-1.93	0.115
stem.rate.climate.breadth	RANGE.bio15	Stem Splitting Rate (0.9) ~ Prop. Range Size Sampled+Range Size+Annual Temp. Range+Temp. Seasonality Range+Annual Precip.+Elevational Range+Tarsus Length+Hand Wing Index+Migratory Distance+Landscape Ruggedness	0.03	0.048	76.005	-1.739	0.104
stem.rate.climate.breadth	Landscape Ruggedness	Stem Splitting Rate (0.9) ~ Prop. Range Size Sampled+Range Size+Annual Temp. Range+Temp. Seasonality Range+Annual Precip.+Precip. Seasonality+Elevational Range+Tarsus Length+Hand Wing Index+Migratory Distance	0.036	0.045	76.619	-1.125	0.077
stem.rate.climate.breadth	RANGE.bio12	Stem Splitting Rate (0.9) ~ Prop. Range Size Sampled+Range Size+Annual Temp. Range+Temp. Seasonality Range+Precip. Seasonality+Elevational Range+Tarsus Length+Hand Wing Index+Migratory Distance+Landscape Ruggedness	0.039	0.044	76.845	-0.899	0.069
stem.rate.climate.breadth	Tarsus Length	Stem Splitting Rate (0.9) ~ Prop. Range Size Sampled+Range Size+Annual Temp. Range+Temp. Seasonality Range+Annual Precip.+Precip. Seasonality+Elevational Range+Hand Wing Index+Migratory Distance+Landscape Ruggedness	0.051	0.04	77.728	-0.016	0.044
stem.rate.climate.breadth	Full Model	Stem Splitting Rate (0.9) ~ Prop. Range Size Sampled+Range Size+Annual Temp. Range+Temp. Seasonality Range+Annual Precip.+Precip. Seasonality+Elevational Range+Tarsus Length+Hand Wing Index+Migratory Distance+Landscape Ruggedness	0.04	0.046	77.744	0	0.044
stem.rate.climate.breadth	Range Size	Stem Splitting Rate (0.9) ~ Prop. Range Size Sampled+Annual Temp. Range+Temp. Seasonality Range+Annual Precip.+Precip. Seasonality+Elevational Range+Tarsus Length+Hand Wing Index+Migratory Distance+Landscape Ruggedness	0.058	0.038	78.159	0.415	0.036
stem.rate.climate.breadth	Prop. Range Size Sampled	Stem Splitting Rate (0.9) ~ Range Size+Annual Temp. Range+Temp. Seasonality Range+Annual Precip.+Precip. Seasonality+Elevational Range+Tarsus Length+Hand Wing Index+Migratory Distance+Landscape Ruggedness	0.125	0.026	80.967	3.223	0.009
stem.rate.climate.stability	Hand Wing Index	Stem Splitting Rate (0.9) ~ Prop. Range Size Sampled+Range Size+CS Annual Temp.+CS Temp. Seasonality+CS Annual Precip.+CS Precip. Seasonality+Elevation+Tarsus Length+Migratory Distance+Landscape Ruggedness	0.011	0.062	73.383	-2.251	0.152
stem.rate.climate.stability	Migratory Distance	Stem Splitting Rate (0.9) ~ Prop. Range Size Sampled+Range Size+CS Annual Temp.+CS Temp. Seasonality+CS Annual Precip.+CS Precip. Seasonality+Elevation+Tarsus Length+Hand Wing Index+Landscape Ruggedness	0.012	0.061	73.572	-2.061	0.138
stem.rate.climate.stability	CS_bio_12	Stem Splitting Rate (0.9) ~ Prop. Range Size Sampled+Range Size+CS Annual Temp.+CS Temp. Seasonality+CS Precip. Seasonality+Elevation+Tarsus Length+Hand Wing Index+Migratory Distance+Landscape Ruggedness	0.012	0.061	73.679	-1.955	0.131
stem.rate.climate.stability	CS_bio_15	Stem Splitting Rate (0.9) ~ Prop. Range Size Sampled+Range Size+CS Annual Temp.+CS Temp. Seasonality+CS Annual Precip.+Elevation+Tarsus Length+Hand Wing Index+Migratory Distance+Landscape Ruggedness	0.013	0.06	73.702	-1.931	0.129
stem.rate.climate.stability	Landscape Ruggedness	Stem Splitting Rate (0.9) ~ Prop. Range Size Sampled+Range Size+CS Annual Temp.+CS Temp. Seasonality+CS Annual Precip.+CS Precip. Seasonality+Elevation+Tarsus Length+Hand Wing Index+Migratory Distance	0.014	0.059	74.22	-1.413	0.1
stem.rate.climate.stability	CS_bio_04	Stem Splitting Rate (0.9) ~ Prop. Range Size Sampled+Range Size+CS Annual Temp.+CS Annual Precip.+CS Precip. Seasonality+Elevation+Tarsus Length+Hand Wing Index+Migratory Distance+Landscape Ruggedness	0.017	0.057	74.361	-1.273	0.093
stem.rate.climate.stability	Tarsus Length	Stem Splitting Rate (0.9) ~ Prop. Range Size Sampled+Range Size+CS Annual Temp.+CS Temp. Seasonality+CS Annual Precip.+CS Precip. Seasonality+Elevation+Hand Wing Index+Migratory Distance+Landscape Ruggedness	0.017	0.056	74.896	-0.737	0.071
stem.rate.climate.stability	CS_bio_01	Stem Splitting Rate (0.9) ~ Prop. Range Size Sampled+Range Size+CS Temp. Seasonality+CS Annual Precip.+CS Precip. Seasonality+Elevation+Tarsus Length+Hand Wing Index+Migratory Distance+Landscape Ruggedness	0.021	0.054	74.958	-0.675	0.069
stem.rate.climate.stability	Elevation	Stem Splitting Rate (0.9) ~ Prop. Range Size Sampled+Range Size+CS Annual Temp.+CS Temp. Seasonality+CS Annual Precip.+CS Precip. Seasonality+Tarsus Length+Hand Wing Index+Migratory Distance+Landscape Ruggedness	0.024	0.051	75.322	-0.311	0.058
stem.rate.climate.stability	Full Model	Stem Splitting Rate (0.9) ~ Prop. Range Size Sampled+Range Size+CS Annual Temp.+CS Temp. Seasonality+CS Annual Precip.+CS Precip. Seasonality+Elevation+Tarsus Length+Hand Wing Index+Migratory Distance+Landscape Ruggedness	0.019	0.057	75.633	0	0.049
stem.rate.climate.stability	Prop. Range Size Sampled	Stem Splitting Rate (0.9) ~ Range Size+CS Annual Temp.+CS Temp. Seasonality+CS Annual Precip.+CS Precip. Seasonality+Elevation+Tarsus Length+Hand Wing Index+Migratory Distance+Landscape Ruggedness	0.091	0.031	79.768	4.134	0.006
stem.rate.climate.stability	Range Size	Stem Splitting Rate (0.9) ~ Prop. Range Size Sampled+CS Annual Temp.+CS Temp. Seasonality+CS Annual Precip.+CS Precip. Seasonality+Elevation+Tarsus Length+Hand Wing Index+Migratory Distance+Landscape Ruggedness	0.04	0.044	80.902	5.269	0.004
stem.rate.lat	Hand Wing Index	Stem Splitting Rate (0.9) ~ Prop. Range Size Sampled+Range Size+Latitude Mid.+Elevation+Tarsus Length+Migratory Distance+Landscape Ruggedness	0.001	0.078	65.987	-2.166	0.238
stem.rate.lat	Migratory Distance	Stem Splitting Rate (0.9) ~ Prop. Range Size Sampled+Range Size+Latitude Mid.+Elevation+Tarsus Length+Hand Wing Index+Landscape Ruggedness	0.001	0.079	65.987	-2.166	0.238
stem.rate.lat	Landscape Ruggedness	Stem Splitting Rate (0.9) ~ Prop. Range Size Sampled+Range Size+Latitude Mid.+Elevation+Tarsus Length+Hand Wing Index+Migratory Distance	0.001	0.079	66.157	-1.996	0.219
stem.rate.lat	Tarsus Length	Stem Splitting Rate (0.9) ~ Prop. Range Size Sampled+Range Size+Latitude Mid.+Elevation+Hand Wing Index+Migratory Distance+Landscape Ruggedness	0.003	0.07	67.951	-0.202	0.089
stem.rate.lat	Elevation	Stem Splitting Rate (0.9) ~ Prop. Range Size Sampled+Range Size+Latitude Mid.+Tarsus Length+Hand Wing Index+Migratory Distance+Landscape Ruggedness	0.003	0.068	67.953	-0.199	0.089
stem.rate.lat	Full Model	Stem Splitting Rate (0.9) ~ Prop. Range Size Sampled+Range Size+Latitude Mid.+Elevation+Tarsus Length+Hand Wing Index+Migratory Distance+Landscape Ruggedness	0.003	0.074	68.153	0	0.081
stem.rate.lat	Latitude Mid.	Stem Splitting Rate (0.9) ~ Prop. Range Size Sampled+Range Size+Elevation+Tarsus Length+Hand Wing Index+Migratory Distance+Landscape Ruggedness	0.01	0.055	70.884	2.731	0.021
stem.rate.lat	Prop. Range Size Sampled	Stem Splitting Rate (0.9) ~ Range Size+Latitude Mid.+Elevation+Tarsus Length+Hand Wing Index+Migratory Distance+Landscape Ruggedness	0.011	0.053	71.378	3.225	0.016
stem.rate.lat	Range Size	Stem Splitting Rate (0.9) ~ Prop. Range Size Sampled+Latitude Mid.+Elevation+Tarsus Length+Hand Wing Index+Migratory Distance+Landscape Ruggedness	0.004	0.065	72.722	4.57	0.008
stem.rate.NPP	Hand Wing Index	Stem Splitting Rate (0.9) ~ Prop. Range Size Sampled+Range Size+NPP+Elevation+Tarsus Length+Migratory Distance+Landscape Ruggedness	0.002	0.071	67.88	-2.17	0.239
stem.rate.NPP	Migratory Distance	Stem Splitting Rate (0.9) ~ Prop. Range Size Sampled+Range Size+NPP+Elevation+Tarsus Length+Hand Wing Index+Landscape Ruggedness	0.002	0.072	67.915	-2.134	0.235
stem.rate.NPP	Landscape Ruggedness	Stem Splitting Rate (0.9) ~ Prop. Range Size Sampled+Range Size+NPP+Elevation+Tarsus Length+Hand Wing Index+Migratory Distance	0.002	0.072	68.131	-1.919	0.211
stem.rate.NPP	Tarsus Length	Stem Splitting Rate (0.9) ~ Prop. Range Size Sampled+Range Size+NPP+Elevation+Hand Wing Index+Migratory Distance+Landscape Ruggedness	0.005	0.064	69.825	-0.224	0.09
stem.rate.NPP	Full Model	Stem Splitting Rate (0.9) ~ Prop. Range Size Sampled+Range Size+NPP+Elevation+Tarsus Length+Hand Wing Index+Migratory Distance+Landscape Ruggedness	0.005	0.067	70.05	0	0.081
stem.rate.NPP	Elevation	Stem Splitting Rate (0.9) ~ Prop. Range Size Sampled+Range Size+NPP+Tarsus Length+Hand Wing Index+Migratory Distance+Landscape Ruggedness	0.008	0.058	70.472	0.422	0.065
stem.rate.NPP	NPP	Stem Splitting Rate (0.9) ~ Prop. Range Size Sampled+Range Size+Elevation+Tarsus Length+Hand Wing Index+Migratory Distance+Landscape Ruggedness	0.01	0.055	71.013	0.963	0.05
stem.rate.NPP	Range Size	Stem Splitting Rate (0.9) ~ Prop. Range Size Sampled+NPP+Elevation+Tarsus Length+Hand Wing Index+Migratory Distance+Landscape Ruggedness	0.004	0.065	72.796	2.747	0.02
stem.rate.NPP	Prop. Range Size Sampled	Stem Splitting Rate (0.9) ~ Range Size+NPP+Elevation+Tarsus Length+Hand Wing Index+Migratory Distance+Landscape Ruggedness	0.038	0.038	74.9	4.85	0.007
stem.rate.pc1	Hand Wing Index	Stem Splitting Rate (0.9) ~ Prop. Range Size Sampled+Range Size+Bioclim PC1+Elevation+Tarsus Length+Migratory Distance+Landscape Ruggedness	0.003	0.069	68.36	-2.183	0.247
stem.rate.pc1	Migratory Distance	Stem Splitting Rate (0.9) ~ Prop. Range Size Sampled+Range Size+Bioclim PC1+Elevation+Tarsus Length+Hand Wing Index+Landscape Ruggedness	0.003	0.068	68.481	-2.061	0.233
stem.rate.pc1	Landscape Ruggedness	Stem Splitting Rate (0.9) ~ Prop. Range Size Sampled+Range Size+Bioclim PC1+Elevation+Tarsus Length+Hand Wing Index+Migratory Distance	0.003	0.068	68.788	-1.754	0.2
stem.rate.pc1	Tarsus Length	Stem Splitting Rate (0.9) ~ Prop. Range Size Sampled+Range Size+Bioclim PC1+Elevation+Hand Wing Index+Migratory Distance+Landscape Ruggedness	0.006	0.062	70	-0.543	0.109
stem.rate.pc1	Full Model	Stem Splitting Rate (0.9) ~ Prop. Range Size Sampled+Range Size+Bioclim PC1+Elevation+Tarsus Length+Hand Wing Index+Migratory Distance+Landscape Ruggedness	0.006	0.064	70.542	0	0.083
stem.rate.pc1	Bioclim PC1	Stem Splitting Rate (0.9) ~ Prop. Range Size Sampled+Range Size+Elevation+Tarsus Length+Hand Wing Index+Migratory Distance+Landscape Ruggedness	0.01	0.055	70.984	0.441	0.067
stem.rate.pc1	Elevation	Stem Splitting Rate (0.9) ~ Prop. Range Size Sampled+Range Size+Bioclim PC1+Tarsus Length+Hand Wing Index+Migratory Distance+Landscape Ruggedness	0.013	0.051	71.753	1.21	0.045
stem.rate.pc1	Prop. Range Size Sampled	Stem Splitting Rate (0.9) ~ Range Size+Bioclim PC1+Elevation+Tarsus Length+Hand Wing Index+Migratory Distance+Landscape Ruggedness	0.037	0.038	74.694	4.152	0.01
stem.rate.pc1	Range Size	Stem Splitting Rate (0.9) ~ Prop. Range Size Sampled+Bioclim PC1+Elevation+Tarsus Length+Hand Wing Index+Migratory Distance+Landscape Ruggedness	0.042	0.037	75.787	5.245	0.006

## Sheet: AOU Age Low - Model Summaries
Model Set	Variable Removed*	Description of Model (see Materials and Methods for which variables were square root converted)	P-value	adj.R2	AICc	delta AICc	AICc weight	*see Variable Key in S2 Table
Mean Crown Age.climate.stability	Tarsus Length	Mean Crown Age ~ Prop. Range Size Sampled+Range Size+CS Annual Temp.+CS Temp. Seasonality+CS Annual Precip.+CS Precip. Seasonality+Elevation+Hand Wing Index+Migratory Distance+Landscape Ruggedness	<0.001	0.365	209.967	-2.142	0.283
Mean Crown Age.climate.stability	Elevation	Mean Crown Age ~ Prop. Range Size Sampled+Range Size+CS Annual Temp.+CS Temp. Seasonality+CS Annual Precip.+CS Precip. Seasonality+Tarsus Length+Hand Wing Index+Migratory Distance+Landscape Ruggedness	<0.001	0.362	210.756	-1.354	0.191
Mean Crown Age.climate.stability	Migratory Distance	Mean Crown Age ~ Prop. Range Size Sampled+Range Size+CS Annual Temp.+CS Temp. Seasonality+CS Annual Precip.+CS Precip. Seasonality+Elevation+Tarsus Length+Hand Wing Index+Landscape Ruggedness	<0.001	0.361	211.011	-1.099	0.168
Mean Crown Age.climate.stability	CS_bio_12	Mean Crown Age ~ Prop. Range Size Sampled+Range Size+CS Annual Temp.+CS Temp. Seasonality+CS Precip. Seasonality+Elevation+Tarsus Length+Hand Wing Index+Migratory Distance+Landscape Ruggedness	<0.001	0.361	212.062	-0.047	0.099
Mean Crown Age.climate.stability	Full Model	Mean Crown Age ~ Prop. Range Size Sampled+Range Size+CS Annual Temp.+CS Temp. Seasonality+CS Annual Precip.+CS Precip. Seasonality+Elevation+Tarsus Length+Hand Wing Index+Migratory Distance+Landscape Ruggedness	<0.001	0.362	212.11	0	0.097
Mean Crown Age.climate.stability	CS_bio_15	Mean Crown Age ~ Prop. Range Size Sampled+Range Size+CS Annual Temp.+CS Temp. Seasonality+CS Annual Precip.+Elevation+Tarsus Length+Hand Wing Index+Migratory Distance+Landscape Ruggedness	<0.001	0.354	212.691	0.582	0.072
Mean Crown Age.climate.stability	Hand Wing Index	Mean Crown Age ~ Prop. Range Size Sampled+Range Size+CS Annual Temp.+CS Temp. Seasonality+CS Annual Precip.+CS Precip. Seasonality+Elevation+Tarsus Length+Migratory Distance+Landscape Ruggedness	<0.001	0.352	213.941	1.831	0.039
Mean Crown Age.climate.stability	CS_bio_04	Mean Crown Age ~ Prop. Range Size Sampled+Range Size+CS Annual Temp.+CS Annual Precip.+CS Precip. Seasonality+Elevation+Tarsus Length+Hand Wing Index+Migratory Distance+Landscape Ruggedness	<0.001	0.348	214.888	2.778	0.024
Mean Crown Age.climate.stability	Landscape Ruggedness	Mean Crown Age ~ Prop. Range Size Sampled+Range Size+CS Annual Temp.+CS Temp. Seasonality+CS Annual Precip.+CS Precip. Seasonality+Elevation+Tarsus Length+Hand Wing Index+Migratory Distance	<0.001	0.347	215.095	2.986	0.022
Mean Crown Age.climate.stability	Prop. Range Size Sampled	Mean Crown Age ~ Range Size+CS Annual Temp.+CS Temp. Seasonality+CS Annual Precip.+CS Precip. Seasonality+Elevation+Tarsus Length+Hand Wing Index+Migratory Distance+Landscape Ruggedness	<0.001	0.34	217.748	5.639	0.006
Mean Crown Age.climate.stability	CS_bio_01	Mean Crown Age ~ Prop. Range Size Sampled+Range Size+CS Temp. Seasonality+CS Annual Precip.+CS Precip. Seasonality+Elevation+Tarsus Length+Hand Wing Index+Migratory Distance+Landscape Ruggedness	<0.001	0.309	226.248	14.138	0
Mean Crown Age.climate.stability	Range Size	Mean Crown Age ~ Prop. Range Size Sampled+CS Annual Temp.+CS Temp. Seasonality+CS Annual Precip.+CS Precip. Seasonality+Elevation+Tarsus Length+Hand Wing Index+Migratory Distance+Landscape Ruggedness	<0.001	0.19	258.138	46.028	0
Mean Crown Age.latitude	Tarsus Length	Mean Crown Age ~ Prop. Range Size Sampled+Range Size+Latitude Mid.+Elevation+Hand Wing Index+Migratory Distance+Landscape Ruggedness	<0.001	0.44	185.553	-2.154	0.236
Mean Crown Age.latitude	Elevation	Mean Crown Age ~ Prop. Range Size Sampled+Range Size+Latitude Mid.+Tarsus Length+Hand Wing Index+Migratory Distance+Landscape Ruggedness	<0.001	0.44	185.577	-2.129	0.233
Mean Crown Age.latitude	Migratory Distance	Mean Crown Age ~ Prop. Range Size Sampled+Range Size+Latitude Mid.+Elevation+Tarsus Length+Hand Wing Index+Landscape Ruggedness	<0.001	0.44	185.629	-2.078	0.227
Mean Crown Age.latitude	Landscape Ruggedness	Mean Crown Age ~ Prop. Range Size Sampled+Range Size+Latitude Mid.+Elevation+Tarsus Length+Hand Wing Index+Migratory Distance	<0.001	0.435	186.911	-0.796	0.12
Mean Crown Age.latitude	Full Model	Mean Crown Age ~ Prop. Range Size Sampled+Range Size+Latitude Mid.+Elevation+Tarsus Length+Hand Wing Index+Migratory Distance+Landscape Ruggedness	<0.001	0.437	187.707	0	0.08
Mean Crown Age.latitude	Hand Wing Index	Mean Crown Age ~ Prop. Range Size Sampled+Range Size+Latitude Mid.+Elevation+Tarsus Length+Migratory Distance+Landscape Ruggedness	<0.001	0.433	188.222	0.516	0.062
Mean Crown Age.latitude	Prop. Range Size Sampled	Mean Crown Age ~ Range Size+Latitude Mid.+Elevation+Tarsus Length+Hand Wing Index+Migratory Distance+Landscape Ruggedness	<0.001	0.43	189.076	1.37	0.041
Mean Crown Age.latitude	Range Size	Mean Crown Age ~ Prop. Range Size Sampled+Latitude Mid.+Elevation+Tarsus Length+Hand Wing Index+Migratory Distance+Landscape Ruggedness	<0.001	0.261	239.027	51.32	0
Mean Crown Age.latitude	Latitude Mid.	Mean Crown Age ~ Prop. Range Size Sampled+Range Size+Elevation+Tarsus Length+Hand Wing Index+Migratory Distance+Landscape Ruggedness	<0.001	0.236	240.694	52.987	0
Mean Crown Age.climate.breadth	RANGE.bio15	Mean Crown Age ~ Prop. Range Size Sampled+Range Size+Annual Temp. Range+Temp. Seasonality Range+Annual Precip.+Elevational Range+Tarsus Length+Hand Wing Index+Migratory Distance+Landscape Ruggedness	<0.001	0.432	190.225	-2.252	0.232
Mean Crown Age.climate.breadth	Tarsus Length	Mean Crown Age ~ Prop. Range Size Sampled+Range Size+Annual Temp. Range+Temp. Seasonality Range+Annual Precip.+Precip. Seasonality+Elevational Range+Hand Wing Index+Migratory Distance+Landscape Ruggedness	<0.001	0.432	190.533	-1.943	0.198
Mean Crown Age.climate.breadth	Elevation	Mean Crown Age ~ Prop. Range Size Sampled+Range Size+Annual Temp. Range+Temp. Seasonality Range+Annual Precip.+Precip. Seasonality+Tarsus Length+Hand Wing Index+Migratory Distance+Landscape Ruggedness	<0.001	0.429	191.207	-1.27	0.142
Mean Crown Age.climate.breadth	RANGE.bio1	Mean Crown Age ~ Prop. Range Size Sampled+Range Size+Temp. Seasonality Range+Annual Precip.+Precip. Seasonality+Elevational Range+Tarsus Length+Hand Wing Index+Migratory Distance+Landscape Ruggedness	<0.001	0.429	191.54	-0.936	0.12
Mean Crown Age.climate.breadth	Migratory Distance	Mean Crown Age ~ Prop. Range Size Sampled+Range Size+Annual Temp. Range+Temp. Seasonality Range+Annual Precip.+Precip. Seasonality+Elevational Range+Tarsus Length+Hand Wing Index+Landscape Ruggedness	<0.001	0.427	191.776	-0.7	0.107
Mean Crown Age.climate.breadth	RANGE.bio4	Mean Crown Age ~ Prop. Range Size Sampled+Range Size+Annual Temp. Range+Annual Precip.+Precip. Seasonality+Elevational Range+Tarsus Length+Hand Wing Index+Migratory Distance+Landscape Ruggedness	<0.001	0.424	192.476	0	0.075
Mean Crown Age.climate.breadth	Full Model	Mean Crown Age ~ Prop. Range Size Sampled+Range Size+Annual Temp. Range+Temp. Seasonality Range+Annual Precip.+Precip. Seasonality+Elevational Range+Tarsus Length+Hand Wing Index+Migratory Distance+Landscape Ruggedness	<0.001	0.43	192.477	0	0.075
Mean Crown Age.climate.breadth	Landscape Ruggedness	Mean Crown Age ~ Prop. Range Size Sampled+Range Size+Annual Temp. Range+Temp. Seasonality Range+Annual Precip.+Precip. Seasonality+Elevational Range+Tarsus Length+Hand Wing Index+Migratory Distance	<0.001	0.42	194.343	1.867	0.03
Mean Crown Age.climate.breadth	Hand Wing Index	Mean Crown Age ~ Prop. Range Size Sampled+Range Size+Annual Temp. Range+Temp. Seasonality Range+Annual Precip.+Precip. Seasonality+Elevational Range+Tarsus Length+Migratory Distance+Landscape Ruggedness	<0.001	0.411	196.255	3.778	0.011
Mean Crown Age.climate.breadth	Prop. Range Size Sampled	Mean Crown Age ~ Range Size+Annual Temp. Range+Temp. Seasonality Range+Annual Precip.+Precip. Seasonality+Elevational Range+Tarsus Length+Hand Wing Index+Migratory Distance+Landscape Ruggedness	<0.001	0.416	196.38	3.904	0.011
Mean Crown Age.climate.breadth	Range Size	Mean Crown Age ~ Prop. Range Size Sampled+Annual Temp. Range+Temp. Seasonality Range+Annual Precip.+Precip. Seasonality+Elevational Range+Tarsus Length+Hand Wing Index+Migratory Distance+Landscape Ruggedness	<0.001	0.312	226.681	34.204	0
Mean Crown Age.climate.breadth	RANGE.bio12	Mean Crown Age ~ Prop. Range Size Sampled+Range Size+Annual Temp. Range+Temp. Seasonality Range+Precip. Seasonality+Elevational Range+Tarsus Length+Hand Wing Index+Migratory Distance+Landscape Ruggedness	<0.001	0.302	228.832	36.356	0
Mean Crown Age.NPP	Tarsus Length	Mean Crown Age ~ Prop. Range Size Sampled+Range Size+NPP+Elevation+Hand Wing Index+Migratory Distance+Landscape Ruggedness	<0.001	0.396	198.767	-2.169	0.318
Mean Crown Age.NPP	Migratory Distance	Mean Crown Age ~ Prop. Range Size Sampled+Range Size+NPP+Elevation+Tarsus Length+Hand Wing Index+Landscape Ruggedness	<0.001	0.394	199.425	-1.511	0.229
Mean Crown Age.NPP	Elevation	Mean Crown Age ~ Prop. Range Size Sampled+Range Size+NPP+Tarsus Length+Hand Wing Index+Migratory Distance+Landscape Ruggedness	<0.001	0.392	199.964	-0.973	0.175
Mean Crown Age.NPP	Landscape Ruggedness	Mean Crown Age ~ Prop. Range Size Sampled+Range Size+NPP+Elevation+Tarsus Length+Hand Wing Index+Migratory Distance	<0.001	0.39	200.619	-0.317	0.126
Mean Crown Age.NPP	Full Model	Mean Crown Age ~ Prop. Range Size Sampled+Range Size+NPP+Elevation+Tarsus Length+Hand Wing Index+Migratory Distance+Landscape Ruggedness	<0.001	0.393	200.936	0	0.108
Mean Crown Age.NPP	Hand Wing Index	Mean Crown Age ~ Prop. Range Size Sampled+Range Size+NPP+Elevation+Tarsus Length+Migratory Distance+Landscape Ruggedness	<0.001	0.382	202.868	1.932	0.041
Mean Crown Age.NPP	Prop. Range Size Sampled	Mean Crown Age ~ Range Size+NPP+Elevation+Tarsus Length+Hand Wing Index+Migratory Distance+Landscape Ruggedness	<0.001	0.368	207.664	6.728	0.004
Mean Crown Age.NPP	Range Size	Mean Crown Age ~ Prop. Range Size Sampled+NPP+Elevation+Tarsus Length+Hand Wing Index+Migratory Distance+Landscape Ruggedness	<0.001	0.26	238.507	37.571	0
Mean Crown Age.NPP	NPP	Mean Crown Age ~ Prop. Range Size Sampled+Range Size+Elevation+Tarsus Length+Hand Wing Index+Migratory Distance+Landscape Ruggedness	<0.001	0.236	240.694	39.757	0
Mean Crown Age.pc1	Tarsus Length	Mean Crown Age ~ Prop. Range Size Sampled+Range Size+Bioclim PC1+Elevation+Hand Wing Index+Migratory Distance+Landscape Ruggedness	<0.001	0.427	189.231	-2.172	0.547
Mean Crown Age.pc1	Full Model	Mean Crown Age ~ Prop. Range Size Sampled+Range Size+Bioclim PC1+Elevation+Tarsus Length+Hand Wing Index+Migratory Distance+Landscape Ruggedness	<0.001	0.424	191.403	0	0.185
Mean Crown Age.pc1	Landscape Ruggedness	Mean Crown Age ~ Prop. Range Size Sampled+Range Size+Bioclim PC1+Elevation+Tarsus Length+Hand Wing Index+Migratory Distance	<0.001	0.417	192.294	0.89	0.118
Mean Crown Age.pc1	Hand Wing Index	Mean Crown Age ~ Prop. Range Size Sampled+Range Size+Bioclim PC1+Elevation+Tarsus Length+Migratory Distance+Landscape Ruggedness	<0.001	0.414	193.264	1.861	0.073
Mean Crown Age.pc1	Migratory Distance	Mean Crown Age ~ Prop. Range Size Sampled+Range Size+Bioclim PC1+Elevation+Tarsus Length+Hand Wing Index+Landscape Ruggedness	<0.001	0.411	193.752	2.349	0.057
Mean Crown Age.pc1	Prop. Range Size Sampled	Mean Crown Age ~ Range Size+Bioclim PC1+Elevation+Tarsus Length+Hand Wing Index+Migratory Distance+Landscape Ruggedness	<0.001	0.404	196.758	5.354	0.013
Mean Crown Age.pc1	Elevation	Mean Crown Age ~ Prop. Range Size Sampled+Range Size+Bioclim PC1+Tarsus Length+Hand Wing Index+Migratory Distance+Landscape Ruggedness	<0.001	0.399	197.846	6.442	0.007
Mean Crown Age.pc1	Bioclim PC1	Mean Crown Age ~ Prop. Range Size Sampled+Range Size+Elevation+Tarsus Length+Hand Wing Index+Migratory Distance+Landscape Ruggedness	<0.001	0.236	240.694	49.29	0
Mean Crown Age.pc1	Range Size	Mean Crown Age ~ Prop. Range Size Sampled+Bioclim PC1+Elevation+Tarsus Length+Hand Wing Index+Migratory Distance+Landscape Ruggedness	<0.001	0.207	251.984	60.581	0
crown.rate.climate.breadth	RANGE.bio15	Crown Splitting Rate (0.9) ~ Prop. Range Size Sampled+Range Size+Annual Temp. Range+Temp. Seasonality Range+Annual Precip.+Elevational Range+Tarsus Length+Hand Wing Index+Migratory Distance+Landscape Ruggedness	0.122	0.026	252.551	-2.235	0.137
crown.rate.climate.breadth	Hand Wing Index	Crown Splitting Rate (0.9) ~ Prop. Range Size Sampled+Range Size+Annual Temp. Range+Temp. Seasonality Range+Annual Precip.+Precip. Seasonality+Elevational Range+Tarsus Length+Migratory Distance+Landscape Ruggedness	0.124	0.026	252.58	-2.206	0.135
crown.rate.climate.breadth	RANGE.bio4	Crown Splitting Rate (0.9) ~ Prop. Range Size Sampled+Range Size+Annual Temp. Range+Annual Precip.+Precip. Seasonality+Elevational Range+Tarsus Length+Hand Wing Index+Migratory Distance+Landscape Ruggedness	0.126	0.025	252.642	-2.144	0.131
crown.rate.climate.breadth	Migratory Distance	Crown Splitting Rate (0.9) ~ Prop. Range Size Sampled+Range Size+Annual Temp. Range+Temp. Seasonality Range+Annual Precip.+Precip. Seasonality+Elevational Range+Tarsus Length+Hand Wing Index+Landscape Ruggedness	0.135	0.024	252.904	-1.882	0.115
crown.rate.climate.breadth	Landscape Ruggedness	Crown Splitting Rate (0.9) ~ Prop. Range Size Sampled+Range Size+Annual Temp. Range+Temp. Seasonality Range+Annual Precip.+Precip. Seasonality+Elevational Range+Tarsus Length+Hand Wing Index+Migratory Distance	0.135	0.024	252.936	-1.85	0.113
crown.rate.climate.breadth	Range Size	Crown Splitting Rate (0.9) ~ Prop. Range Size Sampled+Annual Temp. Range+Temp. Seasonality Range+Annual Precip.+Precip. Seasonality+Elevational Range+Tarsus Length+Hand Wing Index+Migratory Distance+Landscape Ruggedness	0.148	0.023	253.253	-1.533	0.096
crown.rate.climate.breadth	RANGE.bio12	Crown Splitting Rate (0.9) ~ Prop. Range Size Sampled+Range Size+Annual Temp. Range+Temp. Seasonality Range+Precip. Seasonality+Elevational Range+Tarsus Length+Hand Wing Index+Migratory Distance+Landscape Ruggedness	0.157	0.022	253.491	-1.295	0.086
crown.rate.climate.breadth	Elevation	Crown Splitting Rate (0.9) ~ Prop. Range Size Sampled+Range Size+Annual Temp. Range+Temp. Seasonality Range+Annual Precip.+Precip. Seasonality+Tarsus Length+Hand Wing Index+Migratory Distance+Landscape Ruggedness	0.171	0.02	253.798	-0.988	0.073
crown.rate.climate.breadth	Full Model	Crown Splitting Rate (0.9) ~ Prop. Range Size Sampled+Range Size+Annual Temp. Range+Temp. Seasonality Range+Annual Precip.+Precip. Seasonality+Elevational Range+Tarsus Length+Hand Wing Index+Migratory Distance+Landscape Ruggedness	0.171	0.021	254.786	0	0.045
crown.rate.climate.breadth	RANGE.bio1	Crown Splitting Rate (0.9) ~ Prop. Range Size Sampled+Range Size+Temp. Seasonality Range+Annual Precip.+Precip. Seasonality+Elevational Range+Tarsus Length+Hand Wing Index+Migratory Distance+Landscape Ruggedness	0.234	0.014	255.068	0.282	0.039
crown.rate.climate.breadth	Tarsus Length	Crown Splitting Rate (0.9) ~ Prop. Range Size Sampled+Range Size+Annual Temp. Range+Temp. Seasonality Range+Annual Precip.+Precip. Seasonality+Elevational Range+Hand Wing Index+Migratory Distance+Landscape Ruggedness	0.274	0.011	255.812	1.026	0.027
crown.rate.climate.breadth	Prop. Range Size Sampled	Crown Splitting Rate (0.9) ~ Range Size+Annual Temp. Range+Temp. Seasonality Range+Annual Precip.+Precip. Seasonality+Elevational Range+Tarsus Length+Hand Wing Index+Migratory Distance+Landscape Ruggedness	0.608	-0.009	260.065	5.279	0.003
crown.rate.climate.stability	Landscape Ruggedness	Crown Splitting Rate (0.9) ~ Prop. Range Size Sampled+Range Size+CS Annual Temp.+CS Temp. Seasonality+CS Annual Precip.+CS Precip. Seasonality+Elevation+Tarsus Length+Hand Wing Index+Migratory Distance	0.092	0.031	252.055	-2.241	0.135
crown.rate.climate.stability	Hand Wing Index	Crown Splitting Rate (0.9) ~ Prop. Range Size Sampled+Range Size+CS Annual Temp.+CS Temp. Seasonality+CS Annual Precip.+CS Precip. Seasonality+Elevation+Tarsus Length+Migratory Distance+Landscape Ruggedness	0.09	0.031	252.061	-2.235	0.135
crown.rate.climate.stability	CS_bio_15	Crown Splitting Rate (0.9) ~ Prop. Range Size Sampled+Range Size+CS Annual Temp.+CS Temp. Seasonality+CS Annual Precip.+Elevation+Tarsus Length+Hand Wing Index+Migratory Distance+Landscape Ruggedness	0.095	0.03	252.076	-2.22	0.134
crown.rate.climate.stability	CS_bio_12	Crown Splitting Rate (0.9) ~ Prop. Range Size Sampled+Range Size+CS Annual Temp.+CS Temp. Seasonality+CS Precip. Seasonality+Elevation+Tarsus Length+Hand Wing Index+Migratory Distance+Landscape Ruggedness	0.096	0.03	252.125	-2.171	0.13
crown.rate.climate.stability	Migratory Distance	Crown Splitting Rate (0.9) ~ Prop. Range Size Sampled+Range Size+CS Annual Temp.+CS Temp. Seasonality+CS Annual Precip.+CS Precip. Seasonality+Elevation+Tarsus Length+Hand Wing Index+Landscape Ruggedness	0.073	0.035	252.514	-1.783	0.107
crown.rate.climate.stability	RANGE.bio4	Crown Splitting Rate (0.9) ~ Prop. Range Size Sampled+Range Size+CS Annual Temp.+CS Annual Precip.+CS Precip. Seasonality+Elevation+Tarsus Length+Hand Wing Index+Migratory Distance+Landscape Ruggedness	0.11	0.028	252.559	-1.737	0.105
crown.rate.climate.stability	CS_bio_01	Crown Splitting Rate (0.9) ~ Prop. Range Size Sampled+Range Size+CS Temp. Seasonality+CS Annual Precip.+CS Precip. Seasonality+Elevation+Tarsus Length+Hand Wing Index+Migratory Distance+Landscape Ruggedness	0.14	0.024	253.321	-0.975	0.072
crown.rate.climate.stability	Elevation	Crown Splitting Rate (0.9) ~ Prop. Range Size Sampled+Range Size+CS Annual Temp.+CS Temp. Seasonality+CS Annual Precip.+CS Precip. Seasonality+Tarsus Length+Hand Wing Index+Migratory Distance+Landscape Ruggedness	0.16	0.021	253.832	-0.465	0.056
crown.rate.climate.stability	Tarsus Length	Crown Splitting Rate (0.9) ~ Prop. Range Size Sampled+Range Size+CS Annual Temp.+CS Temp. Seasonality+CS Annual Precip.+CS Precip. Seasonality+Elevation+Hand Wing Index+Migratory Distance+Landscape Ruggedness	0.112	0.028	254.03	-0.267	0.05
crown.rate.climate.stability	Full Model	Crown Splitting Rate (0.9) ~ Prop. Range Size Sampled+Range Size+CS Annual Temp.+CS Temp. Seasonality+CS Annual Precip.+CS Precip. Seasonality+Elevation+Tarsus Length+Hand Wing Index+Migratory Distance+Landscape Ruggedness	0.133	0.026	254.296	0	0.044
crown.rate.climate.stability	Range Size	Crown Splitting Rate (0.9) ~ Prop. Range Size Sampled+CS Annual Temp.+CS Temp. Seasonality+CS Annual Precip.+CS Precip. Seasonality+Elevation+Tarsus Length+Hand Wing Index+Migratory Distance+Landscape Ruggedness	0.148	0.023	255.092	0.796	0.03
crown.rate.climate.stability	Prop. Range Size Sampled	Crown Splitting Rate (0.9) ~ Range Size+CS Annual Temp.+CS Temp. Seasonality+CS Annual Precip.+CS Precip. Seasonality+Elevation+Tarsus Length+Hand Wing Index+Migratory Distance+Landscape Ruggedness	0.558	-0.006	259.483	5.187	0.003
crown.rate.lat	Migratory Distance	Crown Splitting Rate (0.9) ~ Prop. Range Size Sampled+Range Size+Latitude Mid.+Elevation+Tarsus Length+Hand Wing Index+Landscape Ruggedness	0.04	0.037	246.958	-2.15	0.2
crown.rate.lat	Hand Wing Index	Crown Splitting Rate (0.9) ~ Prop. Range Size Sampled+Range Size+Latitude Mid.+Elevation+Tarsus Length+Migratory Distance+Landscape Ruggedness	0.04	0.037	246.958	-2.149	0.2
crown.rate.lat	Landscape Ruggedness	Crown Splitting Rate (0.9) ~ Prop. Range Size Sampled+Range Size+Latitude Mid.+Elevation+Tarsus Length+Hand Wing Index+Migratory Distance	0.043	0.036	247.037	-2.071	0.192
crown.rate.lat	Latitude Mid.	Crown Splitting Rate (0.9) ~ Prop. Range Size Sampled+Range Size+Elevation+Tarsus Length+Hand Wing Index+Migratory Distance+Landscape Ruggedness	0.066	0.03	248.188	-0.919	0.108
crown.rate.lat	Tarsus Length	Crown Splitting Rate (0.9) ~ Prop. Range Size Sampled+Range Size+Latitude Mid.+Elevation+Hand Wing Index+Migratory Distance+Landscape Ruggedness	0.076	0.028	248.804	-0.304	0.079
crown.rate.lat	Elevation	Crown Splitting Rate (0.9) ~ Prop. Range Size Sampled+Range Size+Latitude Mid.+Tarsus Length+Hand Wing Index+Migratory Distance+Landscape Ruggedness	0.081	0.028	248.842	-0.266	0.078
crown.rate.lat	Full Model	Crown Splitting Rate (0.9) ~ Prop. Range Size Sampled+Range Size+Latitude Mid.+Elevation+Tarsus Length+Hand Wing Index+Migratory Distance+Landscape Ruggedness	0.067	0.032	249.108	0	0.068
crown.rate.lat	Range Size	Crown Splitting Rate (0.9) ~ Prop. Range Size Sampled+Latitude Mid.+Elevation+Tarsus Length+Hand Wing Index+Migratory Distance+Landscape Ruggedness	0.079	0.028	249.144	0.036	0.067
crown.rate.lat	Prop. Range Size Sampled	Crown Splitting Rate (0.9) ~ Range Size+Latitude Mid.+Elevation+Tarsus Length+Hand Wing Index+Migratory Distance+Landscape Ruggedness	0.338	0.005	253.693	4.585	0.007
crown.rate.NPP	Hand Wing Index	Crown Splitting Rate (0.9) ~ Prop. Range Size Sampled+Range Size+NPP+Elevation+Tarsus Length+Migratory Distance+Landscape Ruggedness	0.019	0.047	246.296	-2.159	0.206
crown.rate.NPP	Migratory Distance	Crown Splitting Rate (0.9) ~ Prop. Range Size Sampled+Range Size+NPP+Elevation+Tarsus Length+Hand Wing Index+Landscape Ruggedness	0.02	0.047	246.415	-2.04	0.194
crown.rate.NPP	Landscape Ruggedness	Crown Splitting Rate (0.9) ~ Prop. Range Size Sampled+Range Size+NPP+Elevation+Tarsus Length+Hand Wing Index+Migratory Distance	0.02	0.046	246.47	-1.986	0.189
crown.rate.NPP	Range Size	Crown Splitting Rate (0.9) ~ Prop. Range Size Sampled+NPP+Elevation+Tarsus Length+Hand Wing Index+Migratory Distance+Landscape Ruggedness	0.03	0.041	247.602	-0.853	0.107
crown.rate.NPP	NPP	Crown Splitting Rate (0.9) ~ Prop. Range Size Sampled+Range Size+Elevation+Tarsus Length+Hand Wing Index+Migratory Distance+Landscape Ruggedness	0.068	0.03	247.956	-0.5	0.09
crown.rate.NPP	Elevation	Crown Splitting Rate (0.9) ~ Prop. Range Size Sampled+Range Size+NPP+Tarsus Length+Hand Wing Index+Migratory Distance+Landscape Ruggedness	0.076	0.029	248.393	-0.062	0.072
crown.rate.NPP	Full Model	Crown Splitting Rate (0.9) ~ Prop. Range Size Sampled+Range Size+NPP+Elevation+Tarsus Length+Hand Wing Index+Migratory Distance+Landscape Ruggedness	0.032	0.043	248.455	0	0.07
crown.rate.NPP	Tarsus Length	Crown Splitting Rate (0.9) ~ Prop. Range Size Sampled+Range Size+NPP+Elevation+Hand Wing Index+Migratory Distance+Landscape Ruggedness	0.041	0.037	248.512	0.057	0.068
crown.rate.NPP	Prop. Range Size Sampled	Crown Splitting Rate (0.9) ~ Range Size+NPP+Elevation+Tarsus Length+Hand Wing Index+Migratory Distance+Landscape Ruggedness	0.399	0.002	254.027	5.572	0.004
crown.rate.pc1	Hand Wing Index	Crown Splitting Rate (0.9) ~ Prop. Range Size Sampled+Range Size+Bioclim PC1+Elevation+Tarsus Length+Migratory Distance+Landscape Ruggedness	0.048	0.035	247.531	-2.153	0.198
crown.rate.pc1	Landscape Ruggedness	Crown Splitting Rate (0.9) ~ Prop. Range Size Sampled+Range Size+Bioclim PC1+Elevation+Tarsus Length+Hand Wing Index+Migratory Distance	0.05	0.034	247.552	-2.132	0.196
crown.rate.pc1	Migratory Distance	Crown Splitting Rate (0.9) ~ Prop. Range Size Sampled+Range Size+Bioclim PC1+Elevation+Tarsus Length+Hand Wing Index+Landscape Ruggedness	0.05	0.034	247.577	-2.107	0.194
crown.rate.pc1	Bioclim PC1	Crown Splitting Rate (0.9) ~ Prop. Range Size Sampled+Range Size+Elevation+Tarsus Length+Hand Wing Index+Migratory Distance+Landscape Ruggedness	0.065	0.031	248.23	-1.454	0.14
crown.rate.pc1	Tarsus Length	Crown Splitting Rate (0.9) ~ Prop. Range Size Sampled+Range Size+Bioclim PC1+Elevation+Hand Wing Index+Migratory Distance+Landscape Ruggedness	0.087	0.027	249.246	-0.438	0.084
crown.rate.pc1	Full Model	Crown Splitting Rate (0.9) ~ Prop. Range Size Sampled+Range Size+Bioclim PC1+Elevation+Tarsus Length+Hand Wing Index+Migratory Distance+Landscape Ruggedness	0.079	0.03	249.684	0	0.067
crown.rate.pc1	Elevation	Crown Splitting Rate (0.9) ~ Prop. Range Size Sampled+Range Size+Bioclim PC1+Tarsus Length+Hand Wing Index+Migratory Distance+Landscape Ruggedness	0.114	0.023	249.973	0.289	0.058
crown.rate.pc1	Range Size	Crown Splitting Rate (0.9) ~ Prop. Range Size Sampled+Bioclim PC1+Elevation+Tarsus Length+Hand Wing Index+Migratory Distance+Landscape Ruggedness	0.107	0.024	249.991	0.308	0.058
crown.rate.pc1	Prop. Range Size Sampled	Crown Splitting Rate (0.9) ~ Range Size+Bioclim PC1+Elevation+Tarsus Length+Hand Wing Index+Migratory Distance+Landscape Ruggedness	0.448	-0.001	254.884	5.201	0.005
phylog.struct.crown.climate.breadth	RANGE.bio4	Phylogeographic Structure (0.9) ~ Mean Crown Age+Prop. Range Size Sampled+Range Size+Annual Temp. Range+Annual Precip.+Precip. Seasonality+Elevational Range+Tarsus Length+Hand Wing Index+Migratory Distance+Landscape Ruggedness	<0.001	0.42	294.592	-2.261	0.111
phylog.struct.crown.climate.breadth	Migratory Distance	Phylogeographic Structure (0.9) ~ Mean Crown Age+Prop. Range Size Sampled+Range Size+Annual Temp. Range+Temp. Seasonality Range+Annual Precip.+Precip. Seasonality+Elevational Range+Tarsus Length+Hand Wing Index+Landscape Ruggedness	<0.001	0.419	294.697	-2.156	0.106
phylog.struct.crown.climate.breadth	Hand Wing Index	Phylogeographic Structure (0.9) ~ Mean Crown Age+Prop. Range Size Sampled+Range Size+Annual Temp. Range+Temp. Seasonality Range+Annual Precip.+Precip. Seasonality+Elevational Range+Tarsus Length+Migratory Distance+Landscape Ruggedness	<0.001	0.419	294.722	-2.131	0.104
phylog.struct.crown.climate.breadth	RANGE.bio12	Phylogeographic Structure (0.9) ~ Mean Crown Age+Prop. Range Size Sampled+Range Size+Annual Temp. Range+Temp. Seasonality Range+Precip. Seasonality+Elevational Range+Tarsus Length+Hand Wing Index+Migratory Distance+Landscape Ruggedness	<0.001	0.419	294.757	-2.096	0.102
phylog.struct.crown.climate.breadth	RANGE.bio15	Phylogeographic Structure (0.9) ~ Mean Crown Age+Prop. Range Size Sampled+Range Size+Annual Temp. Range+Temp. Seasonality Range+Annual Precip.+Elevational Range+Tarsus Length+Hand Wing Index+Migratory Distance+Landscape Ruggedness	<0.001	0.419	294.783	-2.071	0.101
phylog.struct.crown.climate.breadth	Range Size	Phylogeographic Structure (0.9) ~ Mean Crown Age+Prop. Range Size Sampled+Annual Temp. Range+Temp. Seasonality Range+Annual Precip.+Precip. Seasonality+Elevational Range+Tarsus Length+Hand Wing Index+Migratory Distance+Landscape Ruggedness	<0.001	0.419	294.788	-2.065	0.101
phylog.struct.crown.climate.breadth	Landscape Ruggedness	Phylogeographic Structure (0.9) ~ Mean Crown Age+Prop. Range Size Sampled+Range Size+Annual Temp. Range+Temp. Seasonality Range+Annual Precip.+Precip. Seasonality+Elevational Range+Tarsus Length+Hand Wing Index+Migratory Distance	<0.001	0.419	294.881	-1.972	0.096
phylog.struct.crown.climate.breadth	Elevation	Phylogeographic Structure (0.9) ~ Mean Crown Age+Prop. Range Size Sampled+Range Size+Annual Temp. Range+Temp. Seasonality Range+Annual Precip.+Precip. Seasonality+Tarsus Length+Hand Wing Index+Migratory Distance+Landscape Ruggedness	<0.001	0.418	295.067	-1.787	0.088
phylog.struct.crown.climate.breadth	Tarsus Length	Phylogeographic Structure (0.9) ~ Mean Crown Age+Prop. Range Size Sampled+Range Size+Annual Temp. Range+Temp. Seasonality Range+Annual Precip.+Precip. Seasonality+Elevational Range+Hand Wing Index+Migratory Distance+Landscape Ruggedness	<0.001	0.418	295.279	-1.574	0.079
phylog.struct.crown.climate.breadth	RANGE.bio1	Phylogeographic Structure (0.9) ~ Mean Crown Age+Prop. Range Size Sampled+Range Size+Temp. Seasonality Range+Annual Precip.+Precip. Seasonality+Elevational Range+Tarsus Length+Hand Wing Index+Migratory Distance+Landscape Ruggedness	<0.001	0.417	295.451	-1.403	0.072
phylog.struct.crown.climate.breadth	Full Model	Phylogeographic Structure (0.9) ~ Mean Crown Age+Prop. Range Size Sampled+Range Size+Annual Temp. Range+Temp. Seasonality Range+Annual Precip.+Precip. Seasonality+Elevational Range+Tarsus Length+Hand Wing Index+Migratory Distance+Landscape Ruggedness	<0.001	0.417	296.853	0	0.036
phylog.struct.crown.climate.breadth	Prop. Range Size Sampled	Phylogeographic Structure (0.9) ~ Mean Crown Age+Range Size+Annual Temp. Range+Temp. Seasonality Range+Annual Precip.+Precip. Seasonality+Elevational Range+Tarsus Length+Hand Wing Index+Migratory Distance+Landscape Ruggedness	<0.001	0.4	301.445	4.591	0.004
phylog.struct.crown.climate.breadth	Age	Phylogeographic Structure (0.9) ~ Prop. Range Size Sampled+Range Size+Annual Temp. Range+Temp. Seasonality Range+Annual Precip.+Precip. Seasonality+Elevational Range+Tarsus Length+Hand Wing Index+Migratory Distance+Landscape Ruggedness	<0.001	0.202	361.132	64.278	0
phylog.struct.crown.climate.stability	Hand Wing Index	Phylogeographic Structure (0.9) ~ Mean Crown Age+Prop. Range Size Sampled+Range Size+CS Annual Temp.+CS Temp. Seasonality+CS Annual Precip.+CS Precip. Seasonality+Elevation+Tarsus Length+Migratory Distance+Landscape Ruggedness	<0.001	0.427	291.905	-2.222	0.12
phylog.struct.crown.climate.stability	CS_bio_01	Phylogeographic Structure (0.9) ~ Mean Crown Age+Prop. Range Size Sampled+Range Size+CS Temp. Seasonality+CS Annual Precip.+CS Precip. Seasonality+Elevation+Tarsus Length+Hand Wing Index+Migratory Distance+Landscape Ruggedness	<0.001	0.427	291.964	-2.163	0.116
phylog.struct.crown.climate.stability	Landscape Ruggedness	Phylogeographic Structure (0.9) ~ Mean Crown Age+Prop. Range Size Sampled+Range Size+CS Annual Temp.+CS Temp. Seasonality+CS Annual Precip.+CS Precip. Seasonality+Elevation+Tarsus Length+Hand Wing Index+Migratory Distance	<0.001	0.427	291.967	-2.16	0.116
phylog.struct.crown.climate.stability	CS_bio_15	Phylogeographic Structure (0.9) ~ Mean Crown Age+Prop. Range Size Sampled+Range Size+CS Annual Temp.+CS Temp. Seasonality+CS Annual Precip.+Elevation+Tarsus Length+Hand Wing Index+Migratory Distance+Landscape Ruggedness	<0.001	0.427	291.97	-2.157	0.116
phylog.struct.crown.climate.stability	Migratory Distance	Phylogeographic Structure (0.9) ~ Mean Crown Age+Prop. Range Size Sampled+Range Size+CS Annual Temp.+CS Temp. Seasonality+CS Annual Precip.+CS Precip. Seasonality+Elevation+Tarsus Length+Hand Wing Index+Landscape Ruggedness	<0.001	0.427	291.977	-2.15	0.116
phylog.struct.crown.climate.stability	CS_bio_12	Phylogeographic Structure (0.9) ~ Mean Crown Age+Prop. Range Size Sampled+Range Size+CS Annual Temp.+CS Temp. Seasonality+CS Precip. Seasonality+Elevation+Tarsus Length+Hand Wing Index+Migratory Distance+Landscape Ruggedness	<0.001	0.427	292.098	-2.03	0.109
phylog.struct.crown.climate.stability	Tarsus Length	Phylogeographic Structure (0.9) ~ Mean Crown Age+Prop. Range Size Sampled+Range Size+CS Annual Temp.+CS Temp. Seasonality+CS Annual Precip.+CS Precip. Seasonality+Elevation+Hand Wing Index+Migratory Distance+Landscape Ruggedness	<0.001	0.426	292.17	-1.957	0.105
phylog.struct.crown.climate.stability	CS_bio_04	Phylogeographic Structure (0.9) ~ Mean Crown Age+Prop. Range Size Sampled+Range Size+CS Annual Temp.+CS Annual Precip.+CS Precip. Seasonality+Elevation+Tarsus Length+Hand Wing Index+Migratory Distance+Landscape Ruggedness	<0.001	0.425	292.749	-1.379	0.079
phylog.struct.crown.climate.stability	Range Size	Phylogeographic Structure (0.9) ~ Mean Crown Age+Prop. Range Size Sampled+CS Annual Temp.+CS Temp. Seasonality+CS Annual Precip.+CS Precip. Seasonality+Elevation+Tarsus Length+Hand Wing Index+Migratory Distance+Landscape Ruggedness	<0.001	0.423	293.498	-0.629	0.054
phylog.struct.crown.climate.stability	Full Model	Phylogeographic Structure (0.9) ~ Mean Crown Age+Prop. Range Size Sampled+Range Size+CS Annual Temp.+CS Temp. Seasonality+CS Annual Precip.+CS Precip. Seasonality+Elevation+Tarsus Length+Hand Wing Index+Migratory Distance+Landscape Ruggedness	<0.001	0.424	294.127	0	0.039
phylog.struct.crown.climate.stability	Elevation	Phylogeographic Structure (0.9) ~ Mean Crown Age+Prop. Range Size Sampled+Range Size+CS Annual Temp.+CS Temp. Seasonality+CS Annual Precip.+CS Precip. Seasonality+Tarsus Length+Hand Wing Index+Migratory Distance+Landscape Ruggedness	<0.001	0.419	294.955	0.828	0.026
phylog.struct.crown.climate.stability	Prop. Range Size Sampled	Phylogeographic Structure (0.9) ~ Mean Crown Age+Range Size+CS Annual Temp.+CS Temp. Seasonality+CS Annual Precip.+CS Precip. Seasonality+Elevation+Tarsus Length+Hand Wing Index+Migratory Distance+Landscape Ruggedness	<0.001	0.408	298.691	4.564	0.004
phylog.struct.crown.climate.stability	Age	Phylogeographic Structure (0.9) ~ Prop. Range Size Sampled+Range Size+CS Annual Temp.+CS Temp. Seasonality+CS Annual Precip.+CS Precip. Seasonality+Elevation+Tarsus Length+Hand Wing Index+Migratory Distance+Landscape Ruggedness	<0.001	0.203	360.845	66.718	0
phylog.struct.crown.lat	Hand Wing Index	Phylogeographic Structure (0.9) ~ Mean Crown Age+Prop. Range Size Sampled+Range Size+Latitude Mid.+Elevation+Tarsus Length+Migratory Distance+Landscape Ruggedness	<0.001	0.434	285.938	-2.075	0.178
phylog.struct.crown.lat	Landscape Ruggedness	Phylogeographic Structure (0.9) ~ Mean Crown Age+Prop. Range Size Sampled+Range Size+Latitude Mid.+Elevation+Tarsus Length+Hand Wing Index+Migratory Distance	<0.001	0.434	285.991	-2.022	0.173
phylog.struct.crown.lat	Tarsus Length	Phylogeographic Structure (0.9) ~ Mean Crown Age+Prop. Range Size Sampled+Range Size+Latitude Mid.+Elevation+Hand Wing Index+Migratory Distance+Landscape Ruggedness	<0.001	0.433	286.081	-1.932	0.166
phylog.struct.crown.lat	Migratory Distance	Phylogeographic Structure (0.9) ~ Mean Crown Age+Prop. Range Size Sampled+Range Size+Latitude Mid.+Elevation+Tarsus Length+Hand Wing Index+Landscape Ruggedness	<0.001	0.433	286.27	-1.743	0.151
phylog.struct.crown.lat	Latitude Mid.	Phylogeographic Structure (0.9) ~ Mean Crown Age+Prop. Range Size Sampled+Range Size+Elevation+Tarsus Length+Hand Wing Index+Migratory Distance+Landscape Ruggedness	<0.001	0.431	286.761	-1.252	0.118
phylog.struct.crown.lat	Range Size	Phylogeographic Structure (0.9) ~ Mean Crown Age+Prop. Range Size Sampled+Latitude Mid.+Elevation+Tarsus Length+Hand Wing Index+Migratory Distance+Landscape Ruggedness	<0.001	0.431	287.072	-0.94	0.101
phylog.struct.crown.lat	Full Model	Phylogeographic Structure (0.9) ~ Mean Crown Age+Prop. Range Size Sampled+Range Size+Latitude Mid.+Elevation+Tarsus Length+Hand Wing Index+Migratory Distance+Landscape Ruggedness	<0.001	0.431	288.013	0	0.063
phylog.struct.crown.lat	Elevation	Phylogeographic Structure (0.9) ~ Mean Crown Age+Prop. Range Size Sampled+Range Size+Latitude Mid.+Tarsus Length+Hand Wing Index+Migratory Distance+Landscape Ruggedness	<0.001	0.426	288.677	0.665	0.045
phylog.struct.crown.lat	Prop. Range Size Sampled	Phylogeographic Structure (0.9) ~ Mean Crown Age+Range Size+Latitude Mid.+Elevation+Tarsus Length+Hand Wing Index+Migratory Distance+Landscape Ruggedness	<0.001	0.415	292.701	4.689	0.006
phylog.struct.crown.lat	Age	Phylogeographic Structure (0.9) ~ Prop. Range Size Sampled+Range Size+Latitude Mid.+Elevation+Tarsus Length+Hand Wing Index+Migratory Distance+Landscape Ruggedness	<0.001	0.219	353.187	65.174	0
[truncated: 229 more rows]

[truncated: 4 more sheets: AOU Passerines - Model Summaries, AOU Quantile - Model Summaries, Lumped, Univariate Null Models]
