# Supplementary material for: A latitudinal phylogeographic diversity gradient in birds
Source: PLoS Biol. 2017 Apr 13;15(4):e2001073. doi: 10.1371/journal.pbio.2001073 (PMC5390966; doi:10.1371/journal.pbio.2001073)
Supplement: S7 Table — These data values were used to produce the histograms in S2–S5 Figs. (XLSX) [file pbio.2001073.s014.xlsx]

## Sheet: Phylogeo Struct -  Null Model R2
univariate.null.model	sqrt(Ngroups0.9)~abs.lat.mid	sqrt(Ngroups0.9)~elevation	sqrt(Ngroups0.9)~sqrt(stem.age)	sqrt(Ngroups0.9)~prop.range.sampled	sqrt(Ngroups0.9)~sqrt(migdist6)	sqrt(Ngroups0.9)~sqrt(MeanHandWingIndex)	sqrt(Ngroups0.9)~MeanTarsus	sqrt(Ngroups0.9)~sqrt(crown.age)	sqrt(Ngroups0.9)~sqrt(range.size)
R2.1	0.0081	-0.0045	-0.0001	-0.0038	0	0.0275	-0.0007	0.0041	-0.0016
R2.2	-0.0016	-0.0036	-0.0041	0.012	0.0024	0.0046	-0.0017	-0.0018	-0.0029
R2.3	-0.0041	0.0086	-0.0028	0.0218	-0.0043	-0.0046	0.01	0.0152	0.0024
R2.4	0.0034	0.0019	-0.0044	-0.0046	-0.0021	-0.0007	-0.0045	-0.0027	-0.0043
R2.5	-0.0042	0.0017	-0.0019	0.0092	-0.0029	0.0132	0.0205	0.0001	-0.0044
R2.6	-0.0028	-0.0035	0.0056	-0.0026	-0.0018	0.0006	-0.0039	0.014	-0.0028
R2.7	0.0557	0.0055	0.0076	-0.0046	-0.0038	0.0053	0.002	0.0084	-0.0012
R2.8	-0.0025	-0.0012	-0.0017	0.0051	-0.0038	-0.0043	0.0122	-0.0043	-0.0045
R2.9	-0.0038	-0.0014	0.014	-0.0043	-0.0007	-0.002	0.0082	0.0001	-0.0017
R2.10	-0.0017	0.0013	-0.0025	-0.0046	-0.0046	-0.0034	-0.0039	-0.0021	-0.0046
R2.11	0.0089	-0.0038	-0.0033	-0.0046	-0.0047	0.0053	-0.0008	0.0124	-0.0013
R2.12	-0.0034	0.0024	-0.0027	-0.0036	-0.002	-0.0006	0.0206	-0.0029	-0.0005
R2.13	-0.0042	-0.0036	-0.004	-0.0039	-0.0042	-0.0033	0.0024	-0.0015	0.0034
R2.14	-0.0043	0.0168	0.0083	-0.0037	-0.0018	-0.003	0.0005	-0.0024	0.0244
R2.15	-0.0043	-0.0021	-0.0046	0.0026	0.0017	-0.0037	-0.0038	-0.0012	0.0042
R2.16	0.0018	-0.0039	-0.0041	0.0237	-0.0034	-0.0031	0.0082	-0.0044	-0.0043
R2.17	-0.0008	-0.0041	-0.0028	-0.0038	0.012	-0.0046	-0.0046	-0.0025	-0.0034
R2.18	0.0089	-0.0017	0.0122	0.0104	-0.0046	-0.0042	-0.0026	0.0108	-0.0027
R2.19	0.0024	-0.0046	-0.003	0.0003	0.017	-0.0041	-0.0028	-0.0045	-0.0044
R2.20	-0.0047	-0.0046	-0.0032	0.0006	-0.0042	-0.0043	0.0041	-0.0013	-0.0042
R2.21	-0.0038	-0.0018	-0.0018	0.004	-0.0023	-0.001	0.0175	-0.0046	0.0027
R2.22	-0.0031	-0.0044	0.0058	0.0075	-0.0004	0.002	0.0158	0.0053	-0.0039
R2.23	0.0023	-0.0032	-0.0041	0.0132	-0.0032	-0.0022	-0.0038	-0.0044	-0.0045
R2.24	0.0022	0.0039	0.0145	-0.0005	-0.0046	-0.0037	-0.0039	0.0158	-0.0046
R2.25	-0.0033	0.0095	-0.0046	-0.0014	-0.0045	-0.0018	-0.0008	-0.0029	-0.0036
R2.26	-0.0029	0.0064	-0.0046	0.0008	-0.0037	0.0147	-0.0043	-0.0043	-0.0034
R2.27	-0.0046	0.0238	-0.0046	-0.0045	-0.0042	-0.004	-0.0001	-0.0046	0.0019
R2.28	-0.0045	0.007	0.0031	0.01	-0.0045	-0.0044	-0.0041	-0.0006	0.0002
R2.29	-0.0045	-0.0046	-0.0046	0.005	-0.0046	0.0078	0.0045	-0.0046	-0.0043
R2.30	-0.003	-0.0042	-0.0005	0.0108	0	-0.0013	0.0049	-0.0036	-0.0045
R2.31	-0.0041	-0.0013	-0.0033	-0.0046	-0.001	-0.002	-0.0035	-0.0029	-0.004
R2.32	0.0061	-0.0006	0.0473	-0.0037	0.0205	0.003	0.0201	0.0156	0.0075
R2.33	-0.0036	-0.0022	-0.0021	-0.0046	-0.004	-0.0041	0.0265	-0.0012	0.0037
R2.34	-0.0034	0.0101	0.0008	-0.0044	0.004	0.0057	-0.0044	0.0033	0.0285
R2.35	-0.0004	-0.0043	-0.0047	-0.0042	-0.0044	0.0112	-0.0035	-0.0044	-0.0046
R2.36	-0.0046	-0.0045	-0.0045	0.0102	-0.0046	-0.0037	-0.0046	-0.0046	-0.0047
R2.37	-0.0028	0.0083	-0.0009	-0.0046	-0.0016	-0.0043	-0.0042	-0.0032	-0.0001
R2.38	-0.004	-0.0027	-0.0035	-0.0025	-0.0041	0.0024	-0.0018	-0.0038	-0.0011
R2.39	0.0054	-0.0001	-0.0021	-0.0042	0.0003	-0.0039	-0.0025	-0.0008	-0.0031
R2.40	-0.0015	-0.0046	-0.0028	-0.001	0.0025	0.0158	0.0088	-0.0046	0.0044
R2.41	0.0119	0.0027	-0.0045	-0.0005	0.001	-0.0045	0.0013	-0.0046	-0.0012
R2.42	0	0.0078	0.0015	-0.0044	-0.0046	-0.0045	-0.0015	-0.0046	-0.0032
R2.43	-0.0025	-0.0037	0.0028	-0.0045	-0.0026	-0.0028	-0.0032	-0.0041	0.0005
R2.44	-0.0043	-0.0026	-0.0043	-0.004	-0.0006	0.0053	-0.004	0.003	-0.0016
R2.45	-0.0046	-0.0035	0.0042	0.0139	-0.0024	-0.0006	0.006	0.0111	0.0044
R2.46	-0.0029	-0.0019	-0.0045	0.0018	0.0023	0.009	-0.0031	-0.0035	-0.0017
R2.47	0.0013	-0.0047	-0.0026	-0.0009	-0.0043	0.0079	-0.0037	-0.0017	-0.0044
R2.48	-0.0046	-0.0012	-0.0033	-0.0028	-0.0005	-0.0046	0.0139	0.0067	-0.0046
R2.49	0.0013	-0.004	0.0053	0.0017	-0.0019	-0.0033	-0.0027	-0.001	-0.0016
R2.50	0.0011	0.0085	0.0011	-0.0041	-0.0046	-0.002	-0.0004	-0.0027	-0.0046
R2.51	0.0468	-0.0001	-0.0038	-0.0016	-0.0008	0.0154	-0.0009	0.0127	-0.0022
R2.52	-0.0034	-0.0045	-0.0041	-0.0044	-0.0036	-0.0046	0.0136	-0.0046	-0.0047
R2.53	0.0059	-0.0027	-0.0027	-0.0038	0.0061	0.0352	-0.0046	-0.0023	0.0004
R2.54	-0.0004	-0.0037	-0.0033	-0.0043	-0.0037	-0.0038	-0.0046	-0.0046	-0.0046
R2.55	0.0467	-0.0035	-0.0042	-0.0045	0.005	0.0008	-0.0046	-0.0031	0.0304
R2.56	0.0076	-0.0011	-0.0046	-0.0037	-0.0022	0.0038	0.0378	-0.0045	0.0003
R2.57	-0.0009	-0.0017	-0.0046	0.0151	-0.0027	-0.0046	-0.0043	-0.004	-0.0037
R2.58	-0.0024	0.0024	0.0017	-0.0023	-0.0045	0.0005	-0.0043	-0.0014	-0.0002
R2.59	-0.0028	-0.0034	-0.002	-0.0045	-0.0016	-0.0023	0.0137	0.0031	-0.0044
R2.60	-0.0046	-0.0046	-0.0044	-0.0046	-0.004	0.0012	-0.003	-0.0046	-0.001
R2.61	-0.0019	-0.0022	0.0064	-0.0029	0.0048	0.001	0.0018	-0.0003	-0.003
R2.62	-0.004	-0.0018	-0.0039	-0.0033	-0.0046	-0.0027	-0.0045	-0.0038	-0.0045
R2.63	0.0074	-0.0023	-0.004	-0.0013	-0.0044	-0.0014	0.008	-0.0046	-0.0041
R2.64	-0.0039	-0.0042	-0.0038	-0.002	-0.0044	-0.002	-0.0046	-0.004	0.0016
R2.65	-0.0037	0.0084	-0.0046	-0.0038	-0.004	-0.001	-0.0036	-0.0044	-0.0016
R2.66	-0.0046	-0.0032	-0.0046	-0.0044	0.0055	0.0042	-0.0024	-0.0027	0.0005
R2.67	0.0021	-0.0033	0.0011	-0.0013	-0.0046	-0.0011	-0.0046	-0.0021	0.0002
R2.68	0.0408	-0.0046	-0.0039	0.0001	-0.0046	-0.0043	-0.0004	-0.0046	-0.0046
R2.69	-0.0026	-0.0021	-0.0016	-0.0013	-0.0018	0.0115	-0.0043	0.0042	-0.0041
R2.70	0.0118	0.0068	0.0053	0.0018	-0.0044	-0.0034	0.0012	0.0351	0.0163
R2.71	-0.0023	-0.0046	-0.0035	0.002	0.0011	-0.002	0.0065	-0.0045	-0.0035
R2.72	-0.0033	0.0013	-0.0034	0.0076	-0.0042	-0.0027	-0.0024	-0.0002	-0.0028
R2.73	0.0017	-0.0046	0.0188	-0.0033	0.002	-0.0007	-0.004	0.0178	-0.0043
R2.74	-0.0032	-0.0042	0.0077	0.0138	0.019	-0.003	-0.0046	-0.0024	-0.0041
R2.75	-0.0039	-0.0041	-0.0043	-0.004	-0.0044	-0.0023	-0.0046	-0.0046	-0.0004
R2.76	-0.001	0.0003	-0.004	-0.0025	-0.0044	0.0175	0.002	-0.002	-0.0033
R2.77	0.0126	-0.0046	-0.0042	0.0003	0.0021	-0.0045	-0.0044	-0.0029	-0.0036
R2.78	-0.0042	0.0035	0.0039	-0.0043	-0.0043	0.0021	0.018	-0.0001	-0.0045
R2.79	0.0106	0.0106	0.0003	-0.0046	0.0347	-0.0033	0.0069	0.0041	0.0009
R2.80	0.0001	-0.0047	0.0004	-0.0014	0.0077	-0.0029	0.0012	-0.004	-0.003
R2.81	-0.0043	-0.0044	-0.001	-0.0006	-0.0043	-0.0043	-0.0032	-0.0046	-0.0021
R2.82	-0.0012	-0.0046	0.0026	0.0067	-0.0017	-0.0001	0.0002	-0.0018	-0.0027
R2.83	0.0134	0.0156	0.0005	-0.0008	-0.0023	-0.0034	0.0017	-0.0041	-0.0017
R2.84	0.0287	-0.0001	0.0003	-0.0033	-0.0016	-0.0037	-0.0036	0.0059	-0.0031
R2.85	-0.0044	-0.0043	0.0091	-0.0027	-0.0046	-0.0037	0.0019	0.0025	-0.0015
R2.86	-0.0046	-0.0036	0.0199	0.0183	-0.0043	-0.0045	-0.0038	0.0203	0.0264
R2.87	-0.0005	0.0096	0.0106	-0.0018	-0.0035	-0.0046	-0.004	0.0055	-0.0028
R2.88	0.0008	-0.0044	0.0058	-0.0046	0.0007	0.0106	-0.0035	0.0008	-0.0006
R2.89	0.0002	-0.004	-0.0032	-0.0003	0.0138	0.0029	-0.0001	-0.0046	0.004
R2.90	0.0265	-0.0026	0.0008	0.0065	0.0214	0.0128	-0.0038	-0.0015	0.0075
R2.91	0.0138	-0.0045	-0.0045	-0.0021	-0.0038	-0.0041	-0.004	-0.0023	0.0007
R2.92	-0.0047	-0.0013	0.0103	-0.0045	-0.0037	-0.0041	-0.0044	0.0124	-0.0031
R2.93	-0.0046	0.0007	0.0054	-0.0042	-0.0045	-0.0034	-0.0007	0.0013	-0.0037
R2.94	-0.0028	-0.0017	0.0041	0.004	-0.003	-0.0007	-0.004	0.0007	-0.0036
R2.95	-0.0031	0.0069	-0.0044	-0.0008	0.0006	-0.0044	-0.0037	-0.0024	-0.0044
R2.96	-0.0042	0.0001	0.0056	-0.0042	0.0175	0.0037	-0.0046	-0.0002	-0.0037
R2.97	-0.0046	-0.0041	-0.0046	-0.0046	-0.0017	-0.0044	0.0003	-0.0045	-0.0012
R2.98	0.0015	-0.0045	0.0027	-0.0028	-0.0007	-0.0021	-0.0046	-0.0046	-0.0045
R2.99	0.0042	-0.0023	-0.0036	-0.0003	0.0121	0.0004	-0.0045	-0.0047	0.0042
R2.100	-0.0046	-0.002	-0.0044	-0.0011	-0.0046	-0.0041	-0.0039	-0.0041	0.0008

## Sheet: Stem Splitting Rate -  Null Model R2
univariate.null.model	sqrt(phylo.div.rate.stem.0.9)~abs.lat.mid	sqrt(phylo.div.rate.stem.0.9)~elevation	sqrt(phylo.div.rate.stem.0.9)~sqrt(MeanHandWingIndex)	sqrt(phylo.div.rate.stem.0.9)~MeanTarsus	sqrt(phylo.div.rate.stem.0.9)~prop.range.sampled	sqrt(phylo.div.rate.stem.0.9)~sqrt(range.size)
R2.1	0.0082	-0.0045	0.0269	-0.0004	-0.0038	-0.0012
R2.2	-0.0017	-0.0036	0.0036	-0.0019	0.0124	-0.0028
R2.3	-0.0039	0.0085	-0.0046	0.0093	0.0214	0.0027
R2.4	0.0029	0.0023	-0.0009	-0.0046	-0.0046	-0.0042
R2.5	-0.0042	0.0013	0.0143	0.022	0.0102	-0.0043
R2.6	-0.0026	-0.0036	0.0007	-0.0035	-0.0027	-0.0032
R2.7	0.0545	0.0059	0.0049	0.0016	-0.0046	-0.0011
R2.8	-0.0024	-0.0008	-0.0041	0.0126	0.0055	-0.0045
R2.9	-0.0039	-0.0005	-0.0016	0.0076	-0.0043	-0.0015
R2.10	-0.0012	0.0016	-0.0038	-0.004	-0.0046	-0.0046
R2.11	0.0091	-0.0042	0.0047	-0.0013	-0.0046	-0.0016
R2.12	-0.0036	0.0026	-0.0008	0.0194	-0.0036	0.0001
R2.13	-0.0042	-0.0037	-0.0032	0.0024	-0.0039	0.0032
R2.14	-0.0045	0.0176	-0.0028	0.0009	-0.004	0.0232
R2.15	-0.0044	-0.0019	-0.0034	-0.0038	0.0027	0.0047
R2.16	0.0021	-0.0039	-0.0031	0.008	0.0227	-0.0045
R2.17	-0.0007	-0.0038	-0.0046	-0.0046	-0.0038	-0.0034
R2.18	0.0071	-0.0023	-0.0044	-0.003	0.0106	-0.0021
R2.19	0.0028	-0.0046	-0.004	-0.0027	-0.0003	-0.0043
R2.20	-0.0047	-0.0046	-0.0044	0.0044	0.0007	-0.0043
R2.21	-0.0039	-0.0014	-0.0014	0.0184	0.0038	0.0029
R2.22	-0.0033	-0.0045	0.0026	0.0162	0.0078	-0.0039
R2.23	0.0027	-0.0034	-0.002	-0.0039	0.0123	-0.0045
R2.24	0.0026	0.0042	-0.0036	-0.004	-0.0002	-0.0046
R2.25	-0.0025	0.01	-0.0012	-0.0003	-0.0009	-0.0036
R2.26	-0.0031	0.0064	0.0142	-0.0043	0.0011	-0.0033
R2.27	-0.0046	0.0246	-0.0038	-0.0006	-0.0044	0.0021
R2.28	-0.0045	0.0068	-0.0043	-0.0042	0.0094	0.0006
R2.29	-0.0045	-0.0046	0.008	0.0047	0.0052	-0.0043
R2.30	-0.0028	-0.0041	-0.0017	0.0043	0.0112	-0.0045
R2.31	-0.0039	-0.0015	-0.0017	-0.0035	-0.0046	-0.004
R2.32	0.0058	-0.001	0.0022	0.0212	-0.0036	0.0068
R2.33	-0.0037	-0.0022	-0.0039	0.0269	-0.0046	0.0037
R2.34	-0.0034	0.0107	0.0052	-0.0044	-0.0044	0.0282
R2.35	-0.0008	-0.0043	0.0115	-0.0035	-0.0039	-0.0045
R2.36	-0.0046	-0.0044	-0.0039	-0.0046	0.011	-0.0046
R2.37	-0.0025	0.0082	-0.0043	-0.0042	-0.0046	-0.0001
R2.38	-0.0036	-0.0025	0.0014	-0.0025	-0.0029	-0.0011
R2.39	0.0061	0.0001	-0.0038	-0.0028	-0.0042	-0.0026
R2.40	-0.0016	-0.0046	0.0161	0.0093	-0.0011	0.0041
R2.41	0.0125	0.0024	-0.0045	0.0009	0.0001	-0.0013
R2.42	0.0002	0.008	-0.0046	-0.0019	-0.0043	-0.0033
R2.43	-0.0023	-0.0036	-0.003	-0.0033	-0.0045	0.001
R2.44	-0.0043	-0.0029	0.0062	-0.004	-0.0041	-0.0015
R2.45	-0.0045	-0.0035	-0.0004	0.0063	0.0131	0.0041
R2.46	-0.0028	-0.0019	0.0089	-0.003	0.0017	-0.0016
R2.47	0.0013	-0.0046	0.0074	-0.004	-0.0008	-0.0045
R2.48	-0.0046	-0.0012	-0.0047	0.0121	-0.0031	-0.0046
R2.49	0.0015	-0.004	-0.0034	-0.0029	0.0018	-0.0015
R2.50	0.0013	0.0067	-0.0022	-0.0002	-0.004	-0.0046
R2.51	0.0436	0	0.0163	-0.001	-0.0019	-0.0019
R2.52	-0.0033	-0.0046	-0.0047	0.0139	-0.0043	-0.0046
R2.53	0.0062	-0.003	0.0362	-0.0046	-0.0039	0.0005
R2.54	-0.0008	-0.0039	-0.004	-0.0046	-0.0041	-0.0046
R2.55	0.0438	-0.0033	0.0003	-0.0046	-0.0046	0.0309
R2.56	0.0083	-0.0011	0.0038	0.0383	-0.0041	0.0003
R2.57	-0.0011	-0.0016	-0.0046	-0.0043	0.0151	-0.0036
R2.58	-0.0027	0.0035	0.0004	-0.0042	-0.0023	0.0005
R2.59	-0.0028	-0.0032	-0.0023	0.0149	-0.0044	-0.0045
R2.60	-0.0045	-0.0045	0.0013	-0.0029	-0.0046	-0.0012
R2.61	-0.0024	-0.0023	0.0013	0.0024	-0.003	-0.0031
R2.62	-0.0041	-0.0014	-0.0029	-0.0046	-0.0037	-0.0045
R2.63	0.0072	-0.0026	-0.0014	0.0076	-0.0012	-0.0041
R2.64	-0.0041	-0.0044	-0.0019	-0.0047	-0.0017	0.0014
R2.65	-0.0037	0.0083	-0.0013	-0.0035	-0.0038	-0.0018
R2.66	-0.0046	-0.0029	0.0042	-0.0026	-0.0044	0.0011
R2.67	0.0024	-0.0034	-0.0011	-0.0046	-0.0015	-0.0003
R2.68	0.0406	-0.0045	-0.004	-0.0004	0.0004	-0.0046
R2.69	-0.0029	-0.0022	0.0117	-0.0045	-0.0016	-0.0043
R2.70	0.011	0.0065	-0.0037	0.0017	0.0018	0.0152
R2.71	-0.0021	-0.0046	-0.0017	0.0061	0.0021	-0.0033
R2.72	-0.0036	0.0013	-0.0025	-0.0025	0.0068	-0.0026
R2.73	0.002	-0.0046	-0.001	-0.004	-0.0032	-0.0041
R2.74	-0.0033	-0.0043	-0.0028	-0.0046	0.0137	-0.0041
R2.75	-0.0034	-0.0042	-0.002	-0.0046	-0.0036	0.0001
R2.76	-0.0013	0.0003	0.0168	0.0016	-0.0019	-0.0036
R2.77	0.0132	-0.0046	-0.0045	-0.0042	0.0002	-0.0037
R2.78	-0.0042	0.0047	0.0024	0.0187	-0.0043	-0.0045
R2.79	0.0114	0.01	-0.0028	0.0069	-0.0046	0.001
R2.80	-0.0005	-0.0046	-0.0024	0.0017	-0.0015	-0.0033
R2.81	-0.0044	-0.0043	-0.0044	-0.0032	-0.0007	-0.002
R2.82	-0.0009	-0.0047	-0.0002	0.0007	0.0074	-0.0026
R2.83	0.0145	0.0166	-0.0024	0.001	-0.0005	-0.0015
R2.84	0.0296	-0.0001	-0.0037	-0.0035	-0.0036	-0.0032
R2.85	-0.0045	-0.0044	-0.0038	0.0027	-0.0024	-0.0014
R2.86	-0.0046	-0.0036	-0.0045	-0.0037	0.0172	0.0251
R2.87	-0.001	0.0095	-0.0047	-0.004	-0.0014	-0.0029
R2.88	0.0007	-0.0044	0.0108	-0.0037	-0.0046	-0.0006
R2.89	0.0004	-0.0041	0.0039	0.0001	-0.0004	0.004
R2.90	0.0271	-0.0024	0.0116	-0.0036	0.007	0.0072
R2.91	0.0148	-0.0045	-0.0042	-0.0038	-0.002	0.0003
R2.92	-0.0046	-0.0012	-0.0041	-0.0044	-0.0046	-0.0035
R2.93	-0.0046	0.001	-0.0037	-0.0004	-0.004	-0.0038
R2.94	-0.003	-0.002	-0.0005	-0.004	0.0043	-0.0039
R2.95	-0.0034	0.0073	-0.0044	-0.0039	-0.0014	-0.0046
R2.96	-0.0043	0.0002	0.0037	-0.0044	-0.0042	-0.0036
R2.97	-0.0046	-0.0042	-0.0045	0.0002	-0.0046	-0.0015
R2.98	0.0022	-0.0044	-0.0023	-0.0046	-0.0023	-0.0045
R2.99	0.0037	-0.0025	0.0003	-0.0046	-0.0004	0.0036
R2.100	-0.0046	-0.002	-0.0043	-0.0038	-0.0013	0.0004

## Sheet: Crown Splitting Rate -  Null Model R2
univariate.null.model	sqrt(phylo.div.rate.crown.0.9)~abs.lat.mid	sqrt(phylo.div.rate.crown.0.9)~elevation	sqrt(phylo.div.rate.crown.0.9)~sqrt(MeanHandWingIndex)	sqrt(phylo.div.rate.crown.0.9)~MeanTarsus	sqrt(phylo.div.rate.crown.0.9)~prop.range.sampled	sqrt(phylo.div.rate.crown.0.9)~sqrt(range.size)
R2.1	0.0068	-0.0044	0.0264	-0.0025	-0.0037	-0.0026
R2.2	-0.004	-0.0039	0.0077	-0.0012	0.0084	-0.003
R2.3	-0.0045	0.0121	-0.0047	0.0125	0.0243	0.0009
R2.4	0.0014	0.0011	-0.0014	-0.0047	-0.0046	-0.0045
R2.5	-0.0044	0.0021	0.0147	0.018	0.0087	-0.0044
R2.6	-0.0032	-0.0025	0.0008	-0.0037	-0.0034	-0.0029
R2.7	0.0515	0.0067	0.0043	0.0028	-0.0046	-0.0017
R2.8	-0.003	-0.0026	-0.0045	0.014	0.0049	-0.0041
R2.9	-0.0044	-0.0014	-0.0003	0.0077	-0.0032	-0.0014
R2.10	-0.0027	0.0013	-0.0031	-0.004	-0.0047	-0.0044
R2.11	0.0065	-0.0037	0.0071	-0.0012	-0.0046	-0.0014
R2.12	-0.002	0.0009	-0.0002	0.0244	-0.0036	-0.0031
R2.13	-0.0045	-0.0038	-0.004	0.003	-0.0032	0.0043
R2.14	-0.0046	0.0149	-0.003	0.0029	-0.0042	0.0197
R2.15	-0.0044	-0.002	-0.0035	-0.0042	0.0013	0.0053
R2.16	0.0019	-0.0035	-0.0033	0.0096	0.0233	-0.0046
R2.17	-0.0016	-0.004	-0.0046	-0.0046	-0.0045	-0.003
R2.18	0.0082	-0.0001	-0.0041	-0.0033	0.0083	-0.0025
R2.19	0.0035	-0.0046	-0.0035	-0.0034	-0.001	-0.0042
R2.20	-0.0046	-0.0046	-0.0043	0.0027	0.0003	-0.0042
R2.21	-0.0031	-0.0022	-0.0011	0.0132	0.0034	0.0028
R2.22	-0.0035	-0.0041	0.0001	0.0112	0.0083	-0.0032
R2.23	0.0019	-0.0036	-0.002	-0.0038	0.0124	-0.0044
R2.24	-0.0006	0.005	-0.0038	-0.0038	-0.0006	-0.0044
R2.25	-0.0023	0.0088	0.0006	-0.0013	-0.0014	-0.004
R2.26	-0.002	0.0071	0.0149	-0.0039	-0.0011	-0.0034
R2.27	-0.0047	0.024	-0.0042	0.002	-0.0046	0.0019
R2.28	-0.0042	0.0079	-0.0038	-0.0043	0.0106	0.0004
R2.29	-0.0046	-0.0045	0.0073	0.0052	0.0038	-0.0044
R2.30	-0.0026	-0.0041	-0.0007	0.0056	0.0089	-0.0045
R2.31	-0.0044	-0.0014	-0.0001	-0.0042	-0.0045	-0.0043
R2.32	0.003	-0.0004	0.0017	0.0159	-0.0031	0.0056
R2.33	-0.0039	-0.0026	-0.0044	0.0242	-0.0045	0.0018
R2.34	-0.003	0.0097	0.0058	-0.0046	-0.0041	0.0298
R2.35	-0.0003	-0.0037	0.0129	-0.0038	-0.0041	-0.004
R2.36	-0.0045	-0.0044	-0.0042	-0.0044	0.0115	-0.0046
R2.37	-0.0026	0.009	-0.0041	-0.004	-0.0046	0.0006
R2.38	-0.0038	-0.0031	0.004	-0.0015	-0.0027	-0.001
R2.39	0.0049	-0.0015	-0.0041	-0.0033	-0.0038	-0.0038
R2.40	0.0002	-0.0046	0.02	0.0091	-0.0014	0.0045
R2.41	0.0138	0.0026	-0.0046	0.0023	-0.0007	-0.0017
R2.42	-0.0002	0.0103	-0.0046	-0.0022	-0.0045	-0.0031
R2.43	-0.0027	-0.004	-0.0027	-0.0025	-0.0046	0.0006
R2.44	-0.0041	-0.0035	0.0042	-0.0029	-0.0041	-0.0006
R2.45	-0.0046	-0.0035	-0.0007	0.0057	0.0147	0.0048
R2.46	-0.0027	-0.0016	0.0063	-0.0027	0.0026	-0.002
R2.47	0.0027	-0.0046	0.0084	-0.0037	-0.0015	-0.0046
R2.48	-0.0046	0.0006	-0.0046	0.0141	-0.0031	-0.0043
R2.49	0.0005	-0.0028	-0.0035	-0.0019	0.0004	0
R2.50	0.0015	0.0075	-0.0015	-0.0007	-0.0039	-0.0046
R2.51	0.0432	0.0029	0.0138	-0.0002	-0.0013	-0.0018
R2.52	-0.0039	-0.0045	-0.0046	0.0099	-0.0046	-0.0046
R2.53	0.0084	-0.0026	0.0372	-0.0042	-0.0037	-0.0005
R2.54	-0.0001	-0.0039	-0.0036	-0.0046	-0.0046	-0.0046
R2.55	0.0532	-0.0034	0.0002	-0.0046	-0.0046	0.0259
R2.56	0.0059	-0.0007	0.0053	0.0411	-0.0038	-0.0013
R2.57	0.0002	-0.0026	-0.0046	-0.0045	0.0161	-0.0035
R2.58	-0.0016	0.0018	0.002	-0.0043	-0.003	-0.0004
R2.59	-0.002	-0.0036	-0.0025	0.0141	-0.0045	-0.0044
R2.60	-0.0046	-0.0045	0.0015	-0.0035	-0.0046	0.0006
R2.61	-0.0026	-0.0022	-0.0001	0.0034	-0.0029	-0.004
R2.62	-0.0042	-0.0017	-0.0013	-0.0046	-0.0037	-0.0046
R2.63	0.0074	-0.0018	-0.0018	0.0086	-0.0023	-0.0037
R2.64	-0.004	-0.0042	-0.0014	-0.0046	-0.0036	0.0024
R2.65	-0.0034	0.0084	-0.0013	-0.0028	-0.0034	-0.0012
R2.66	-0.0046	-0.0036	0.0033	-0.0022	-0.0045	0.0015
R2.67	0.0011	-0.0026	-0.001	-0.0046	-0.0007	0.0002
R2.68	0.0332	-0.0046	-0.0043	-0.0005	0.0011	-0.0046
R2.69	-0.0021	-0.0029	0.0101	-0.0045	-0.0022	-0.0042
R2.70	0.0098	0.009	-0.0022	0.0005	0.001	0.016
R2.71	-0.0034	-0.0045	-0.0035	0.0066	0.0024	-0.0041
R2.72	-0.0039	-0.0004	-0.002	-0.0009	0.008	-0.0035
R2.73	0.0019	-0.0046	0.0004	-0.0035	-0.0032	-0.0045
R2.74	-0.0039	-0.0045	-0.0032	-0.0043	0.0154	-0.0035
R2.75	-0.0037	-0.0041	-0.0022	-0.0046	-0.0037	-0.0004
R2.76	-0.0001	0.0008	0.0162	0.0022	-0.0037	-0.0028
R2.77	0.0122	-0.0046	-0.0046	-0.0044	-0.0007	-0.0034
R2.78	-0.0044	0.002	0.0014	0.0192	-0.004	-0.0046
R2.79	0.0125	0.0076	-0.0025	0.0093	-0.0046	0.0005
R2.80	0.0025	-0.0046	-0.0038	-0.0004	-0.0005	-0.0029
R2.81	-0.0042	-0.0046	-0.0043	-0.003	-0.0002	-0.0007
R2.82	0	-0.0046	0.0006	0.0003	0.0057	-0.0035
R2.83	0.0126	0.0114	-0.0044	0.0001	-0.0012	-0.0039
R2.84	0.029	0.0016	-0.0036	-0.004	-0.0022	-0.0031
R2.85	-0.0044	-0.0041	-0.0042	0.0028	-0.0025	-0.0023
R2.86	-0.0046	-0.0041	-0.0046	-0.0042	0.0162	0.0252
R2.87	-0.0001	0.0096	-0.0046	-0.004	-0.0018	-0.0026
R2.88	-0.0004	-0.0042	0.0102	-0.0036	-0.0045	-0.0018
R2.89	0.0017	-0.004	0.004	-0.0001	-0.0005	0.0027
R2.90	0.0296	-0.0028	0.0154	-0.0044	0.0052	0.0074
R2.91	0.0102	-0.0046	-0.004	-0.0035	-0.0029	0.001
R2.92	-0.0045	-0.002	-0.0041	-0.0046	-0.0046	-0.0037
R2.93	-0.0043	0.0006	-0.0038	-0.0023	-0.0046	-0.0043
R2.94	-0.0034	-0.0015	-0.0017	-0.0043	0.0039	-0.0038
R2.95	-0.0037	0.0083	-0.0046	-0.0037	-0.0001	-0.0046
R2.96	-0.0041	-0.0001	0.0059	-0.0046	-0.0039	-0.0041
R2.97	-0.0046	-0.0043	-0.0044	0.0016	-0.0046	-0.0017
R2.98	0.001	-0.0042	-0.0006	-0.0045	-0.003	-0.0043
R2.99	0.0043	-0.0022	0.0009	-0.0043	-0.0003	0.0054
R2.100	-0.0044	-0.001	-0.0036	-0.0044	-0.0018	0.0017

## Sheet: Lineage Loss -  Null Model R2
univariate.null.model	lineage.loss~abs.lat.mid	lineage.loss~elevation	lineage.loss~sqrt(MeanHandWingIndex)	lineage.loss~MeanTarsus	lineage.loss~prop.range.sampled	lineage.loss~sqrt(range.size)
R2.1	-0.0046	0.0128	-0.0037	-0.0039	-0.0036	-0.002
R2.2	-0.0017	0.0044	-0.0045	-0.0044	0.0027	0.0018
R2.3	-0.0042	-0.0046	-0.003	-0.0045	-0.0029	-0.0018
R2.4	0.0094	-0.0037	-0.0044	-0.0047	-0.0013	-0.0019
R2.5	-0.0045	-0.0002	-0.0043	-0.001	-0.0038	0.0024
R2.6	-0.004	-0.0031	-0.0046	0.0051	0.0043	-0.0042
R2.7	0.0014	0.0094	0.0101	-0.002	0.0084	0.0036
R2.8	0.0079	0.0022	0.0006	-0.0046	-0.0037	-0.0024
R2.9	-0.0015	-0.0044	-0.0044	0.0024	-0.0027	-0.0045
R2.10	-0.0046	0.0014	-0.0042	-0.0041	0.0024	0.0015
R2.11	-0.0001	-0.0046	-0.0036	-0.0045	-0.0046	0.0091
R2.12	-0.0042	-0.0009	0.0003	-0.0046	0.0049	-0.0038
R2.13	-0.0034	0.0017	-0.0046	-0.0044	-0.0037	-0.0038
R2.14	0.0051	-0.0043	-0.0034	0.0139	-0.0045	-0.0047
R2.15	-0.0008	0.0118	-0.003	-0.0038	-0.0036	-0.0043
R2.16	-0.0042	-0.0017	0.0173	-0.0006	-0.0039	0.0043
R2.17	-0.003	-0.0046	-0.0046	-0.0046	0.0002	-0.0029
R2.18	-0.0044	0.0015	0.0085	-0.0045	-0.0037	-0.0027
R2.19	-0.0014	-0.0012	0.015	-0.0007	-0.0037	-0.0046
R2.20	-0.0046	0.0102	-0.0013	0.0445	0.0012	-0.0042
R2.21	0.0054	-0.001	-0.0038	-0.0045	0.012	-0.0038
R2.22	-0.0013	0.005	-0.0016	-0.0032	0.0072	-0.0042
R2.23	-0.004	-0.0021	0.0011	-0.0046	0.0047	0.0019
R2.24	0.0024	0.0084	0.0055	0.008	-0.0046	-0.0044
R2.25	-0.0046	-0.0034	0.0018	-0.003	-0.0021	-0.0008
R2.26	0.0018	-0.0036	0.0013	-0.0024	-0.0046	-0.0034
R2.27	-0.0027	-0.0006	-0.0041	-0.0011	-0.0046	-0.0033
R2.28	0.0024	0.0068	-0.0032	0.0067	0.0011	-0.0043
R2.29	-0.0034	-0.0018	-0.0026	-0.0043	-0.0031	0.0072
R2.30	0.0009	-0.001	-0.0038	0.0163	0.0469	-0.0047
R2.31	-0.0029	0.0066	0.0057	-0.0031	0.0003	-0.0013
R2.32	-0.0038	-0.0042	-0.0029	-0.0034	-0.0044	-0.0021
R2.33	0.0002	-0.0034	-0.0046	-0.0042	-0.0042	-0.0025
R2.34	-0.0033	-0.0041	-0.0022	-0.001	-0.0043	-0.0026
R2.35	0.0074	-0.0046	-0.0045	-0.0027	-0.0003	-0.0032
R2.36	-0.0031	0.0072	-0.003	-0.0041	0.0034	0.0083
R2.37	-0.0042	-0.0009	-0.0011	-0.0045	-0.0039	-0.0046
R2.38	-0.0041	-0.0019	-0.0008	0.0073	0.005	-0.0015
R2.39	-0.0045	-0.0046	-0.0046	-0.0025	-0.0046	-0.0043
R2.40	-0.0019	0.0003	0.0007	-0.0002	-0.0038	-0.0027
R2.41	-0.0046	0.0061	-0.0041	-0.001	-0.004	-0.0043
R2.42	-0.0033	-0.0047	-0.0038	0.0077	-0.0033	-0.0009
R2.43	0.0068	-0.0046	0.0444	-0.0045	-0.0036	-0.0011
R2.44	-0.0046	-0.0046	-0.0034	-0.0041	-0.0002	-0.0027
R2.45	-0.0045	0.0126	-0.0043	-0.0043	0.0206	0.0085
R2.46	-0.0022	-0.0025	-0.0047	-0.0046	0.0084	0.0025
R2.47	0.0003	-0.0035	-0.0046	-0.0032	-0.0011	0.0004
R2.48	0.0118	-0.0029	-0.0039	0.0291	0.0003	-0.0041
R2.49	-0.0045	0.001	-0.0023	-0.0043	-0.0026	-0.004
R2.50	-0.0046	-0.0025	0.002	0.0163	0.0057	-0.0018
R2.51	0.0062	-0.0038	-0.0018	0.0191	-0.0045	-0.0044
R2.52	0.0077	-0.0042	-0.0002	-0.003	0.0008	-0.0007
R2.53	-0.0046	-0.0046	-0.0046	-0.0012	-0.0032	0.002
R2.54	0.0117	-0.0041	0.0052	-0.0022	-0.0033	-0.0047
R2.55	-0.002	-0.0043	-0.0046	0.0052	-0.004	0.0018
R2.56	-0.0046	0.0011	0.002	0.0055	-0.0046	0.0046
R2.57	0.0089	0.0073	-0.0036	-0.0046	-0.0022	0.0098
R2.58	-0.0004	-0.0034	-0.0026	-0.0036	0.0162	0.0072
R2.59	0.0046	-0.004	-0.0046	-0.0017	-0.0036	-0.004
R2.60	-0.002	-0.0045	-0.0023	-0.0022	0.0086	0.0009
R2.61	0.0044	-0.0023	-0.0025	-0.0046	-0.002	0.0169
R2.62	-0.0038	-0.0045	-0.0035	-0.0001	-0.0036	-0.0024
R2.63	-0.0028	-0.0041	0.0005	0.0004	0.0333	0.0006
R2.64	-0.0012	-0.0042	-0.0042	-0.0043	0.0063	-0.0045
R2.65	0.0029	-0.0046	-0.0047	-0.0013	0.0011	-0.0035
R2.66	0.0099	-0.0038	0.0134	0.0034	0.0003	0.0156
R2.67	-0.0033	-0.0035	-0.0046	-0.0046	-0.0046	-0.0028
R2.68	-0.0046	-0.0046	-0.0043	0.0173	-0.0035	-0.0034
R2.69	0.0011	-0.0035	-0.0044	-0.0044	0.0009	-0.0046
R2.70	0.0103	0.0006	0.0233	-0.0024	-0.0006	0.0044
R2.71	-0.0045	-0.0043	0.0145	0.0077	-0.0039	-0.0023
R2.72	-0.0043	-0.0039	-0.0043	-0.0039	0.0082	-0.0046
R2.73	-0.0001	-0.0045	0.0003	-0.0045	-0.0042	-0.0001
R2.74	-0.0045	-0.0027	0.0008	-0.0018	-0.0025	-0.0034
R2.75	-0.004	-0.0044	-0.0047	0.0034	-0.0003	-0.0012
R2.76	0.0017	-0.0022	-0.0008	-0.0047	-0.0034	-0.0043
R2.77	-0.0046	-0.0027	0.0058	0.0022	0.0141	0.0092
R2.78	0.0006	-0.0002	-0.0035	0.0003	-0.0045	-0.0025
R2.79	0.0079	-0.0031	-0.0041	0.0176	0.0038	-0.0043
R2.80	0.0007	0.002	-0.0046	-0.0047	0.001	-0.0046
R2.81	0.0036	-0.0009	-0.004	0	-0.0024	0.0008
R2.82	-0.003	-0.0047	-0.0002	-0.0002	-0.0043	-0.0046
R2.83	0.0081	-0.0041	-0.0018	0.0019	-0.0029	-0.0041
R2.84	-0.0007	-0.0035	-0.0014	0.0091	-0.004	-0.0034
R2.85	-0.0024	0.0133	0.0021	-0.0019	-0.0024	-0.0033
R2.86	0.0012	0.0012	-0.0046	-0.0024	-0.003	-0.0029
R2.87	-0.0021	-0.0034	0.0041	-0.0005	-0.0046	-0.0039
R2.88	0.0015	0.0006	-0.0031	0.0071	-0.004	0.0018
R2.89	-0.0039	0.0108	-0.0041	-0.0008	-0.0022	-0.0039
R2.90	-0.0008	0.0006	0.0116	-0.0044	-0.0024	-0.0039
R2.91	0.006	0.0079	-0.0014	-0.0025	-0.0003	-0.0013
R2.92	-0.0044	-0.0036	0.0039	-0.0043	-0.0009	0.0107
R2.93	-0.0035	-0.0039	-0.0046	-0.0043	0.0046	-0.0046
R2.94	-0.0025	0.0079	-0.0046	-0.0031	-0.001	0.0331
R2.95	-0.0037	-0.0046	-0.0045	0.0012	-0.0041	0.006
R2.96	-0.0026	0.0187	0.0081	-0.0042	-0.0023	0.0069
R2.97	-0.0039	-0.0032	-0.0033	-0.0046	0.0103	-0.0028
R2.98	-0.0032	-0.0046	-0.0045	-0.0035	-0.0044	-0.0035
R2.99	-0.0039	-0.0046	0.0006	-0.0018	-0.0045	0.002
R2.100	0.0031	-0.0045	0.0107	-0.0043	-0.0045	-0.0041
